# Supplementary material for: Insights into gut microbiomes in stem cell transplantation by comprehensive shotgun long-read sequencing
Source: PubMed Central journal article supplement (PMC10876974; doi:10.1038/s41598-024-53506-1), 2024-02-19

11\_182

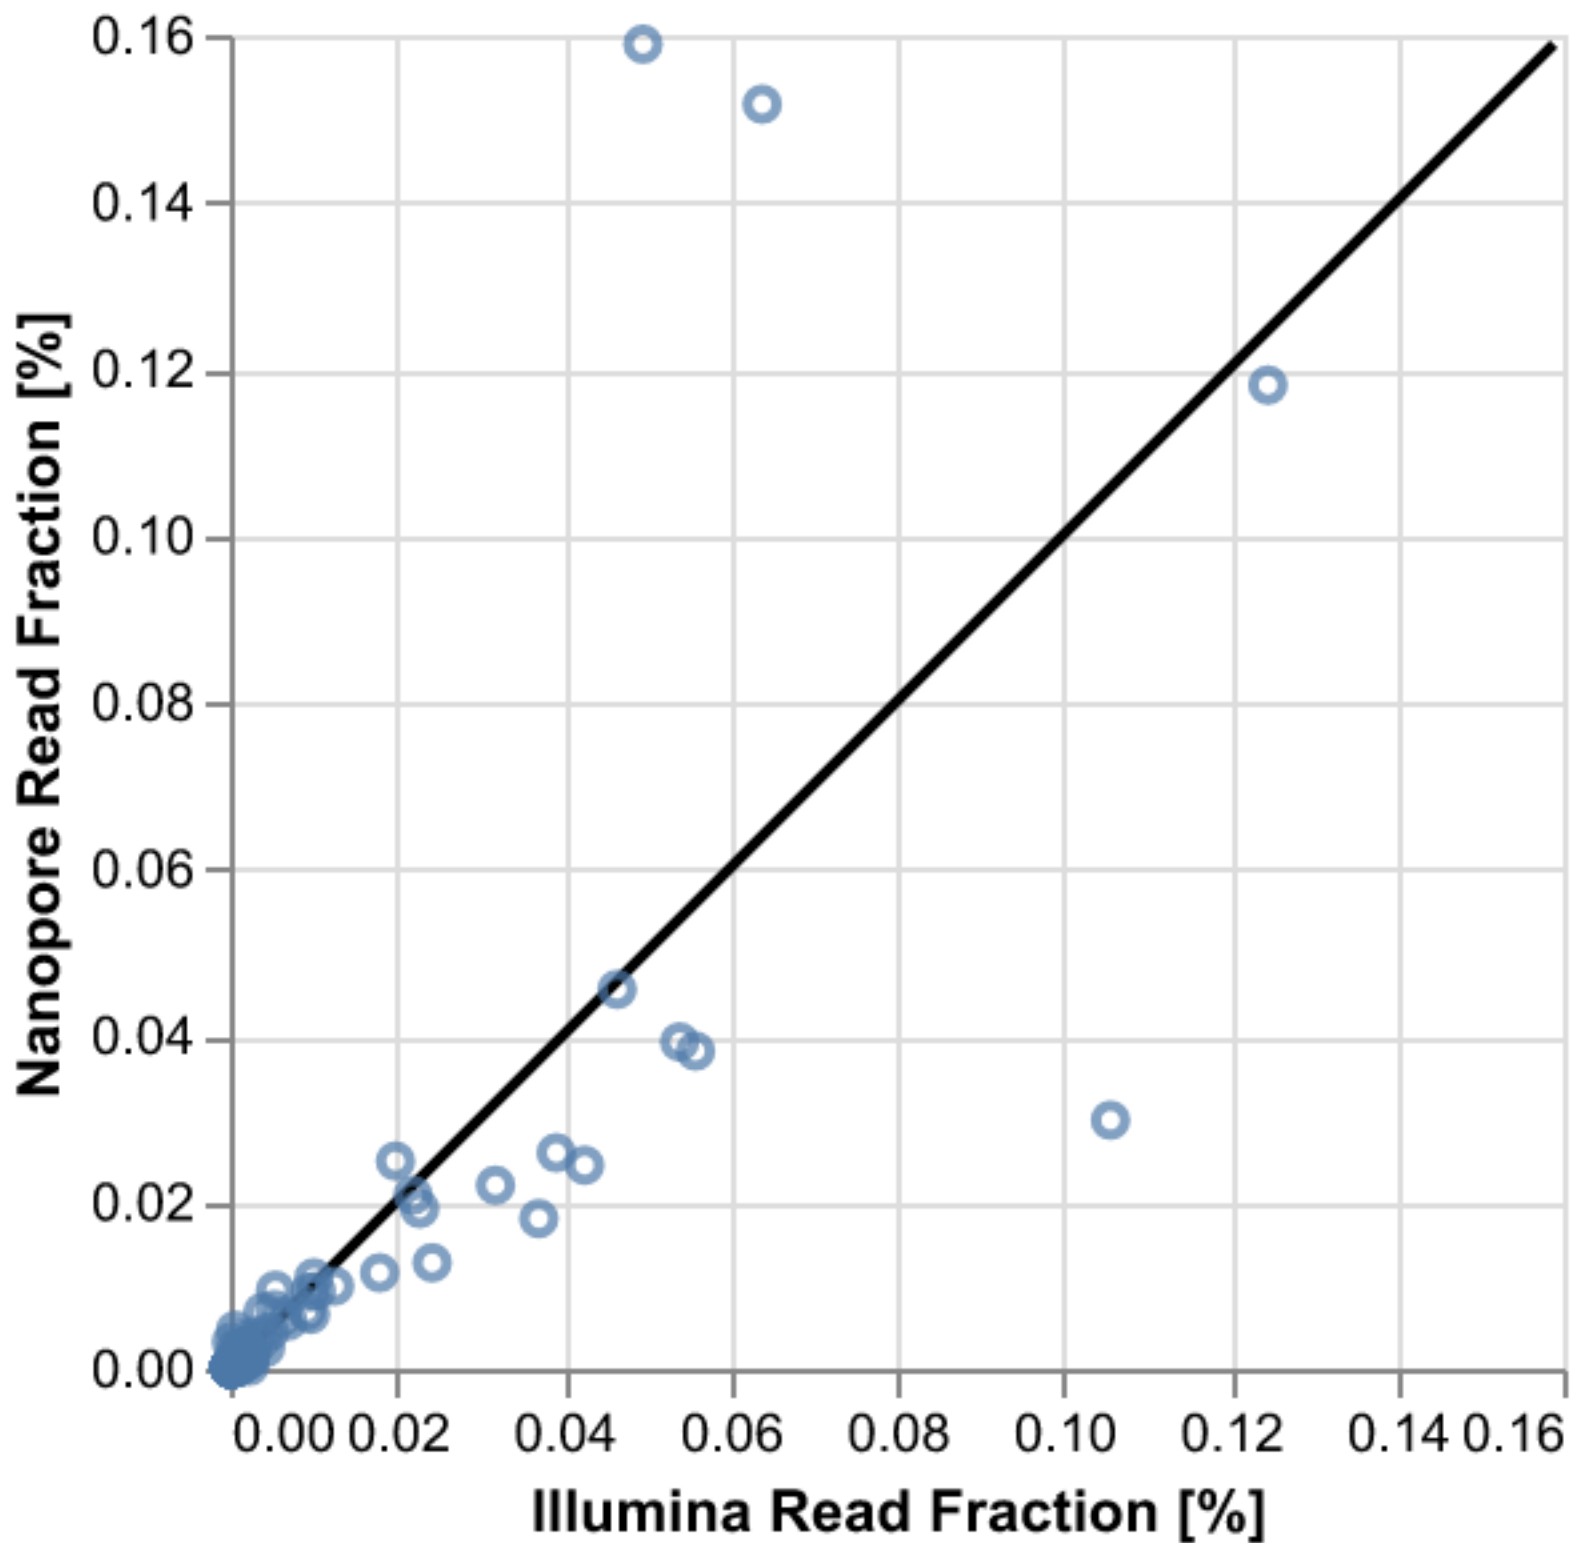

11\_-2

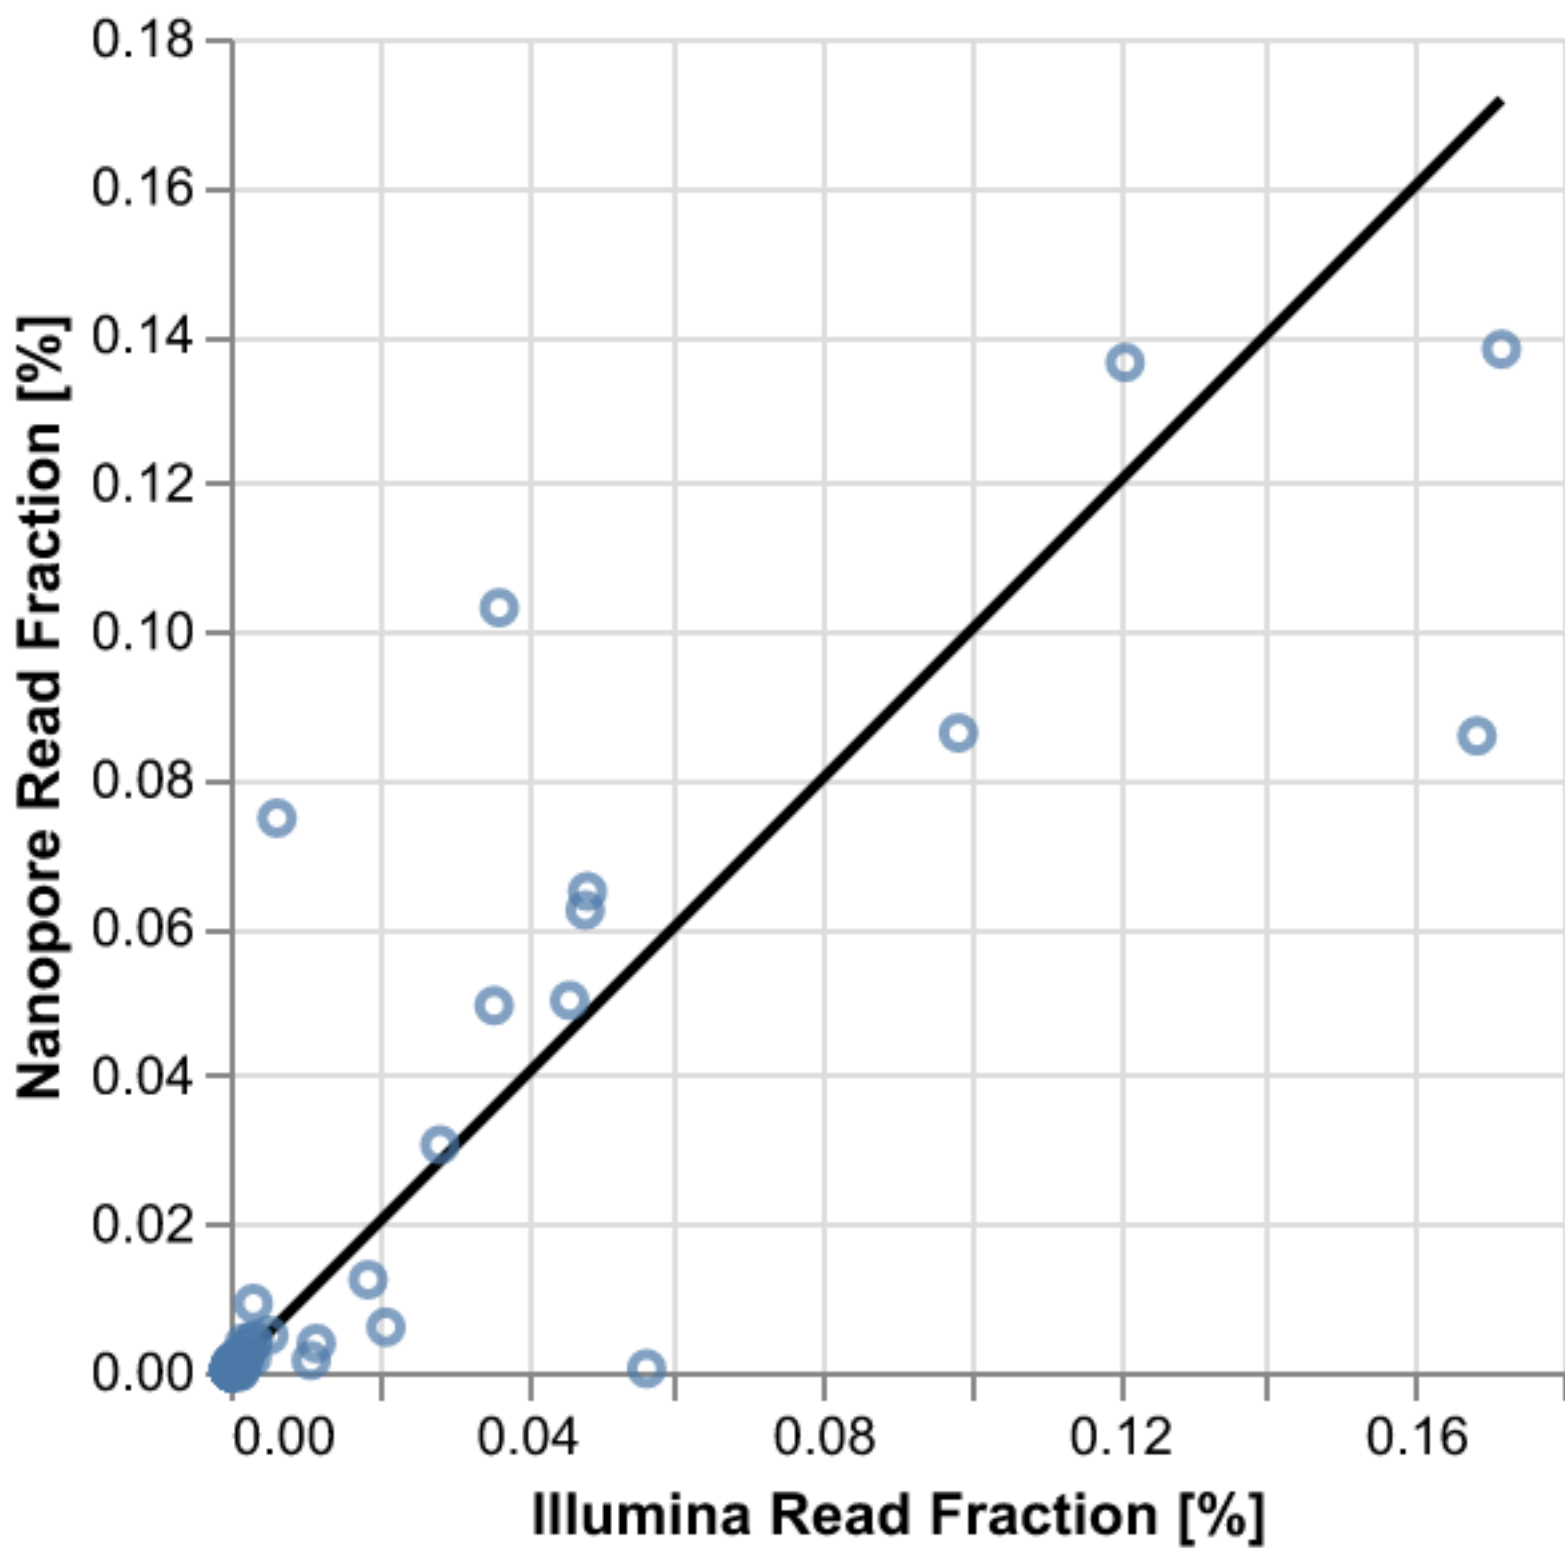



12\_34

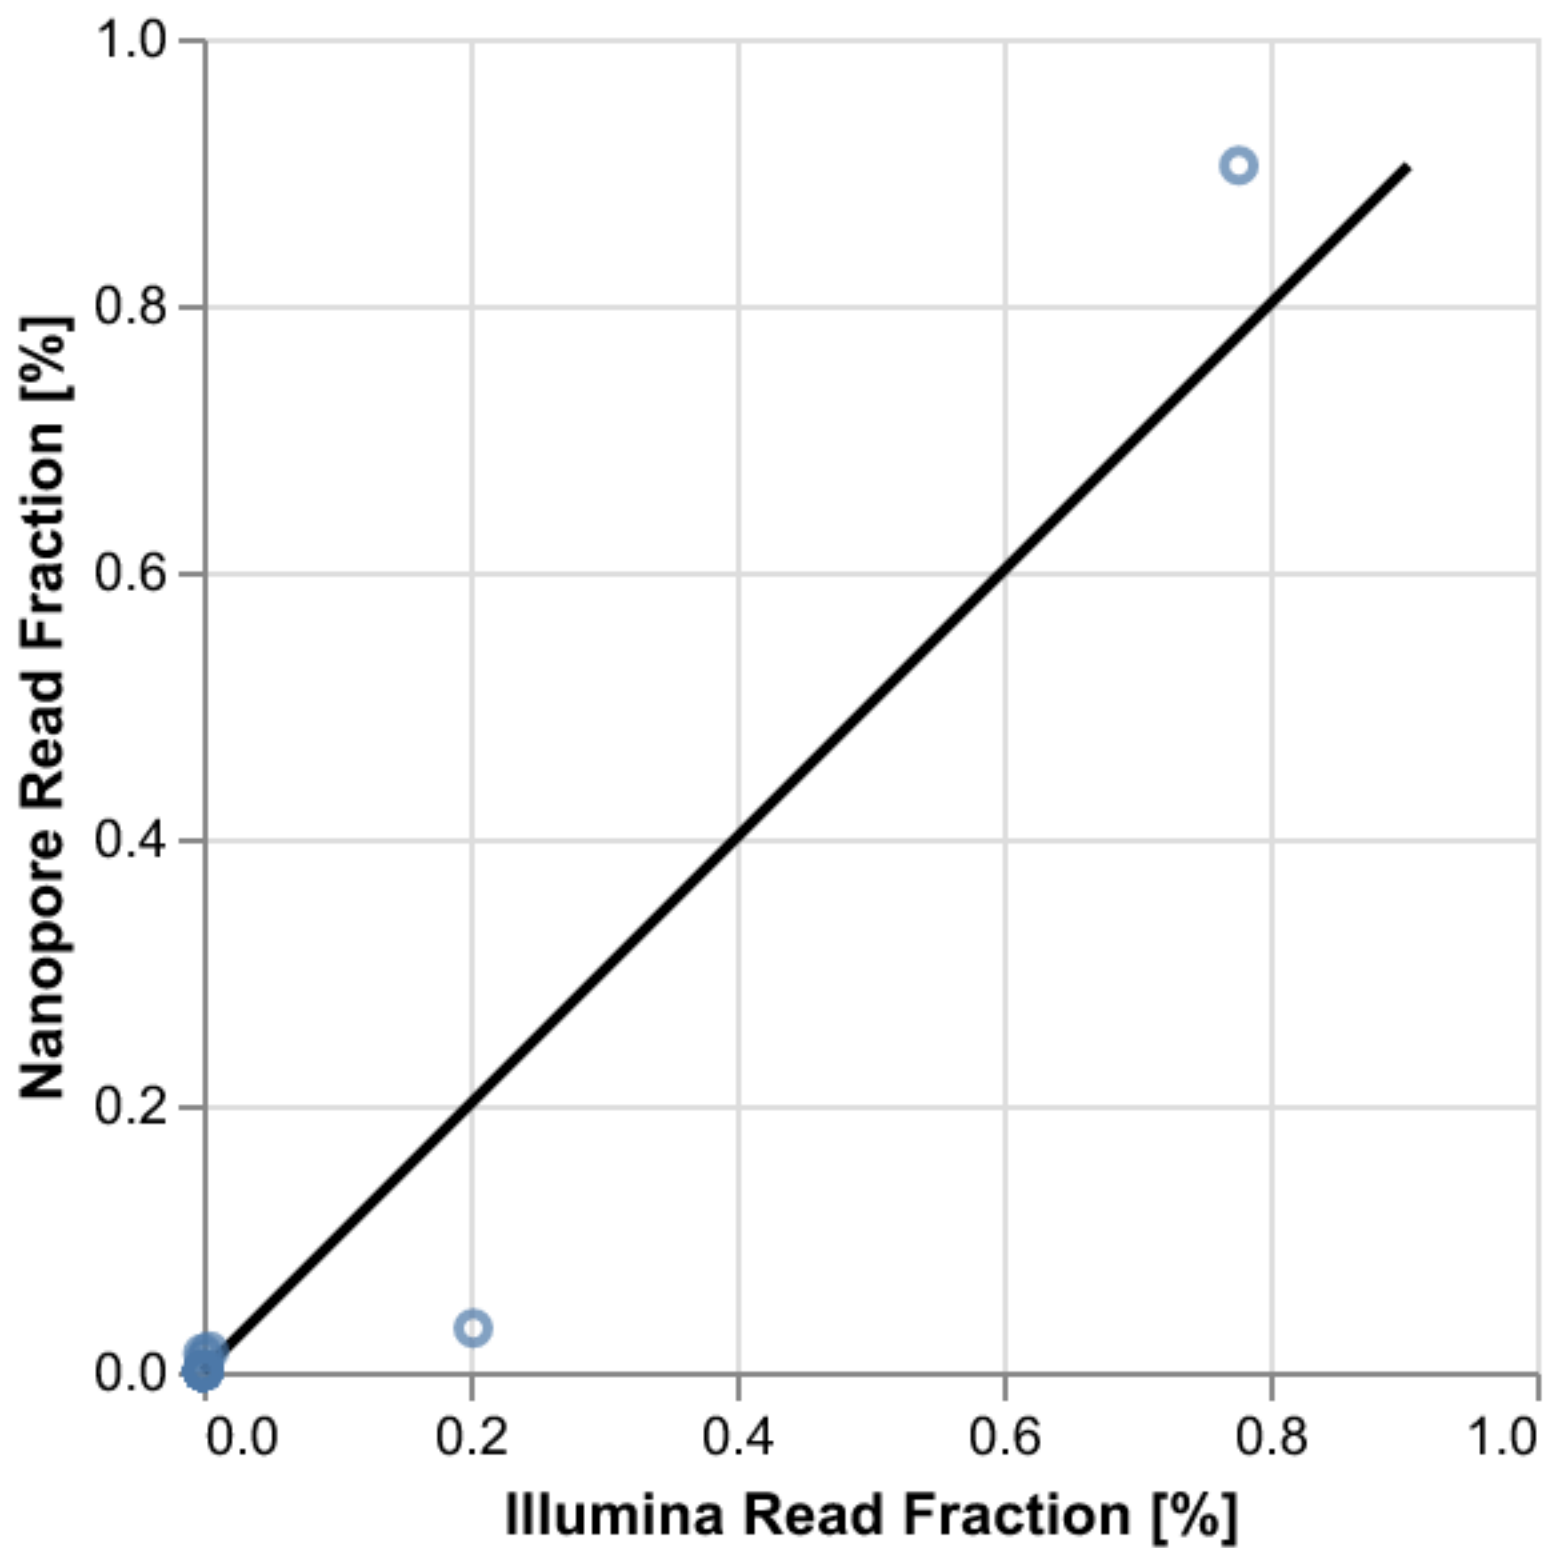

12\_-6

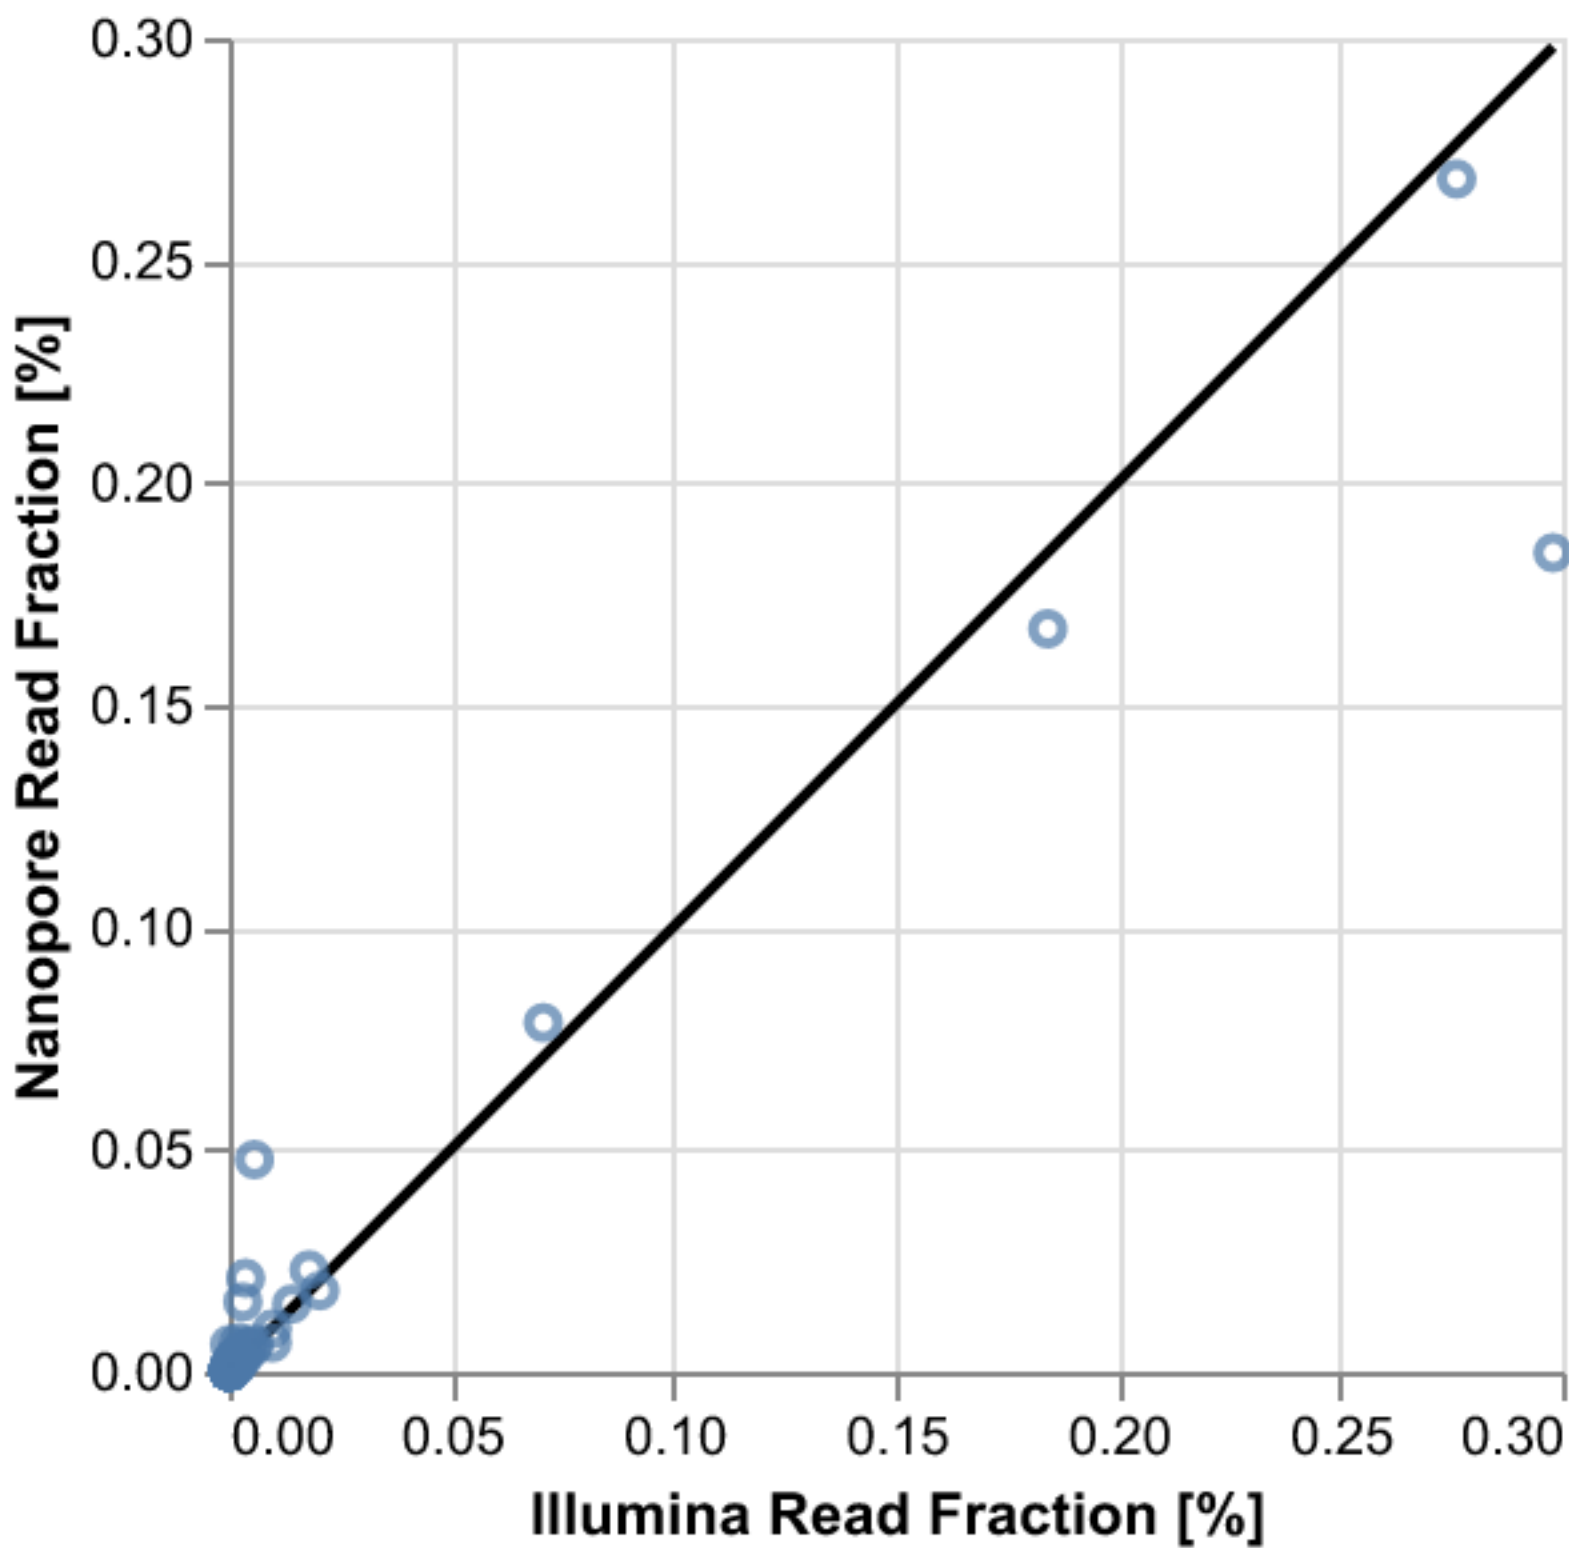

13\_298

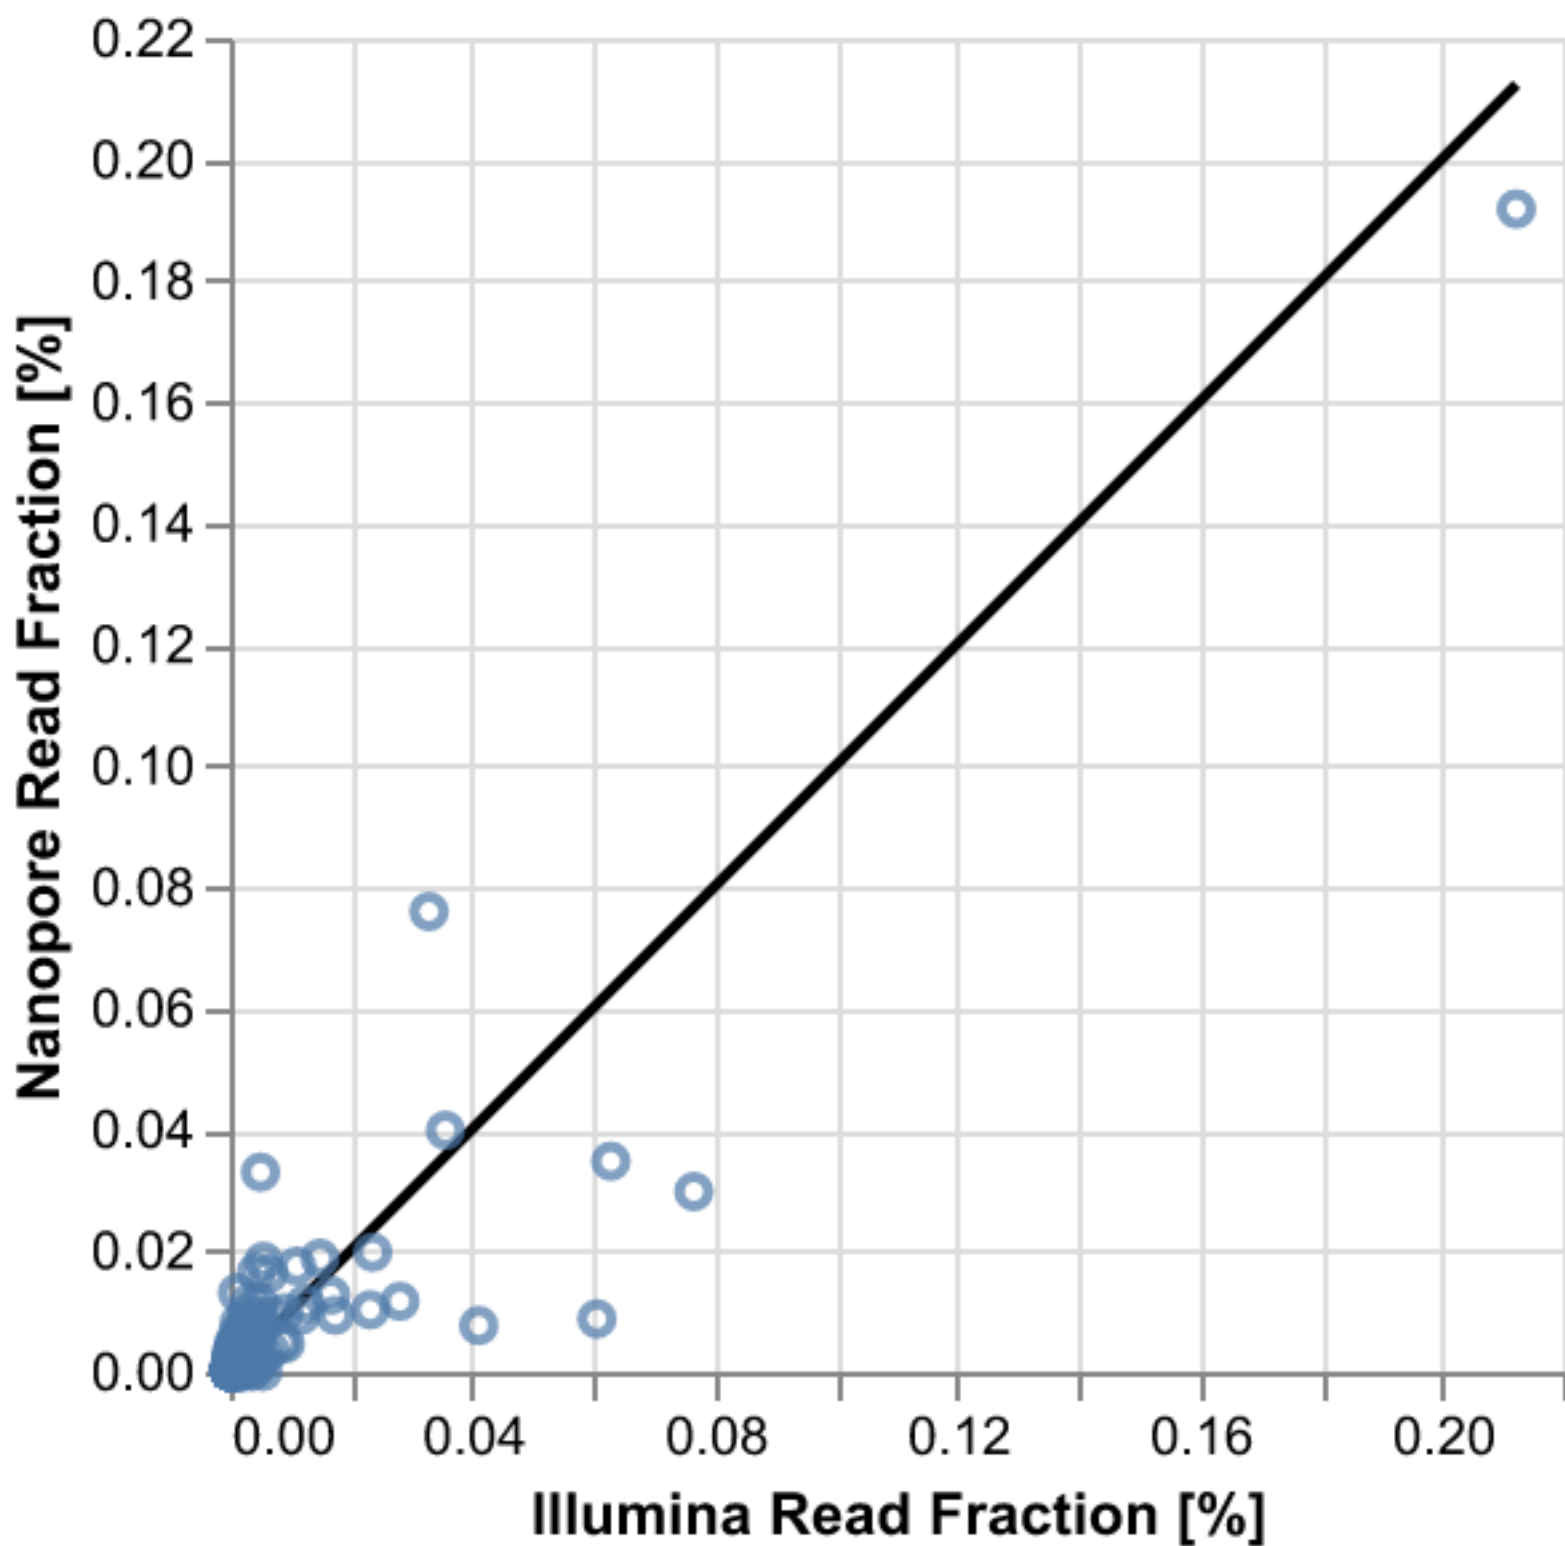

13\_-7

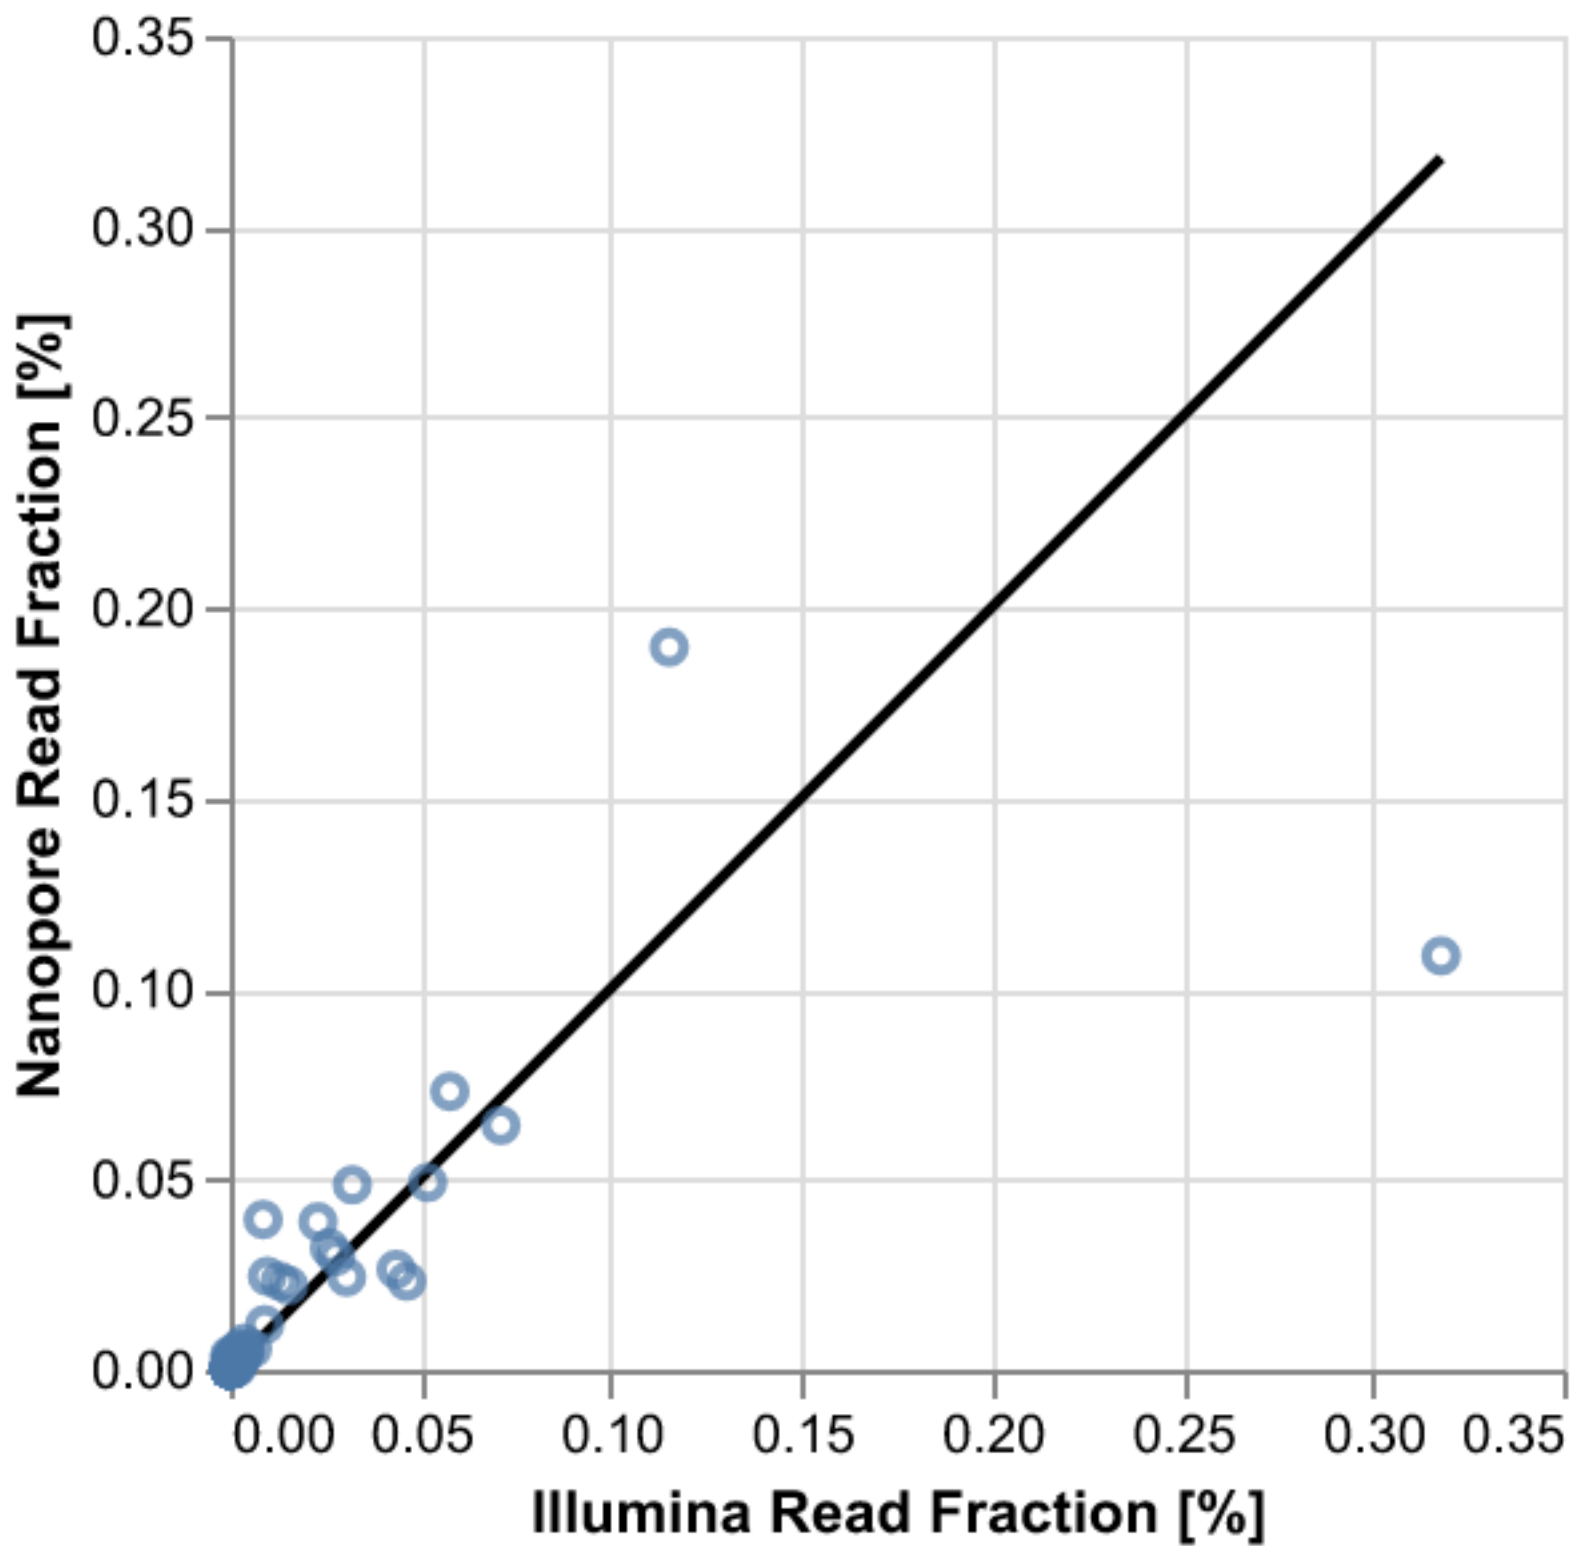







15\_16

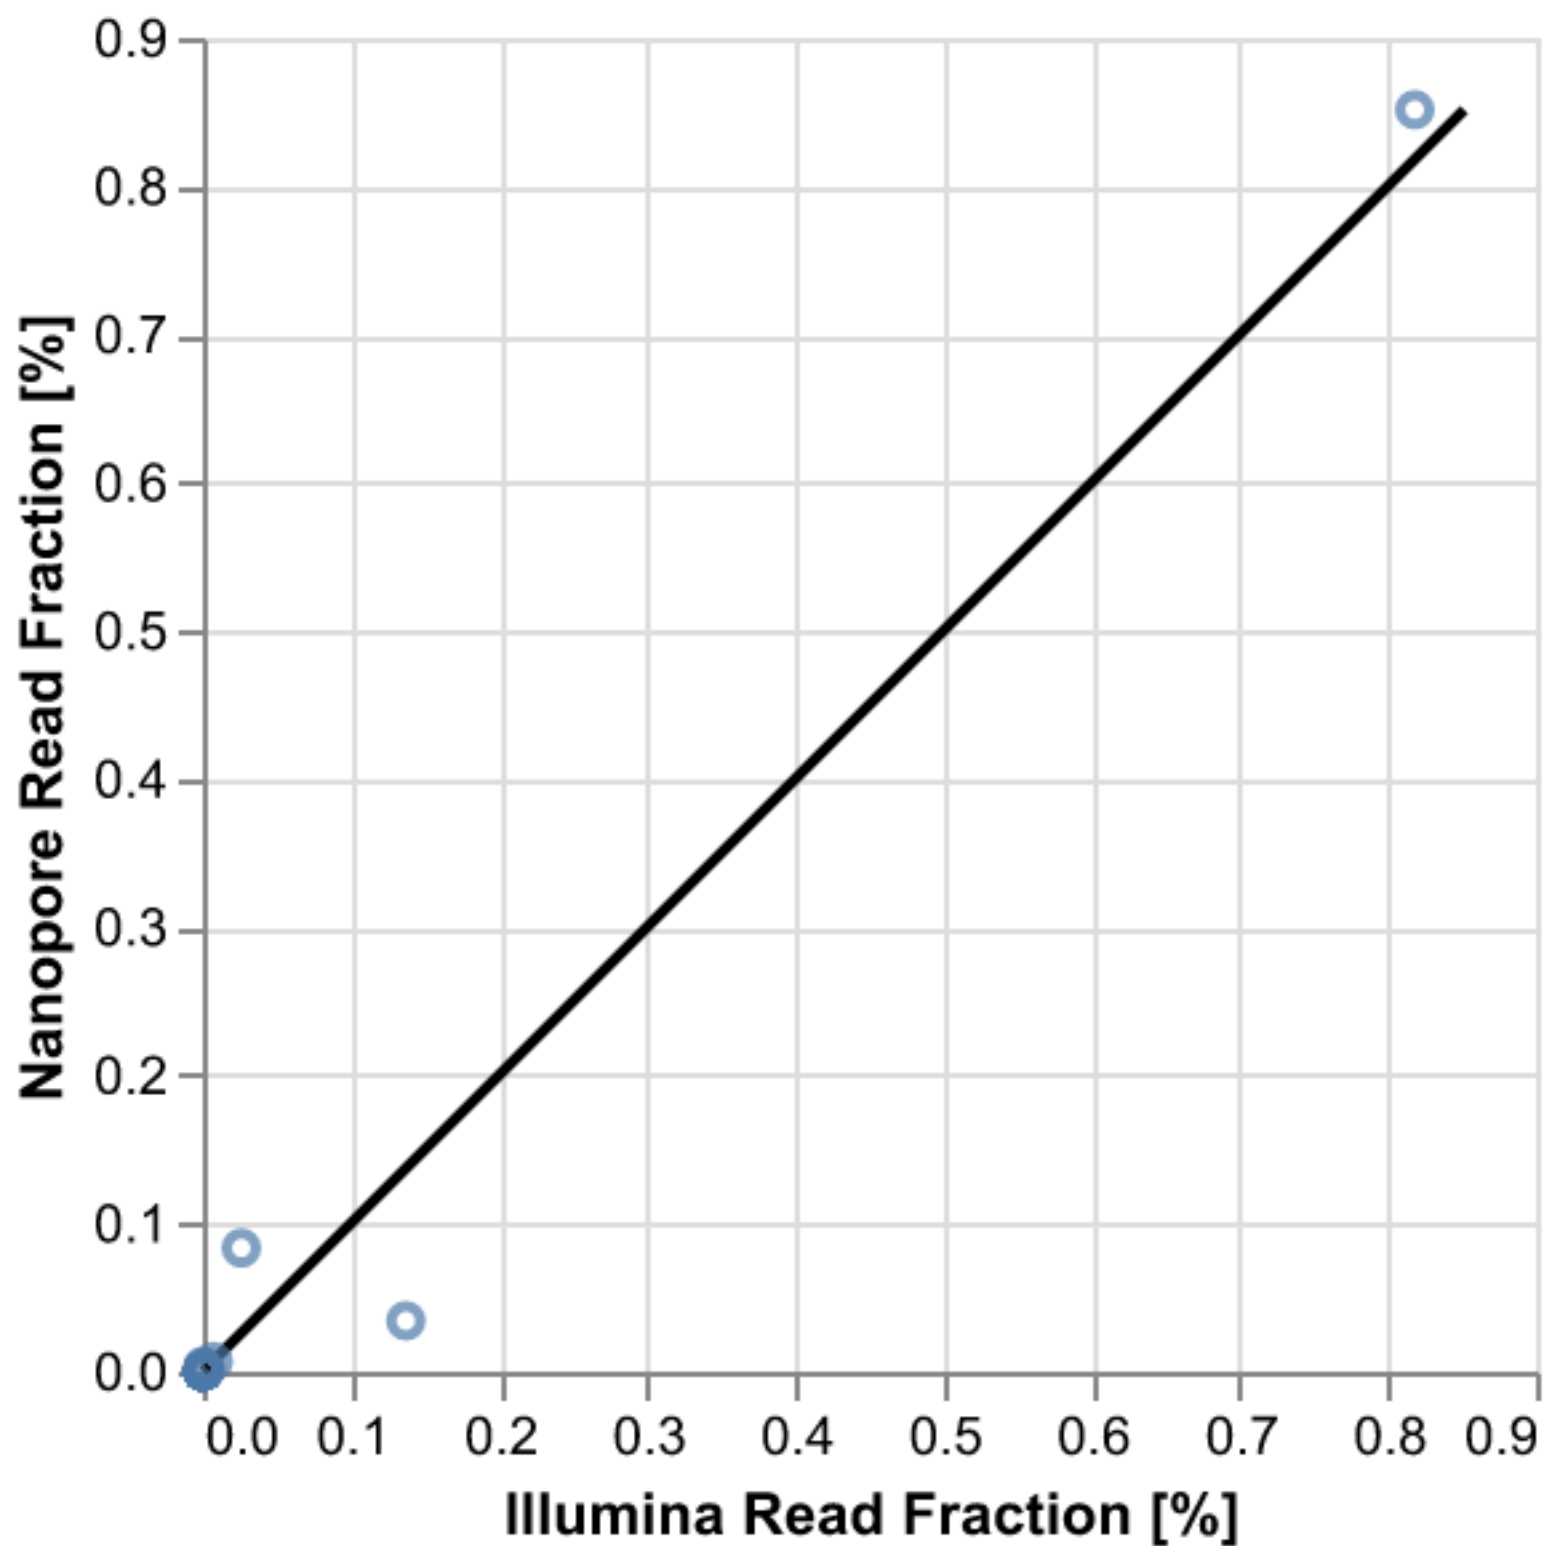

15\_189

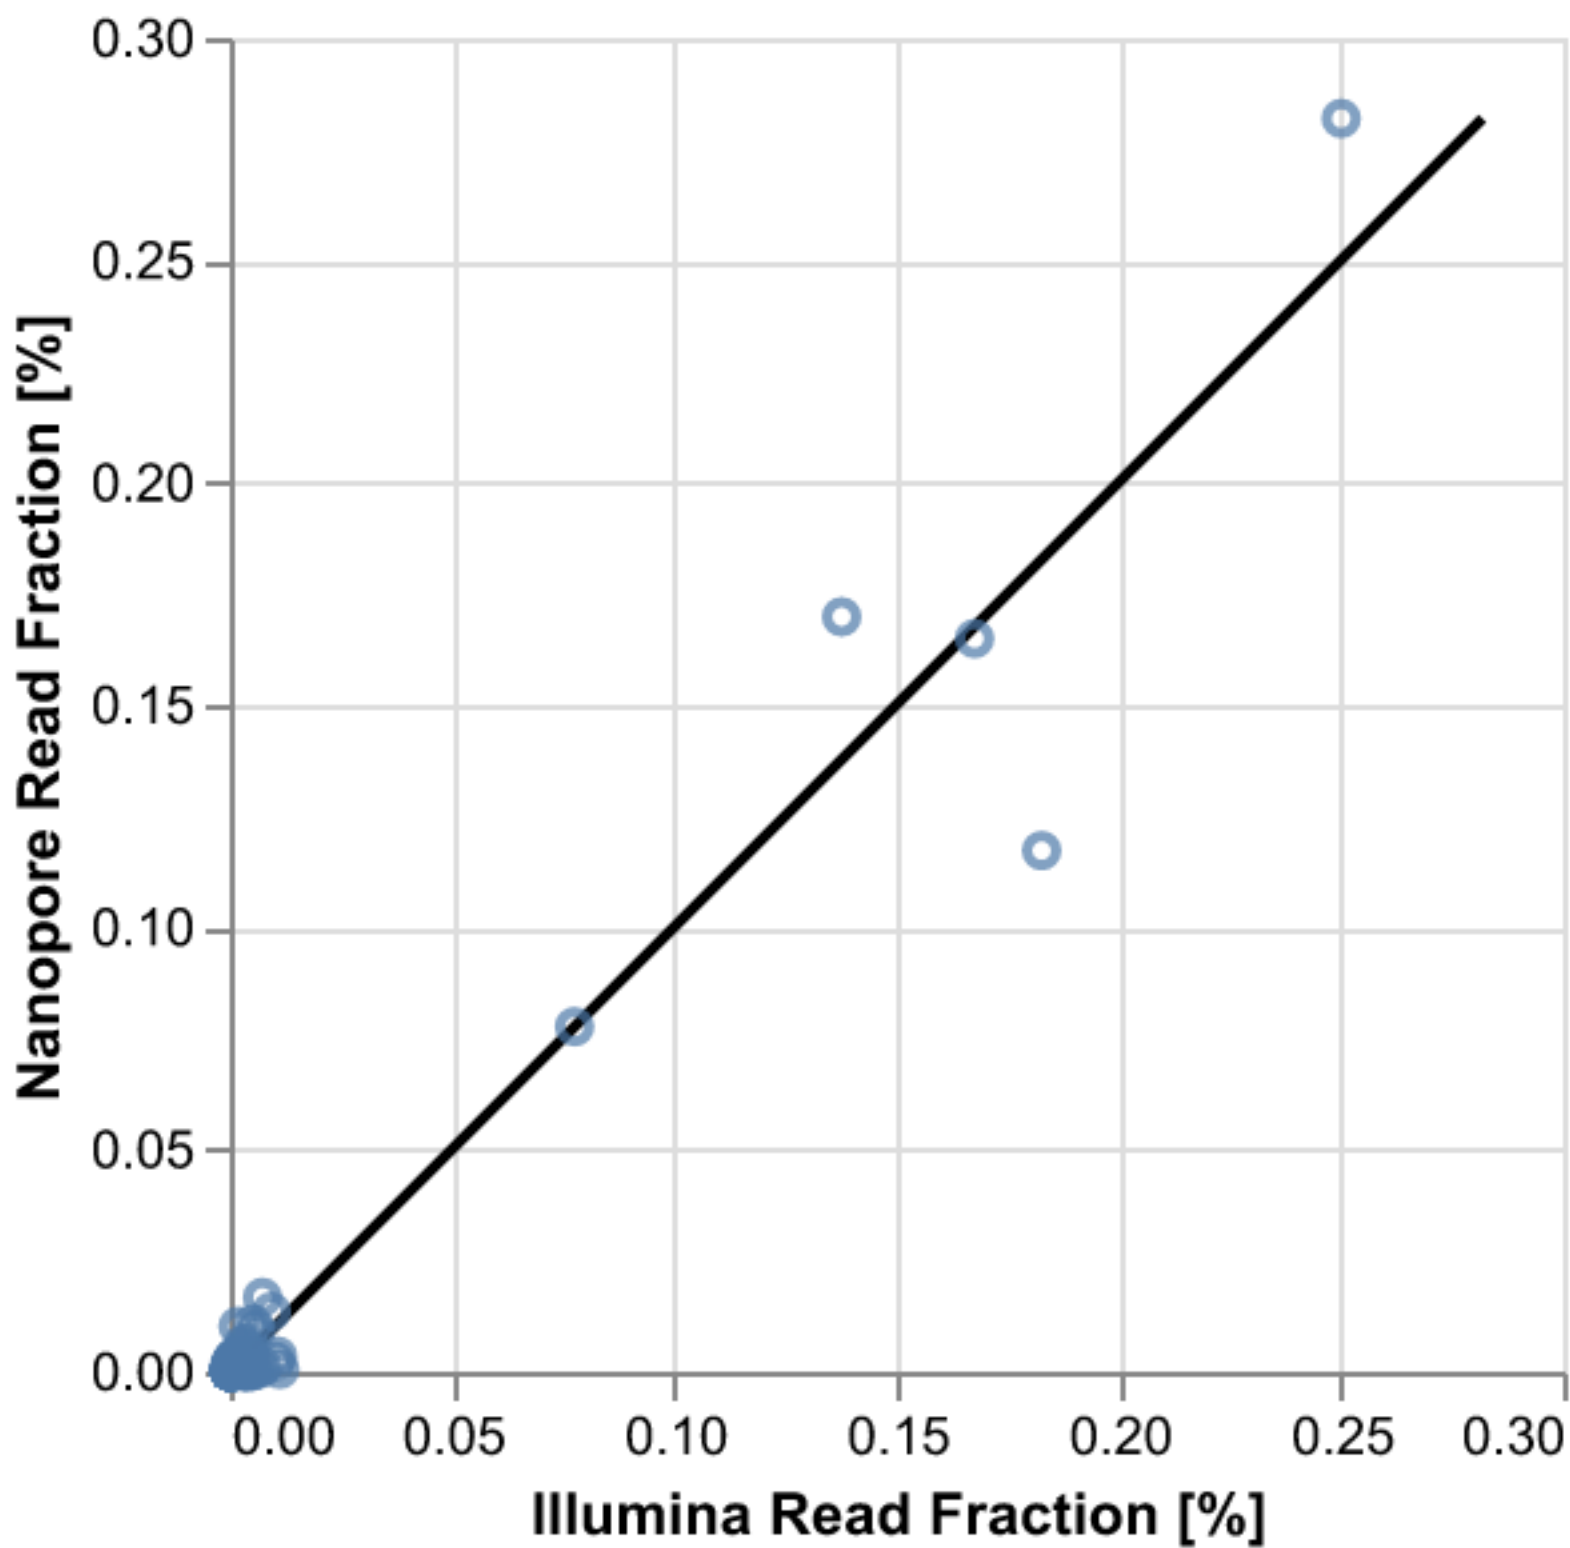

15\_-6

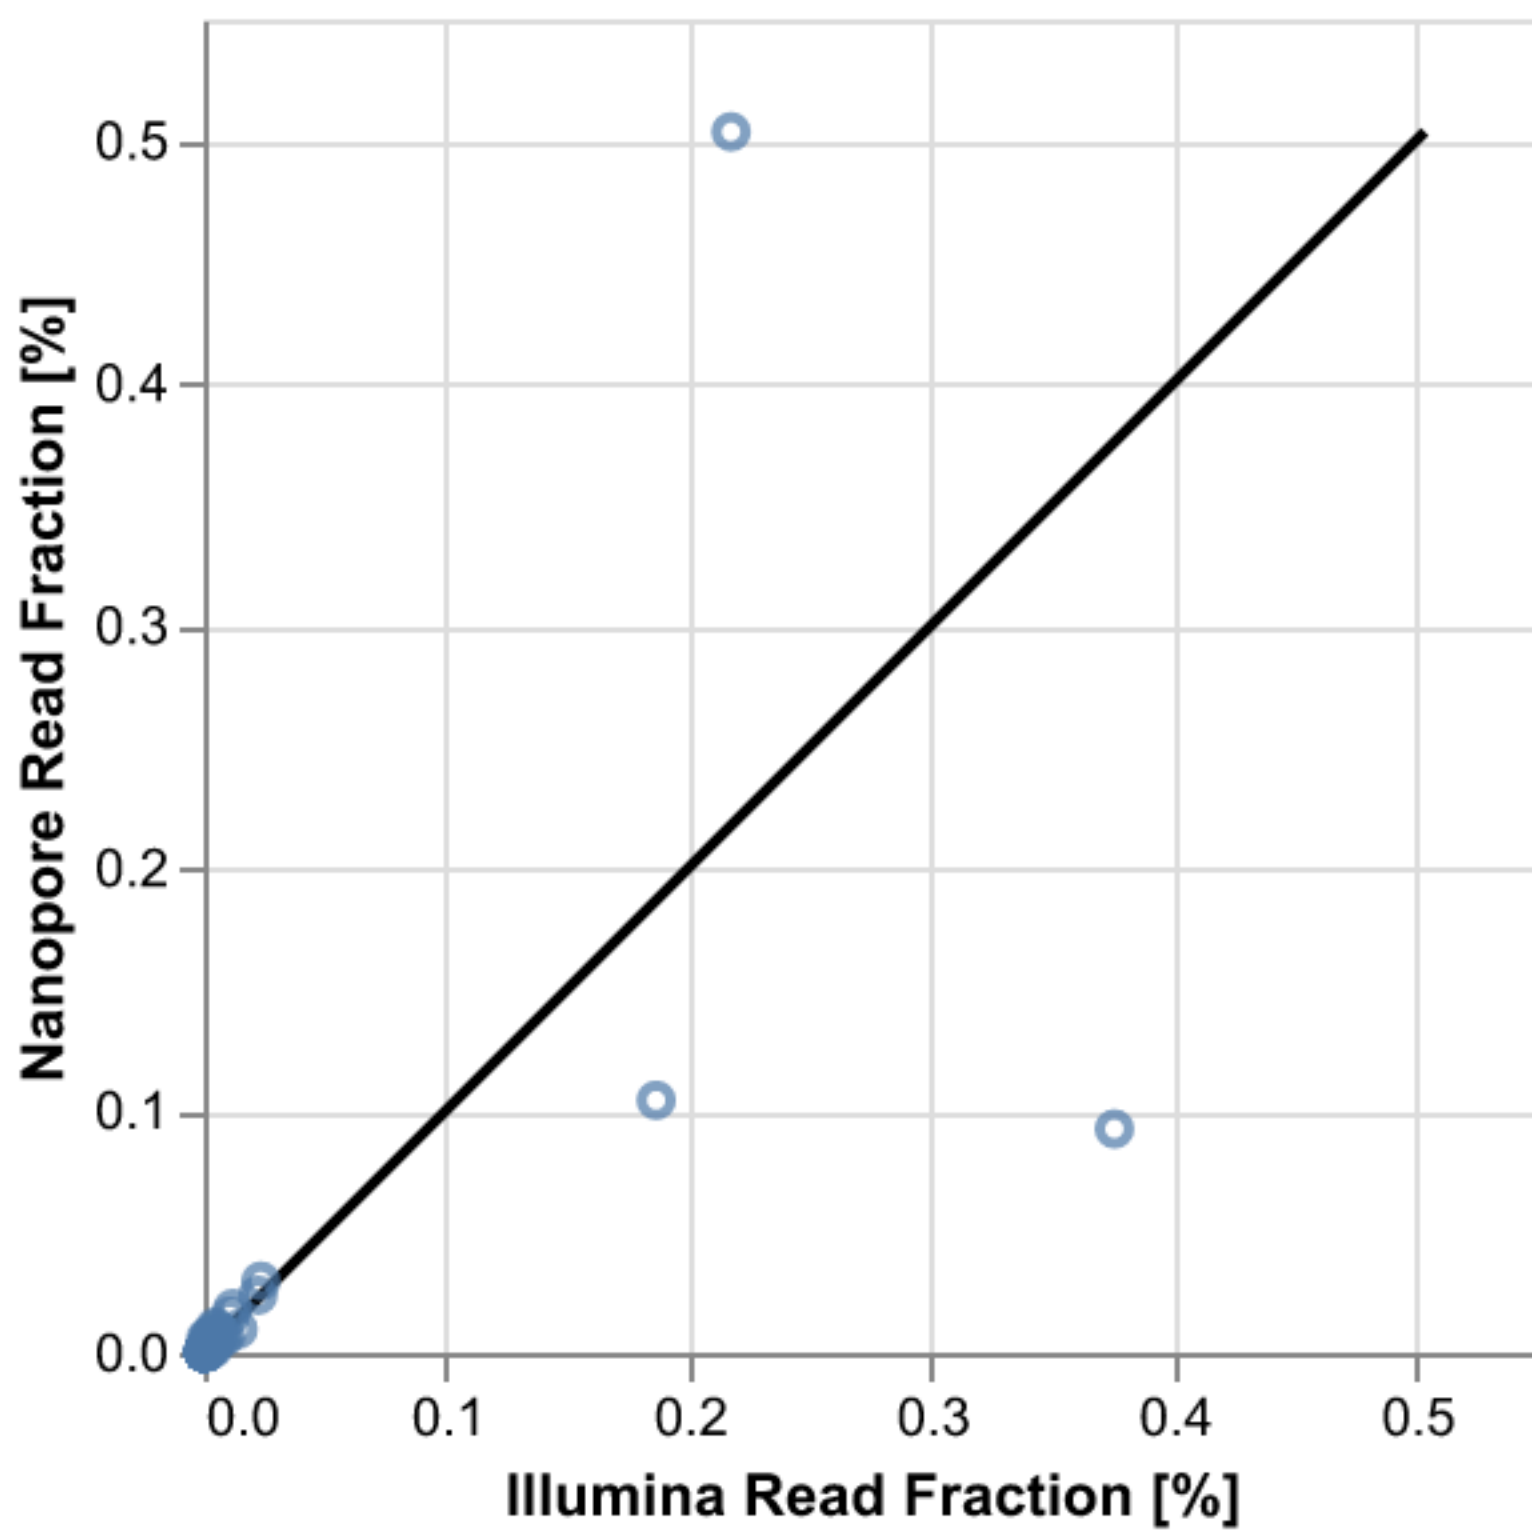

15\_6

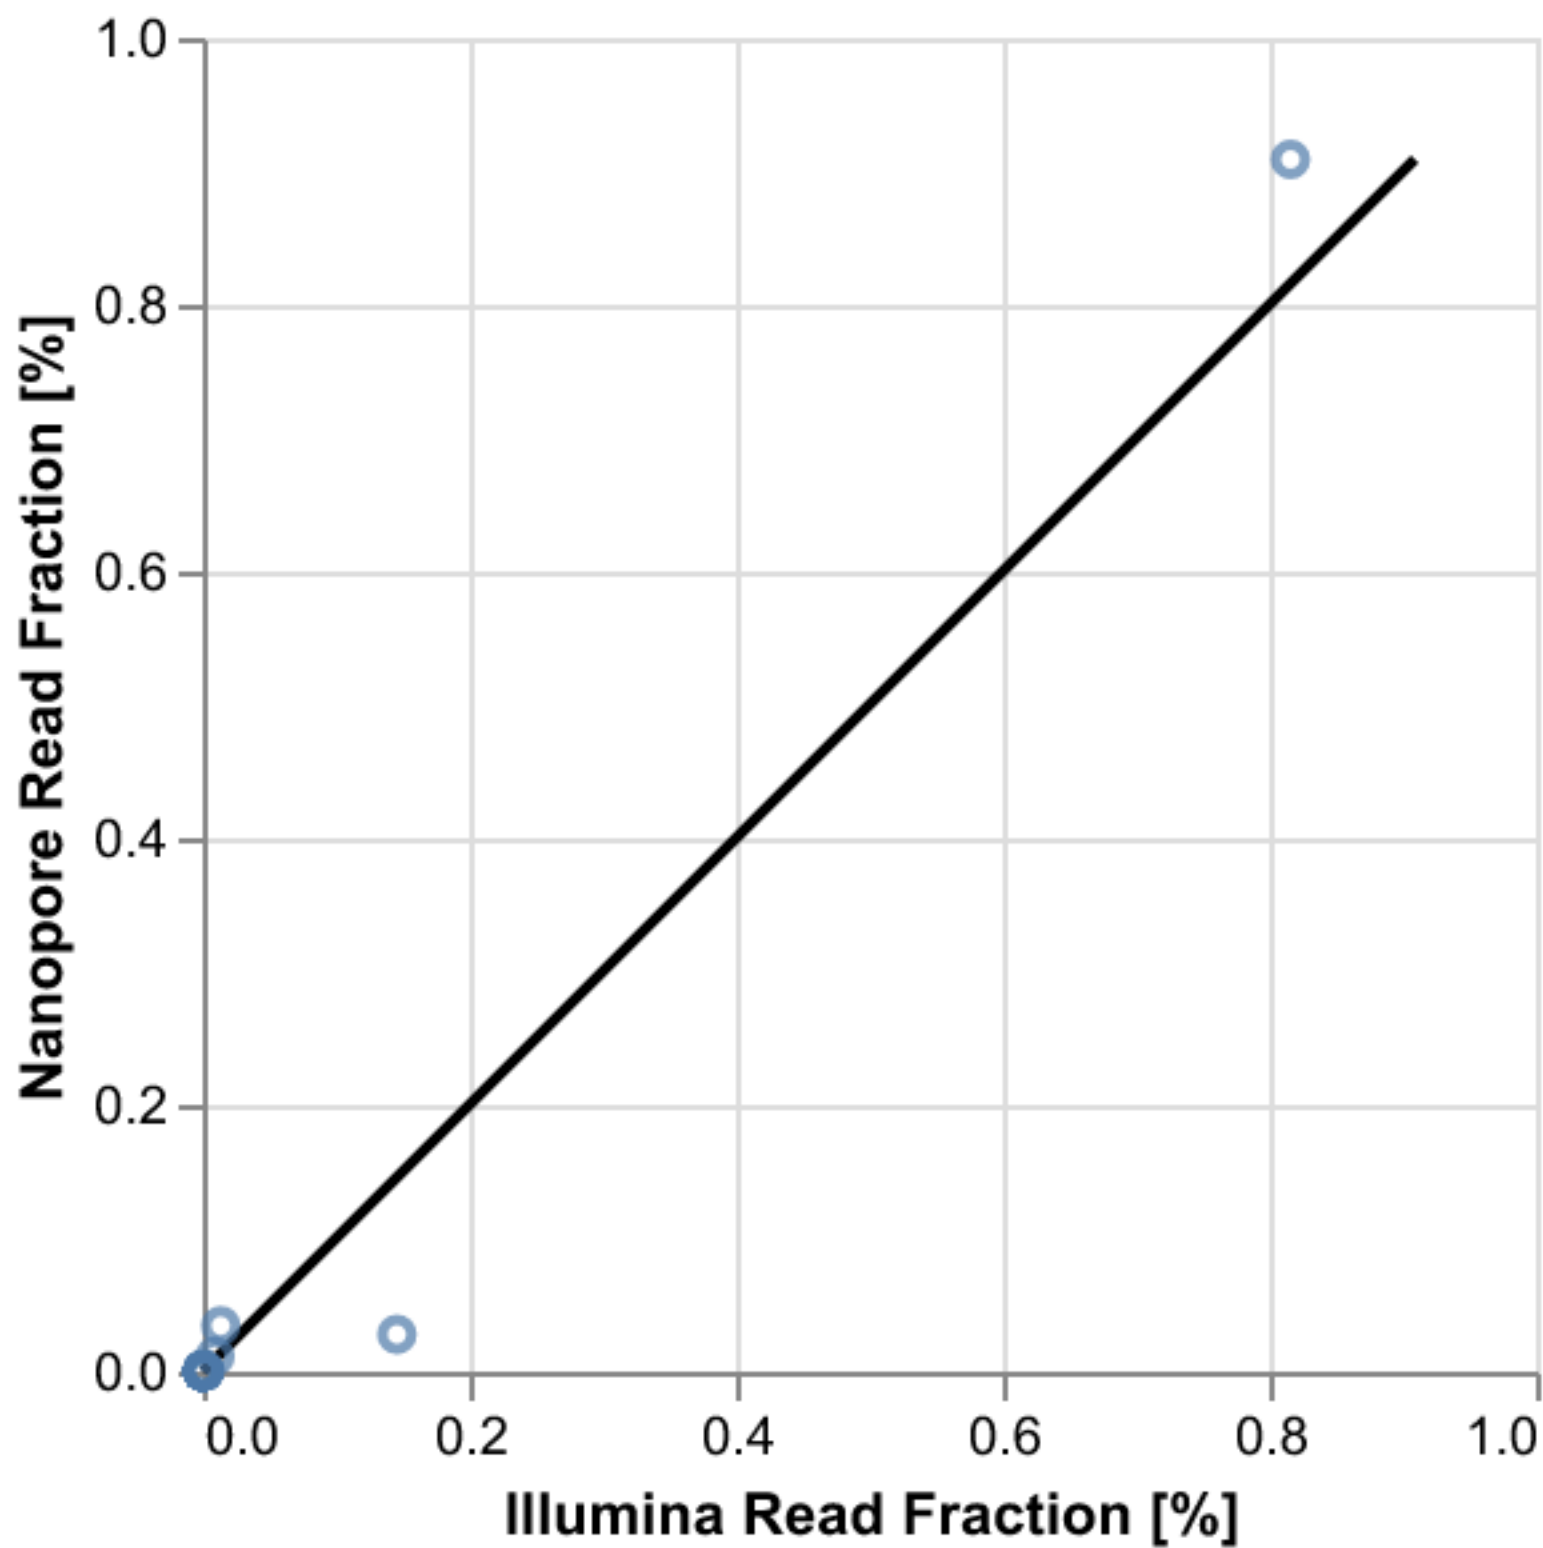



16\_171

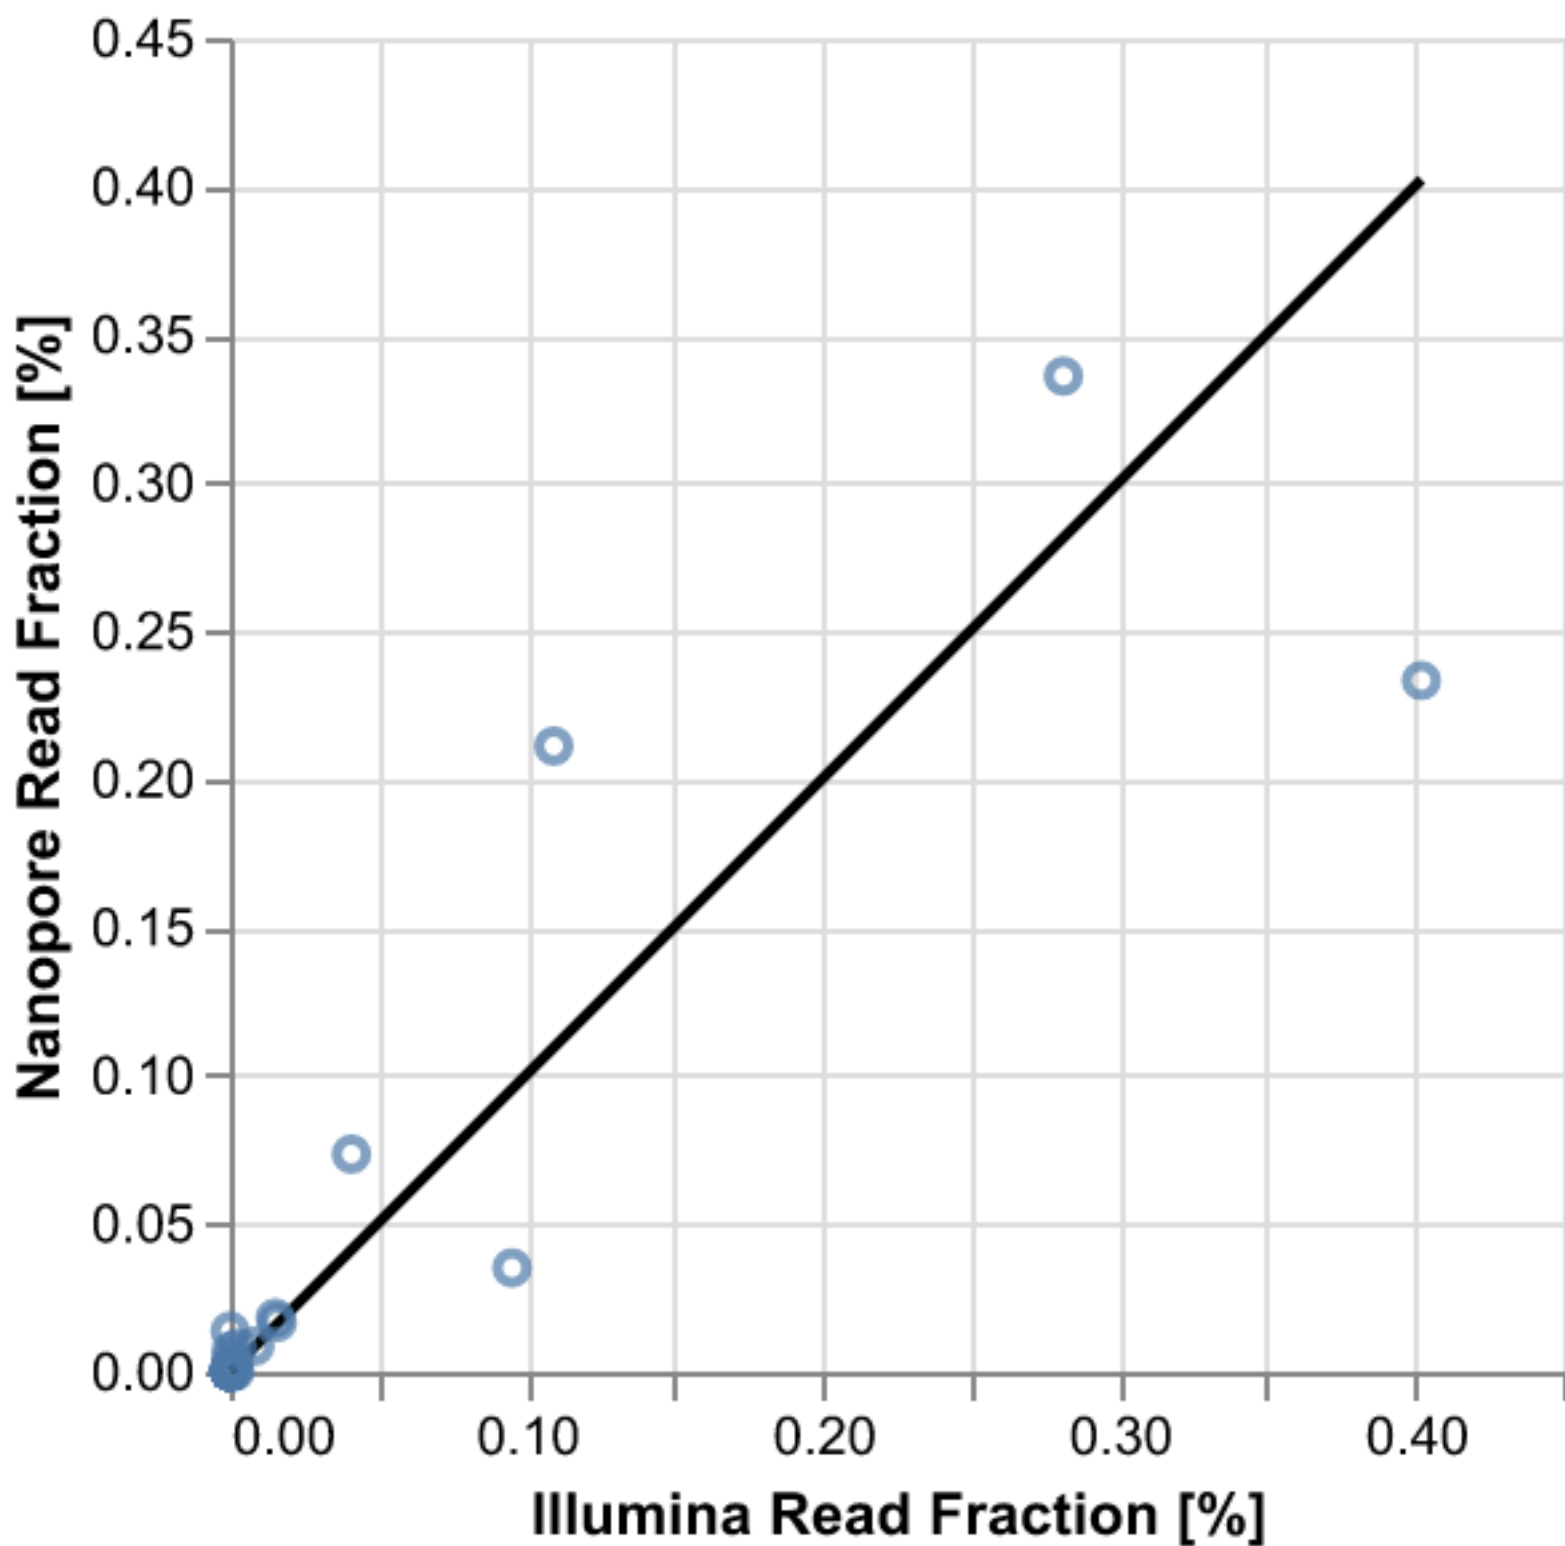

16\_2

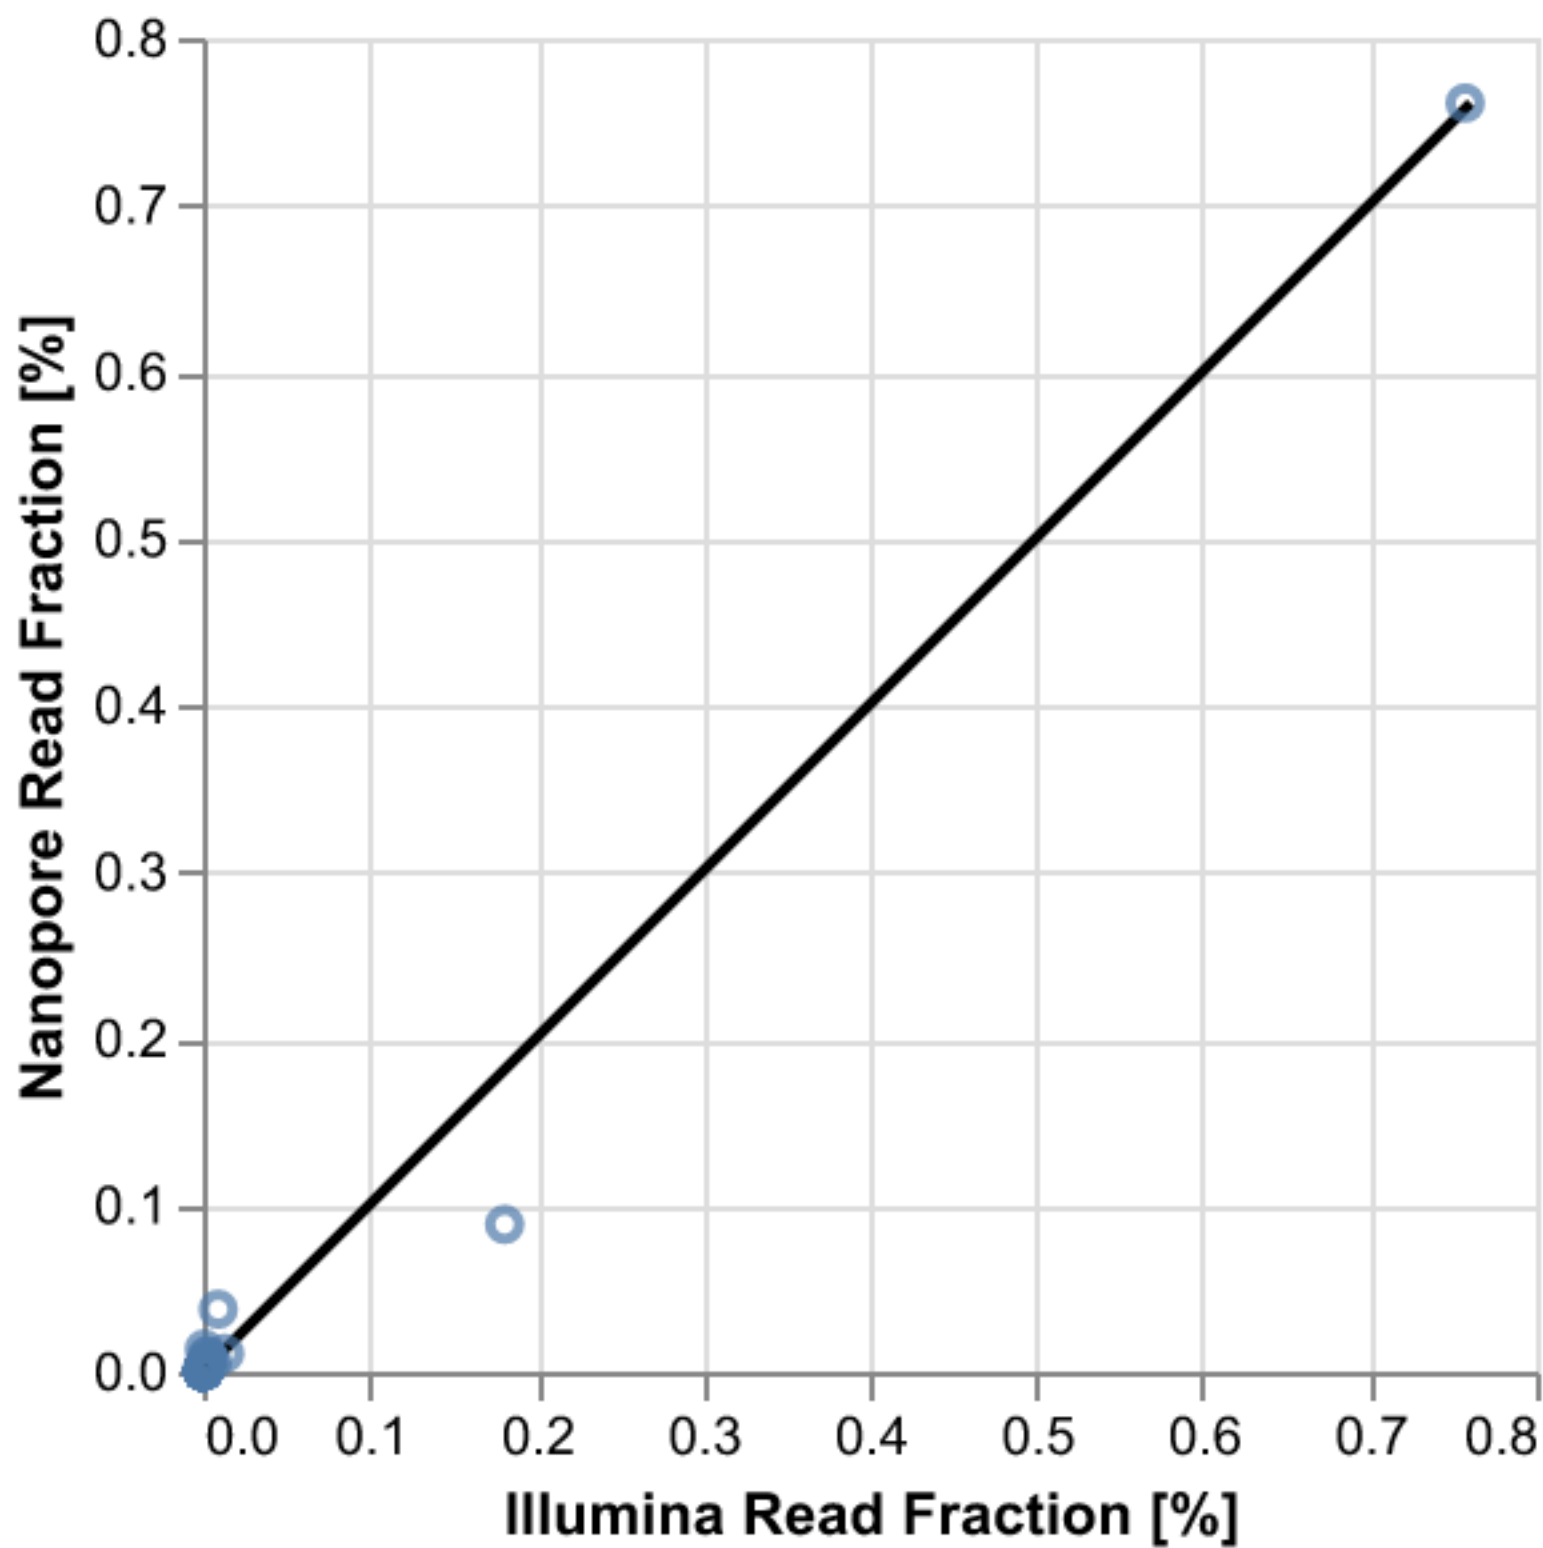



16\_-5

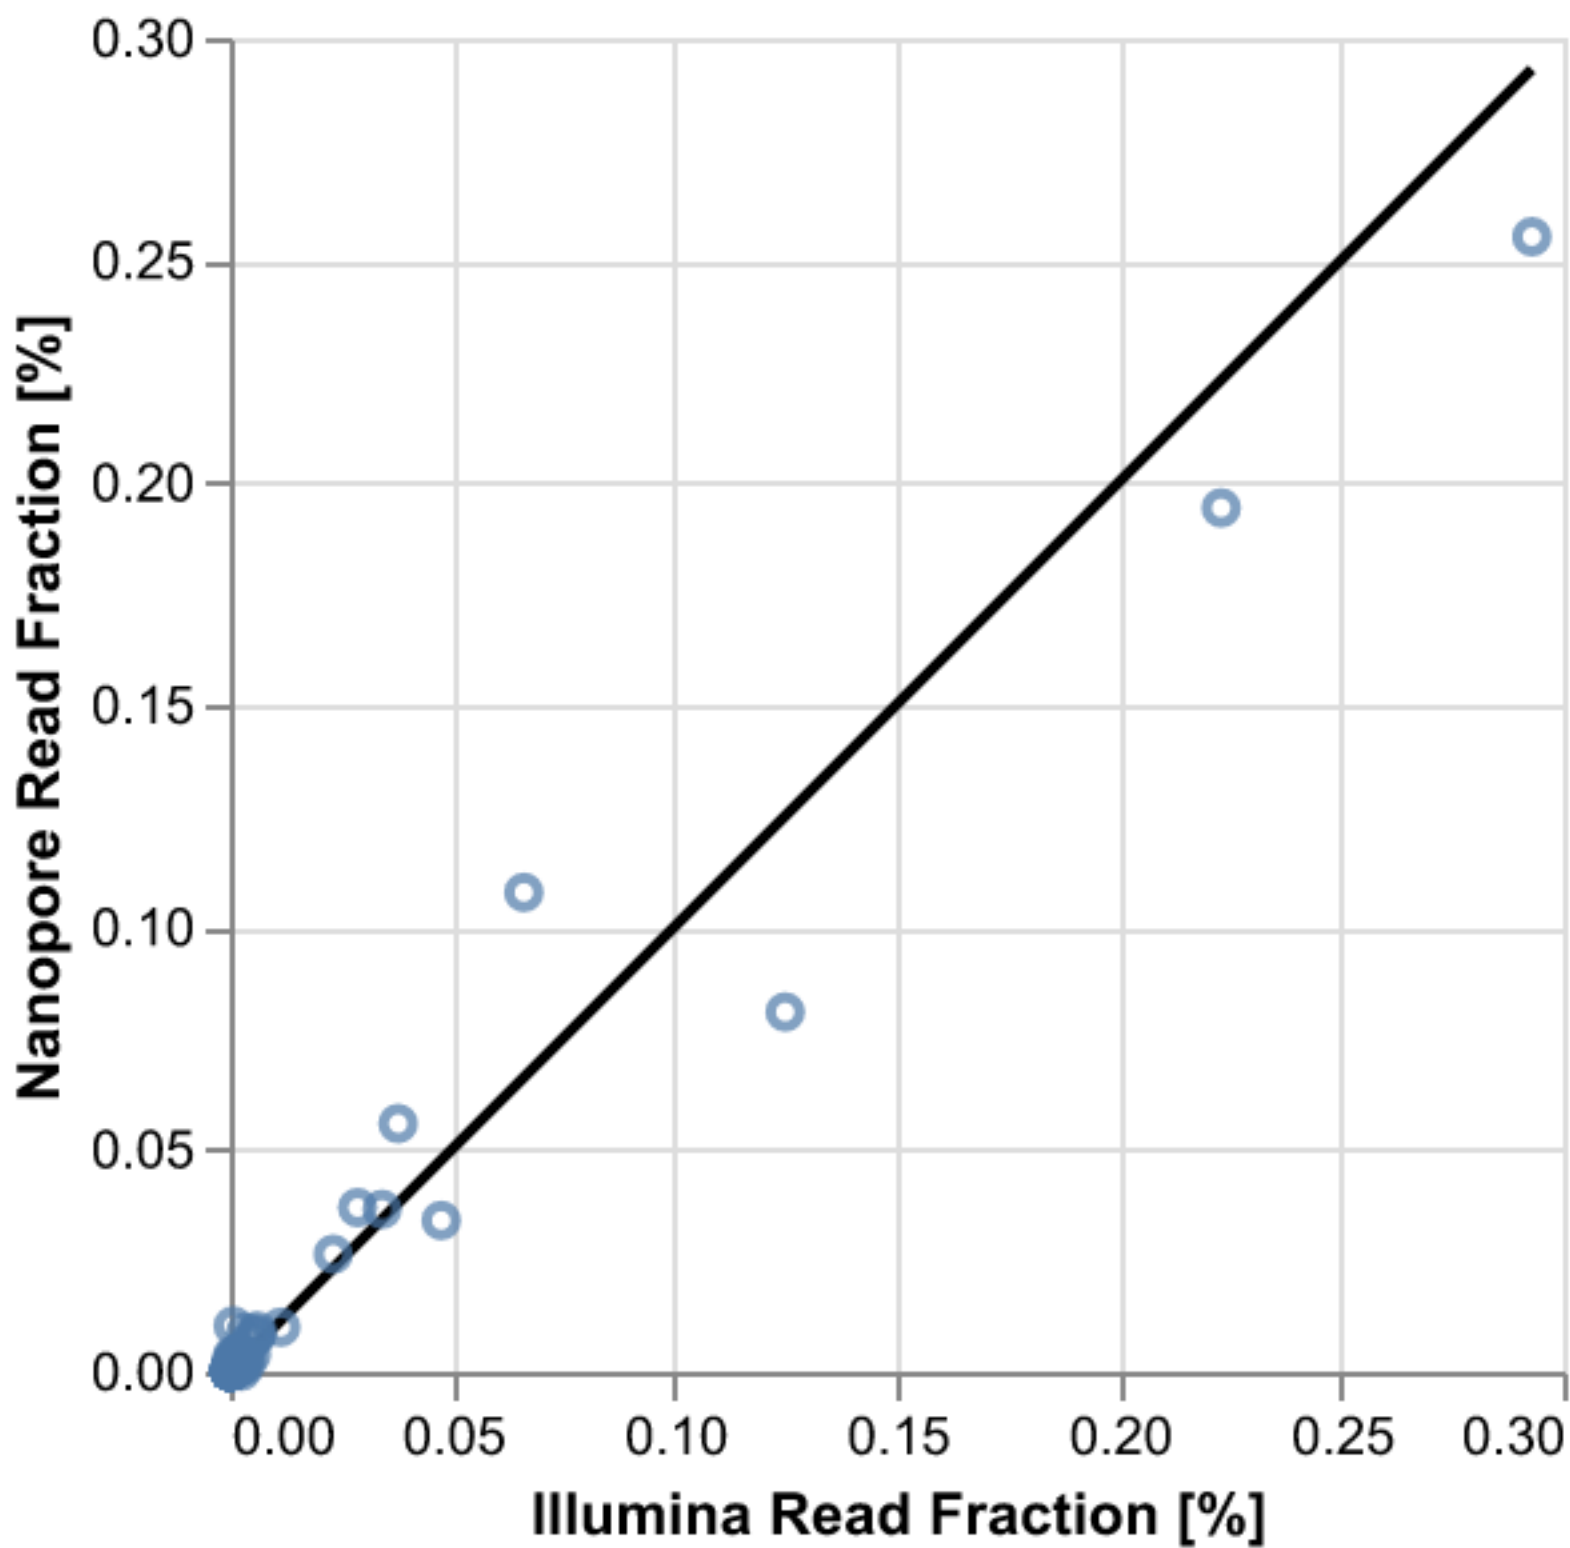

17\_13

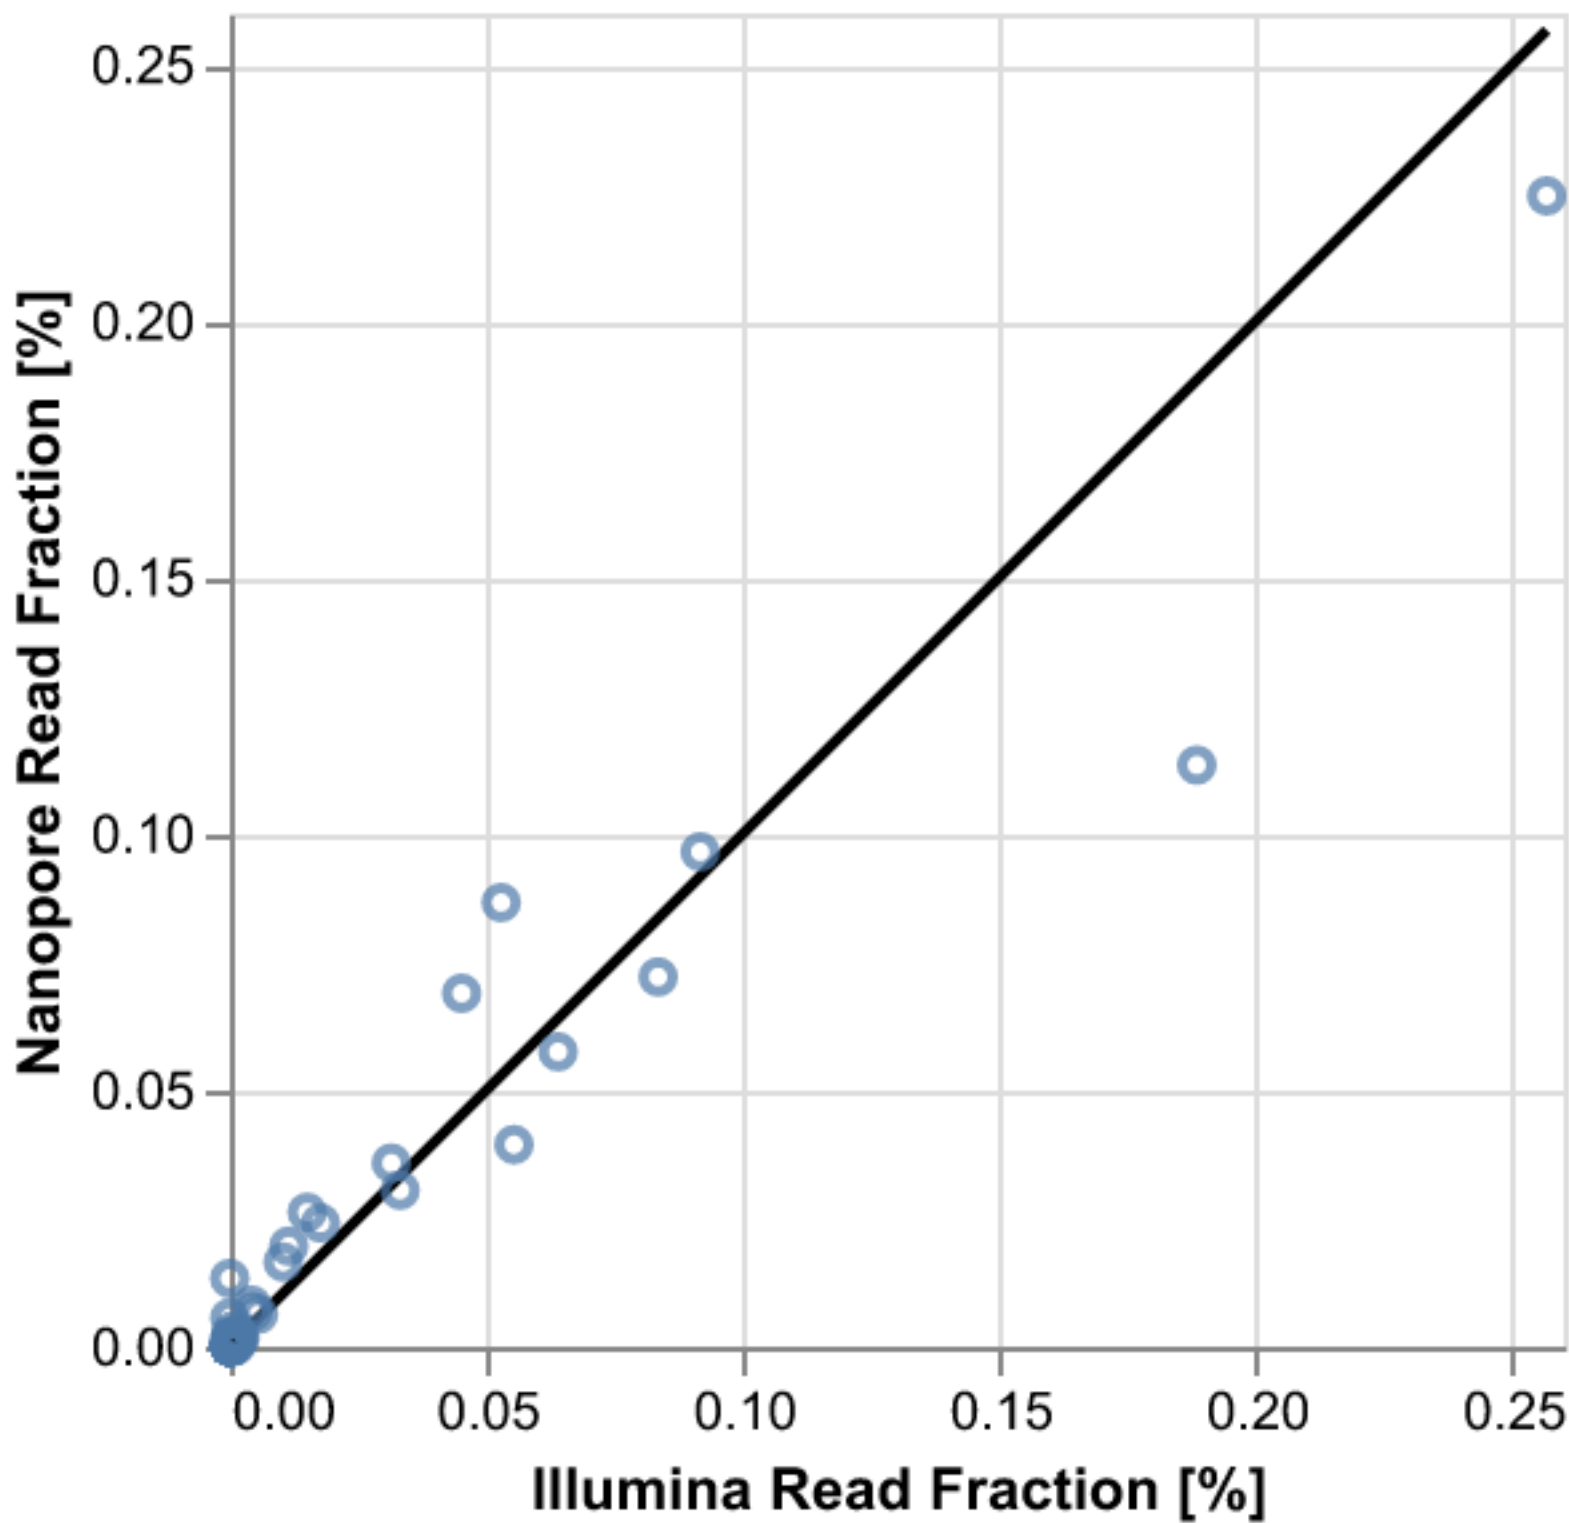

17\_-1

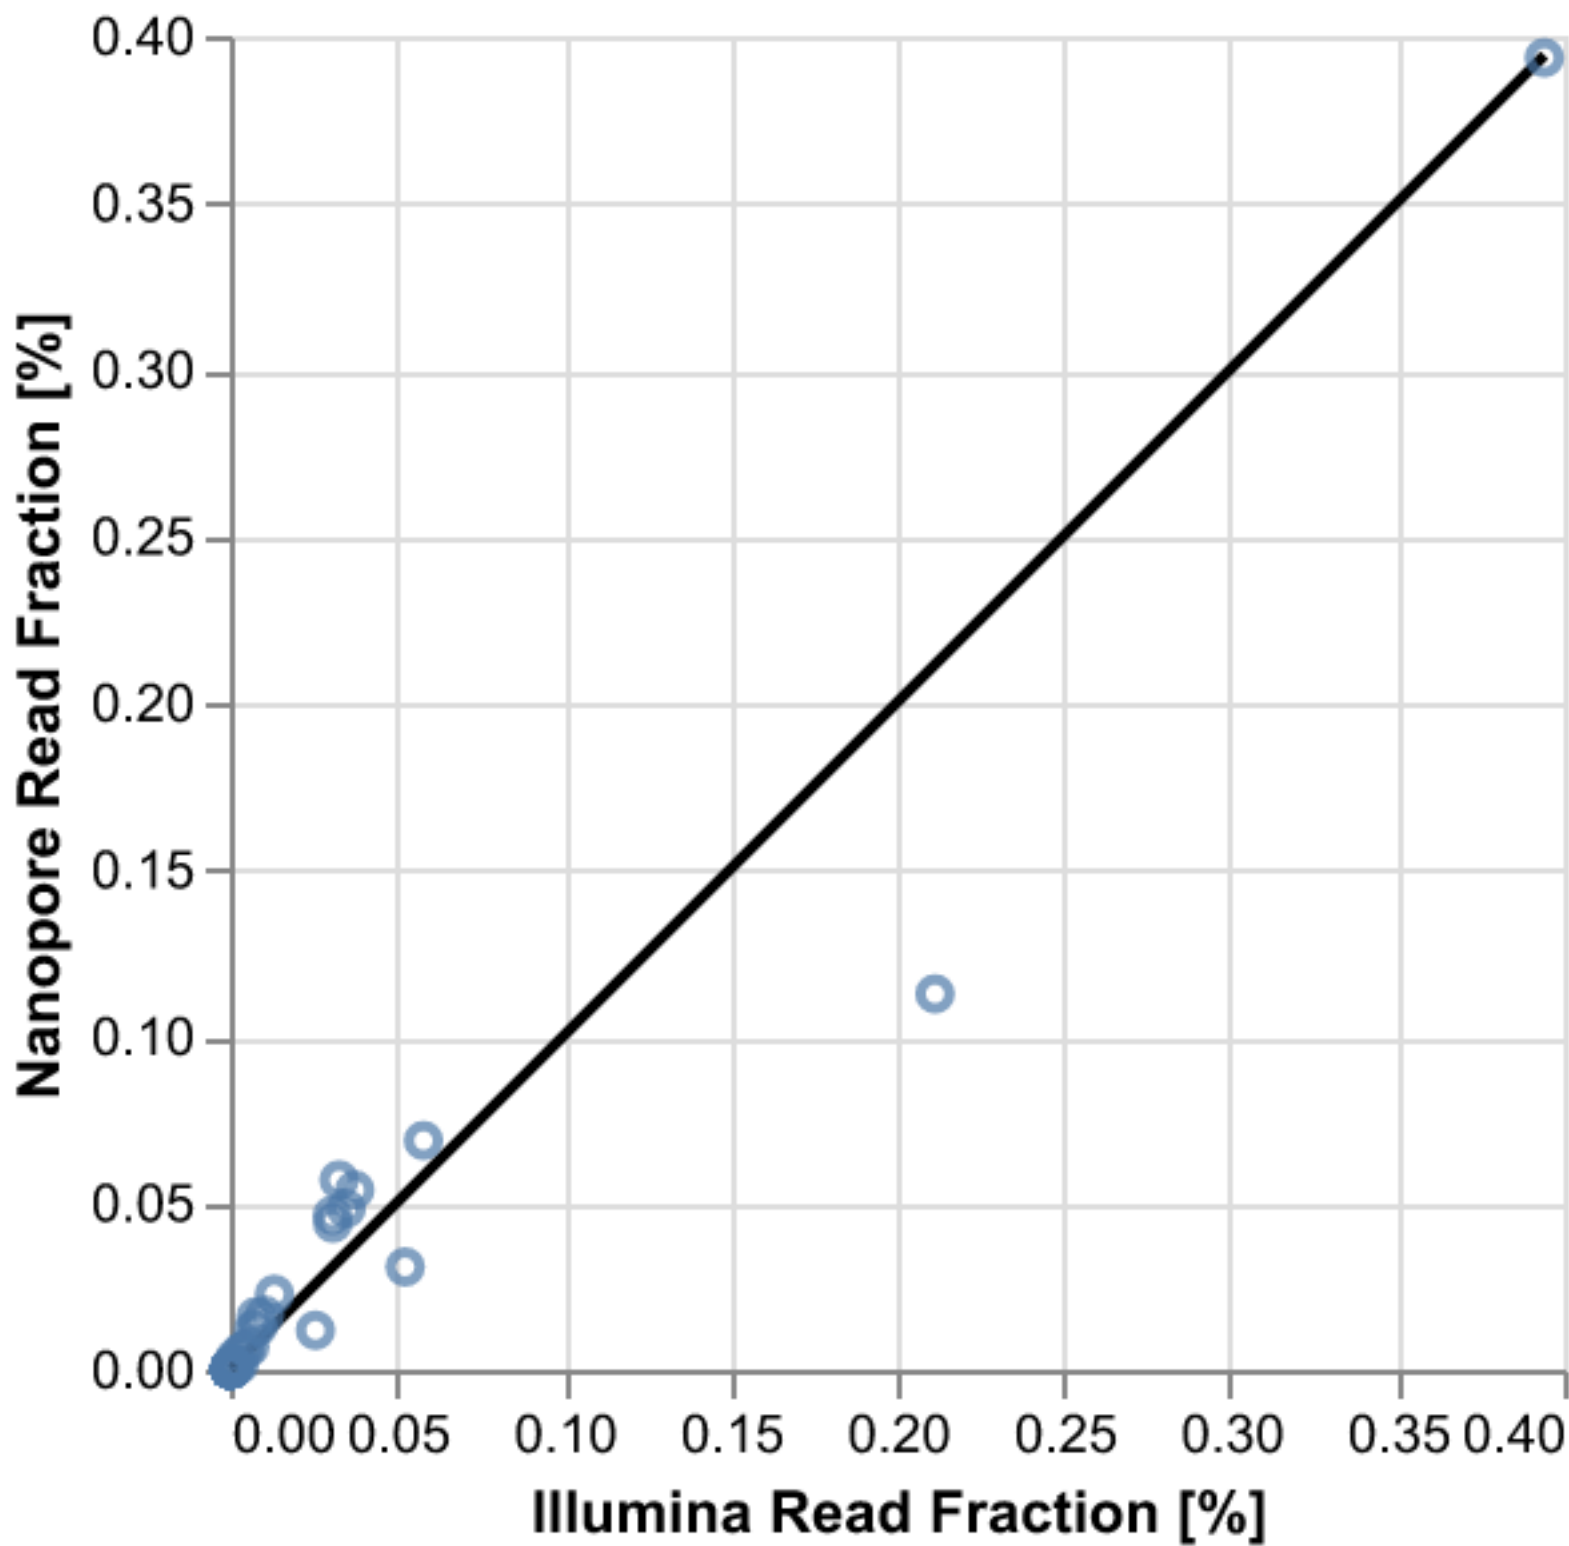

17.2\_154

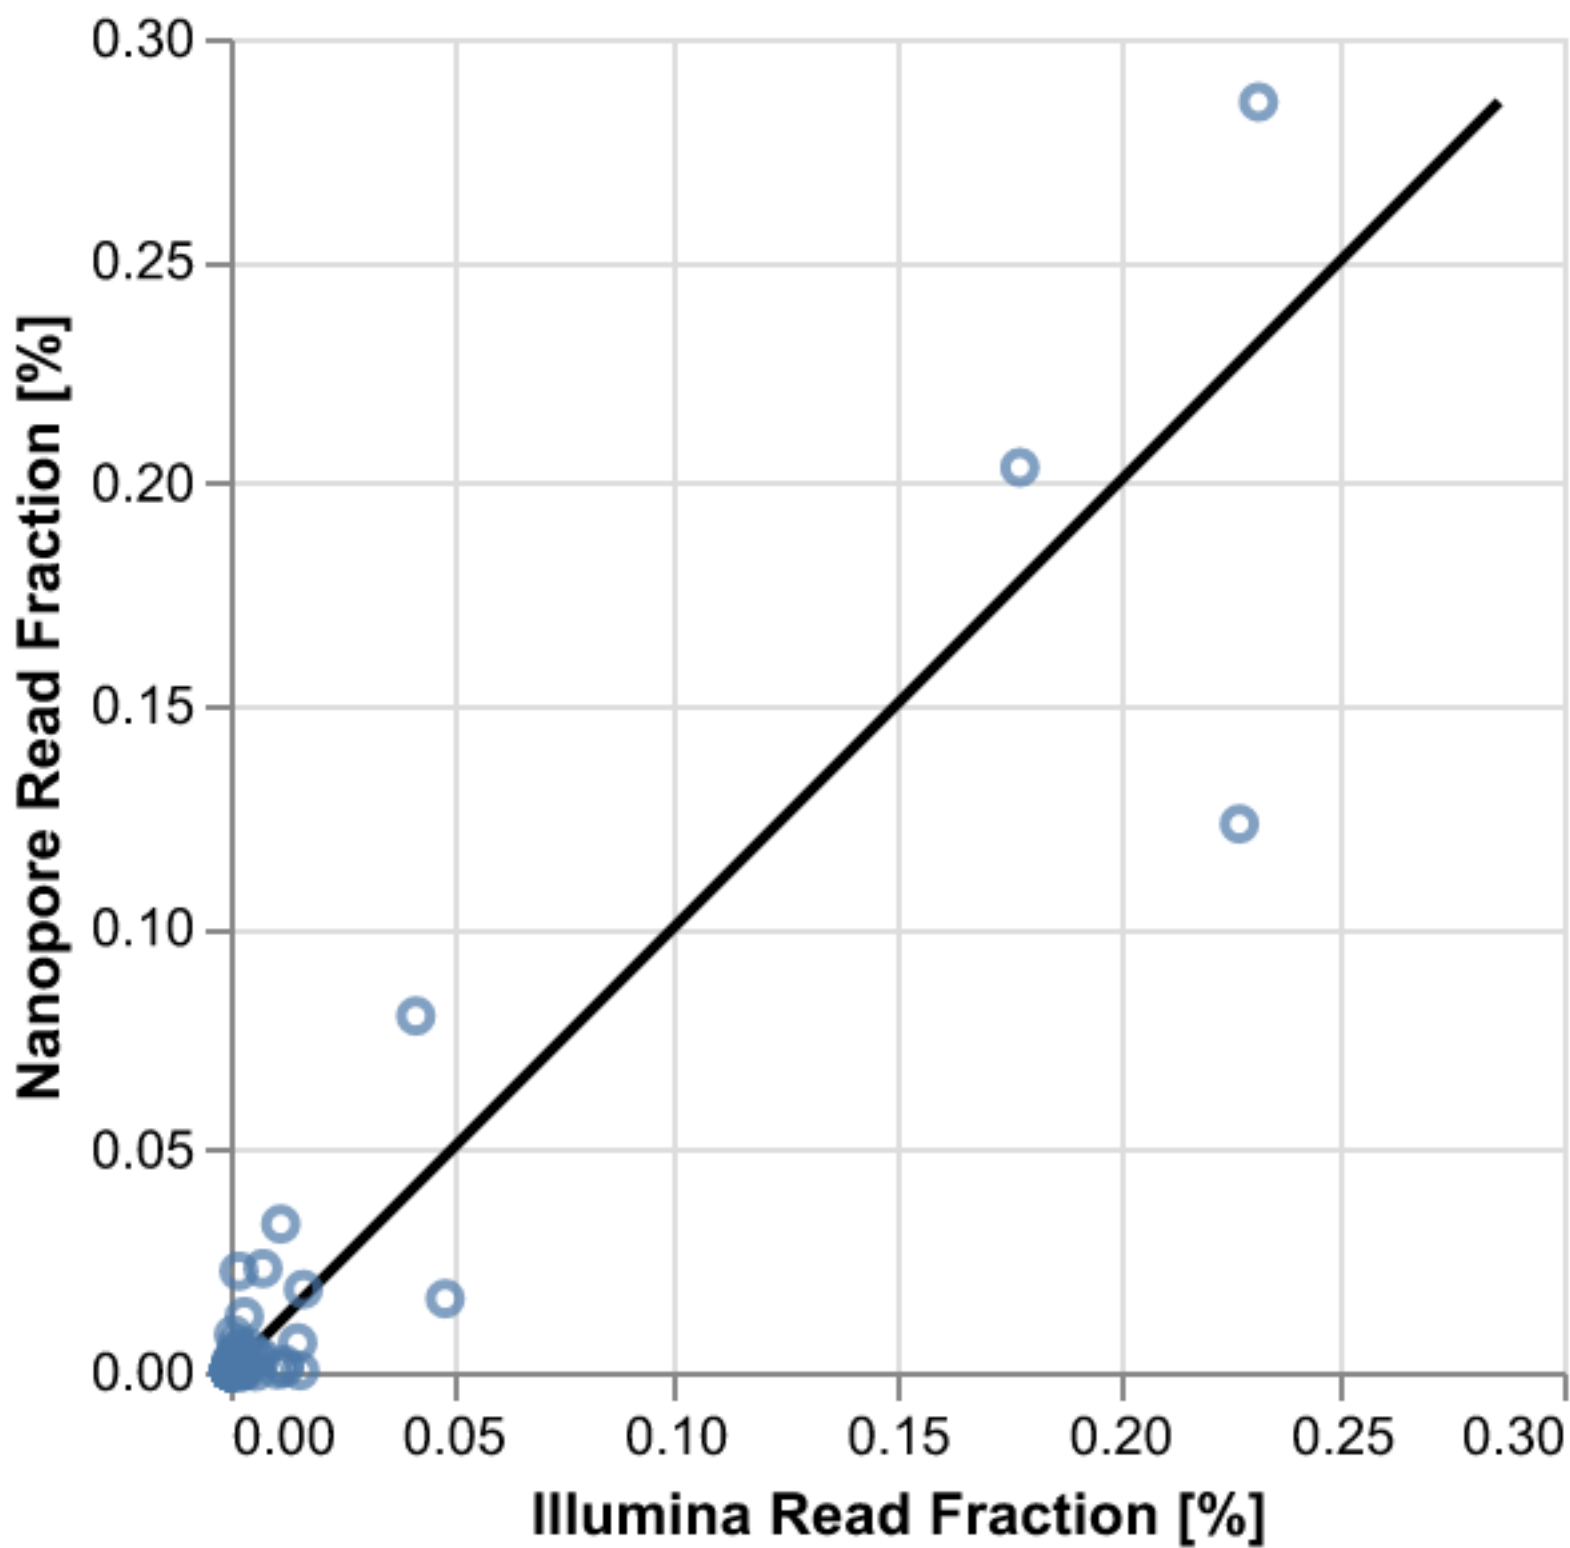

17\_-7

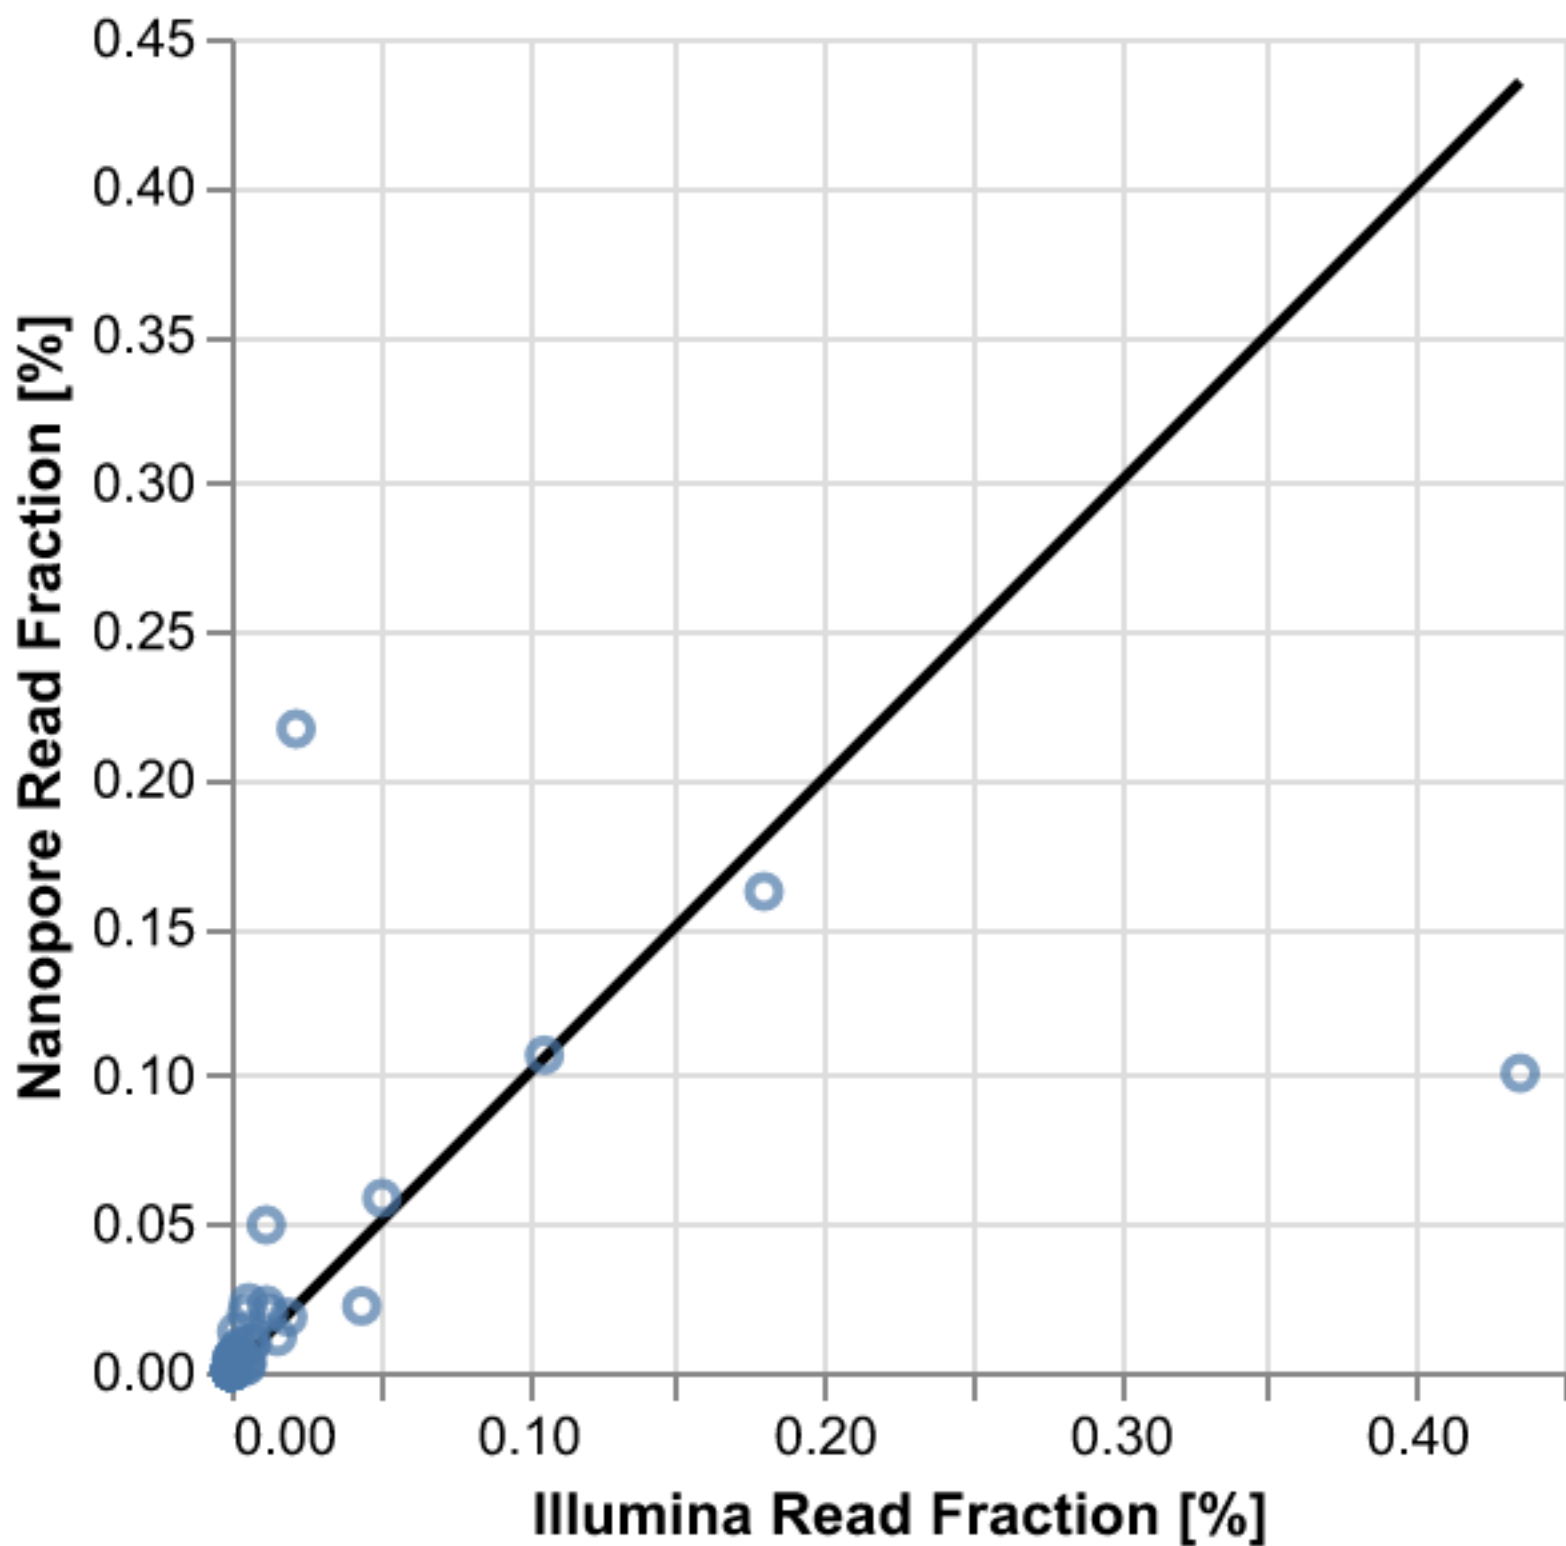

17\_9

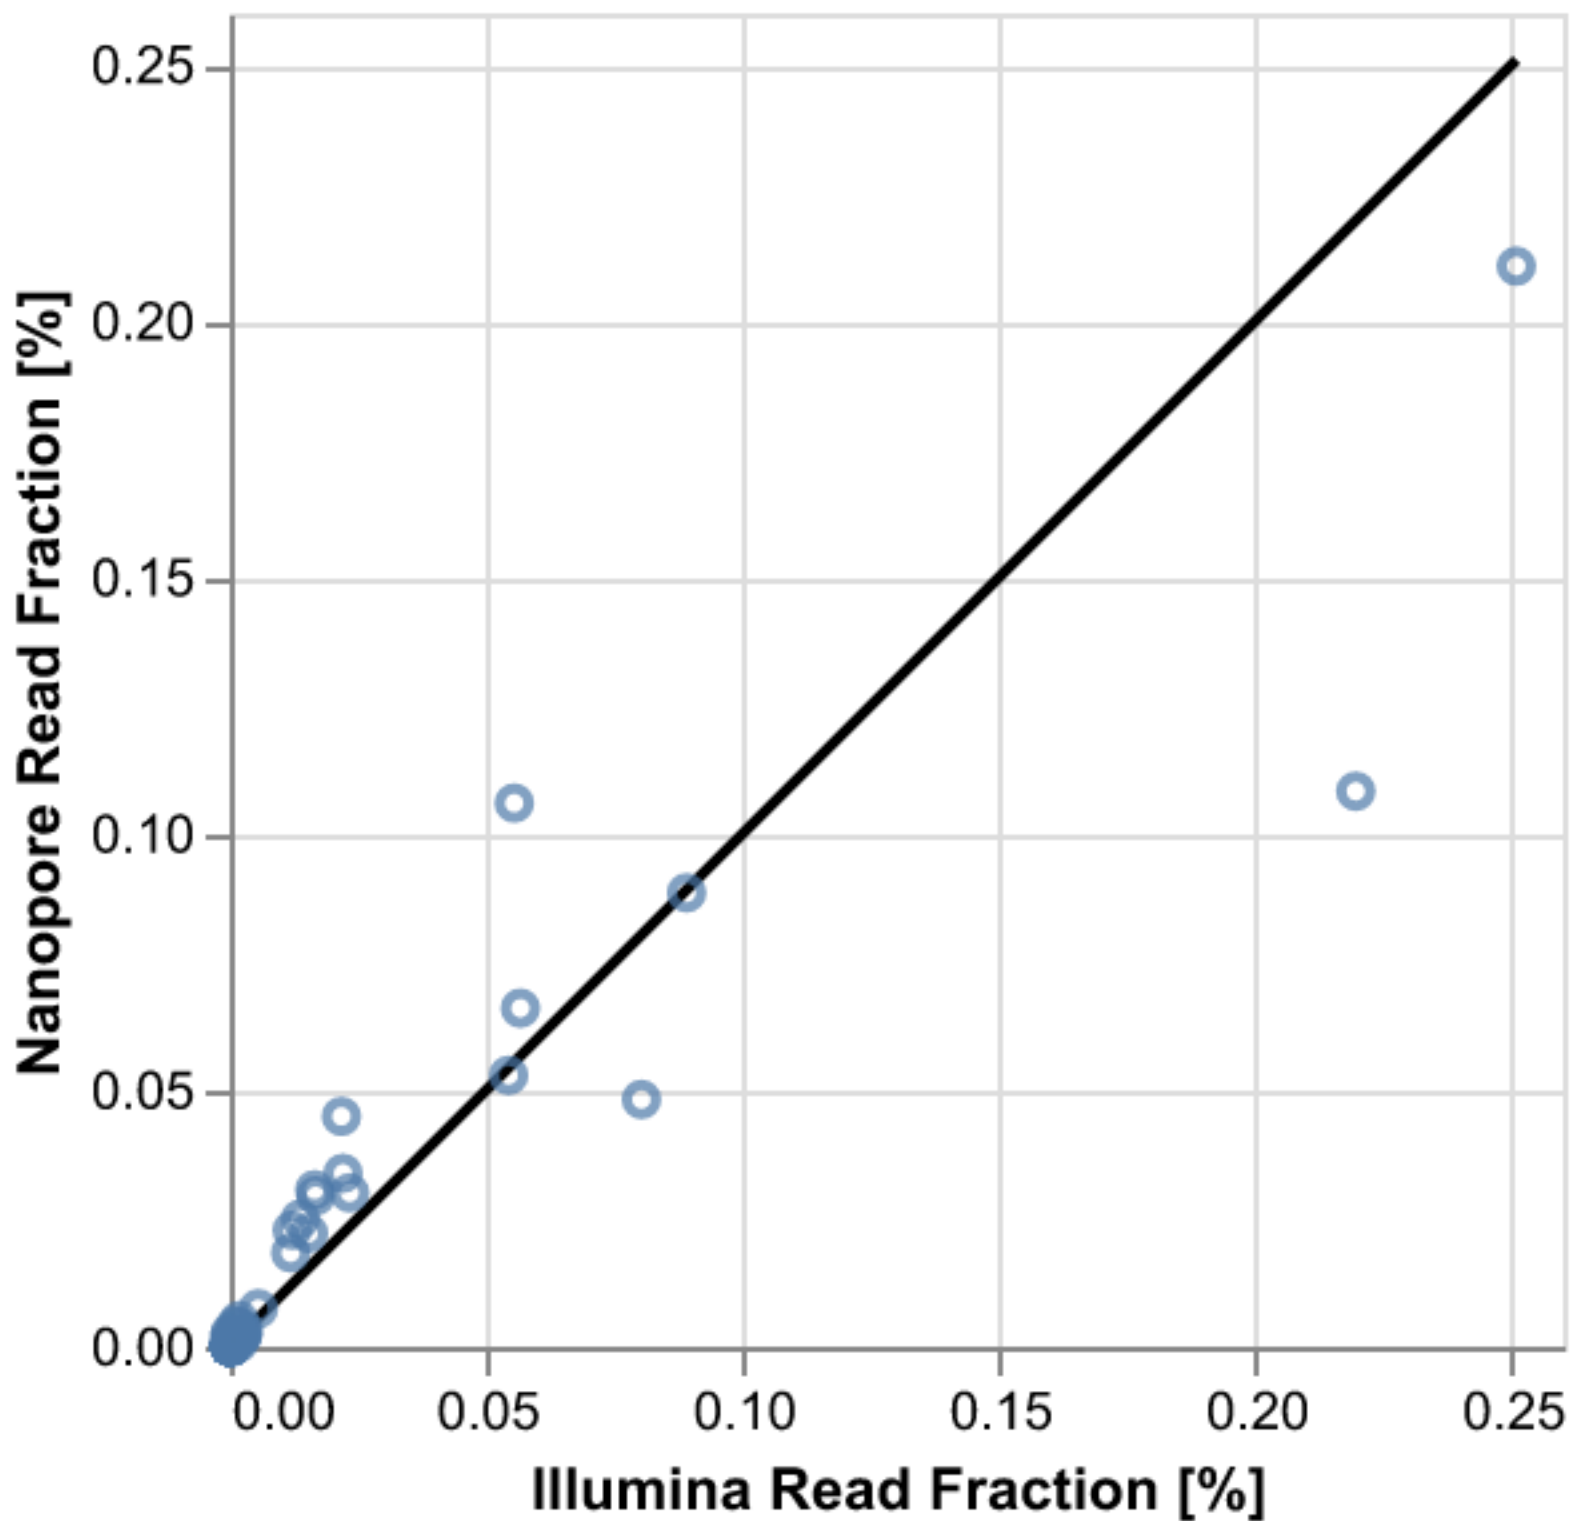

18\_13

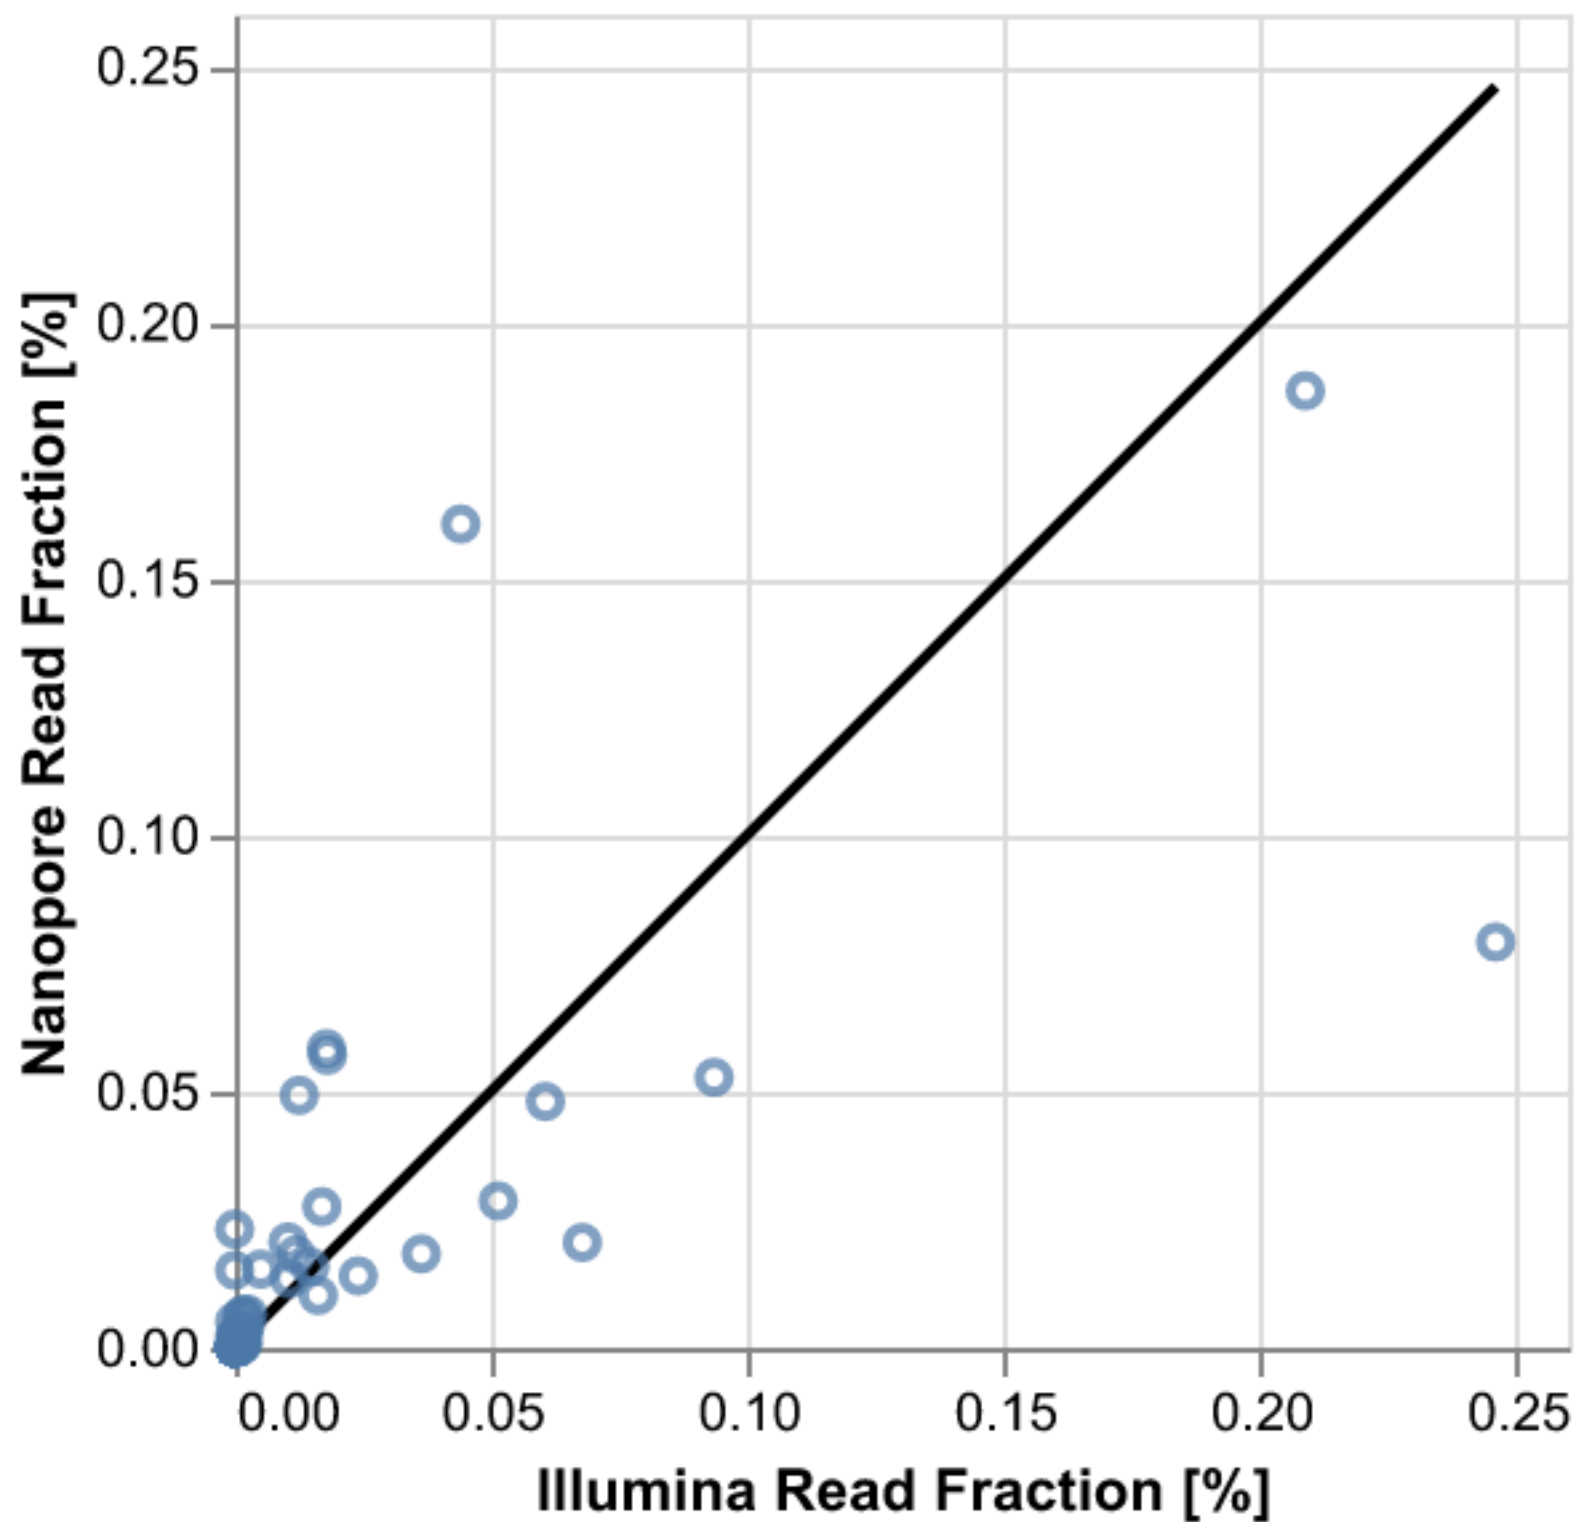

18.2\_16

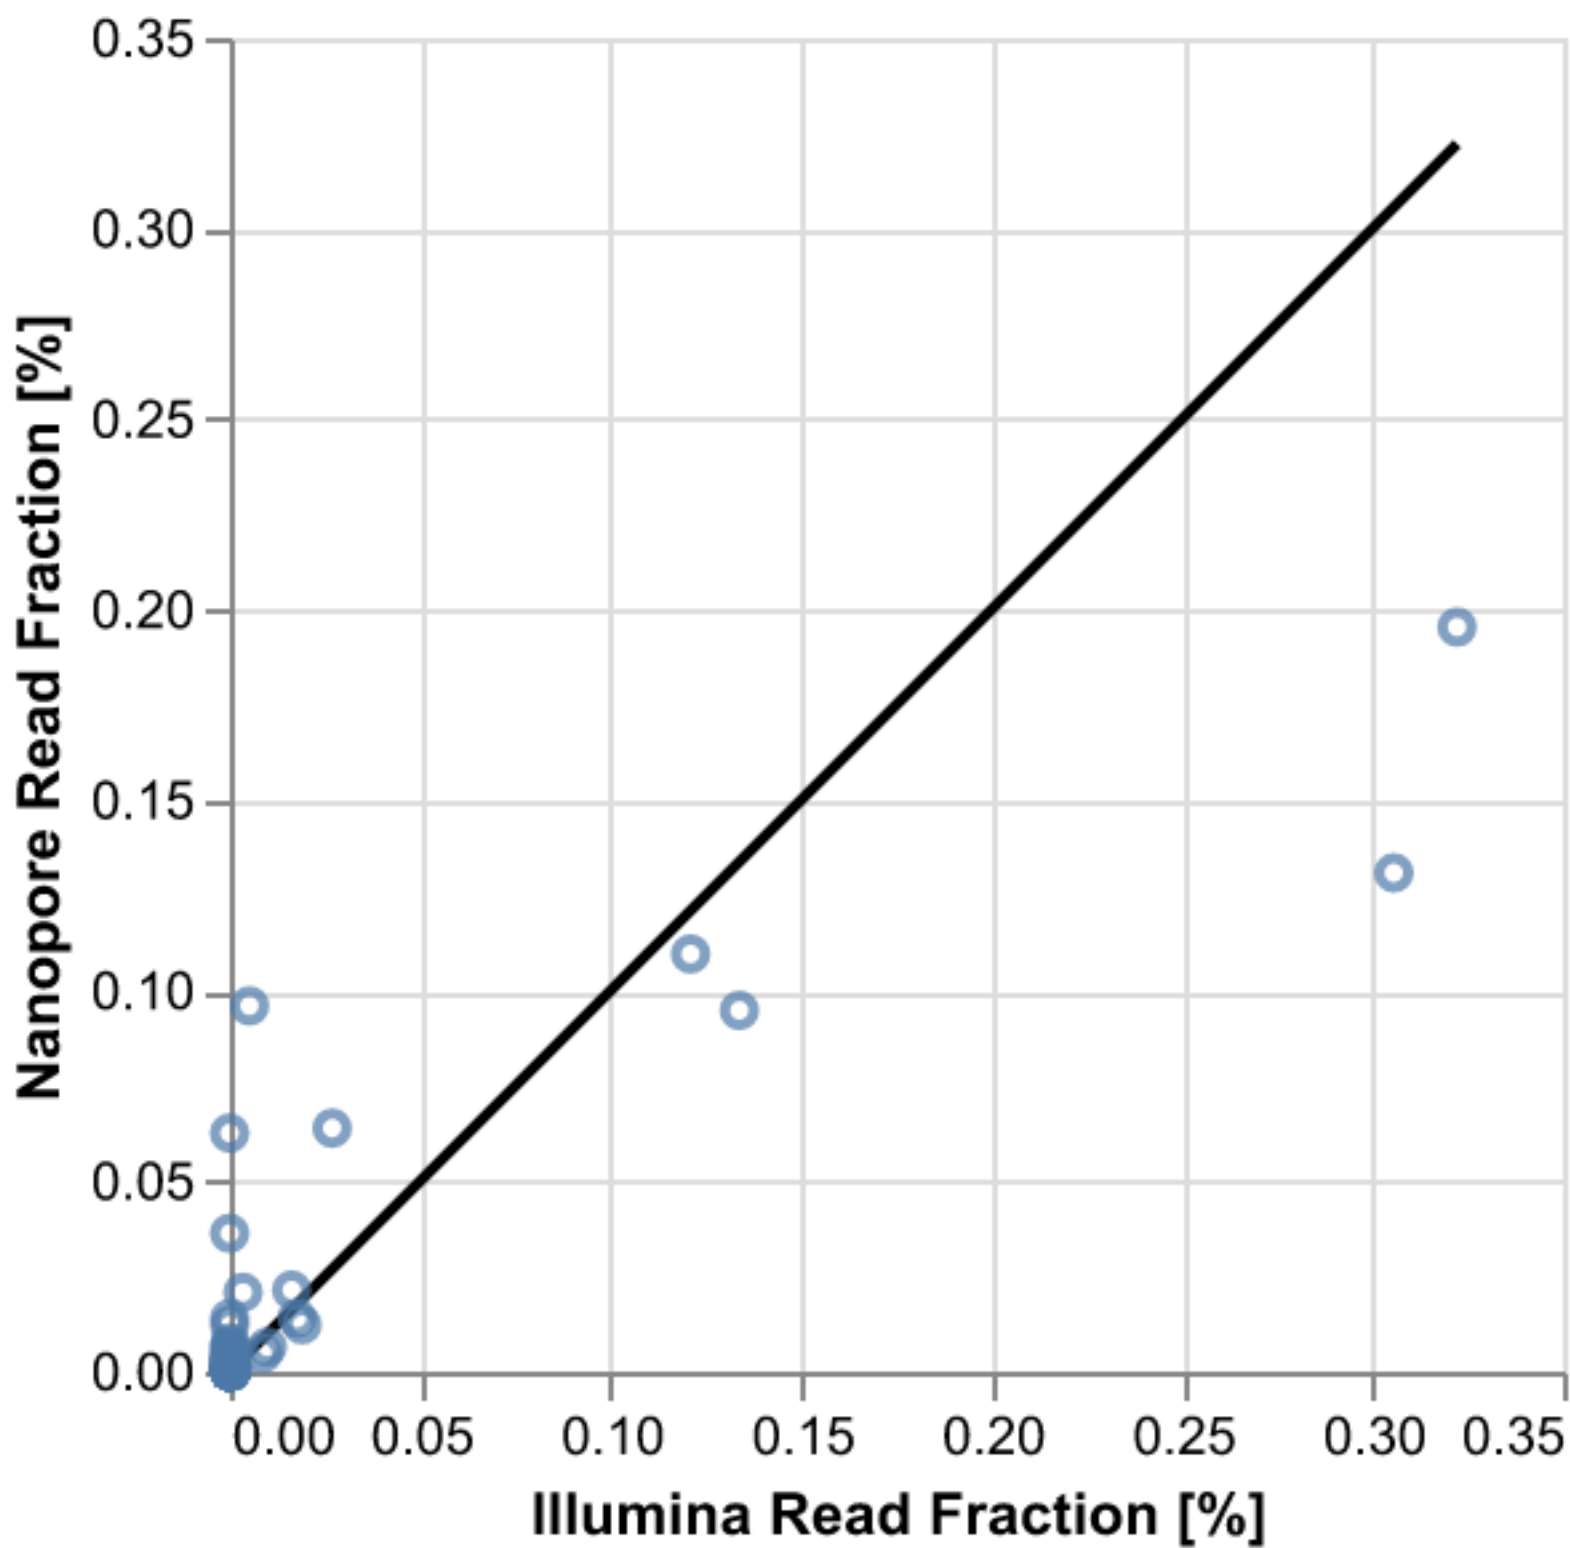



18\_-3

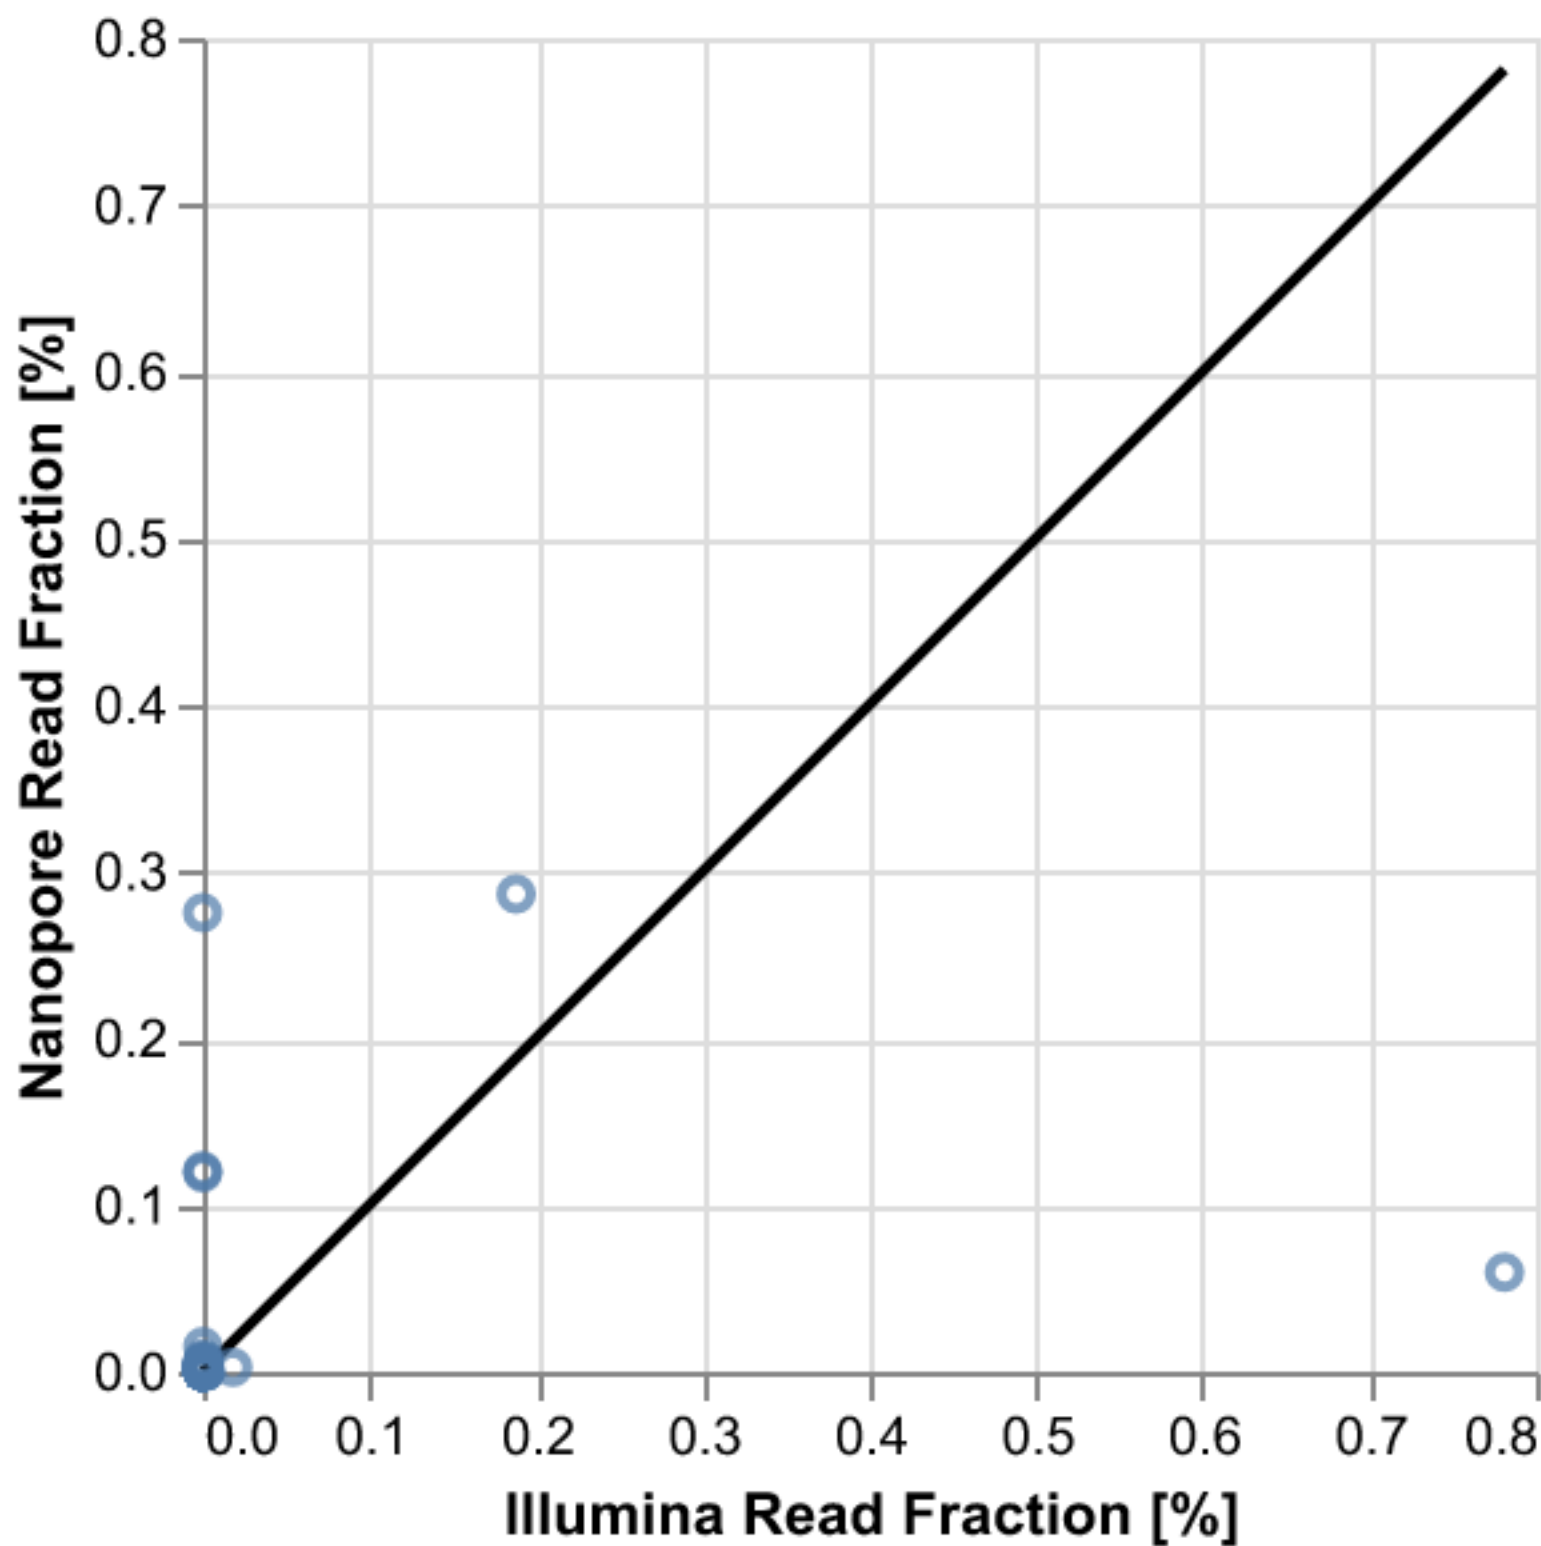

**18\_91**

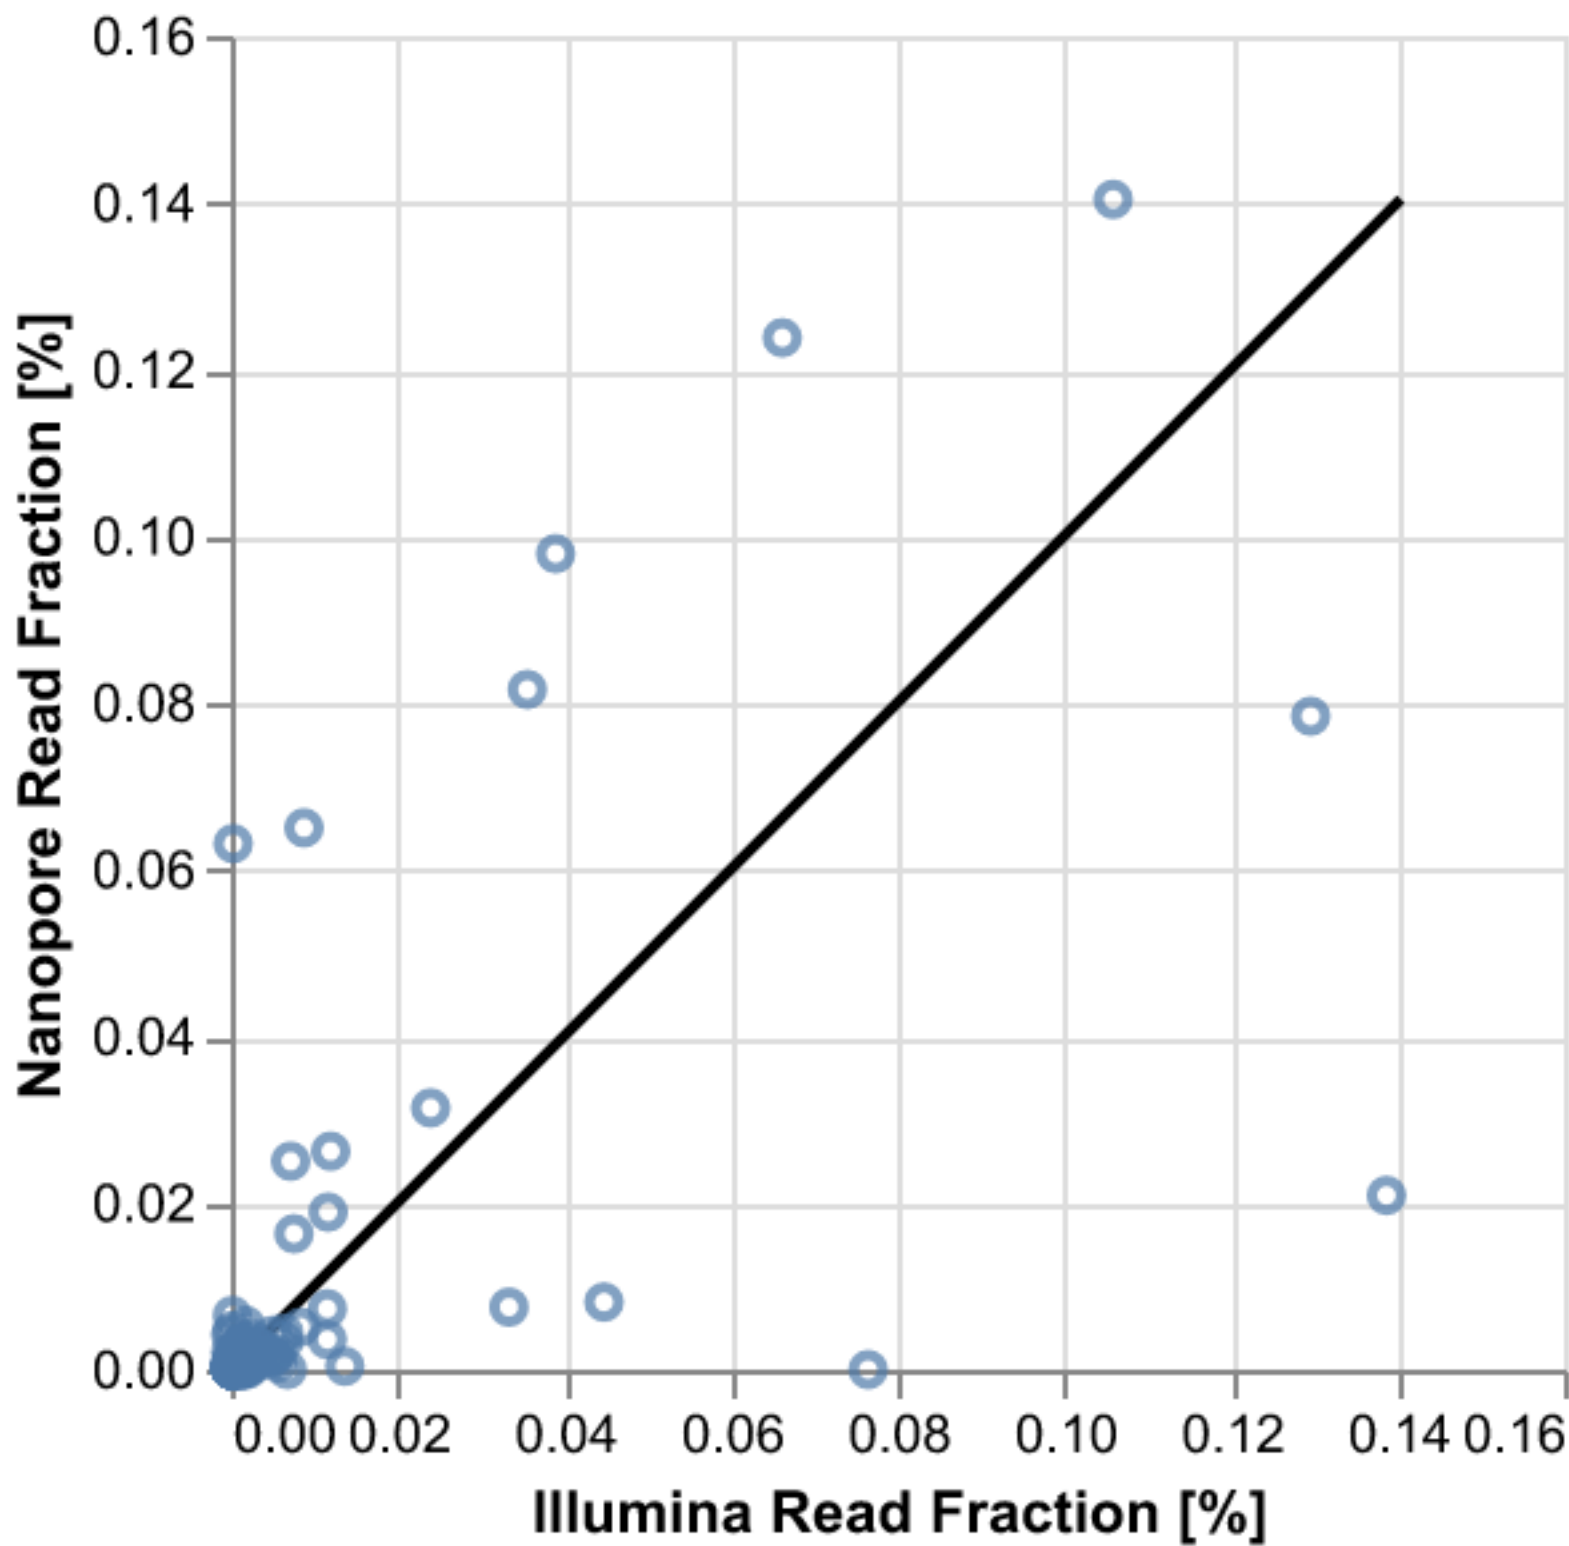

19\_153

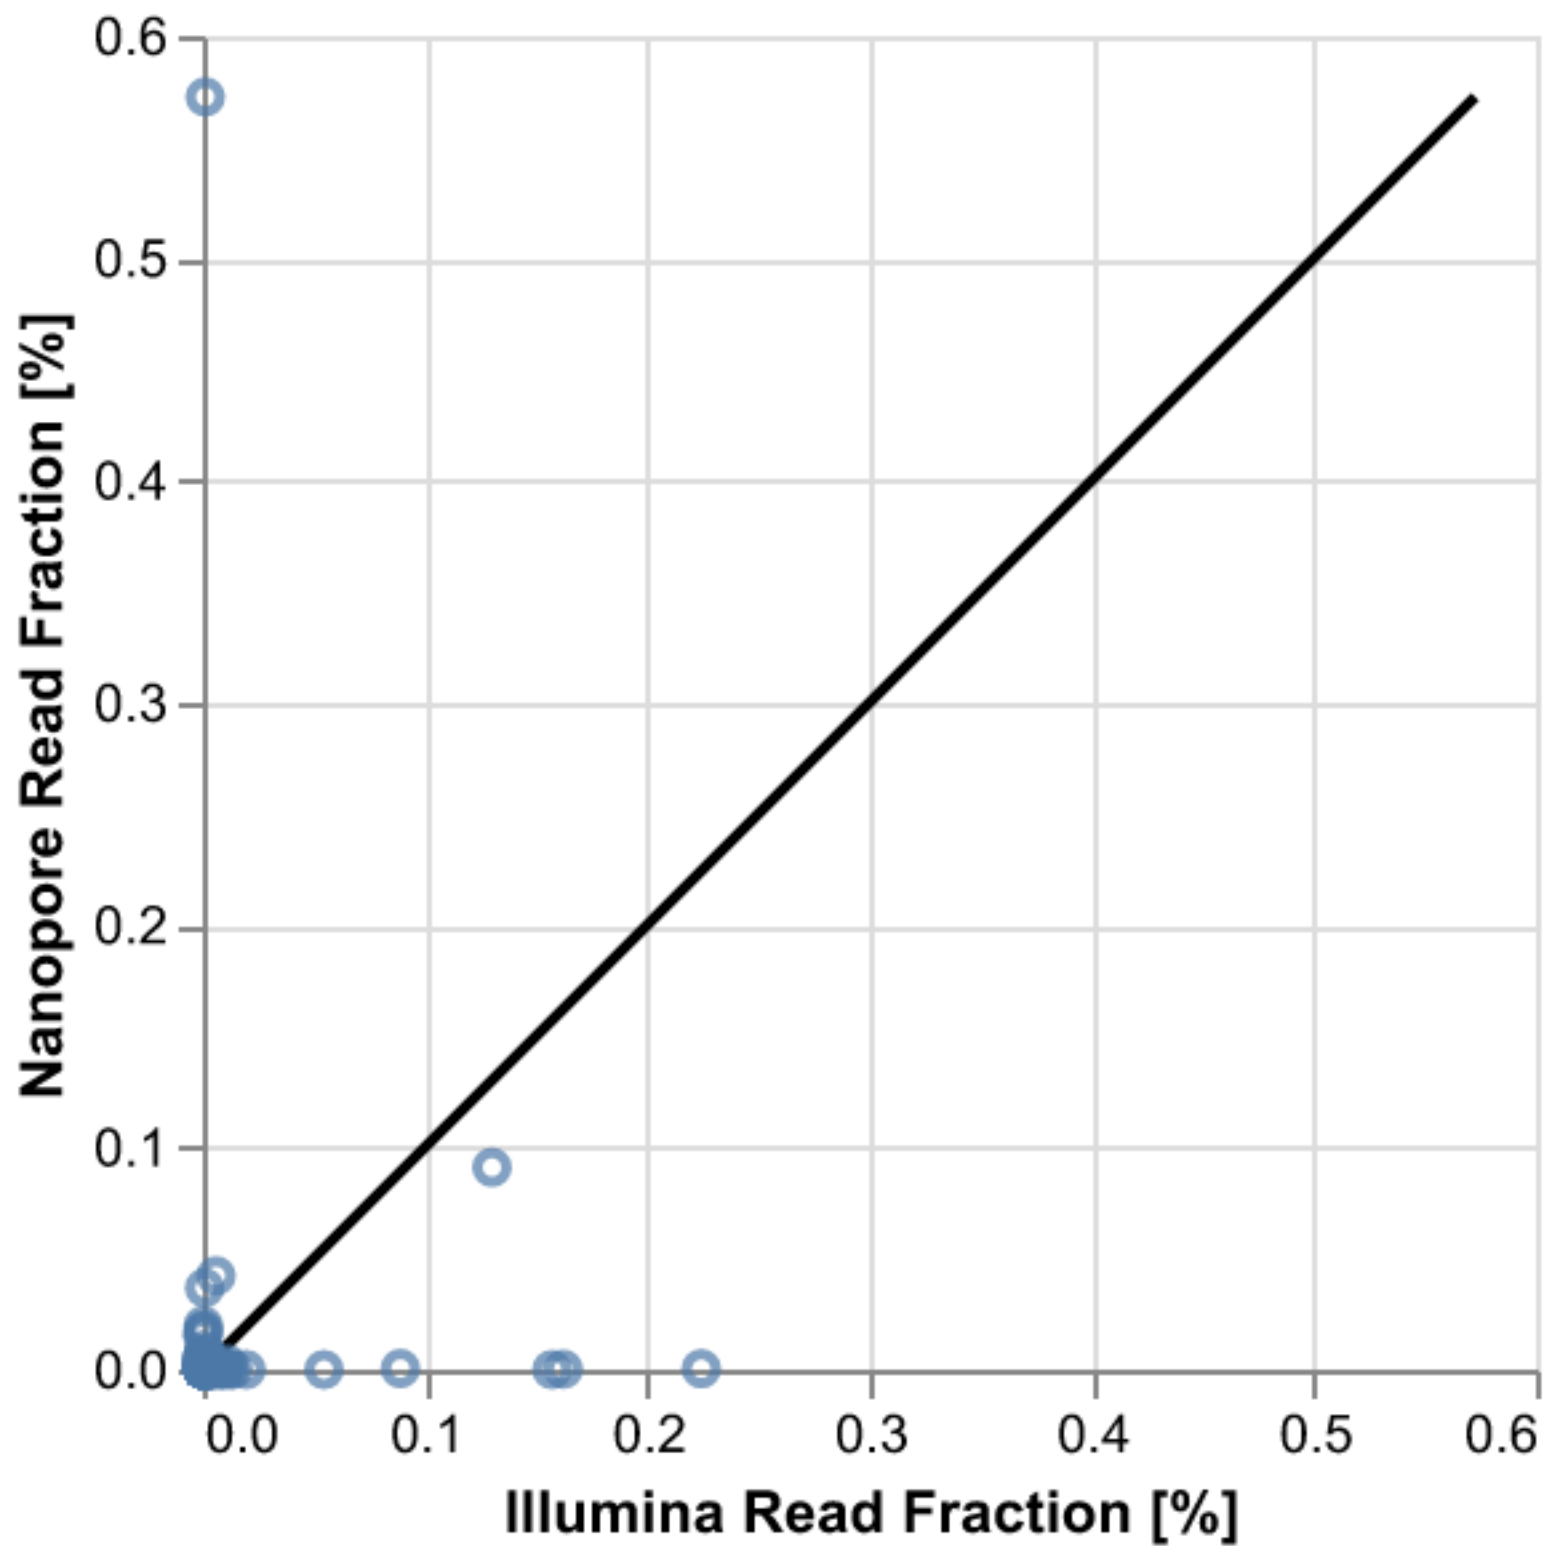

19\_-2

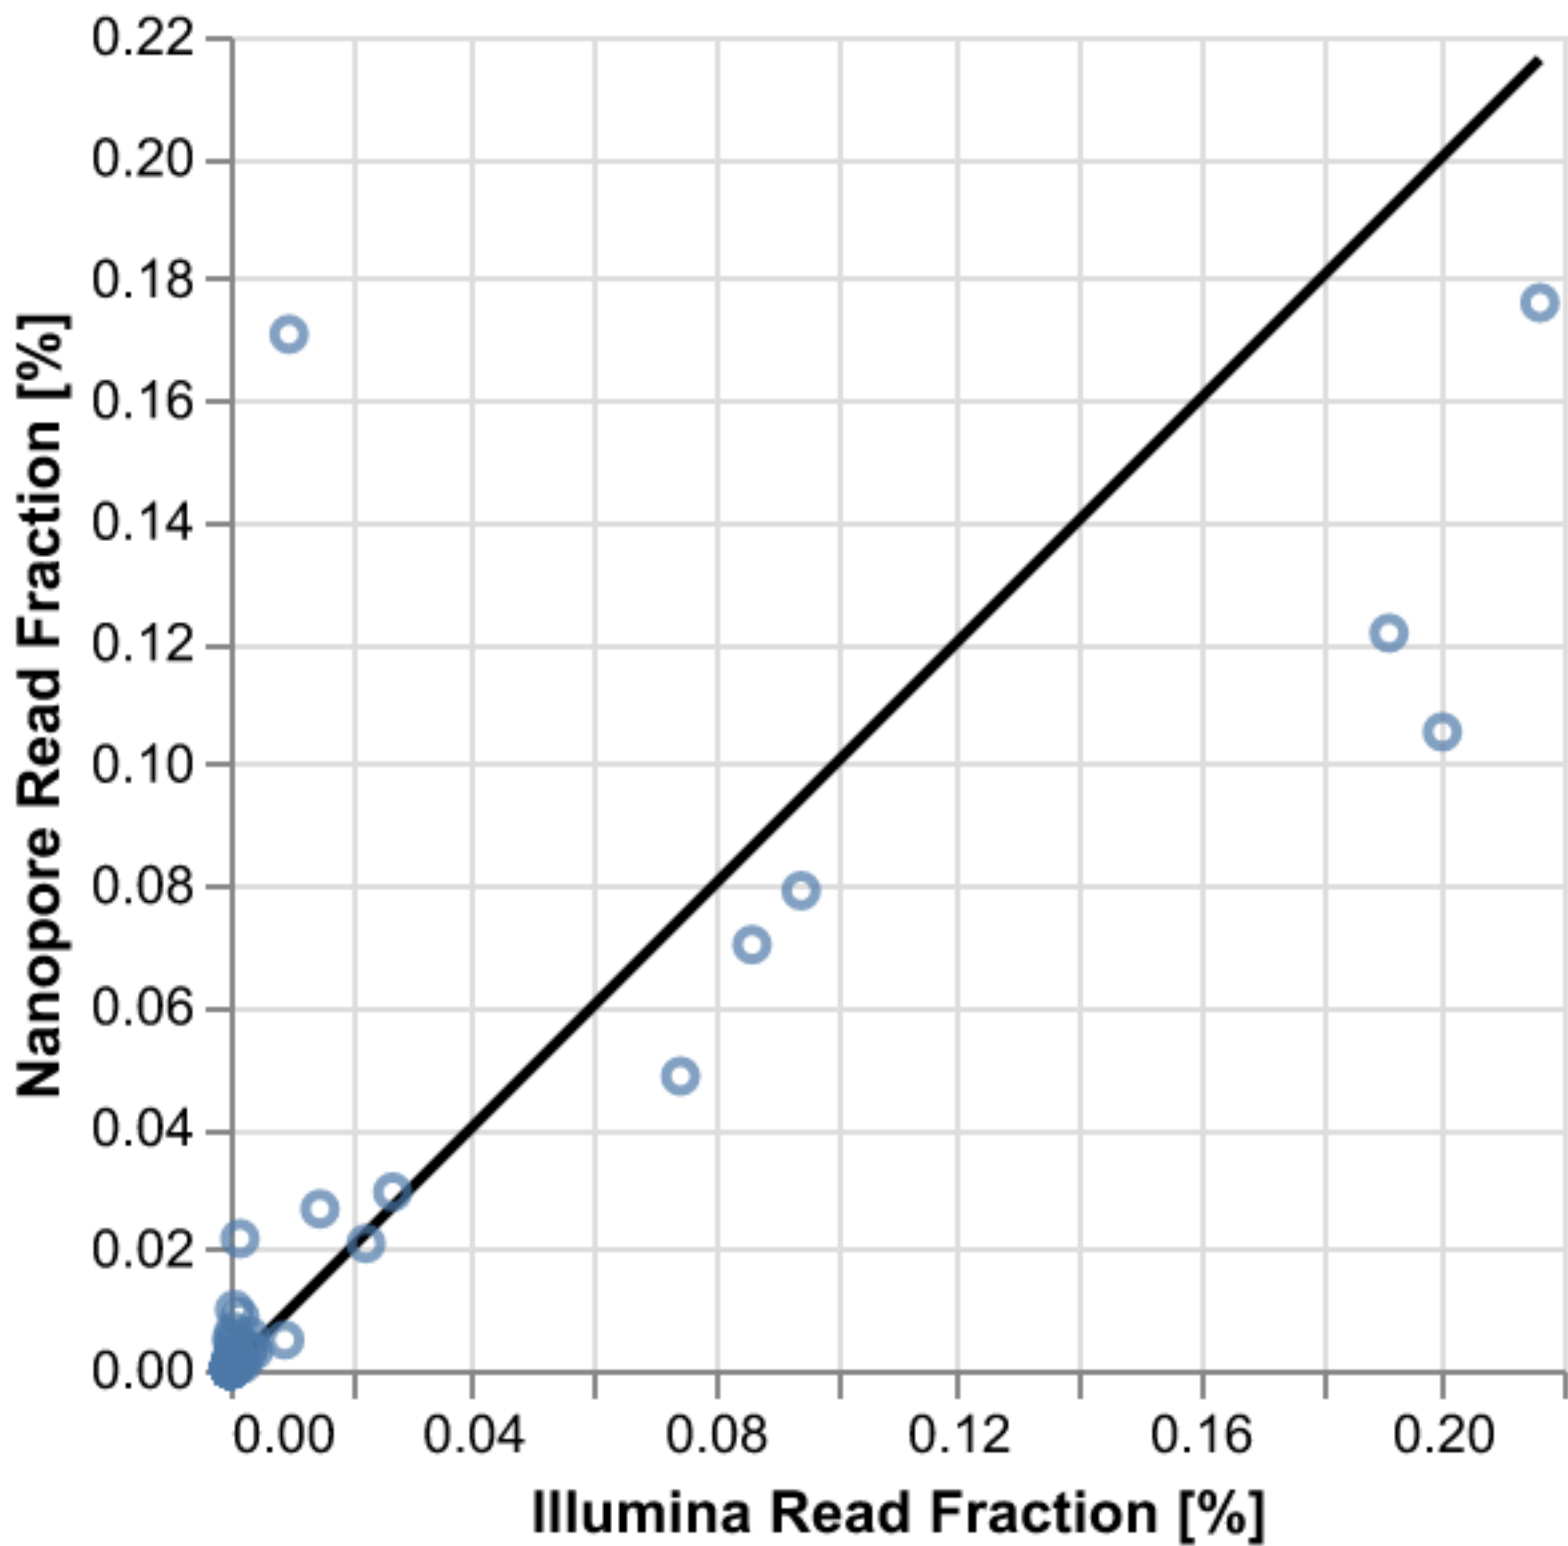

21\_120

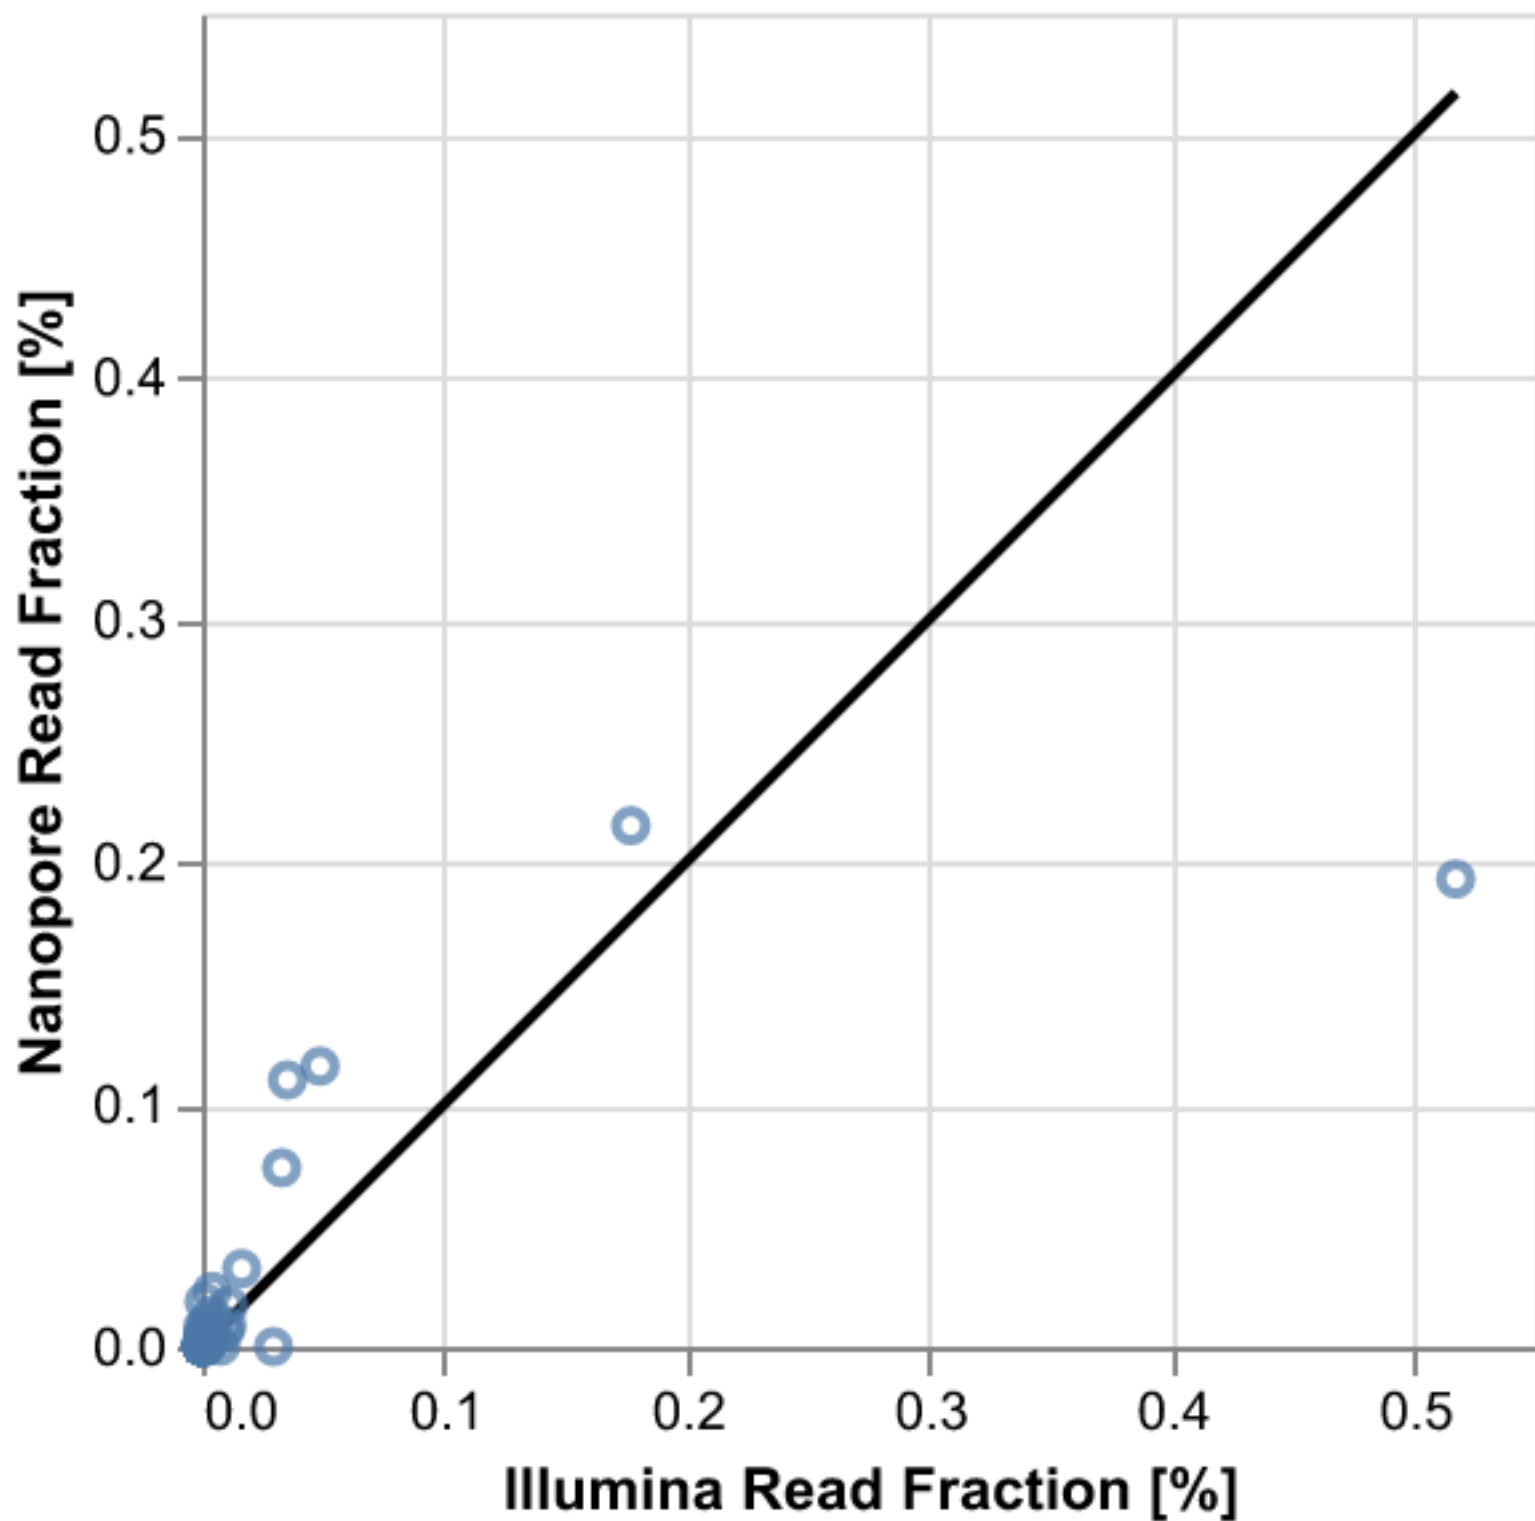

21\_-3

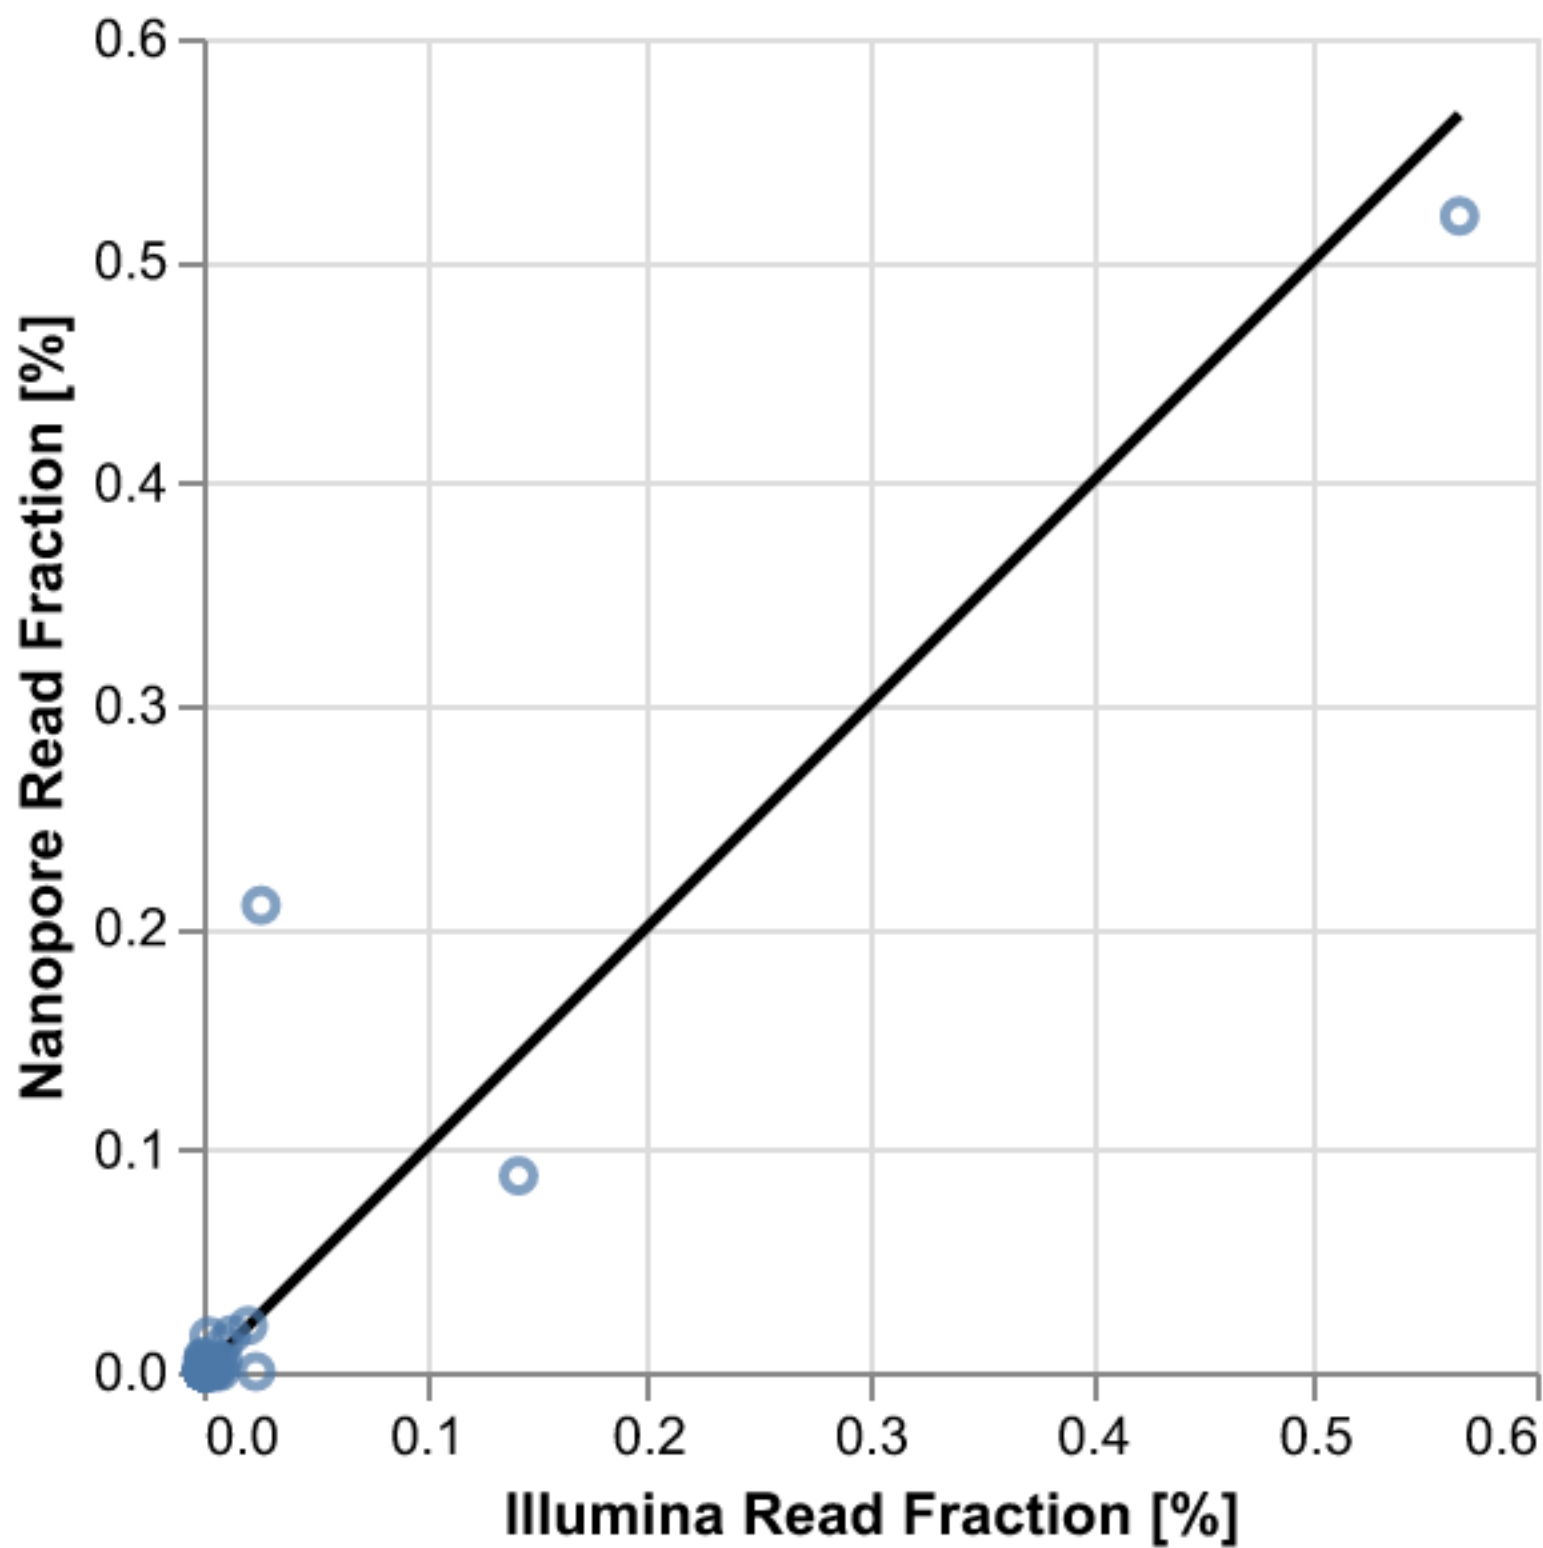

21\_50

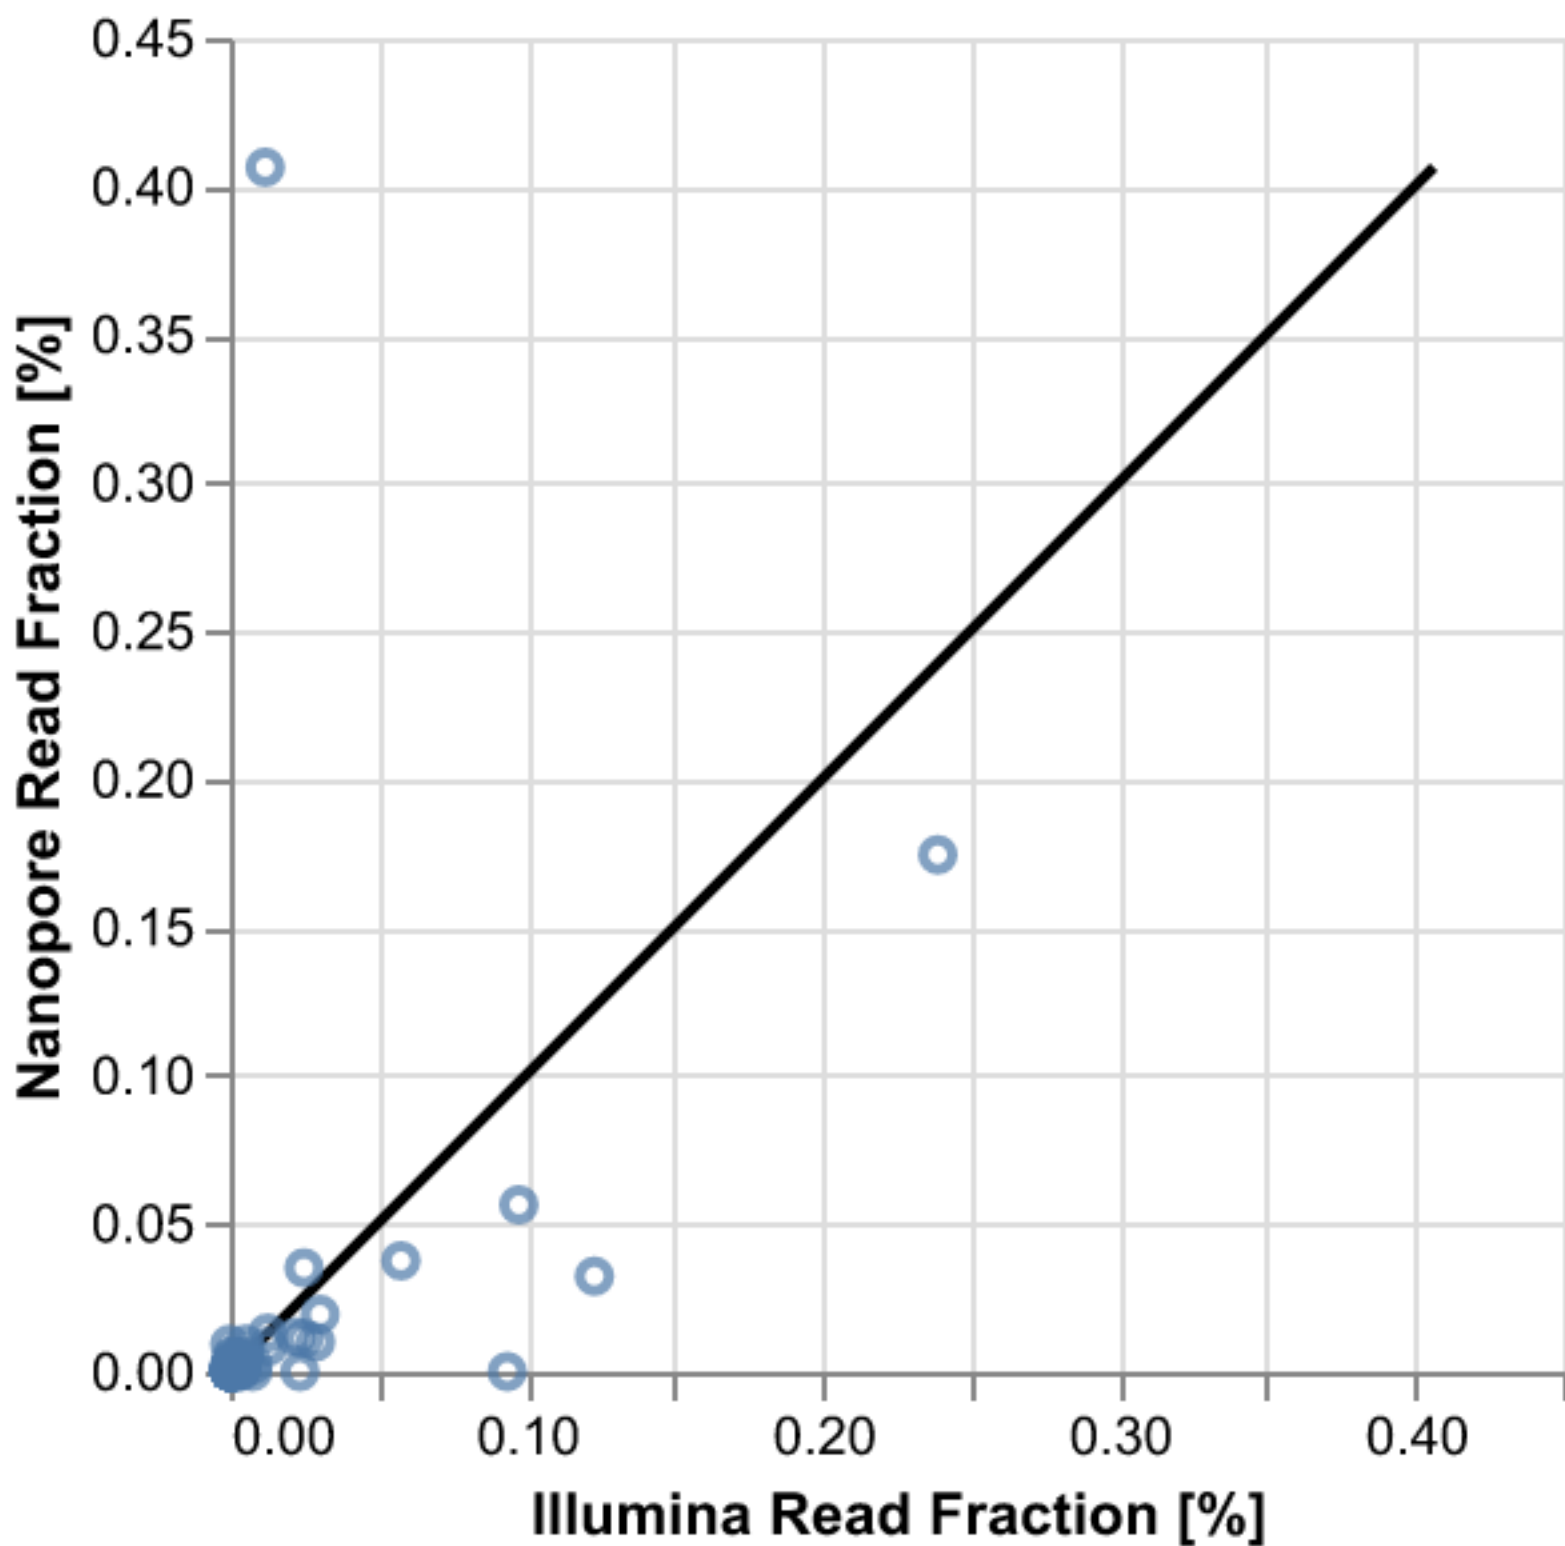

21\_-9

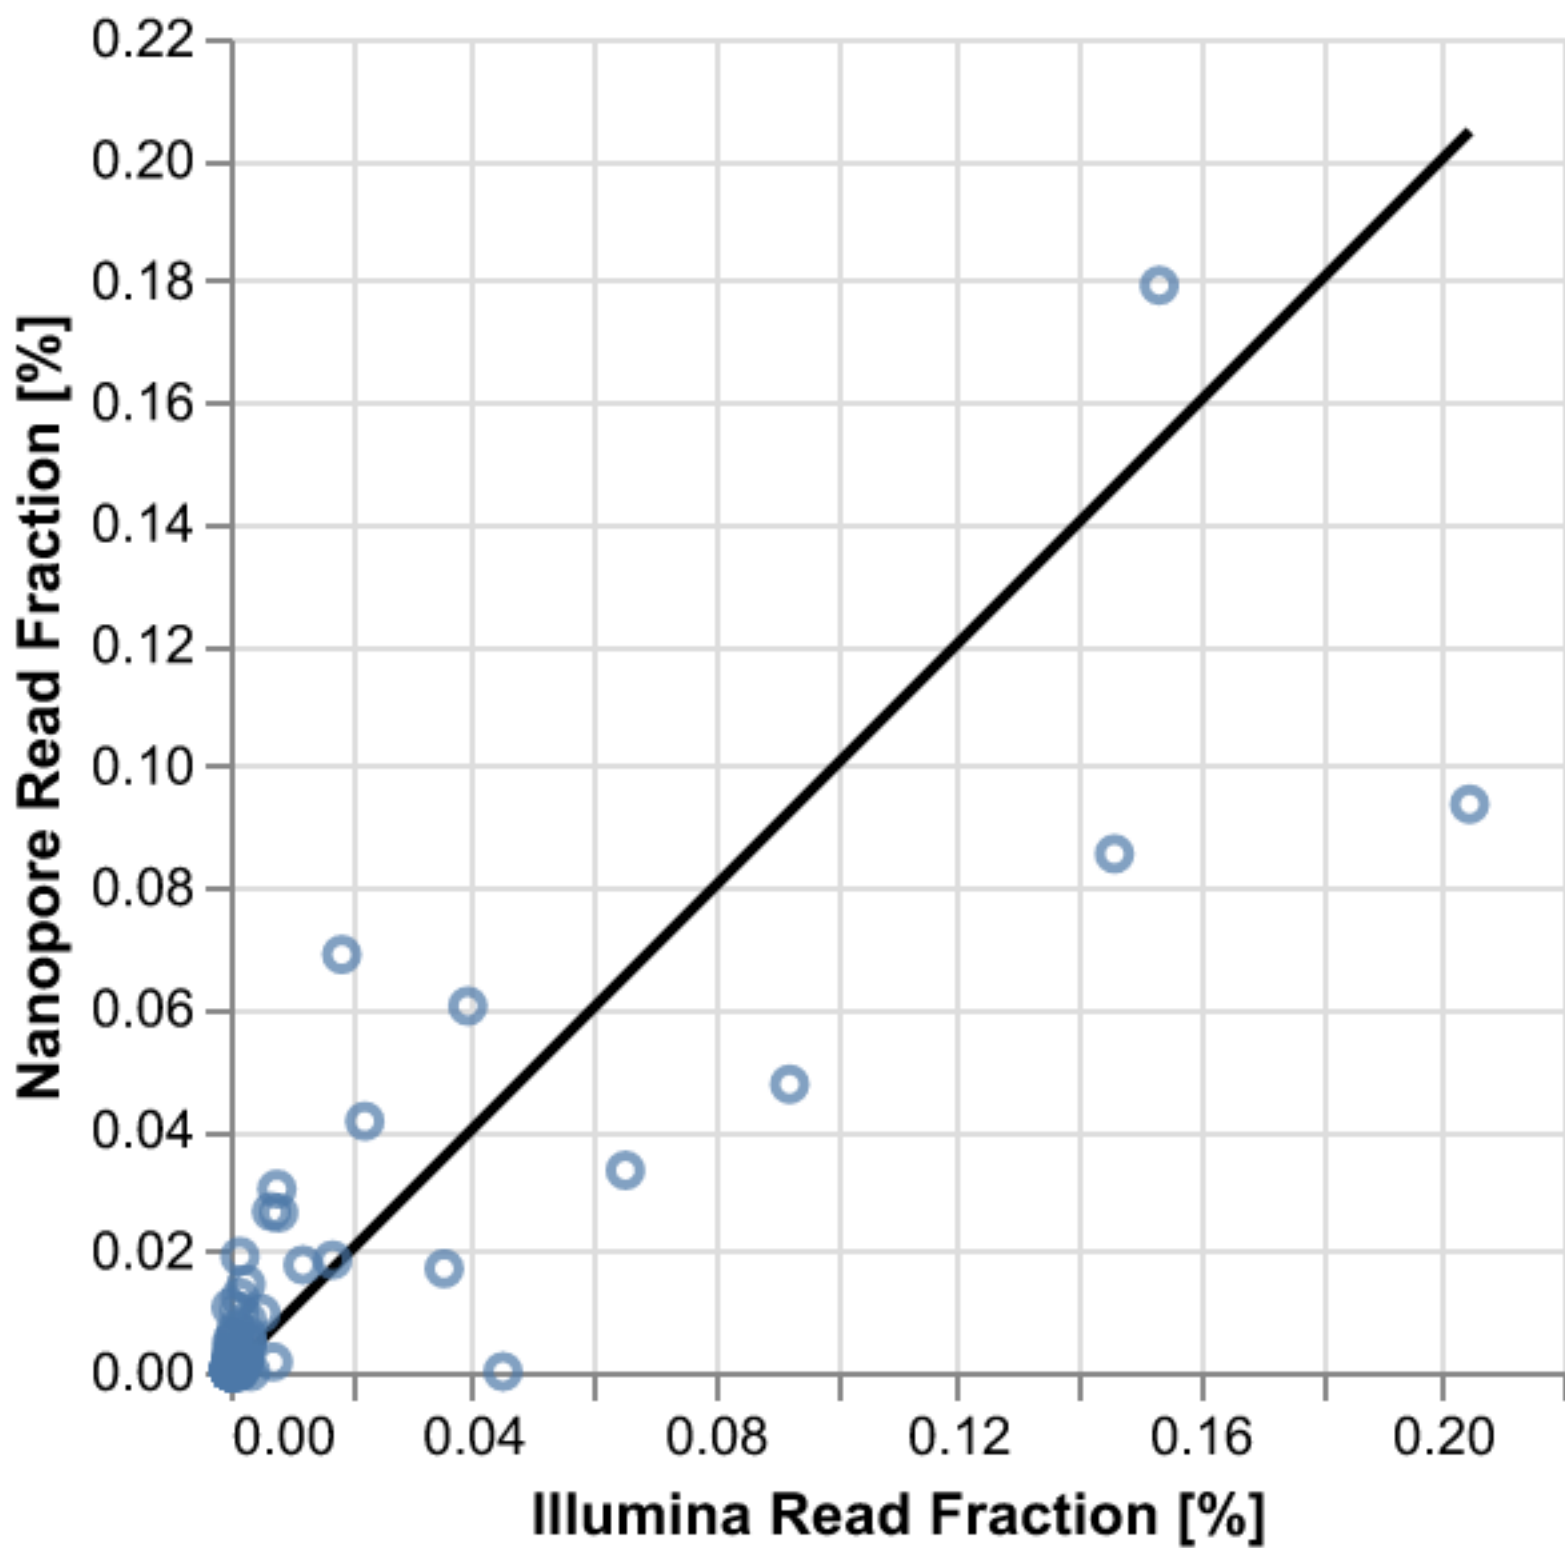



23\_-9

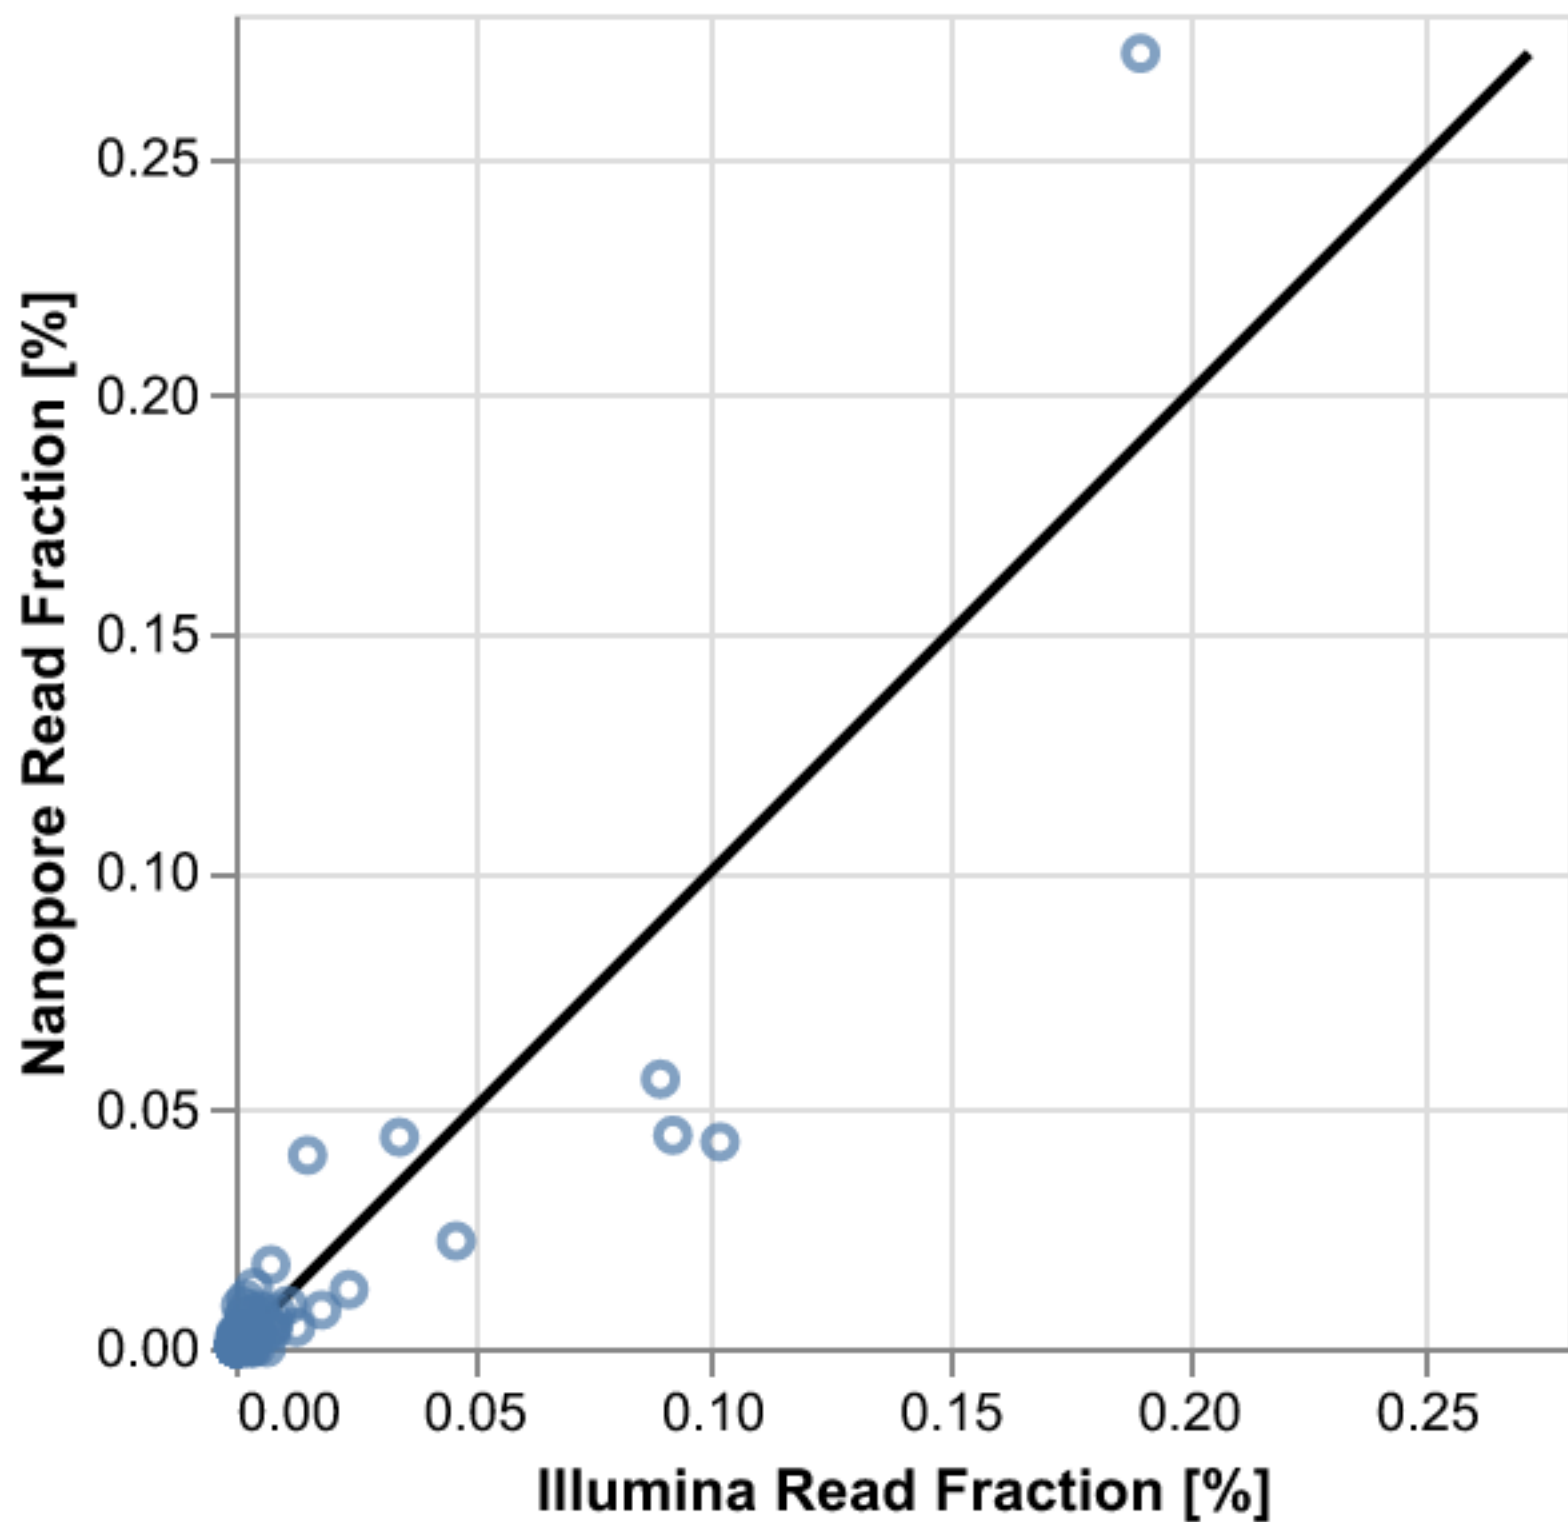

24\_0

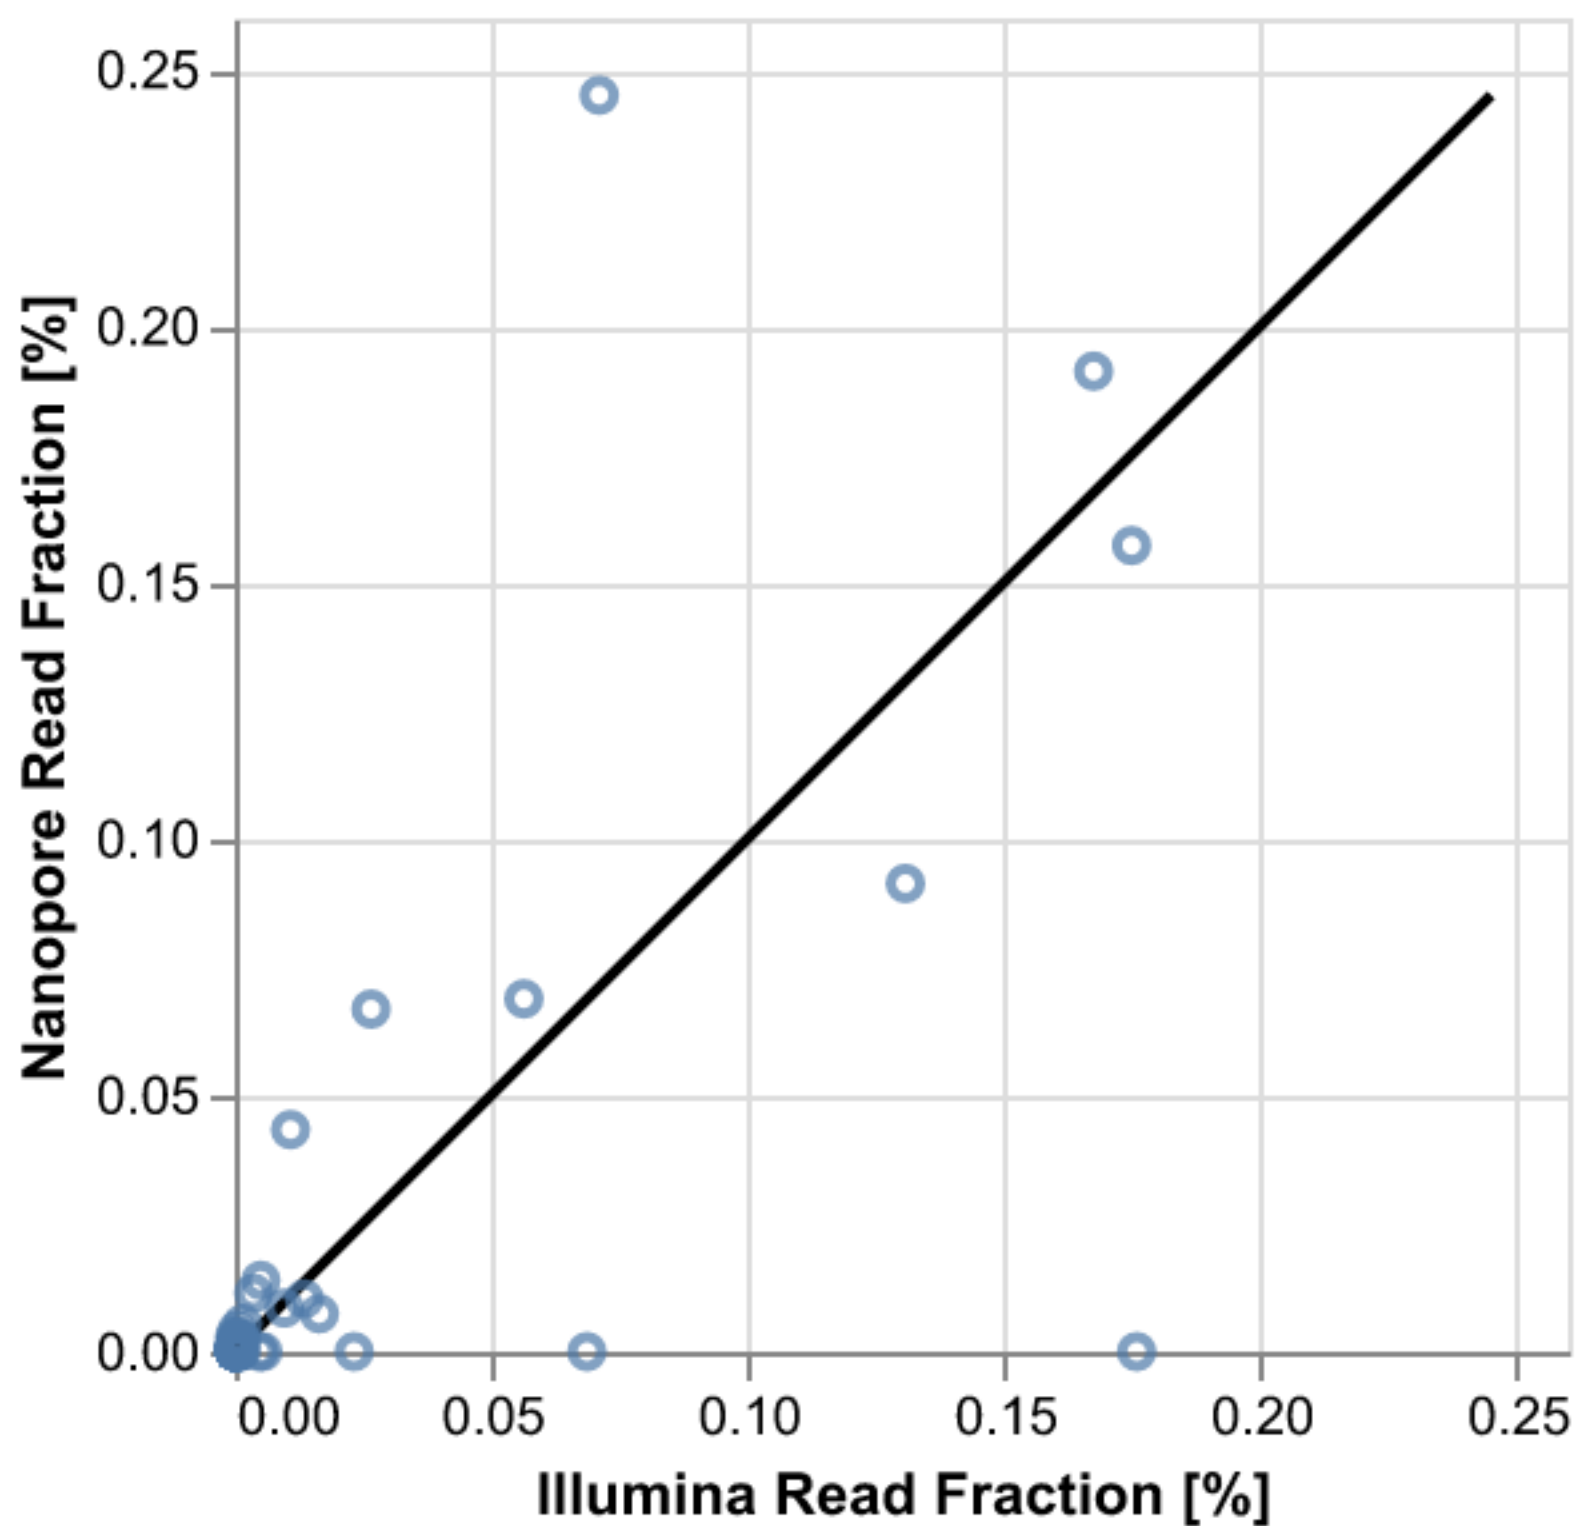

24\_-10

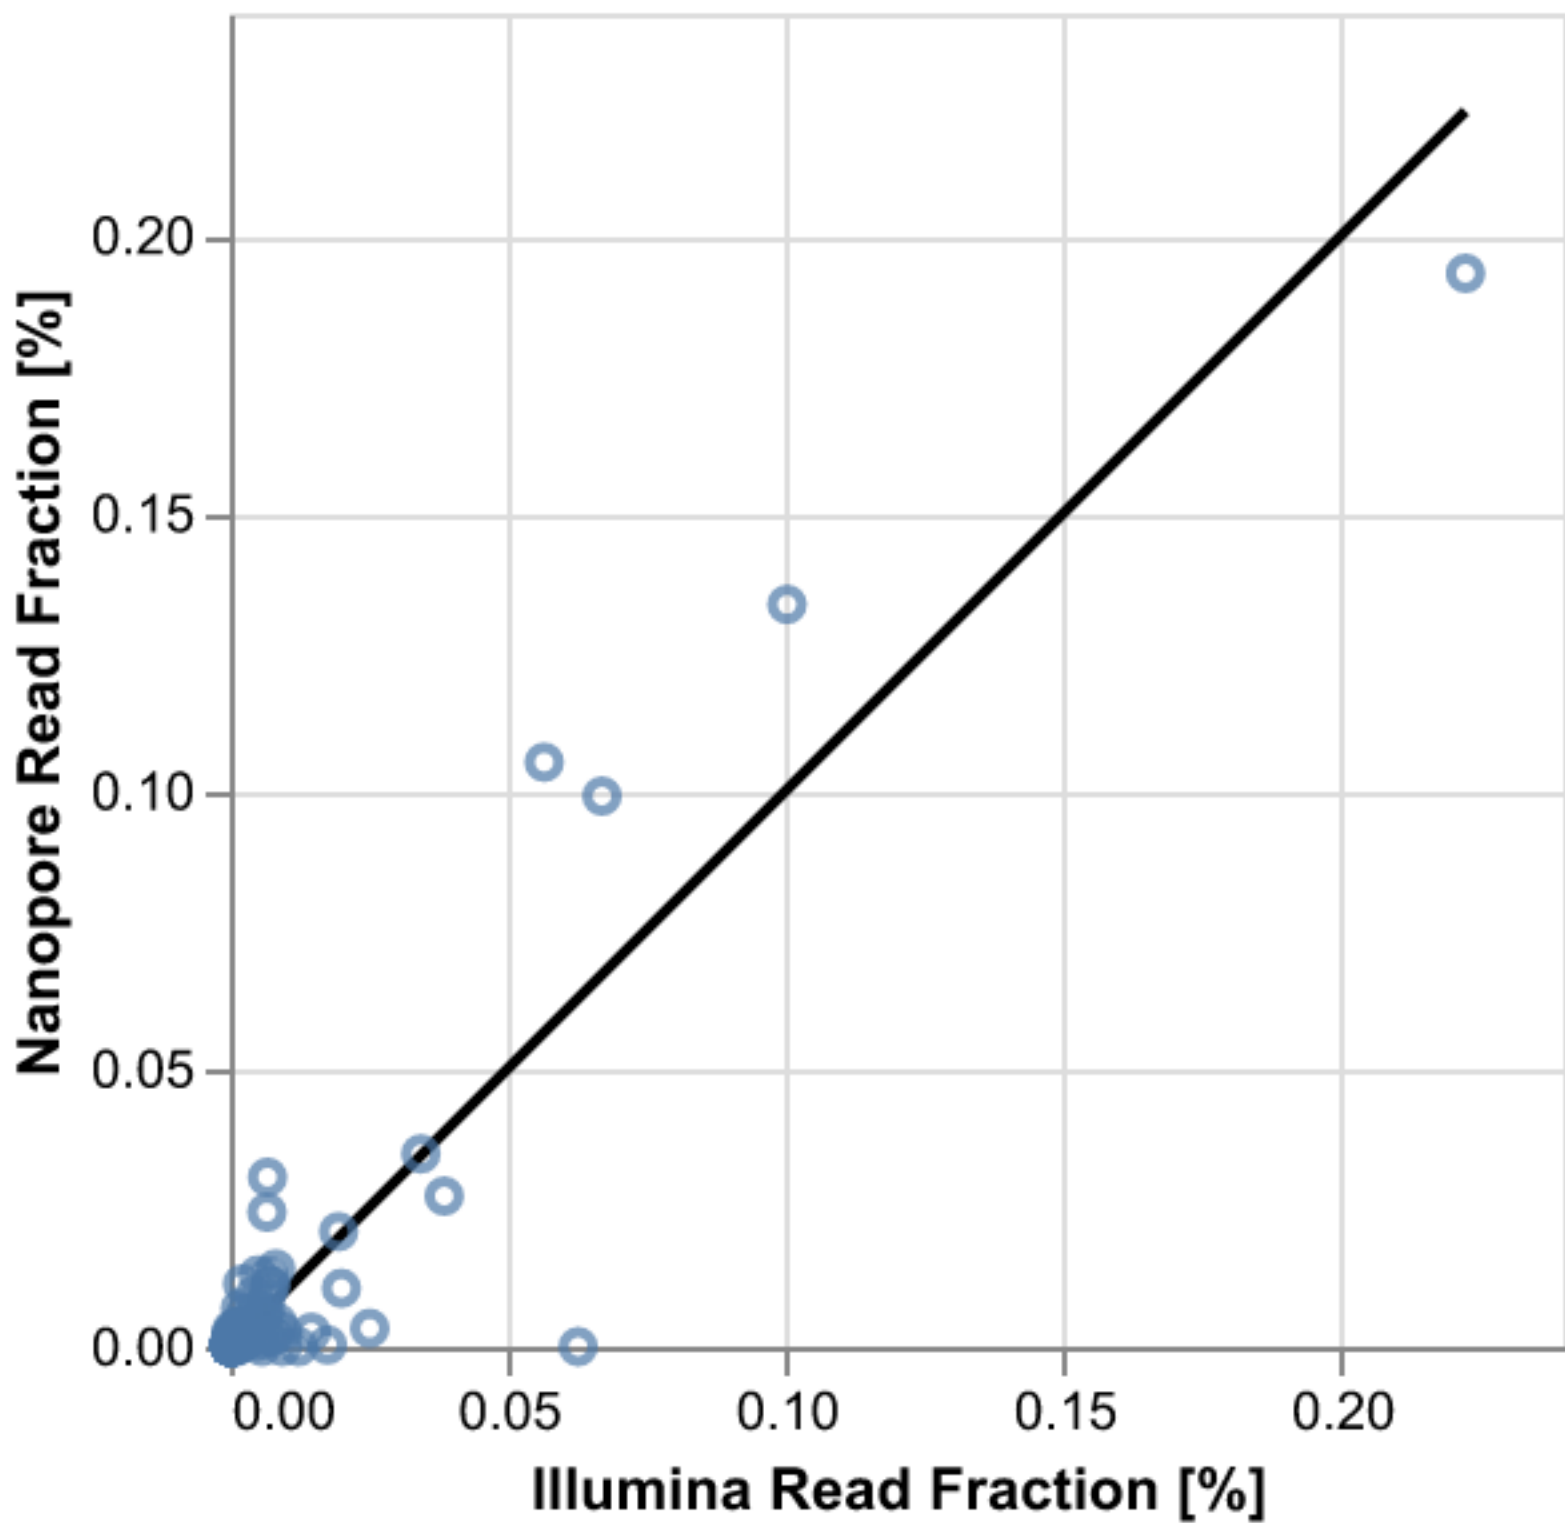

24\_49

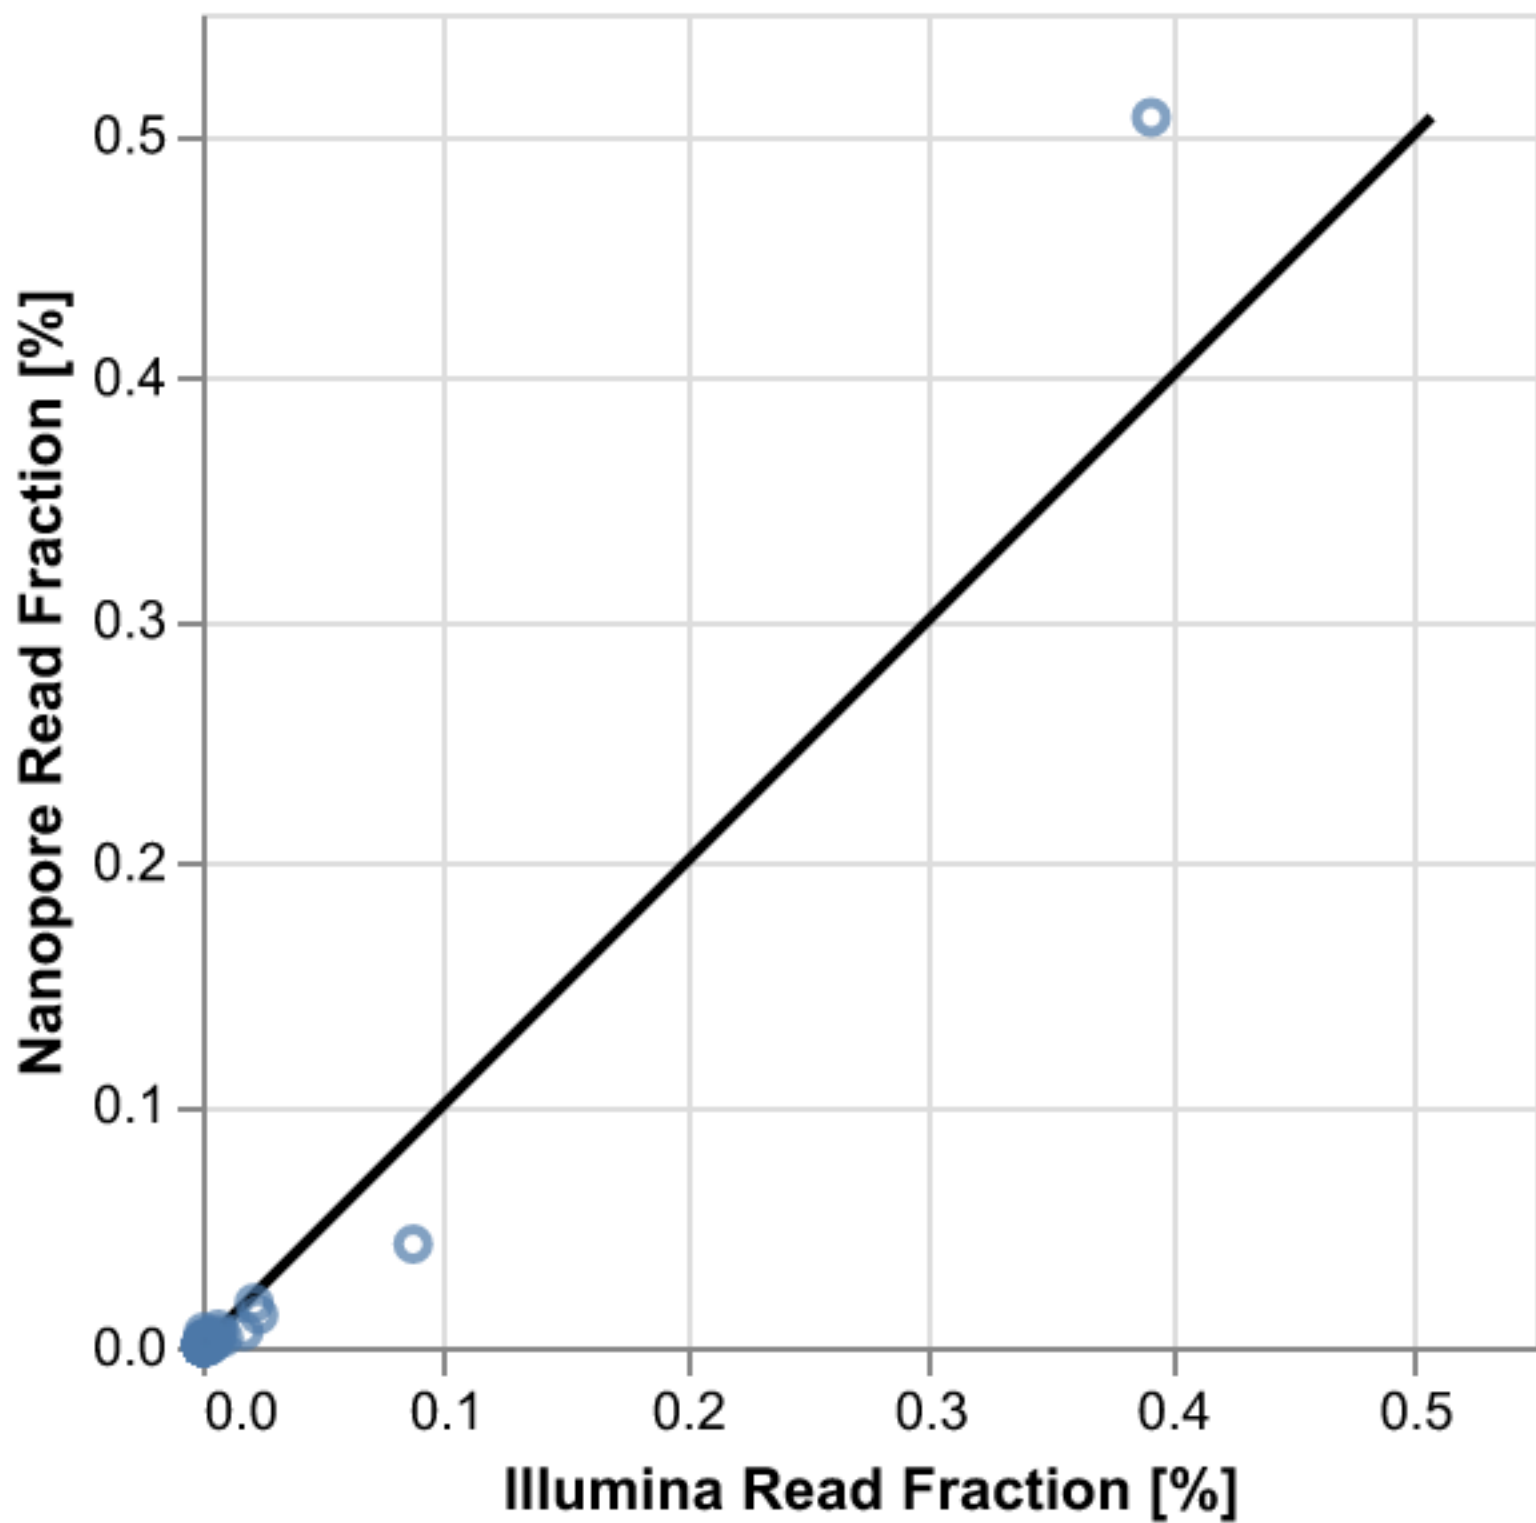

24\_9

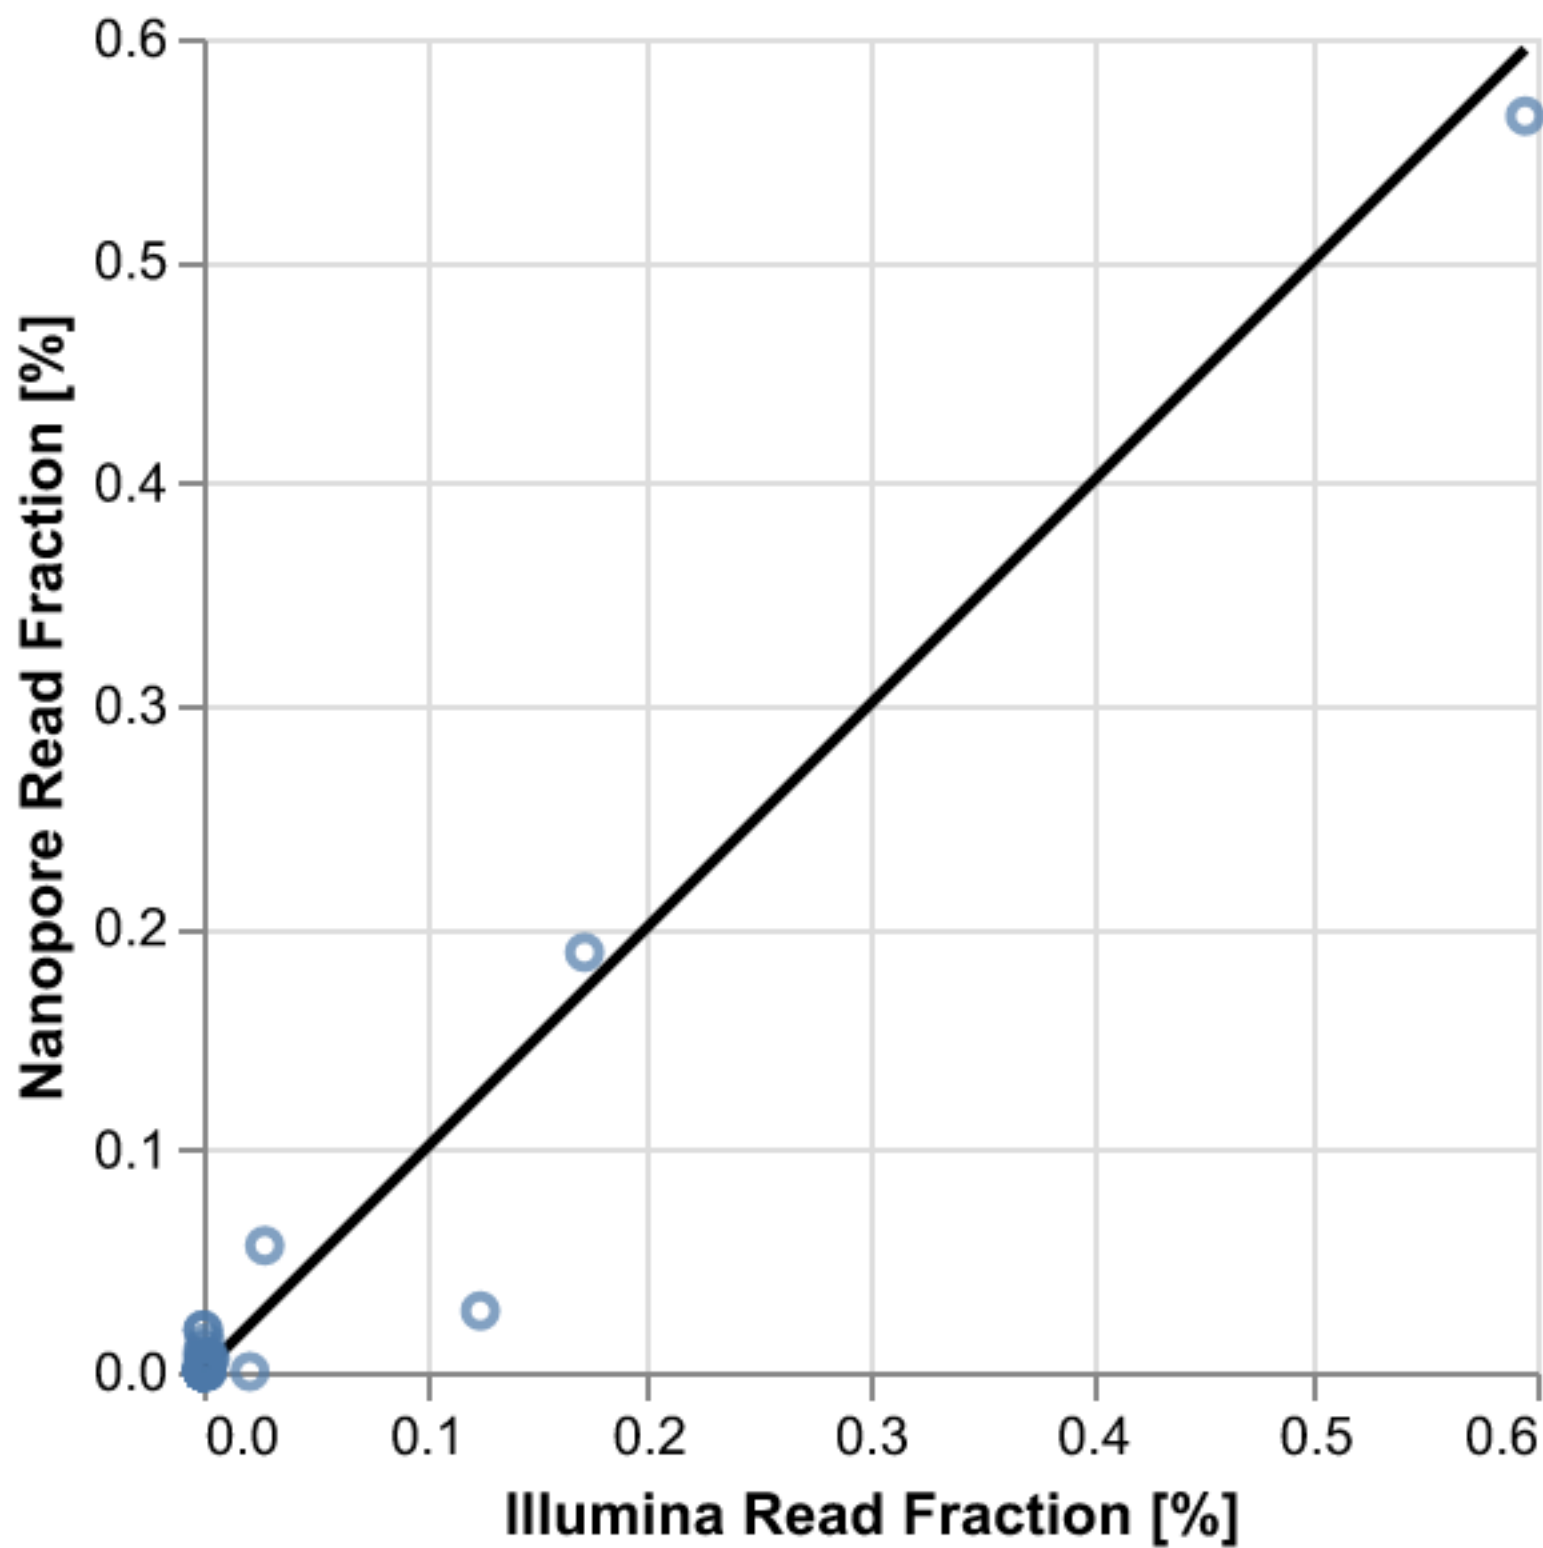

26\_185

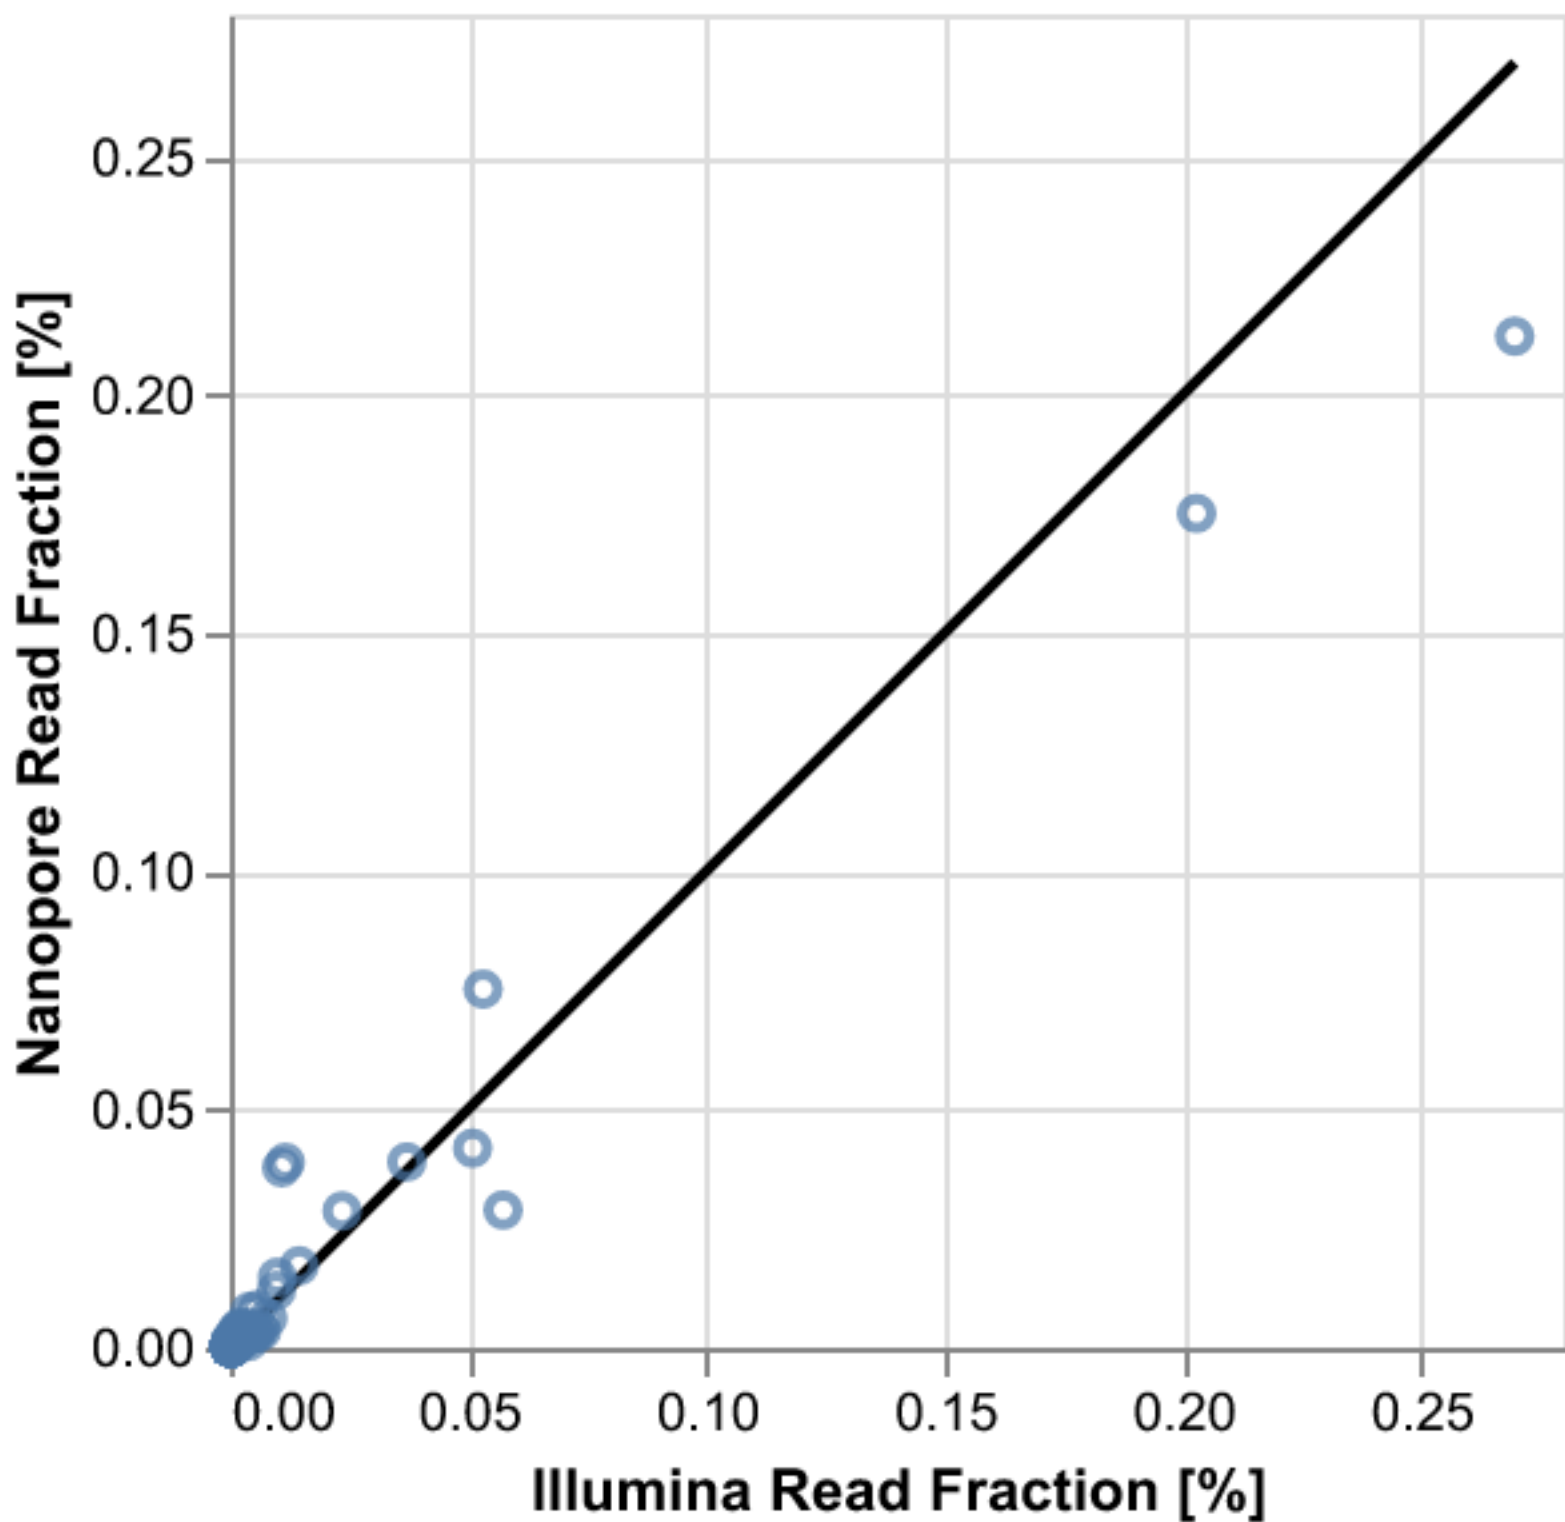

26\_27

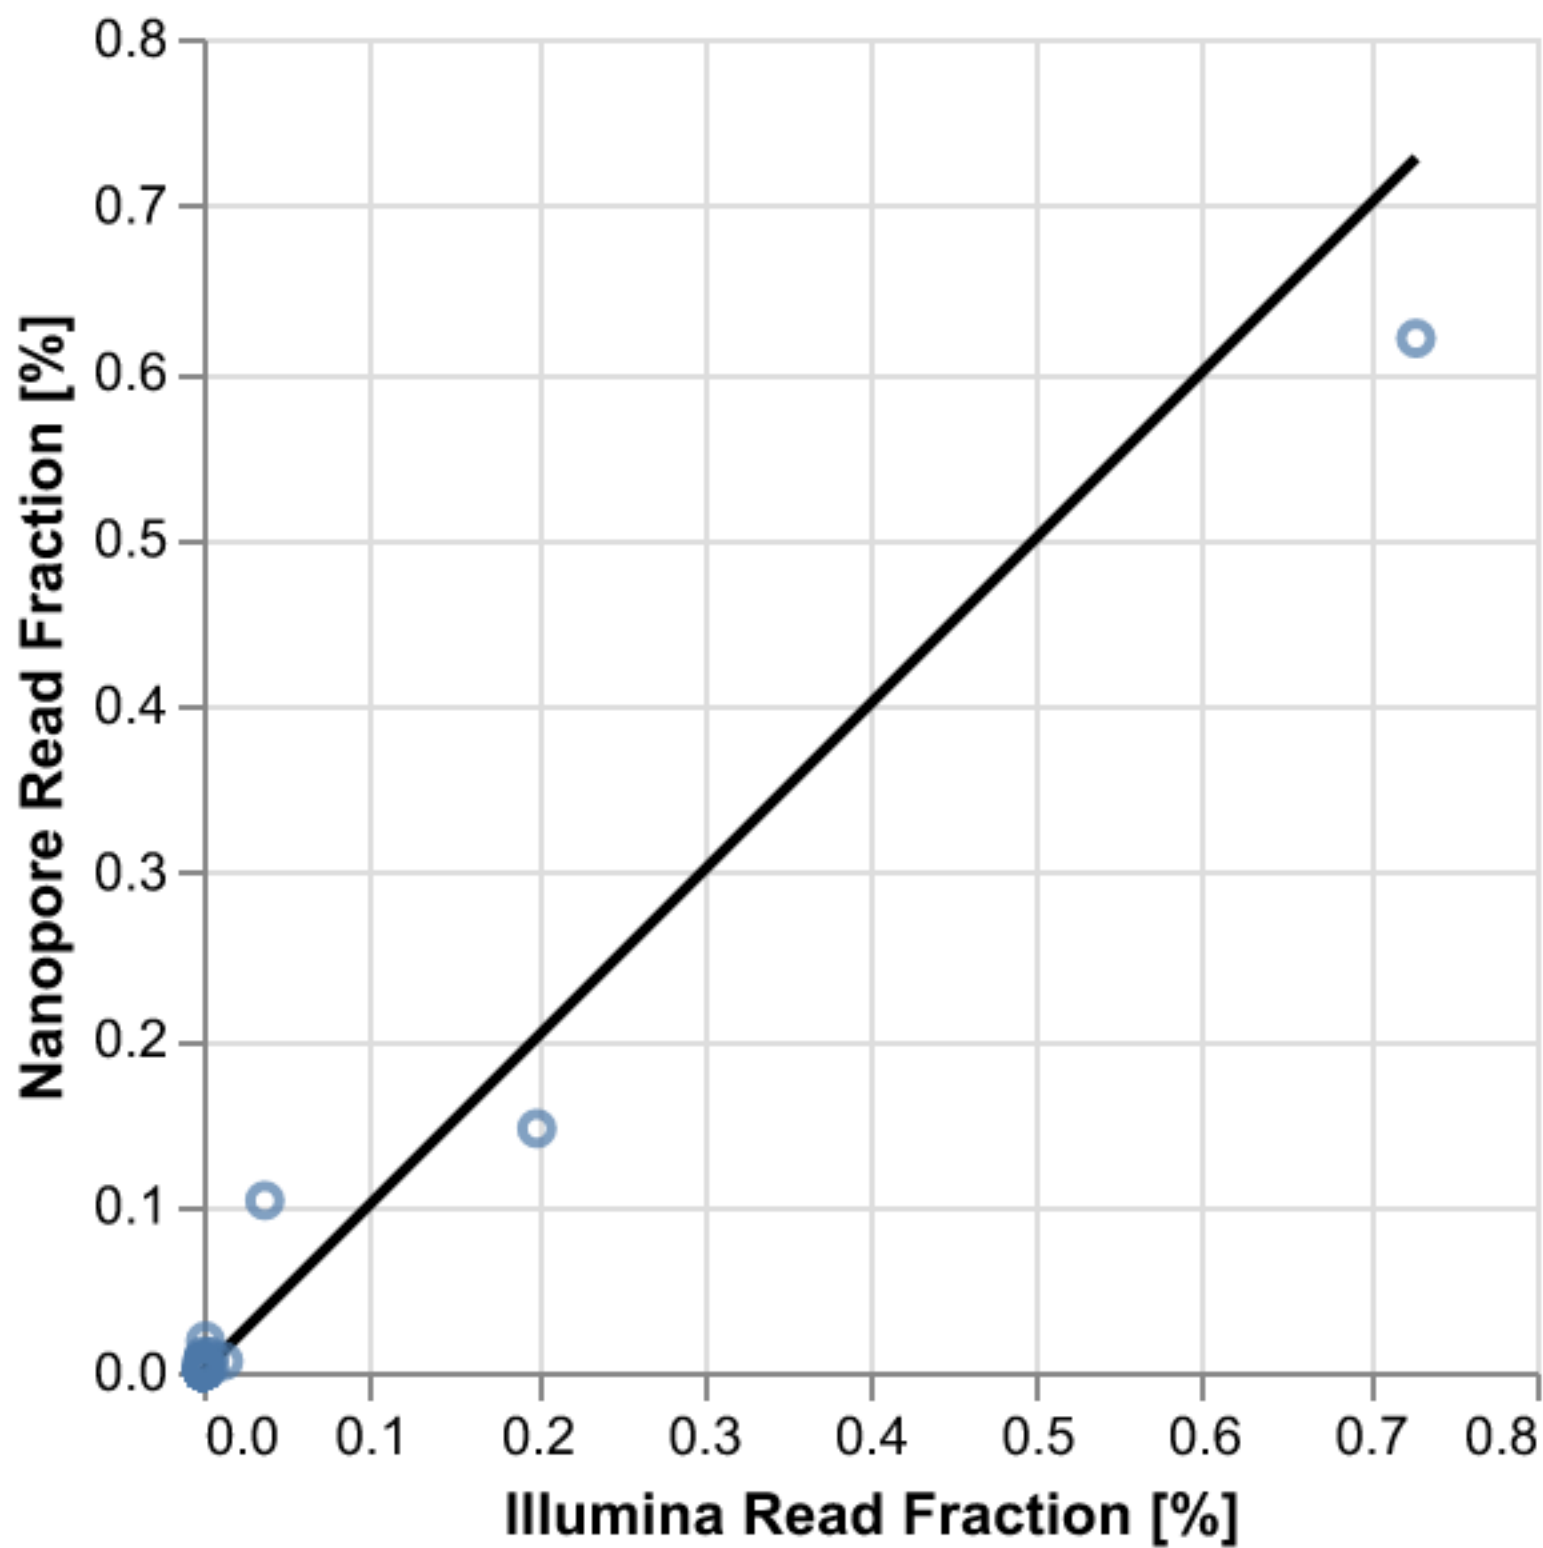

26\_-3

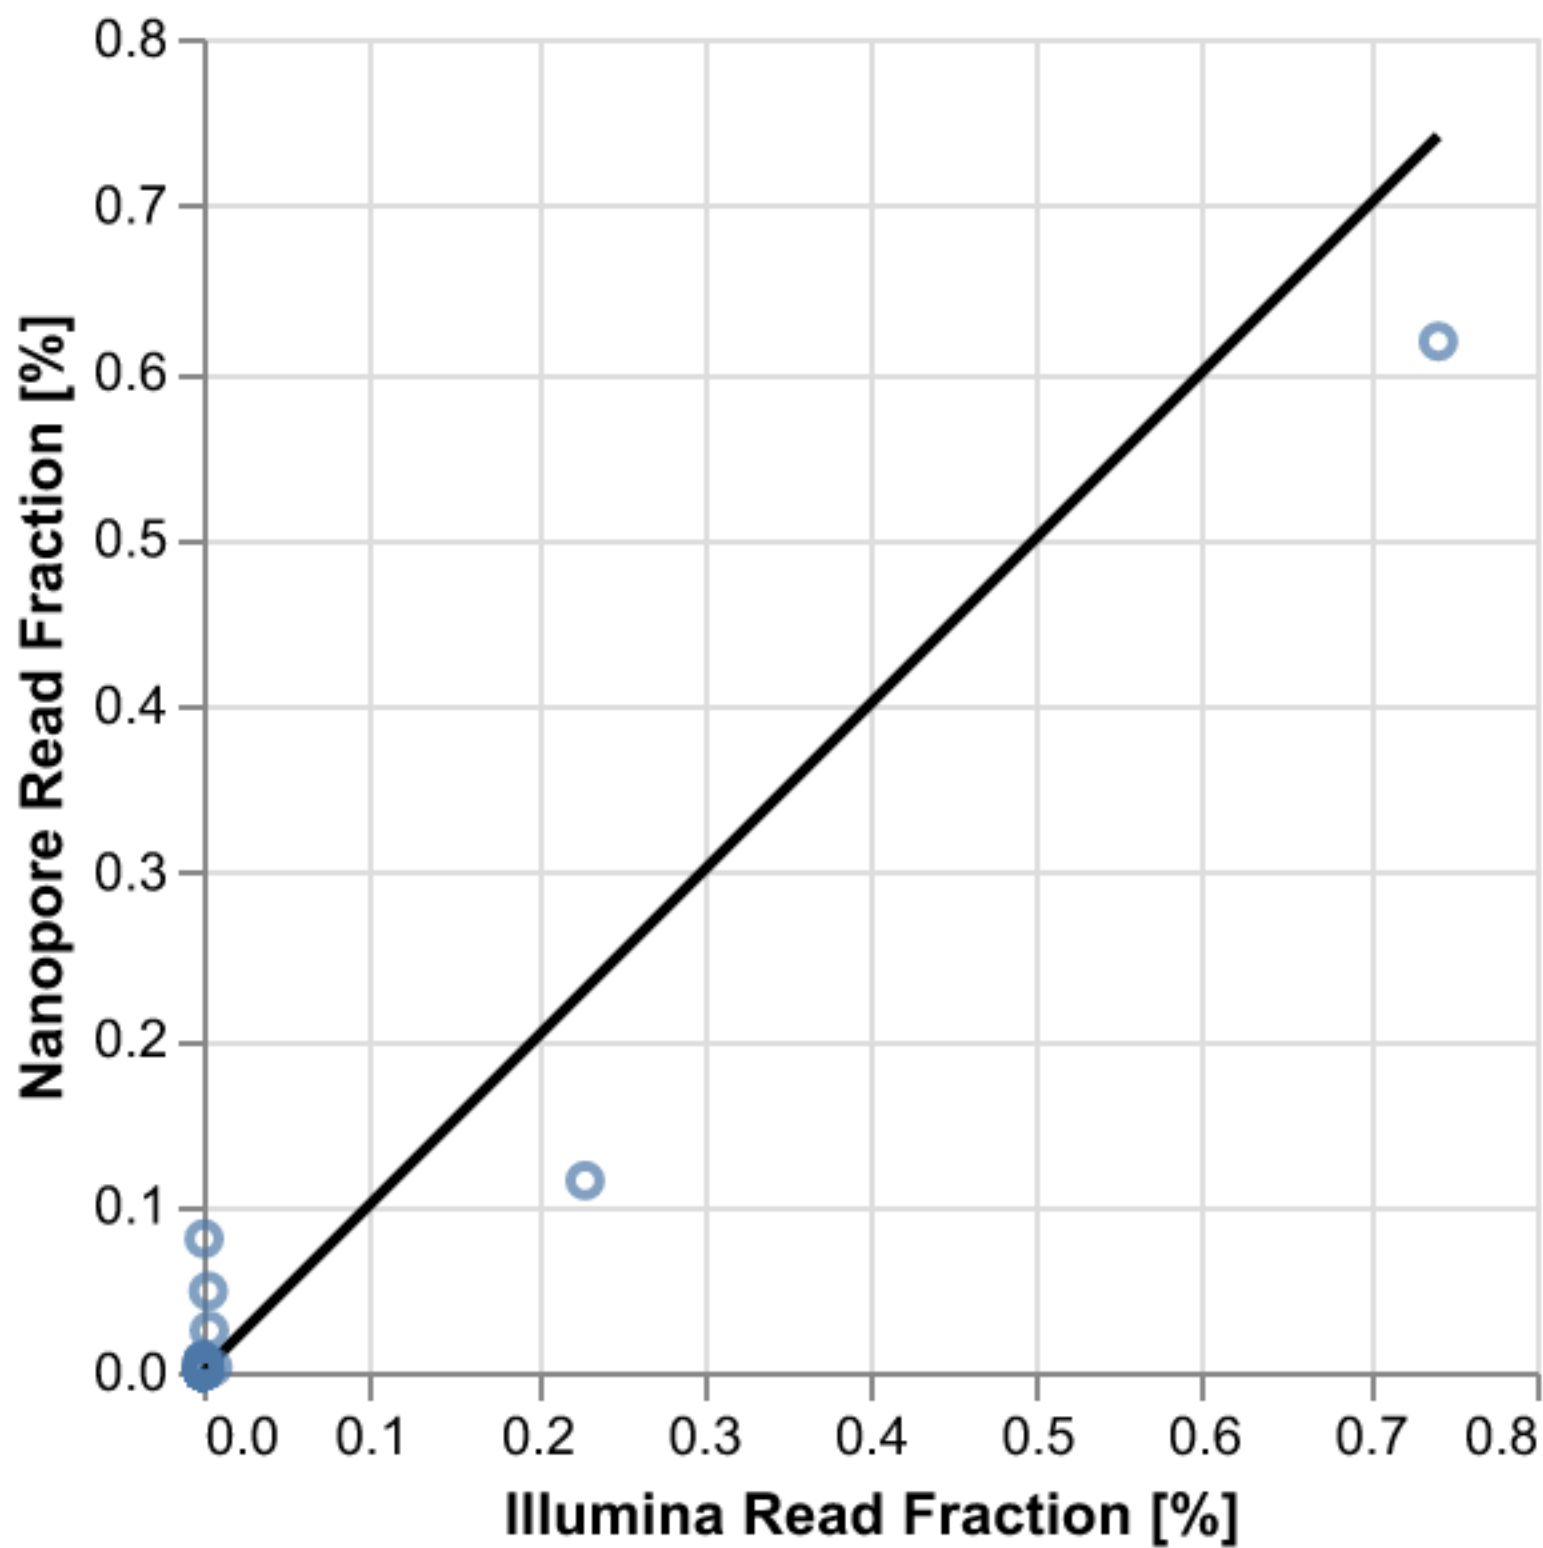



28\_1

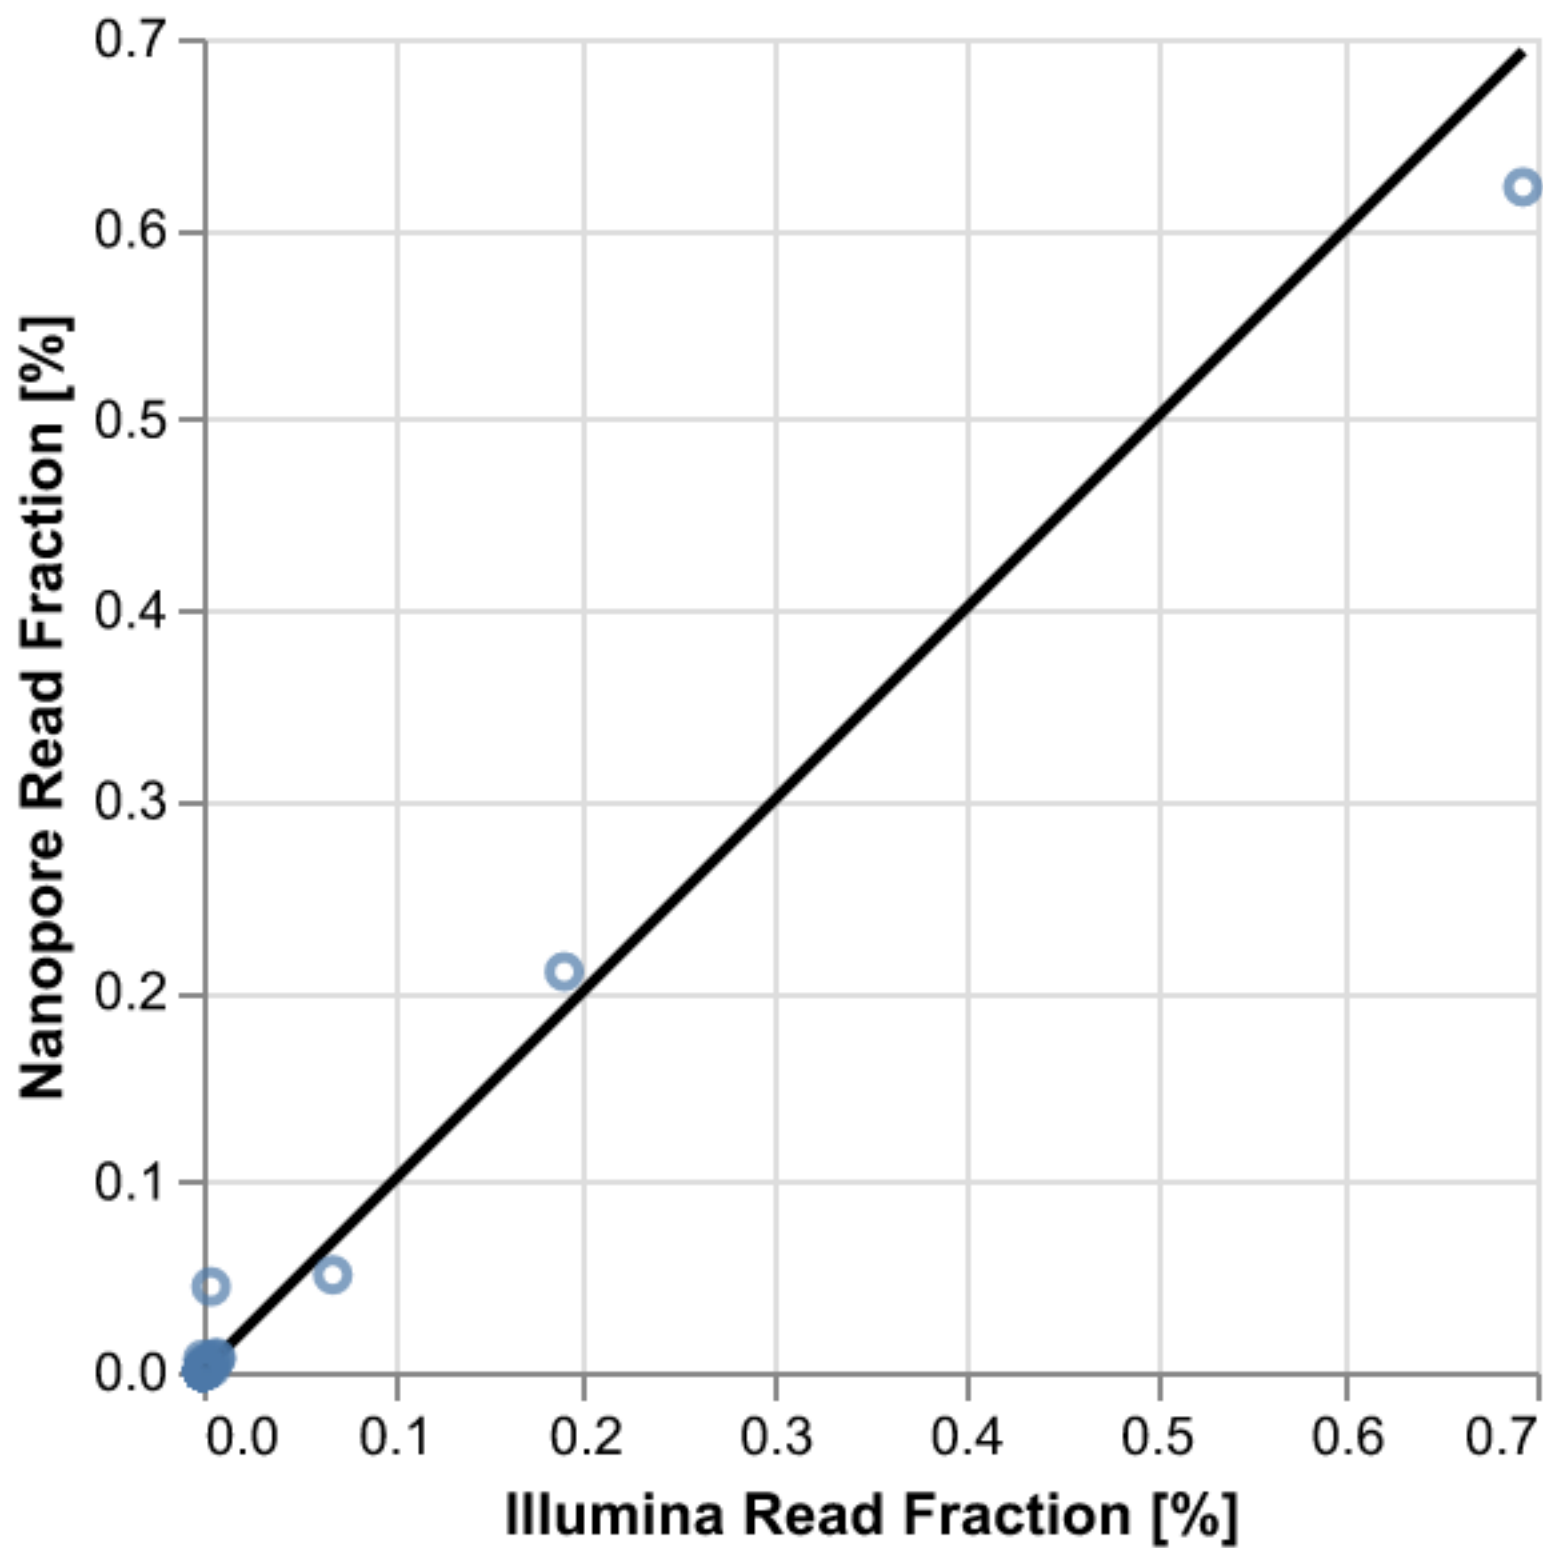

28\_21

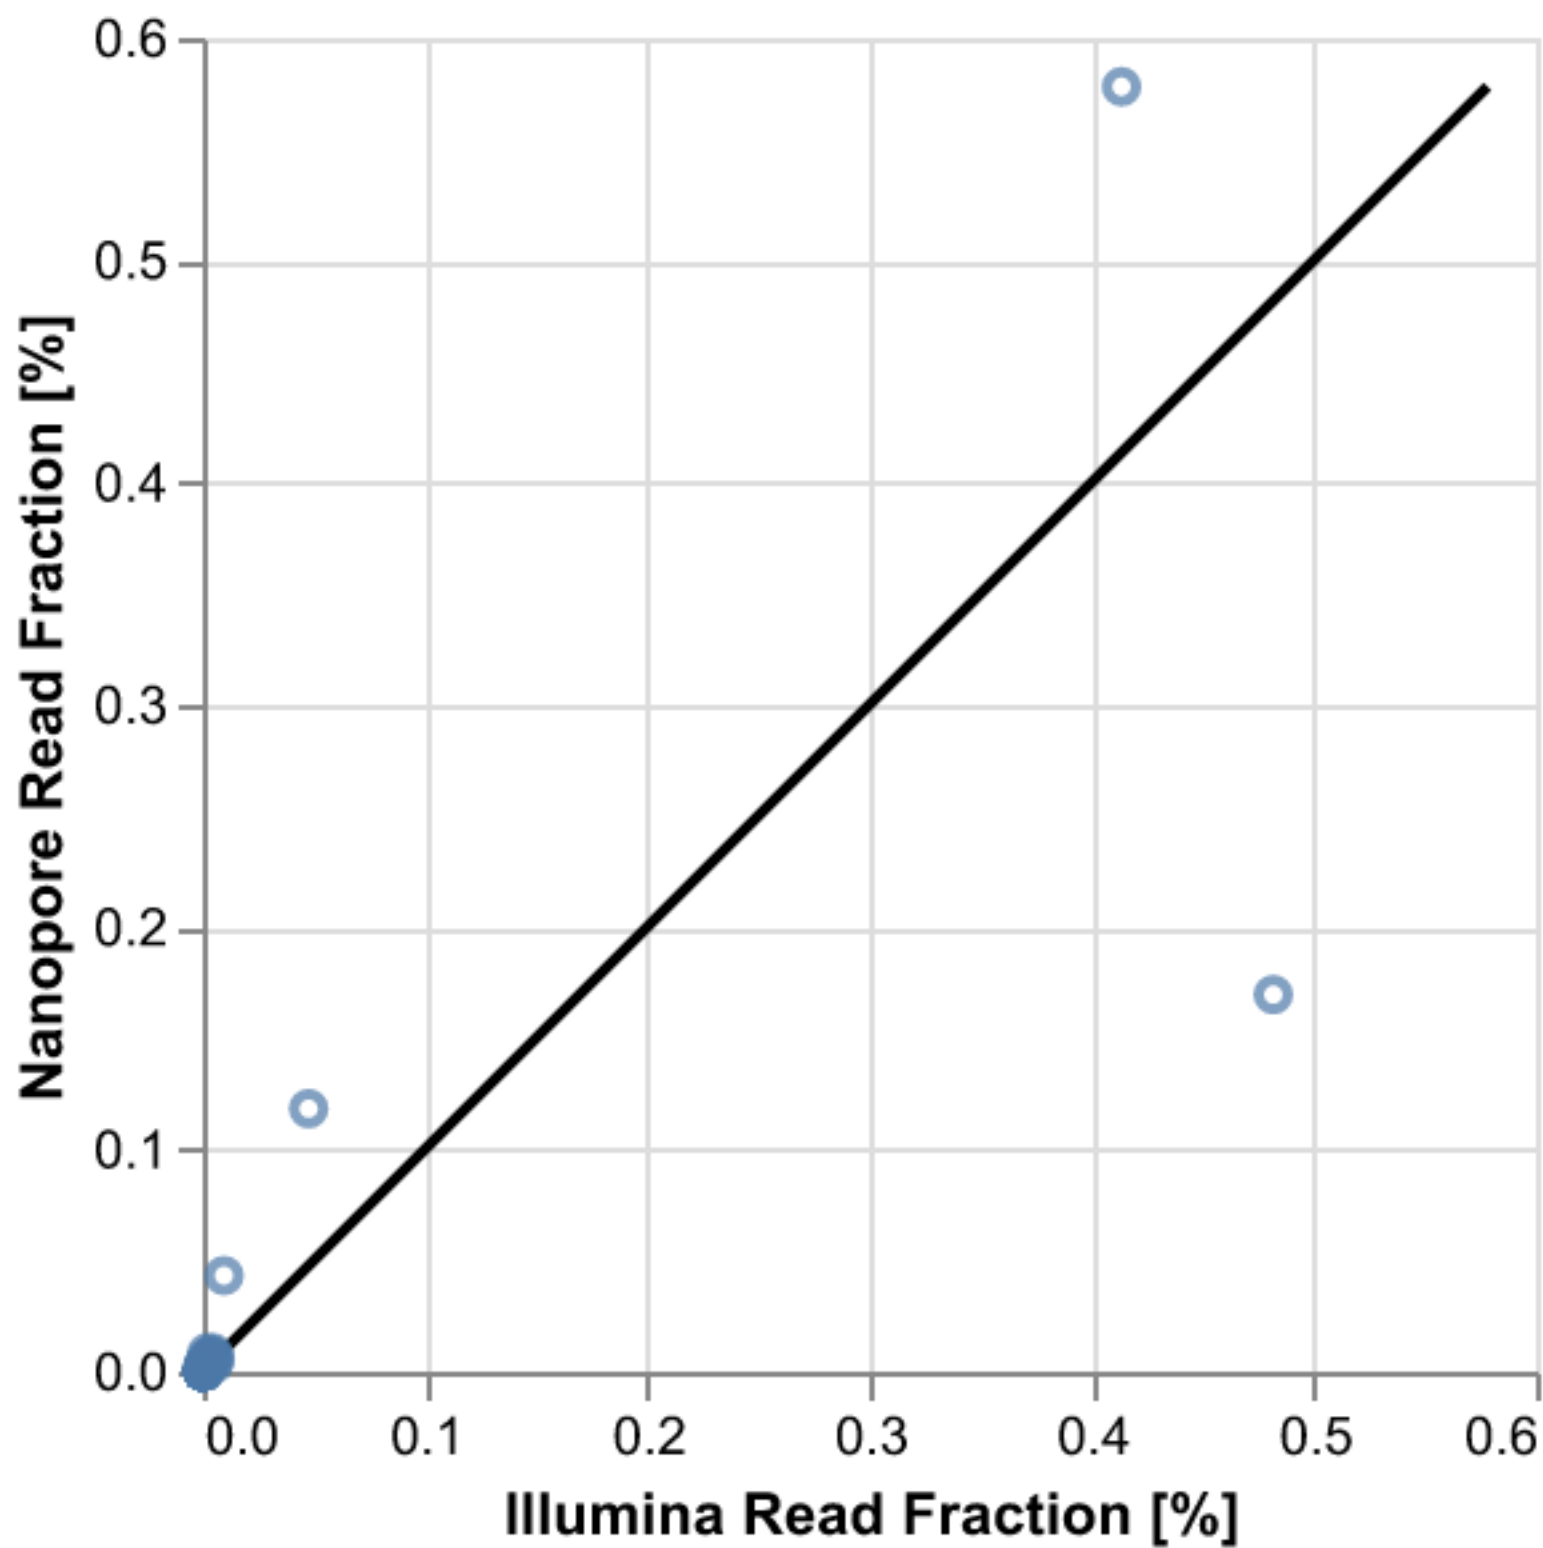

28\_237

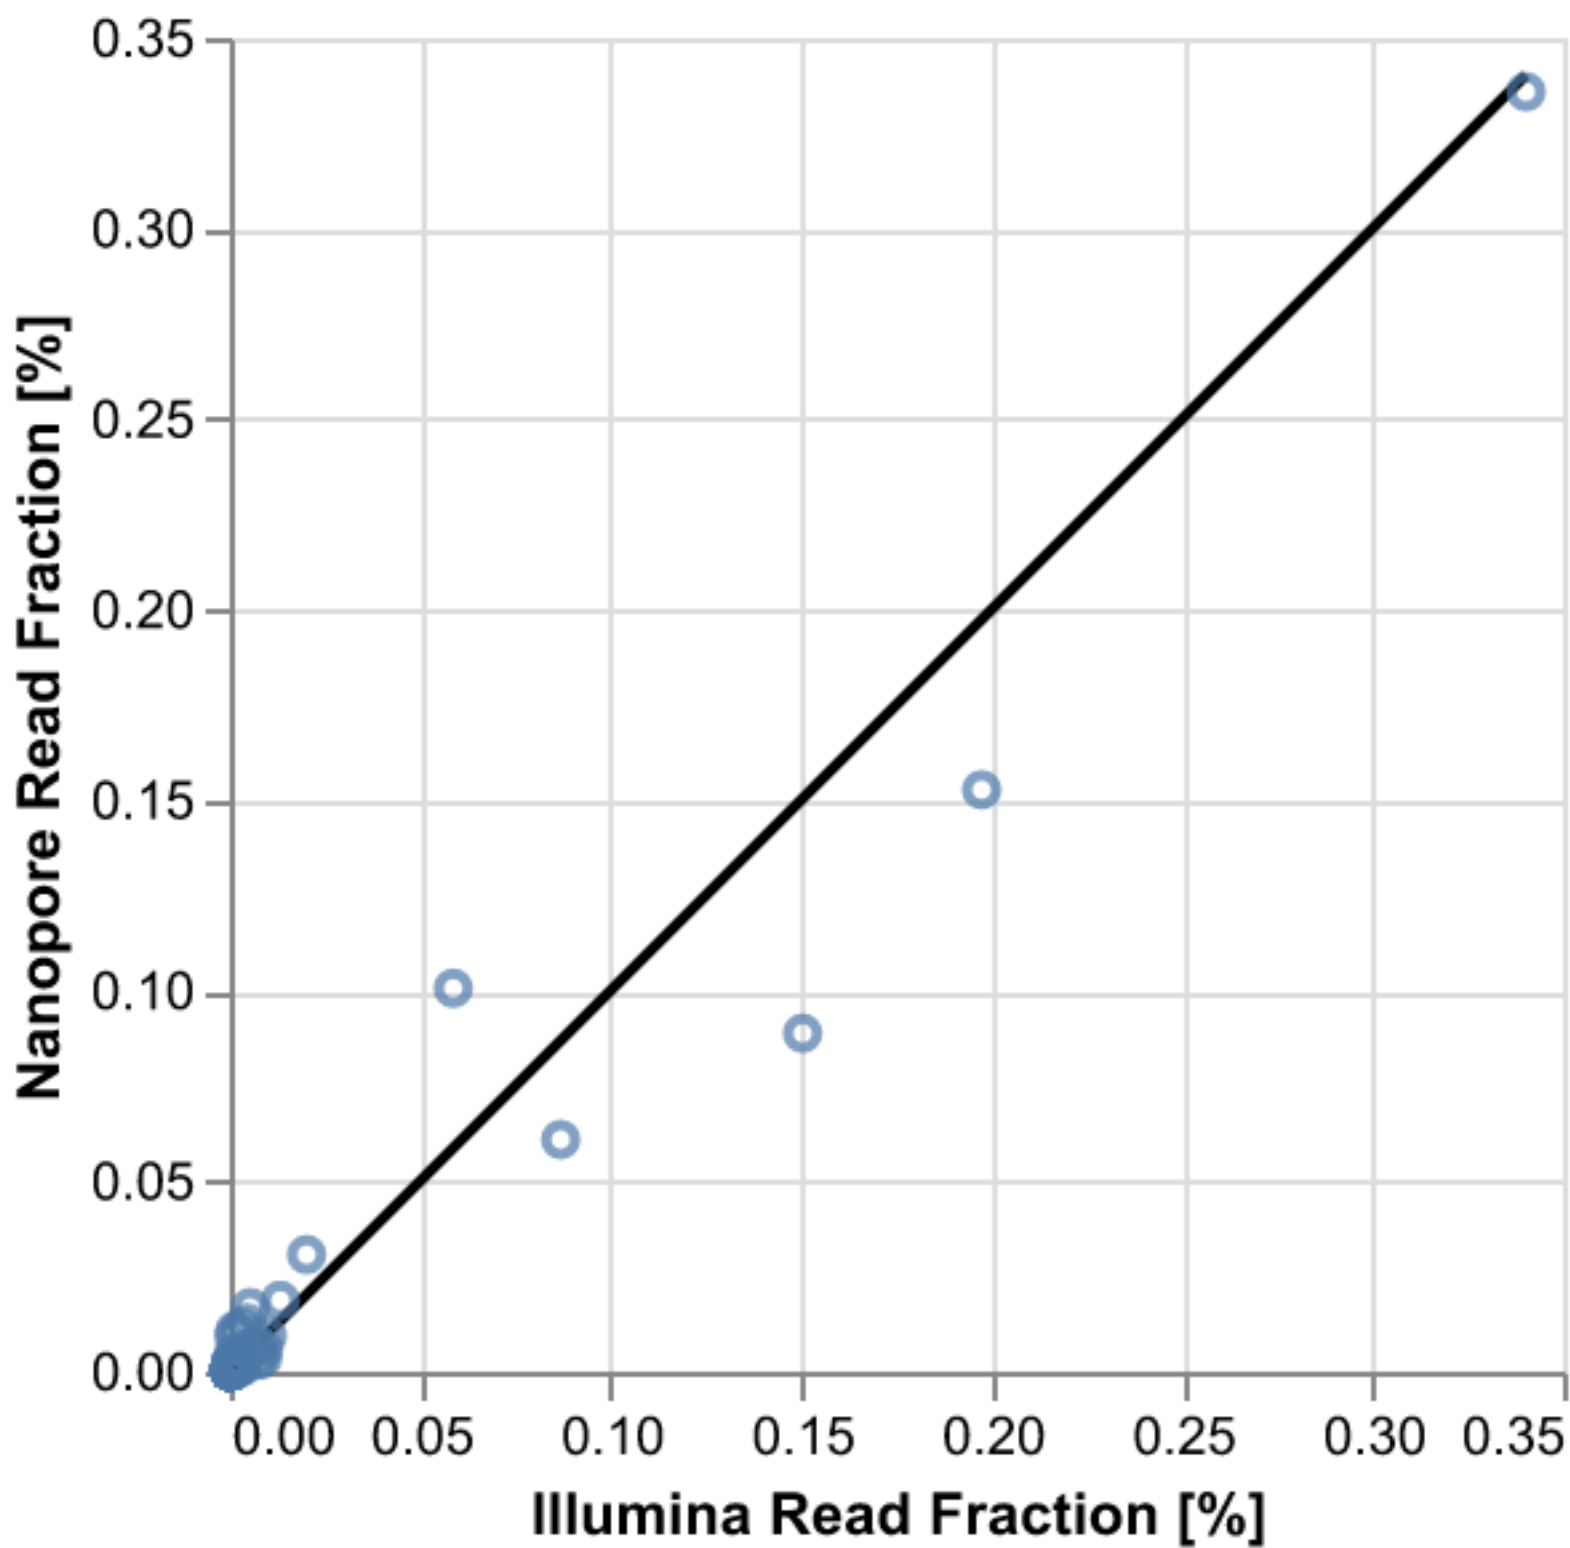

28\_-5

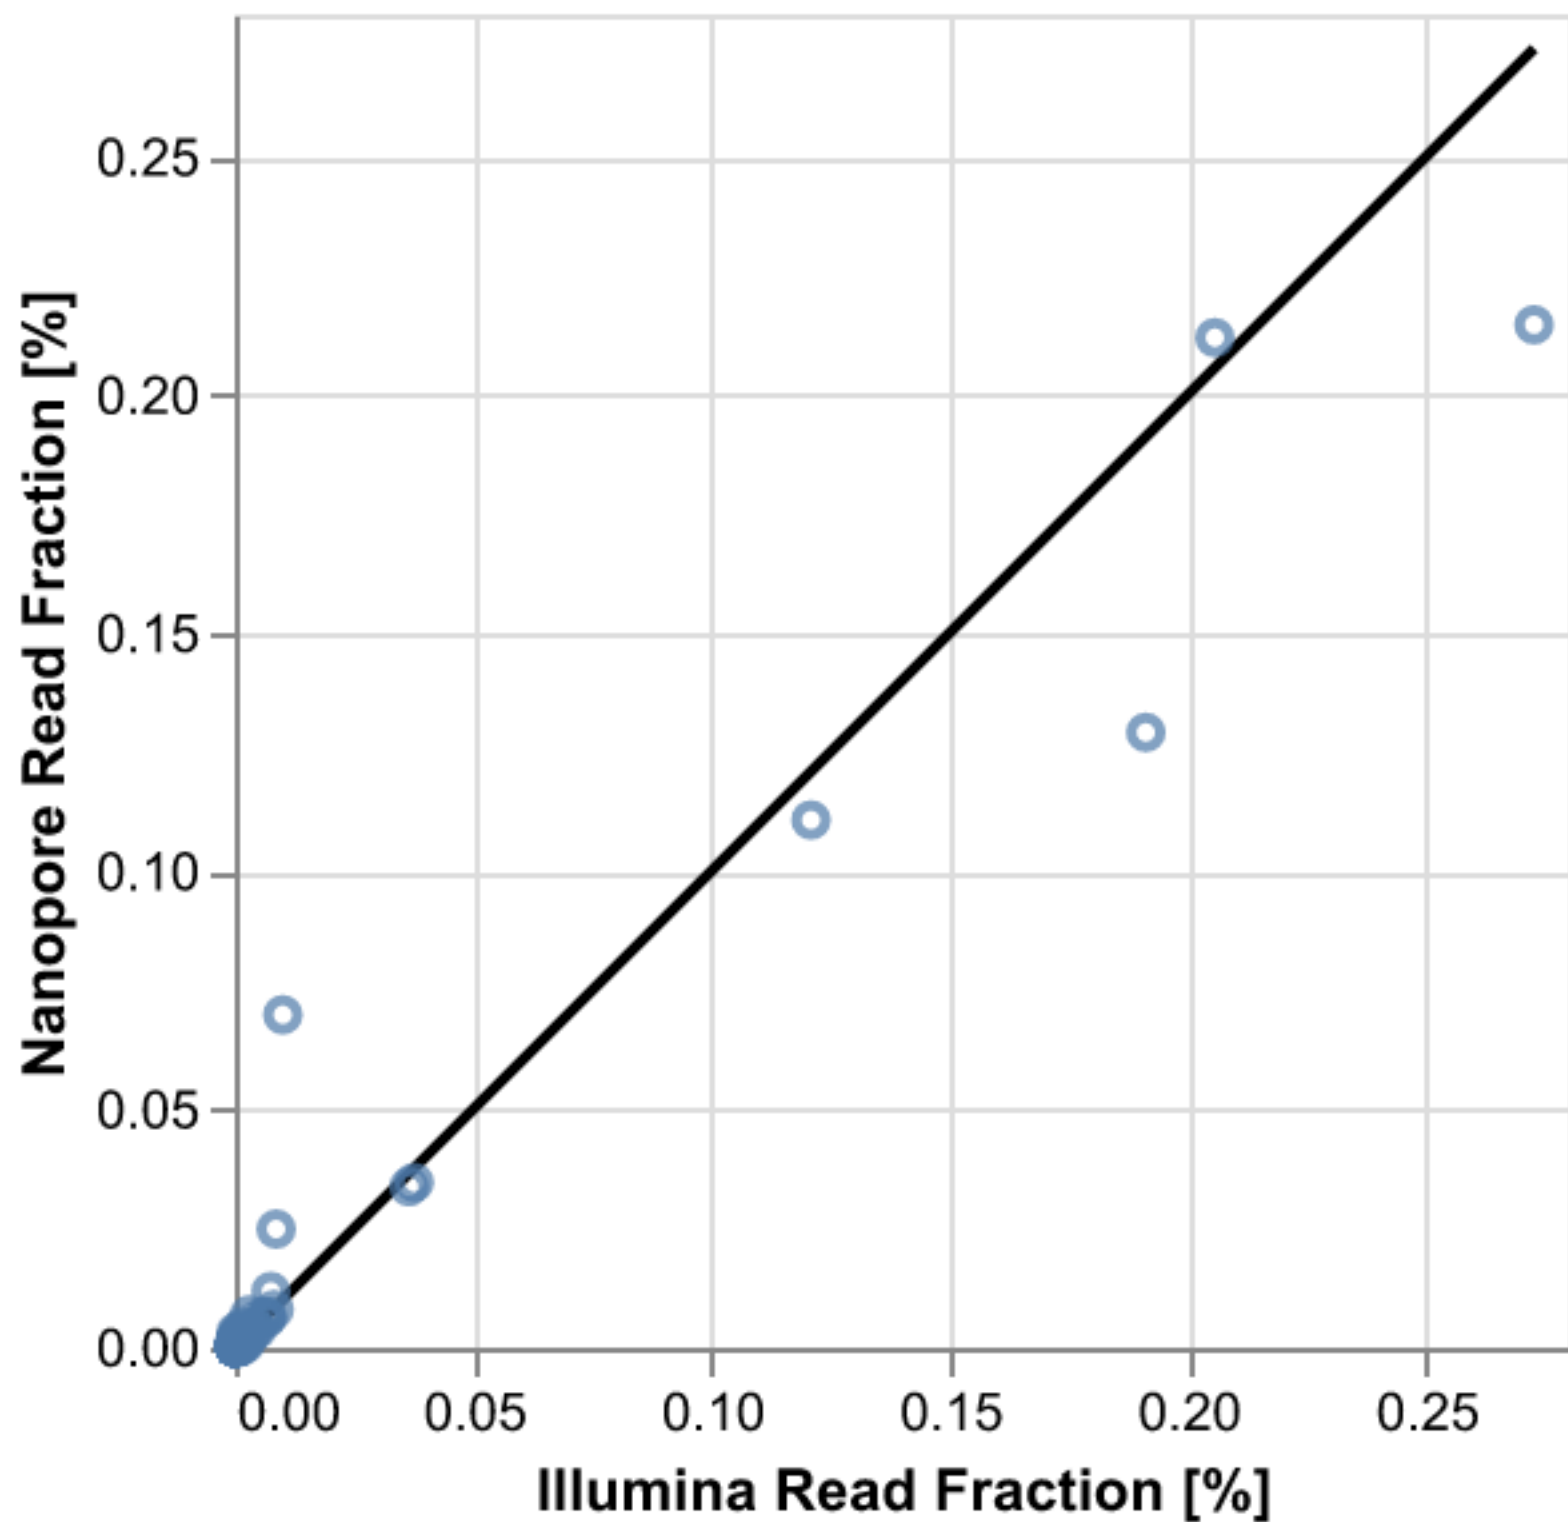

28\_63

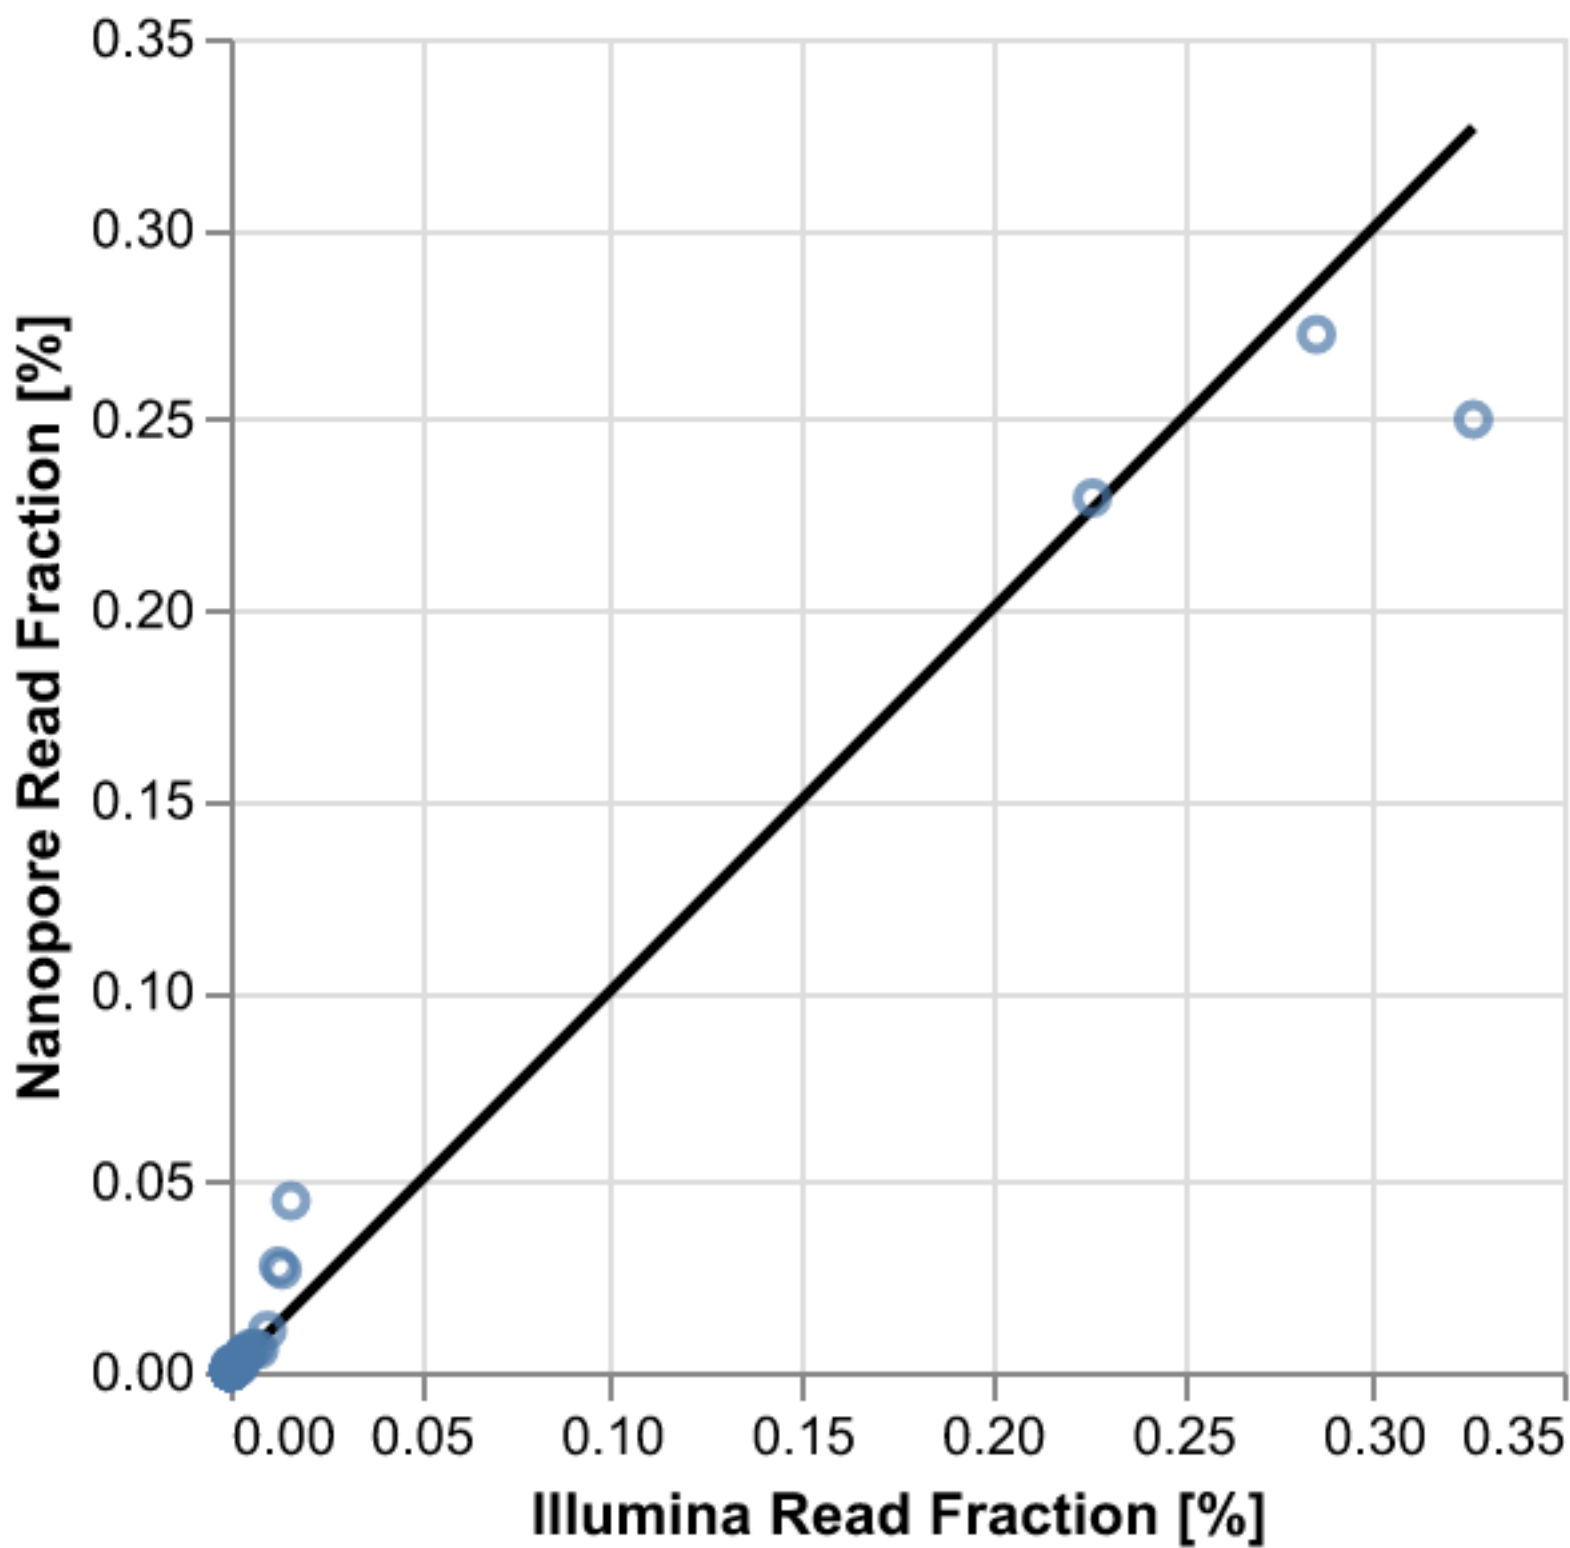

29\_15

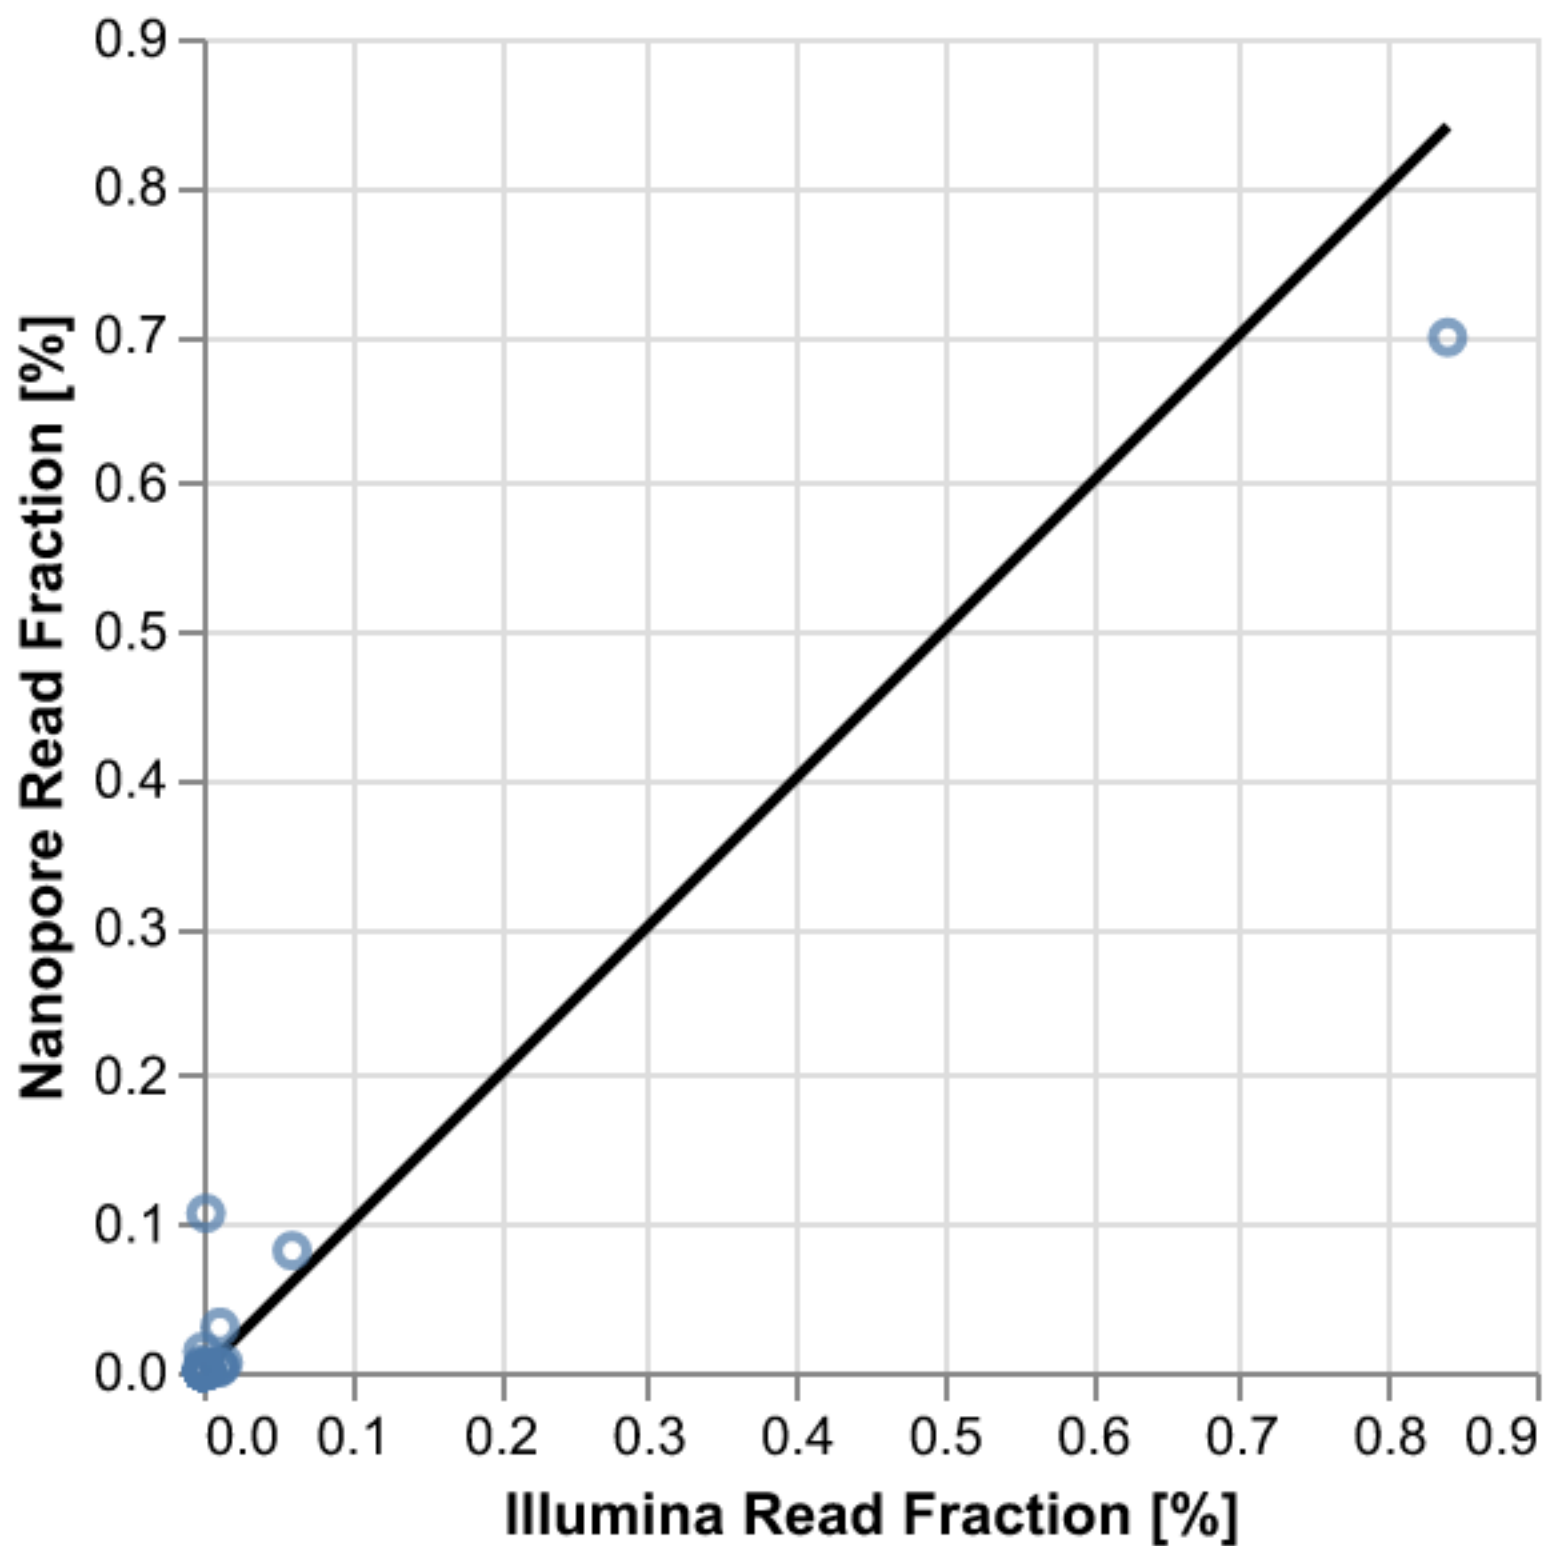

29\_186

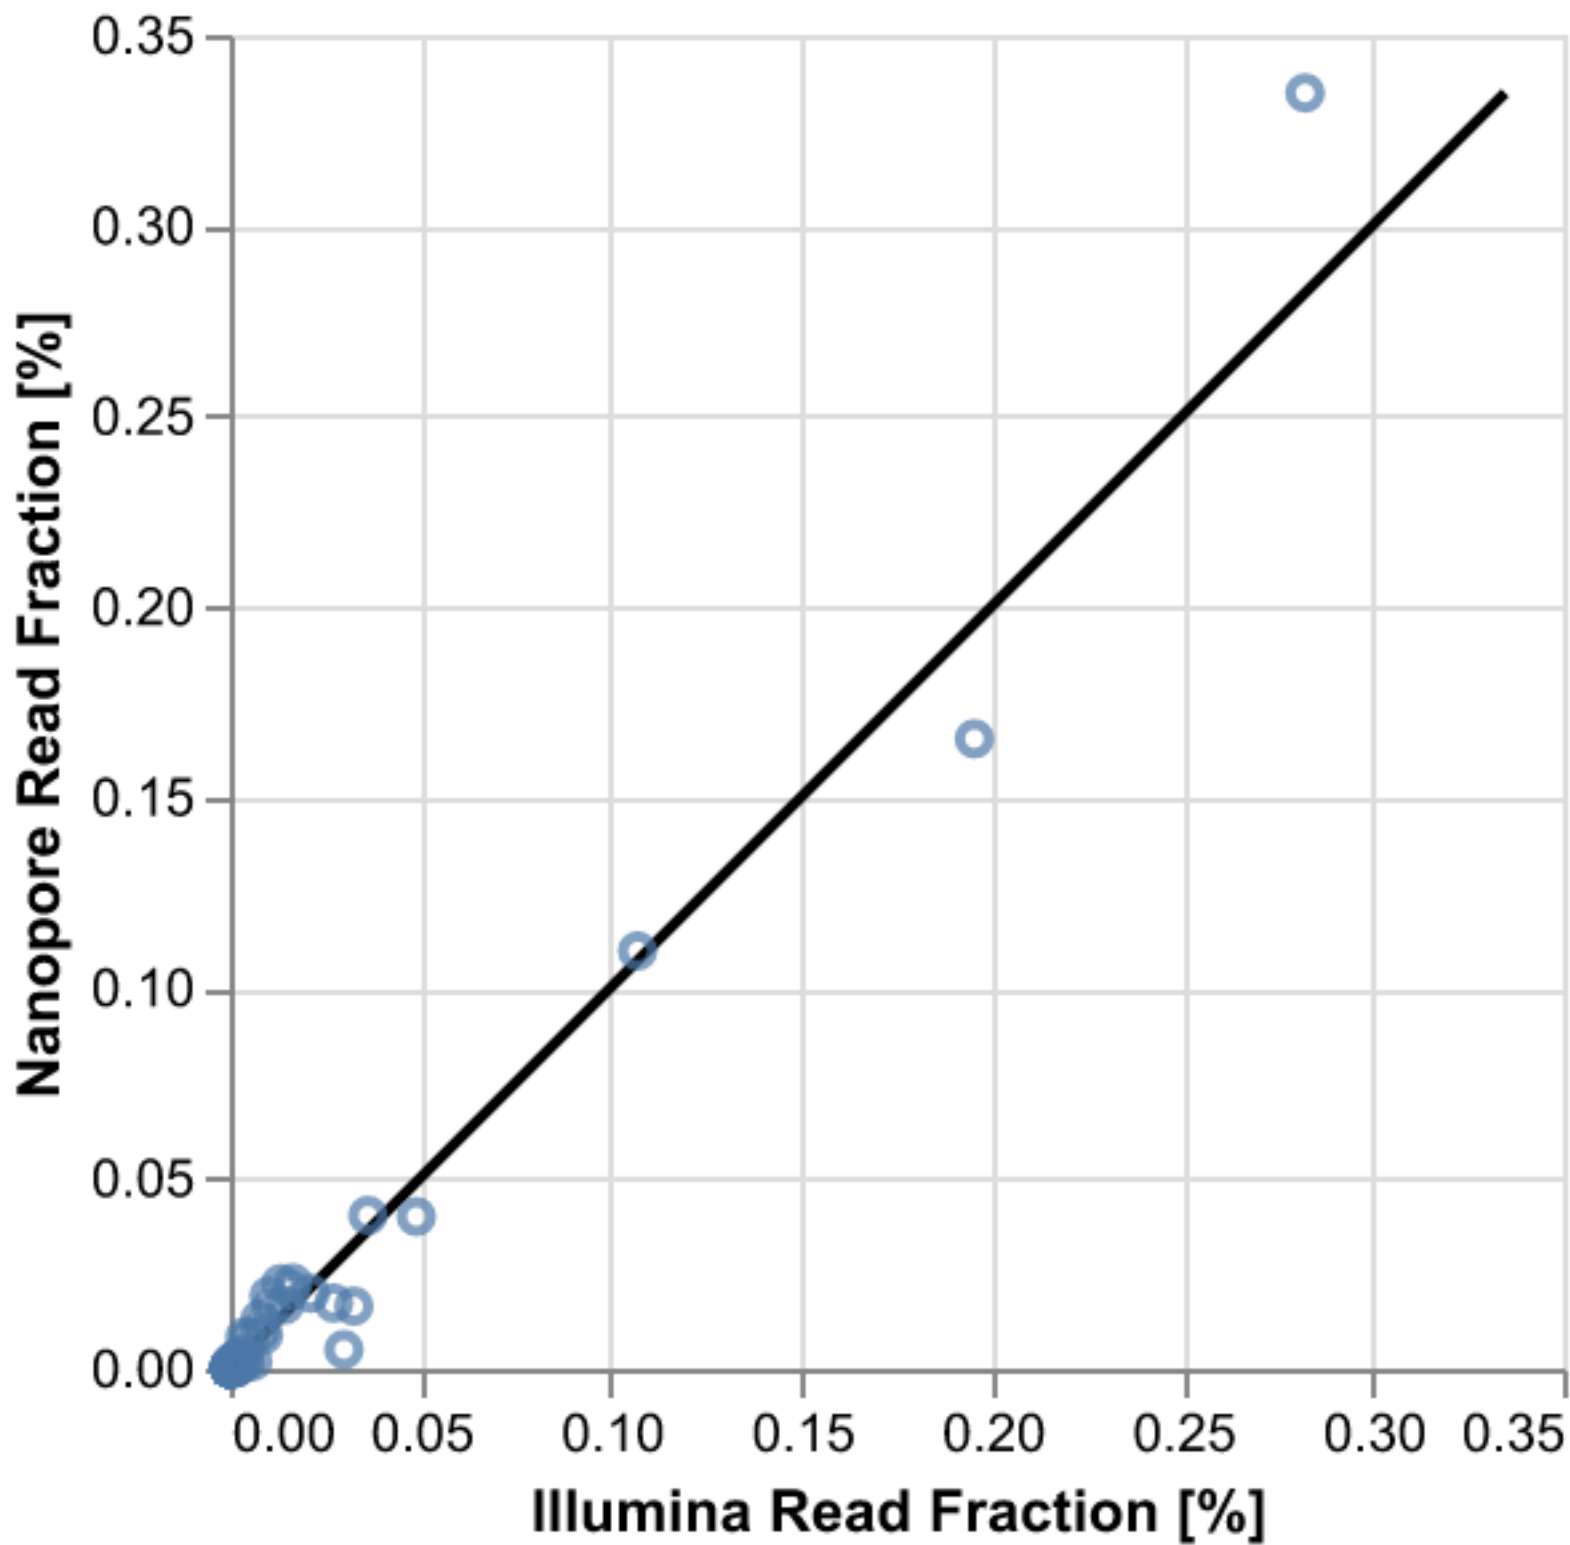

29\_1

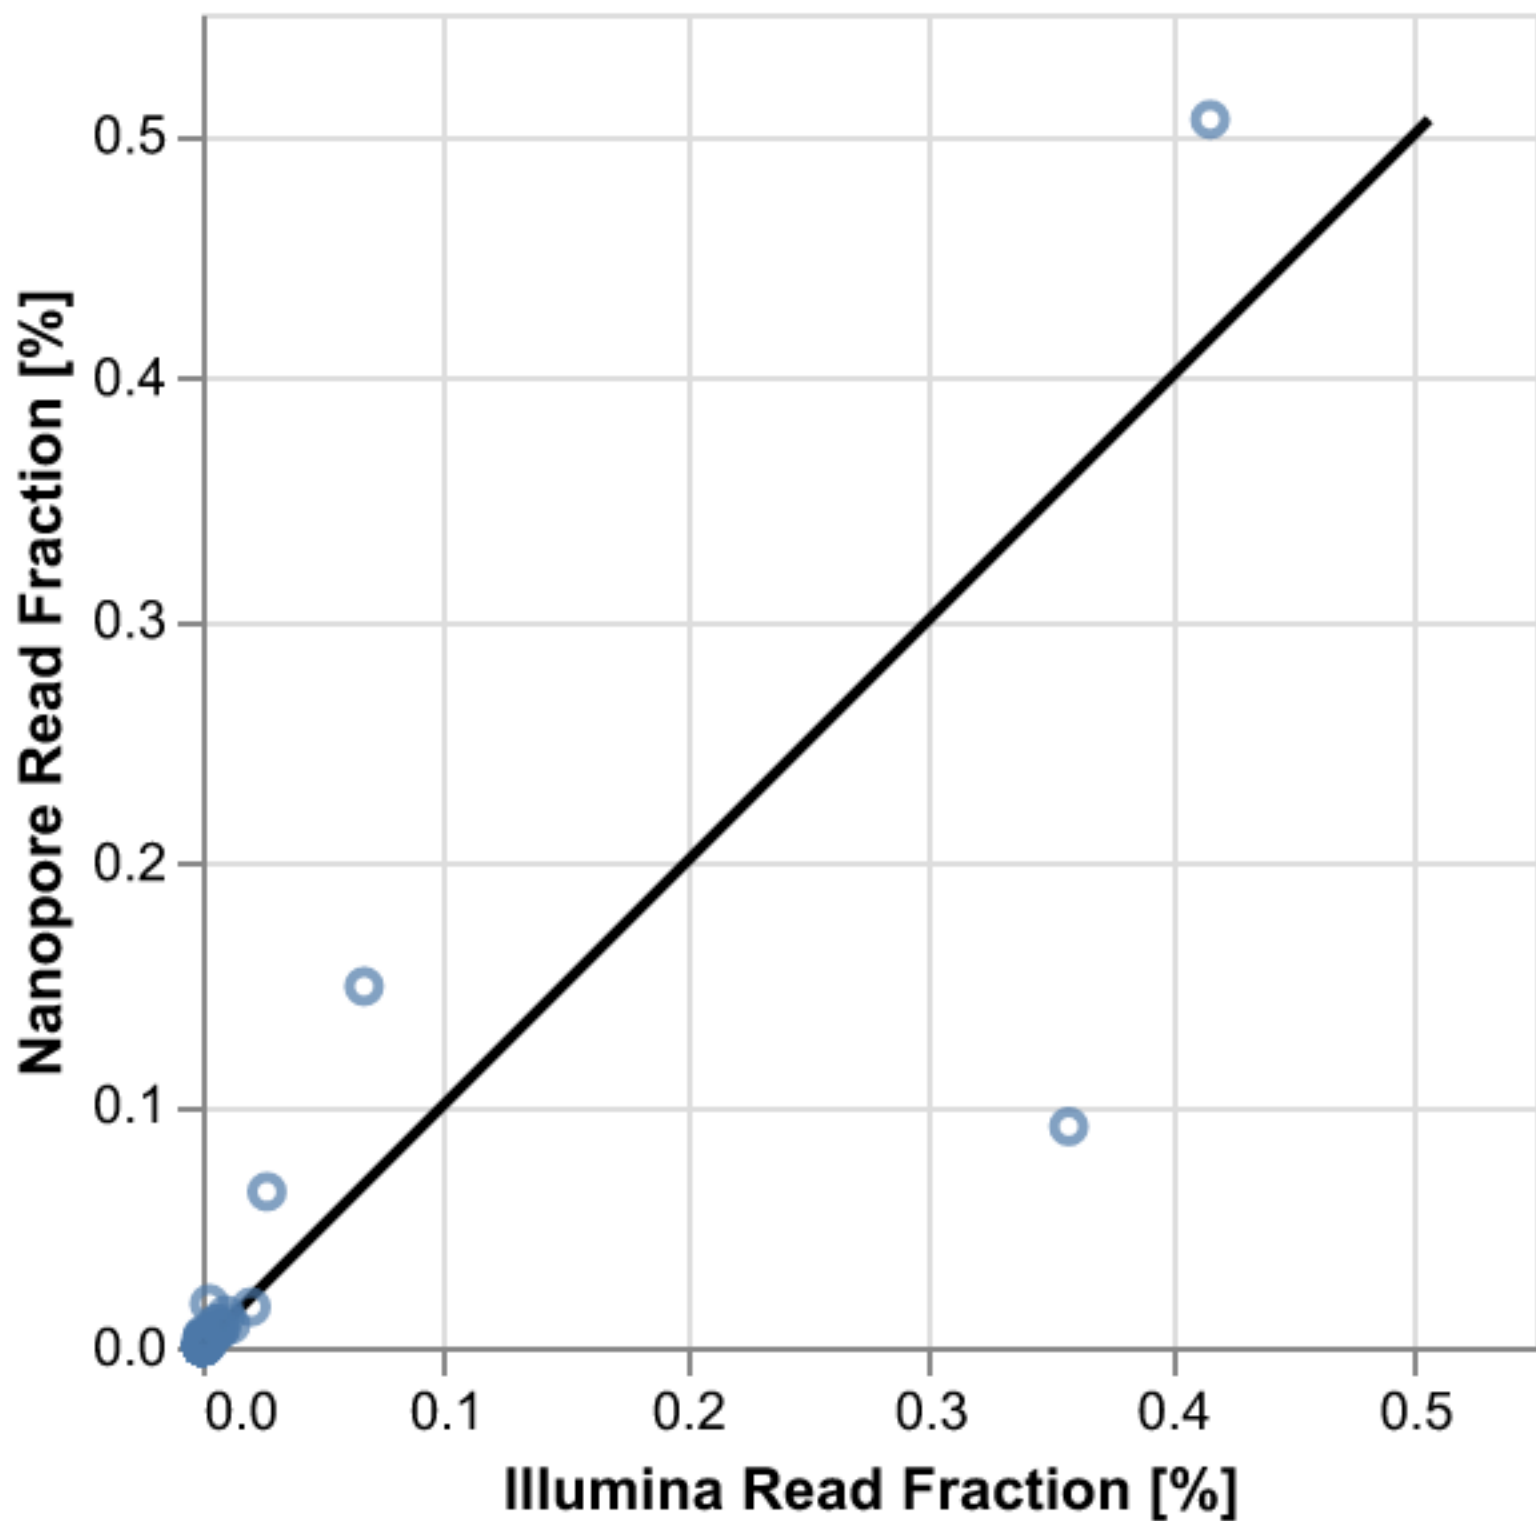





31\_58

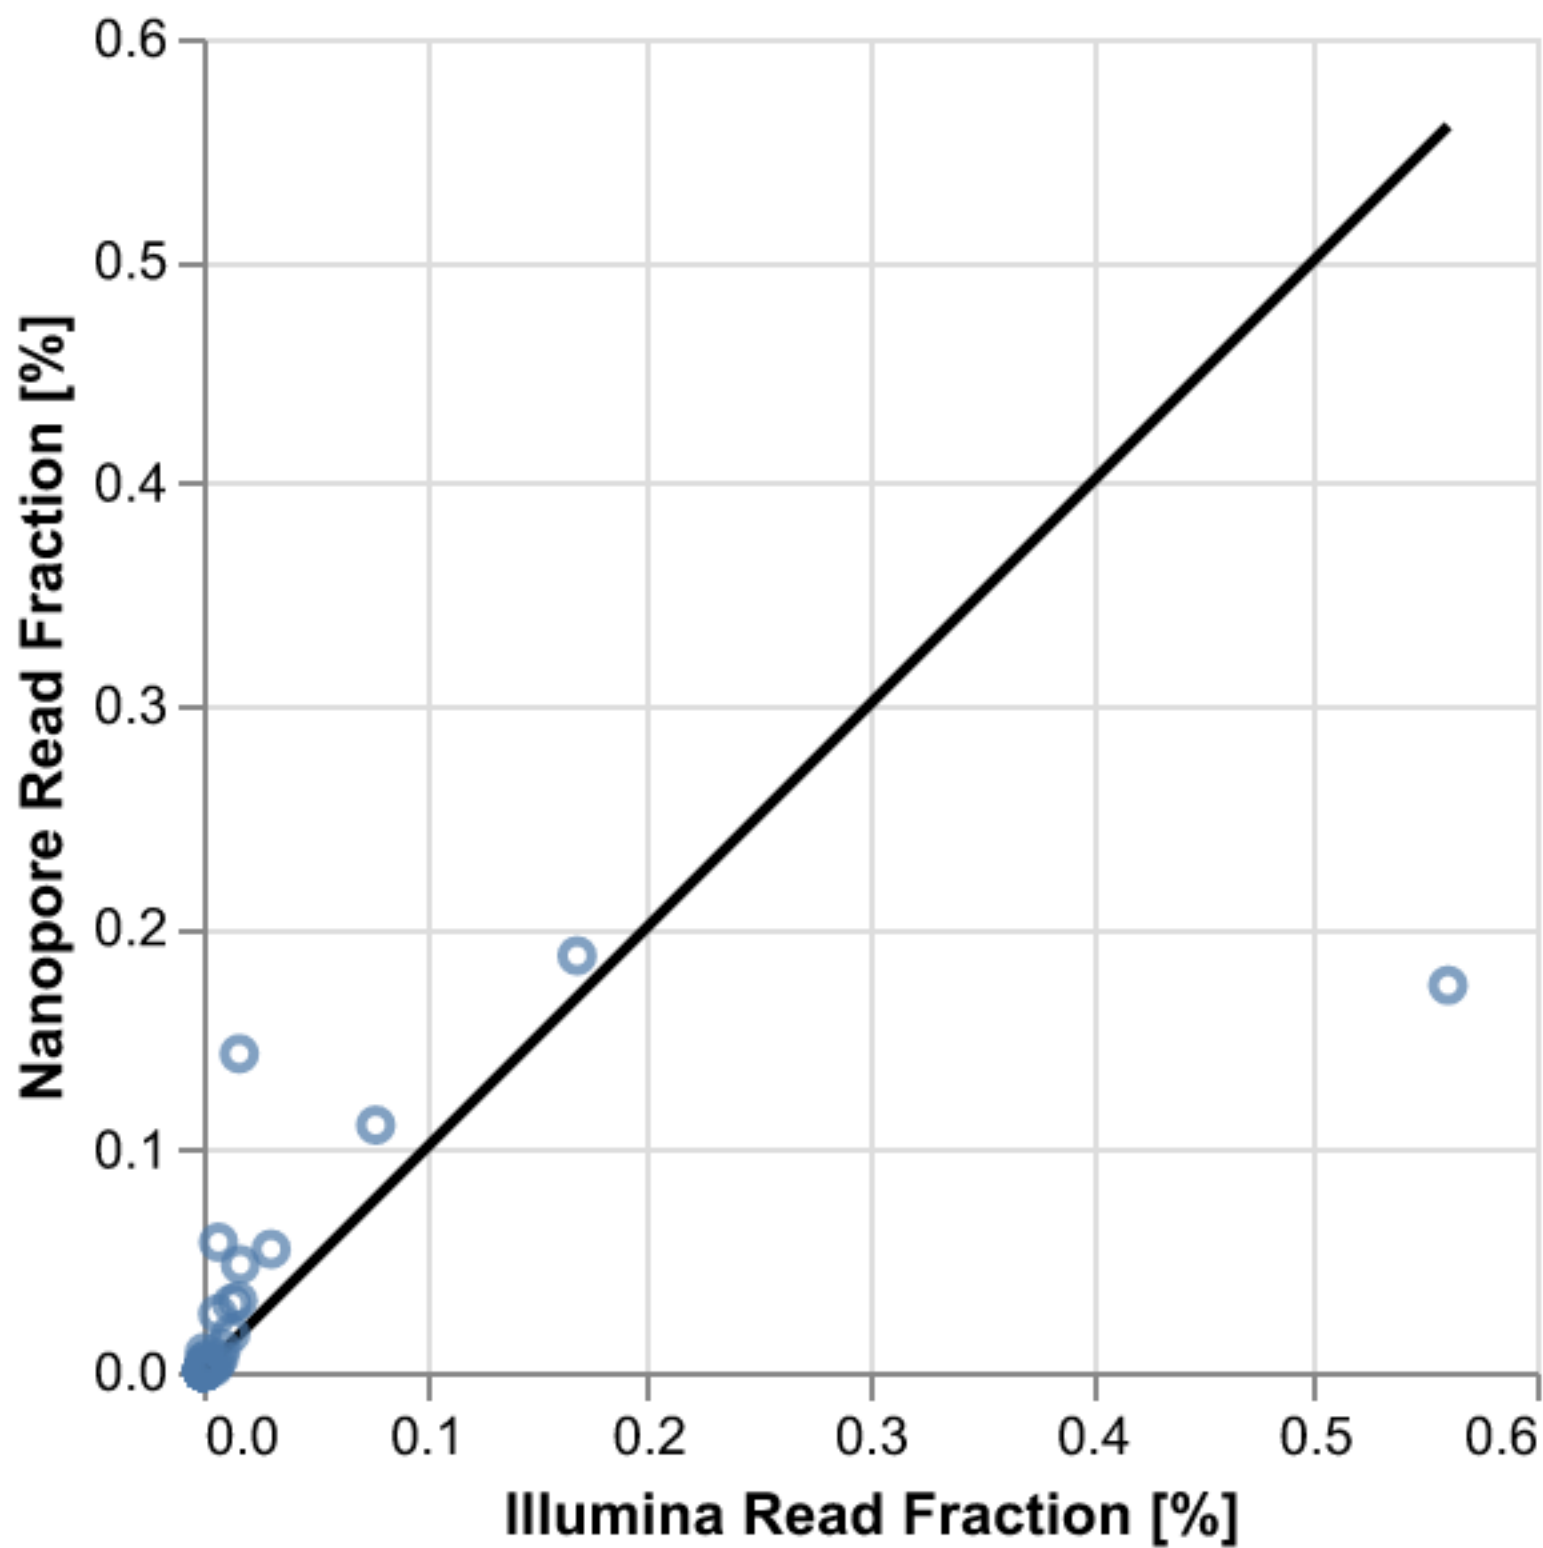

31\_-6

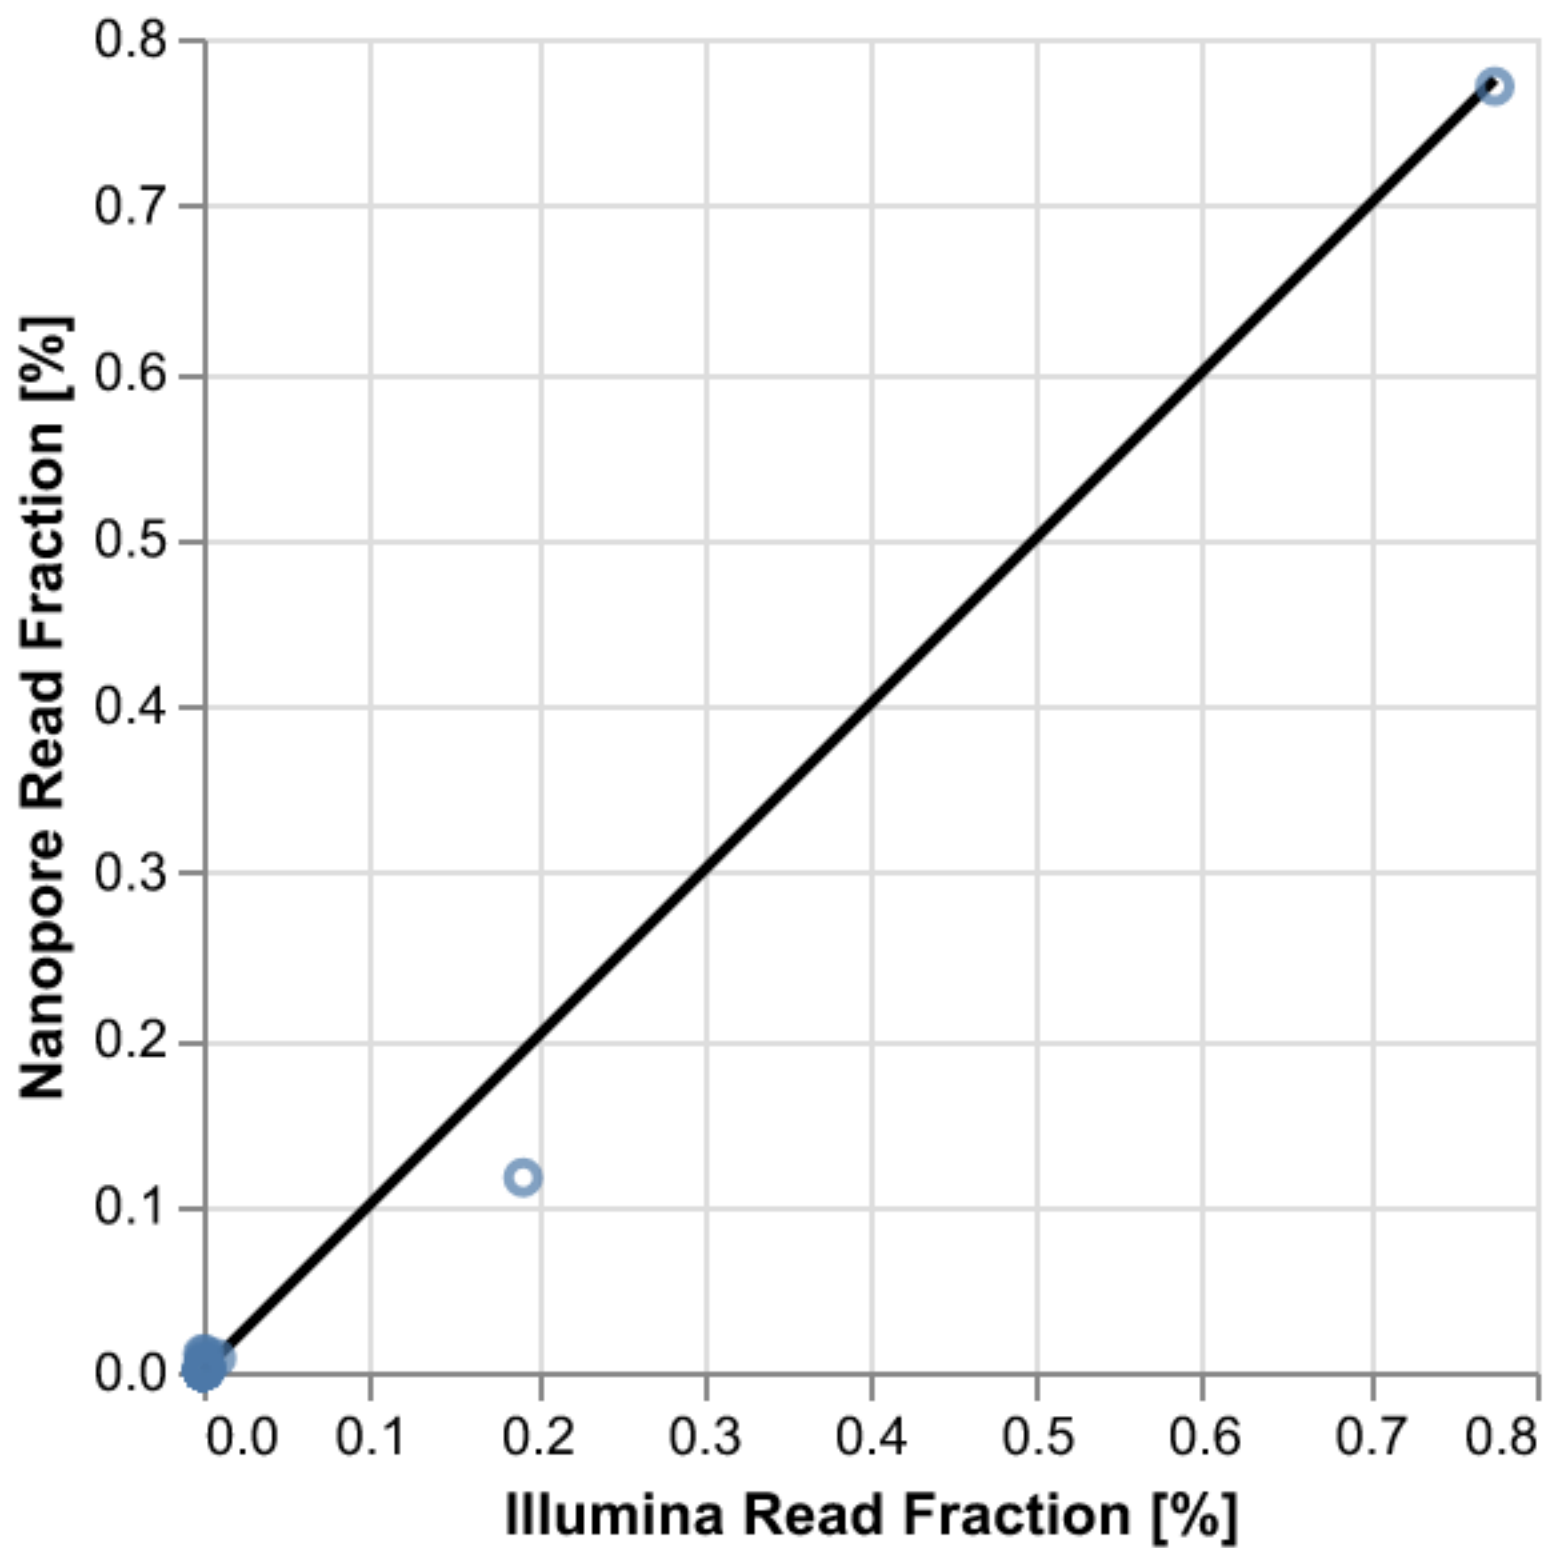

34\_10

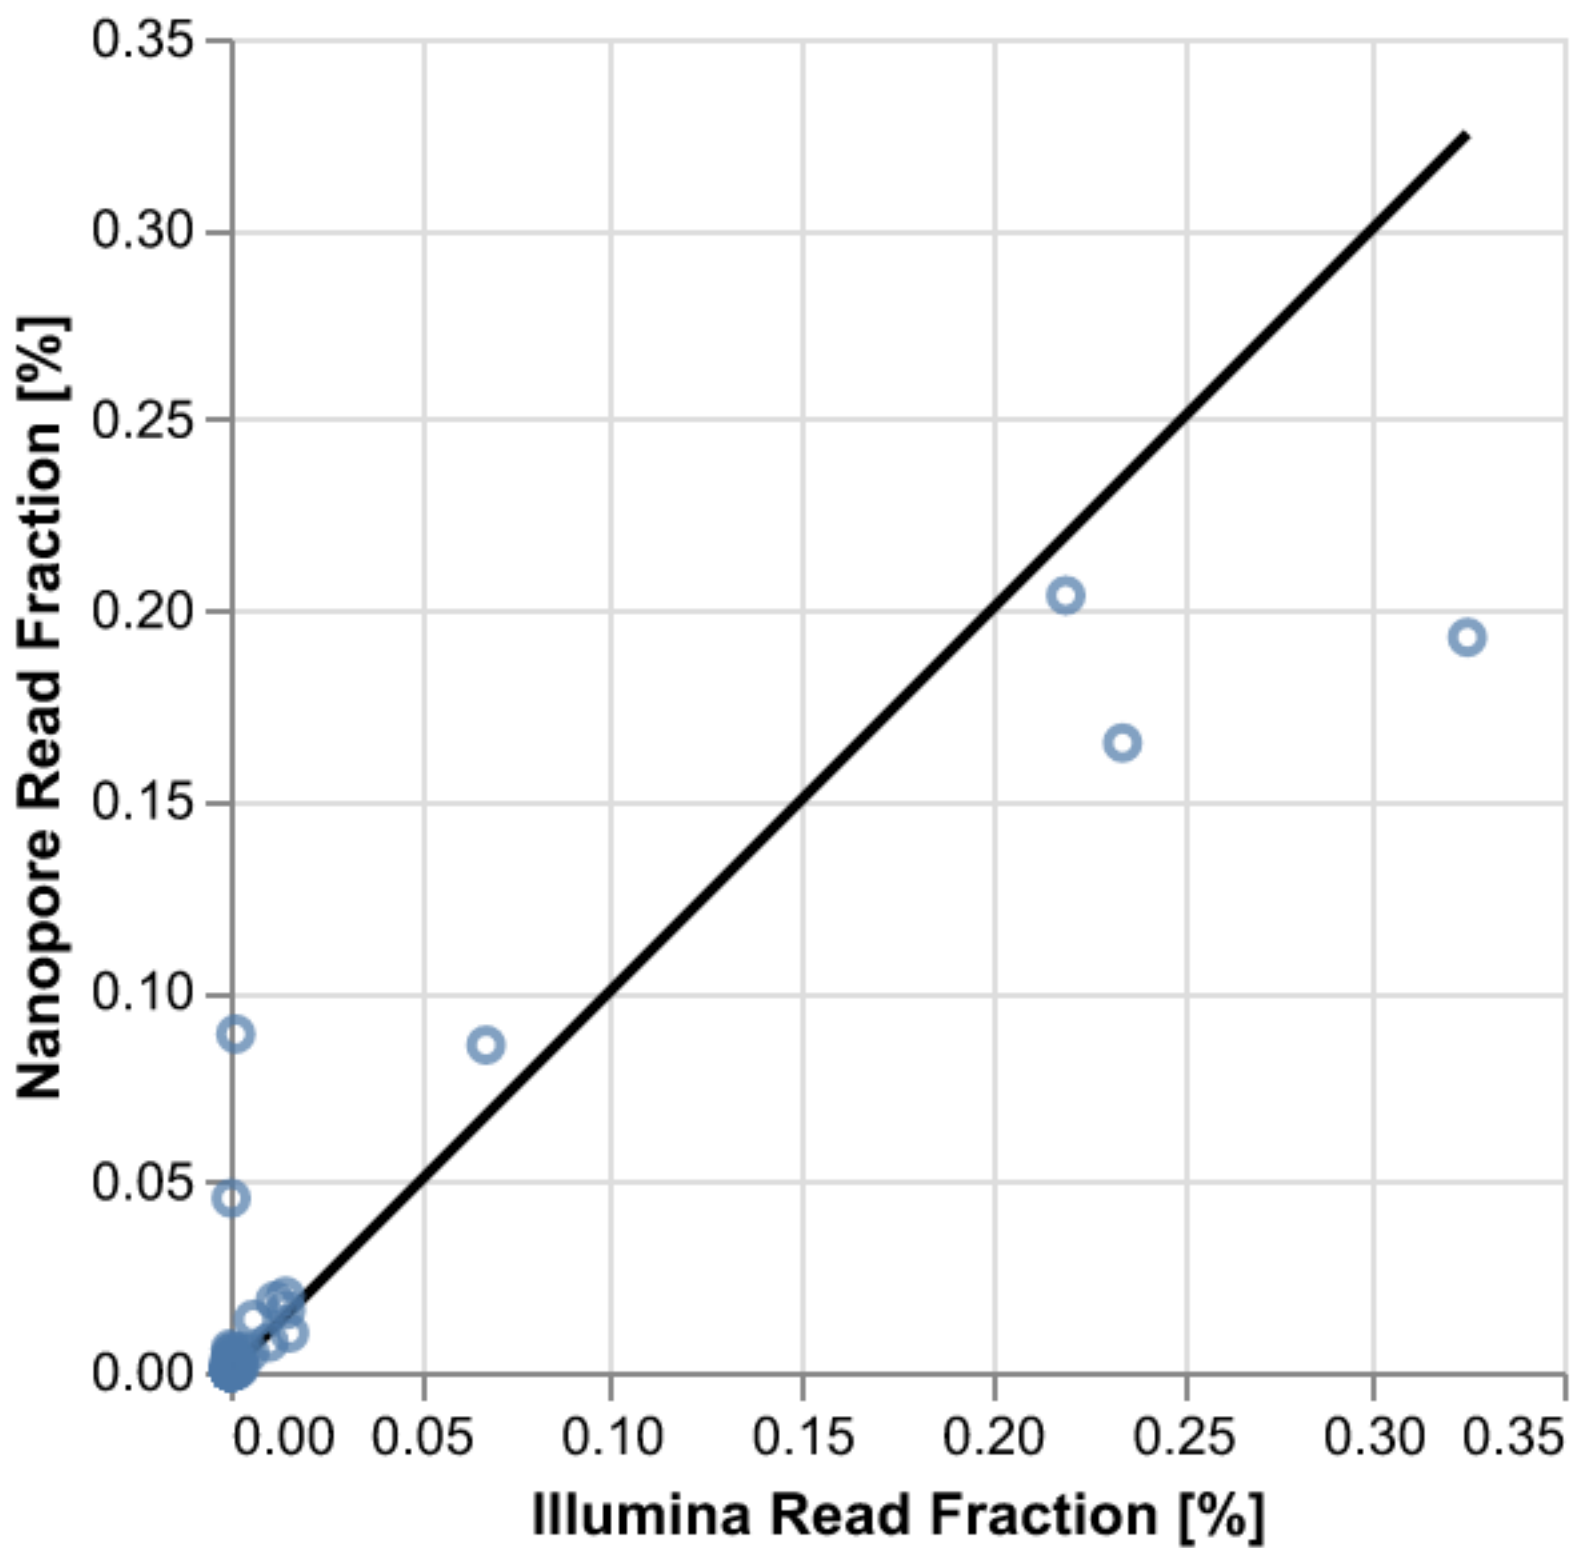

34\_18

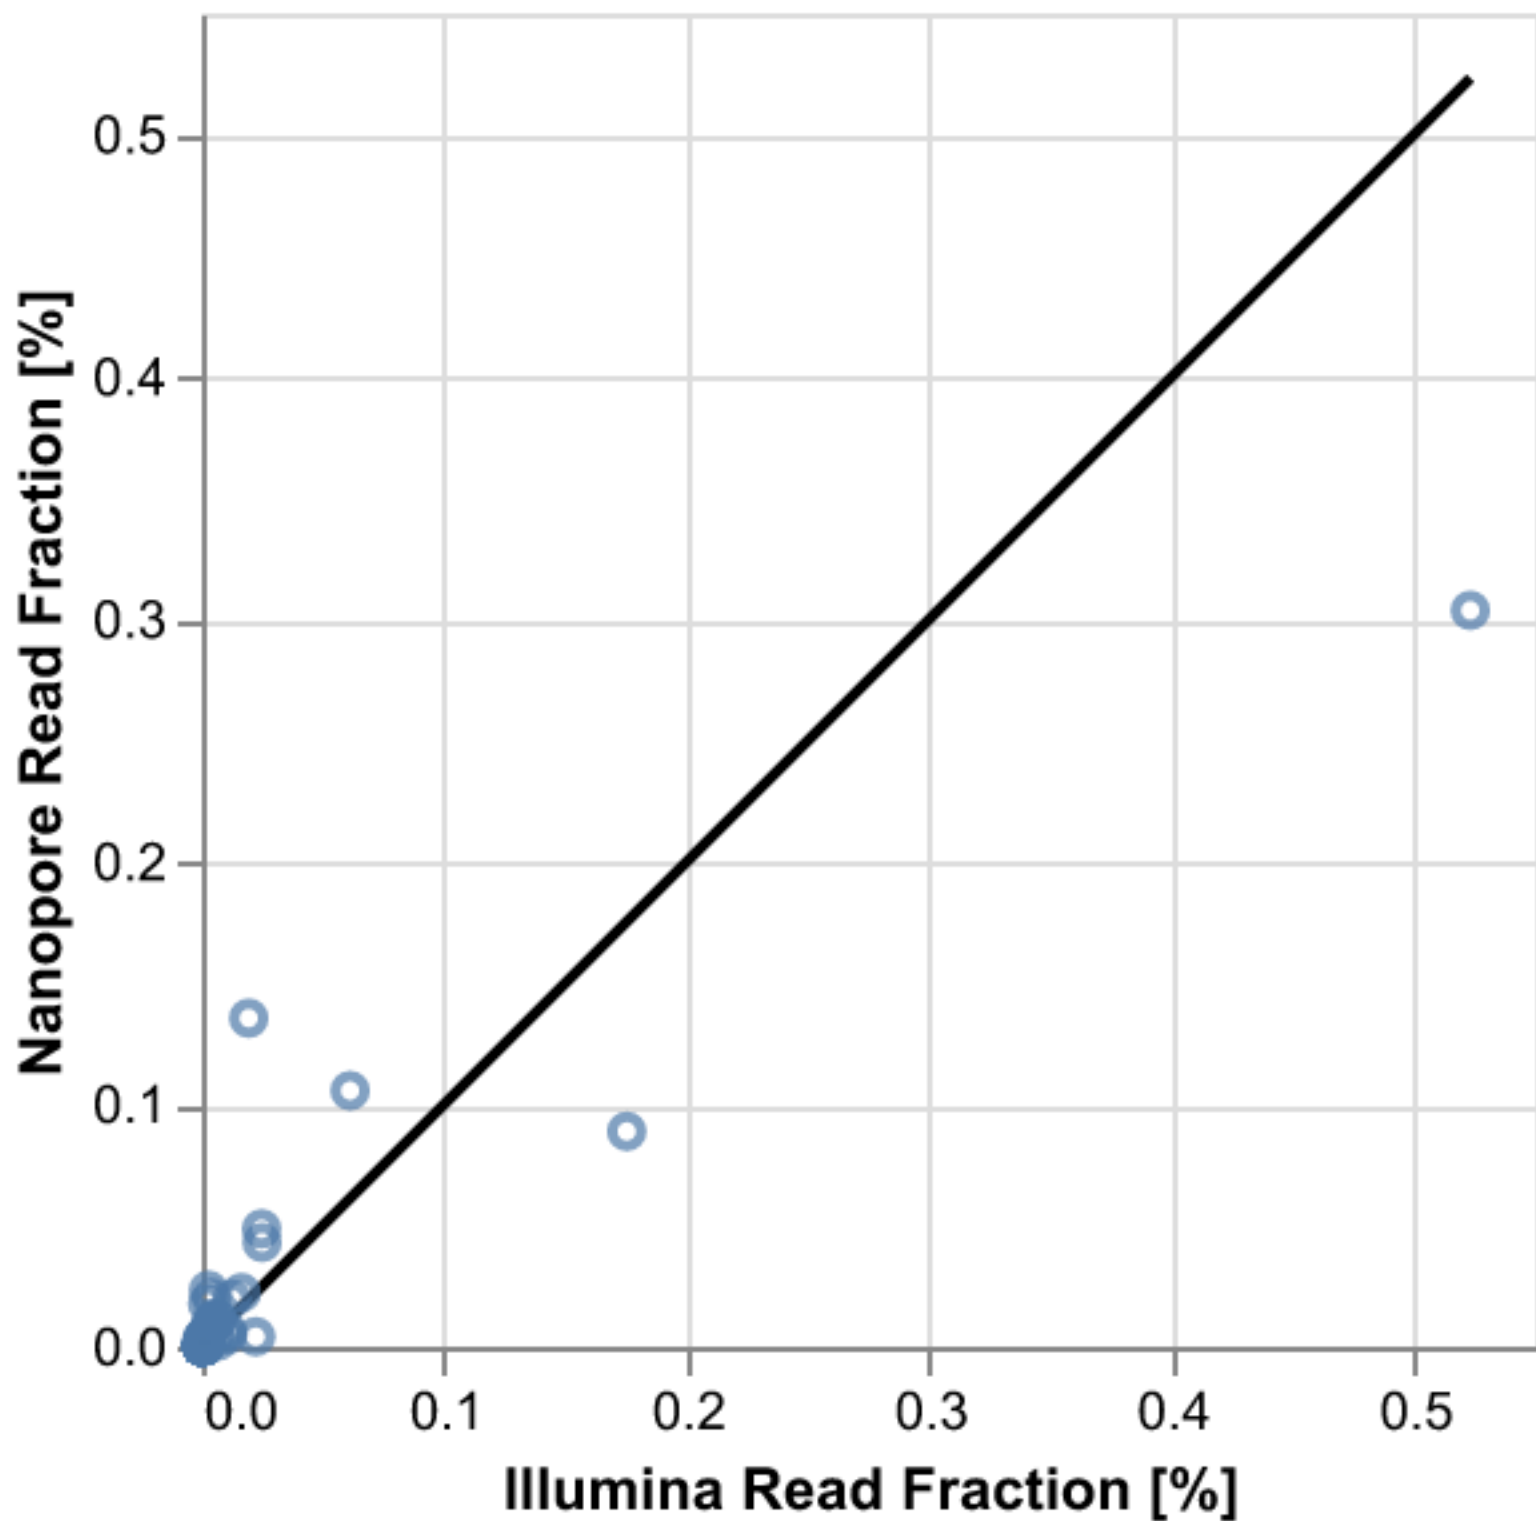

34\_41

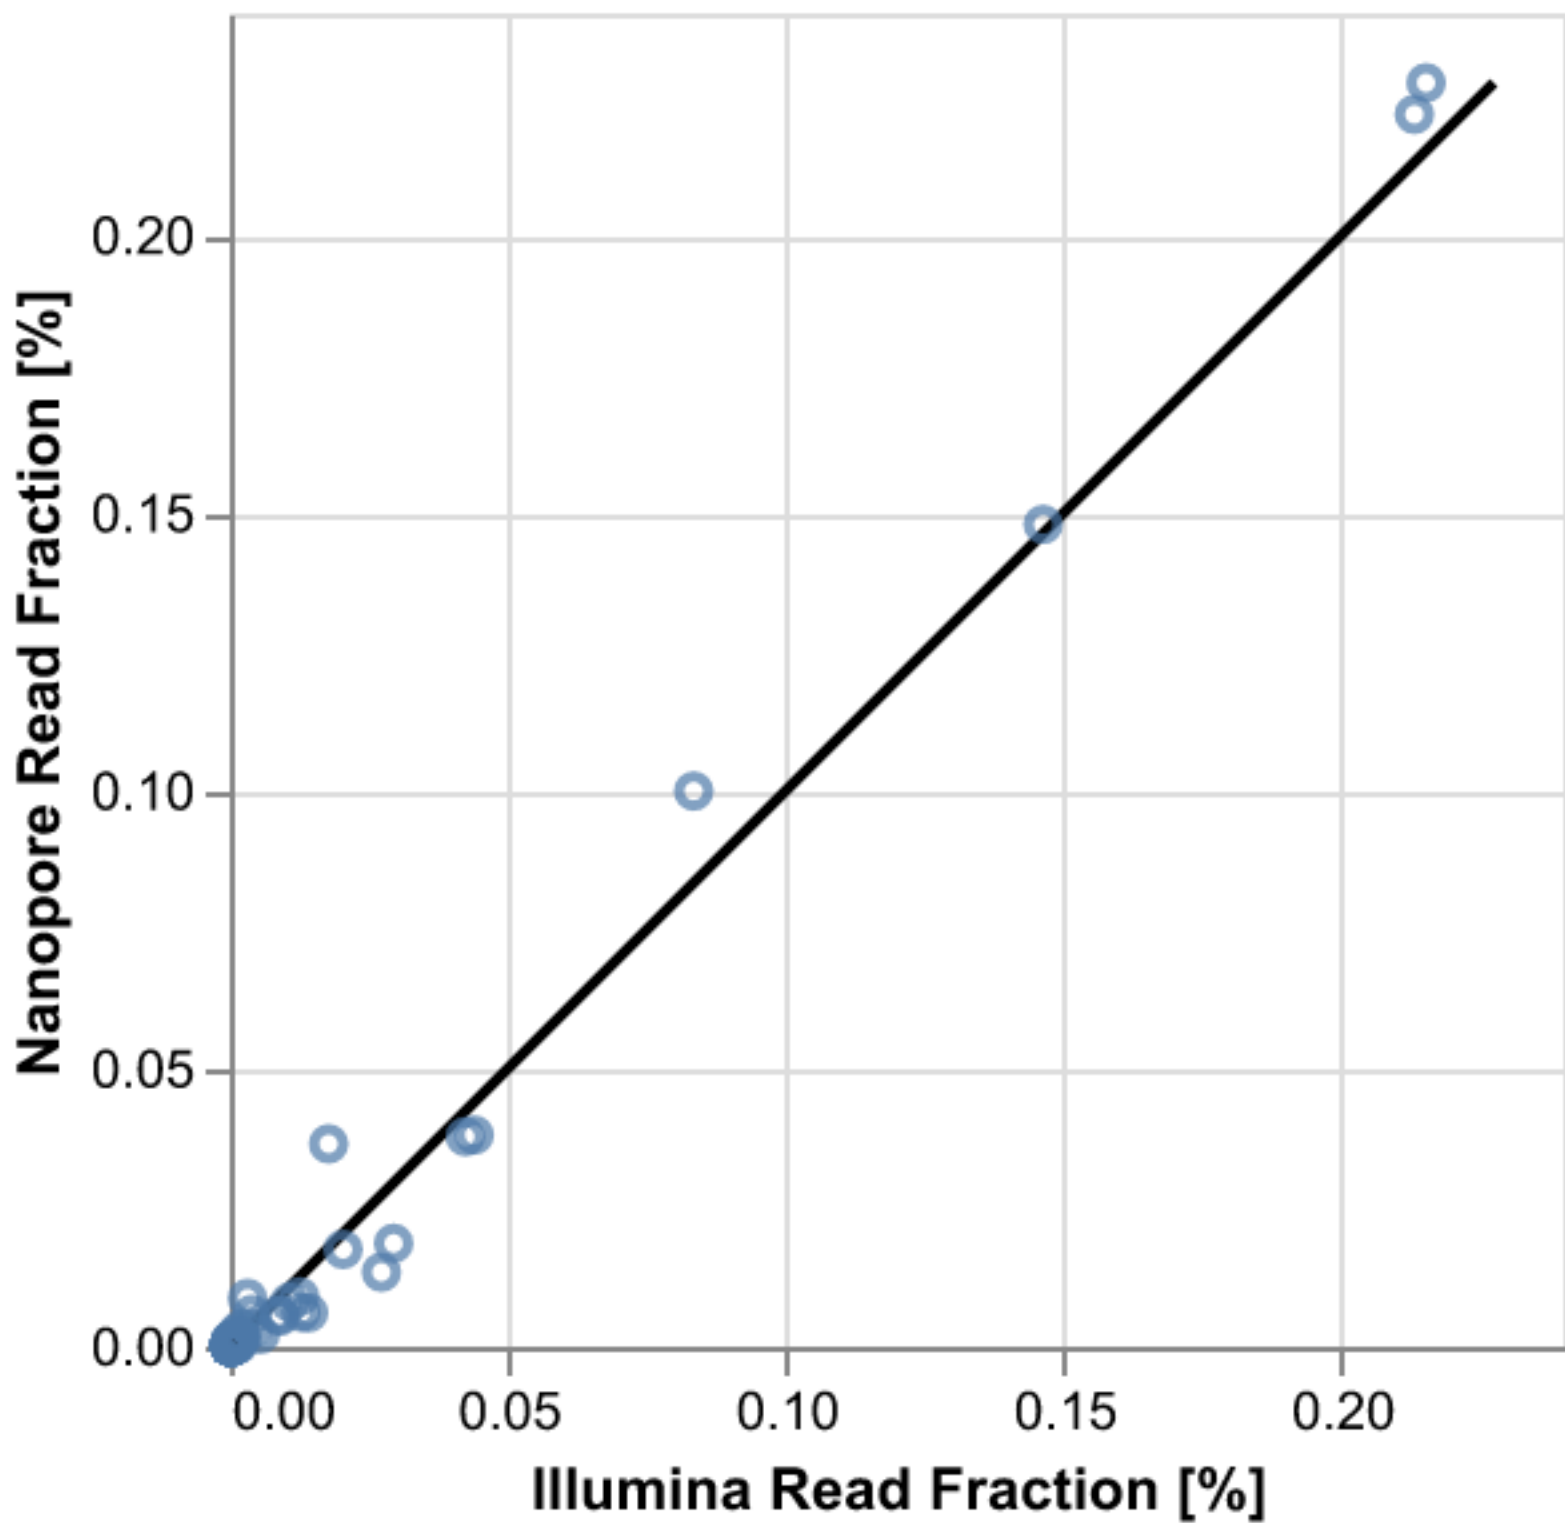

34\_-6

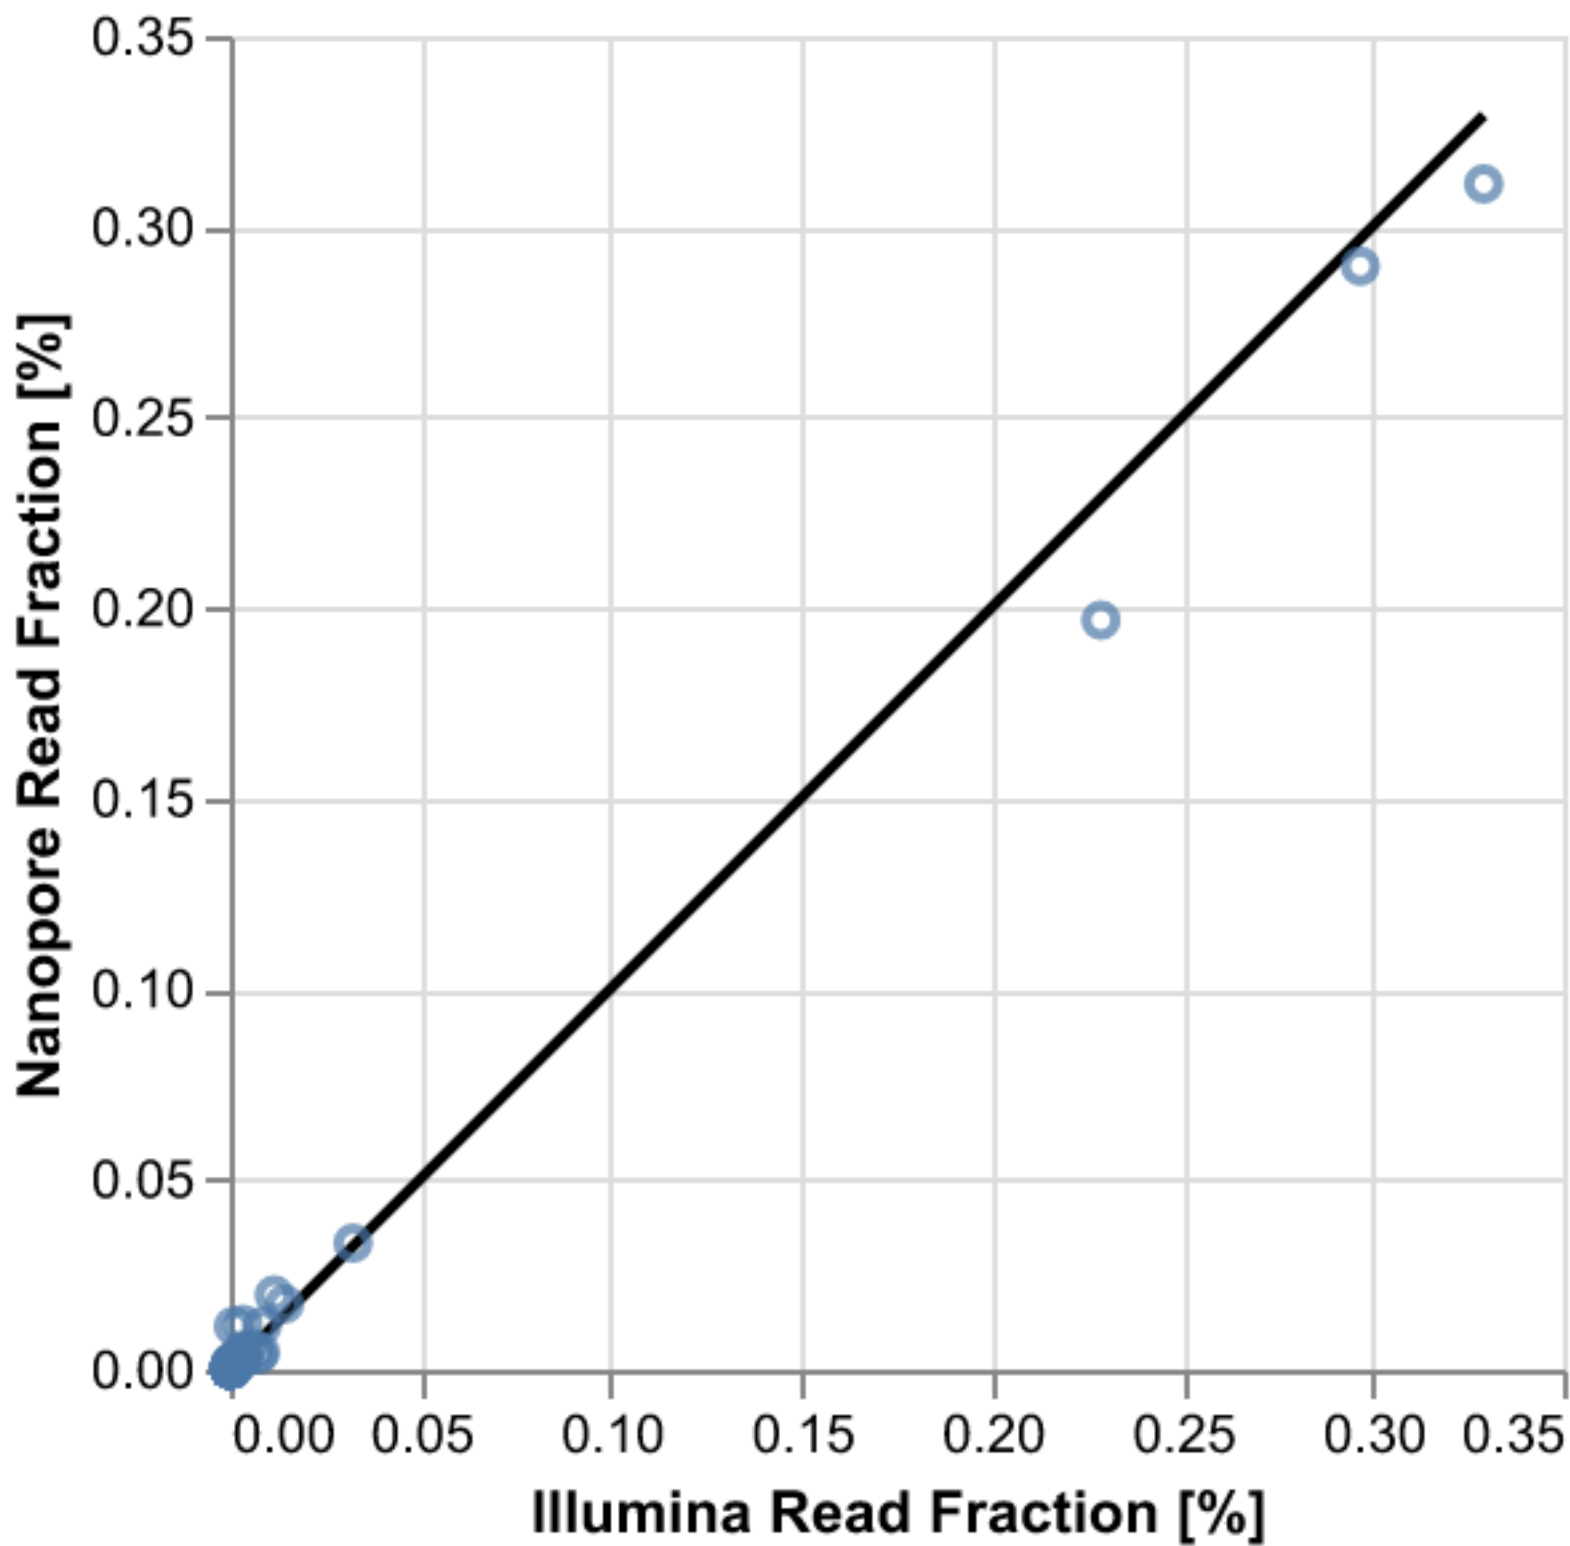

36\_-4

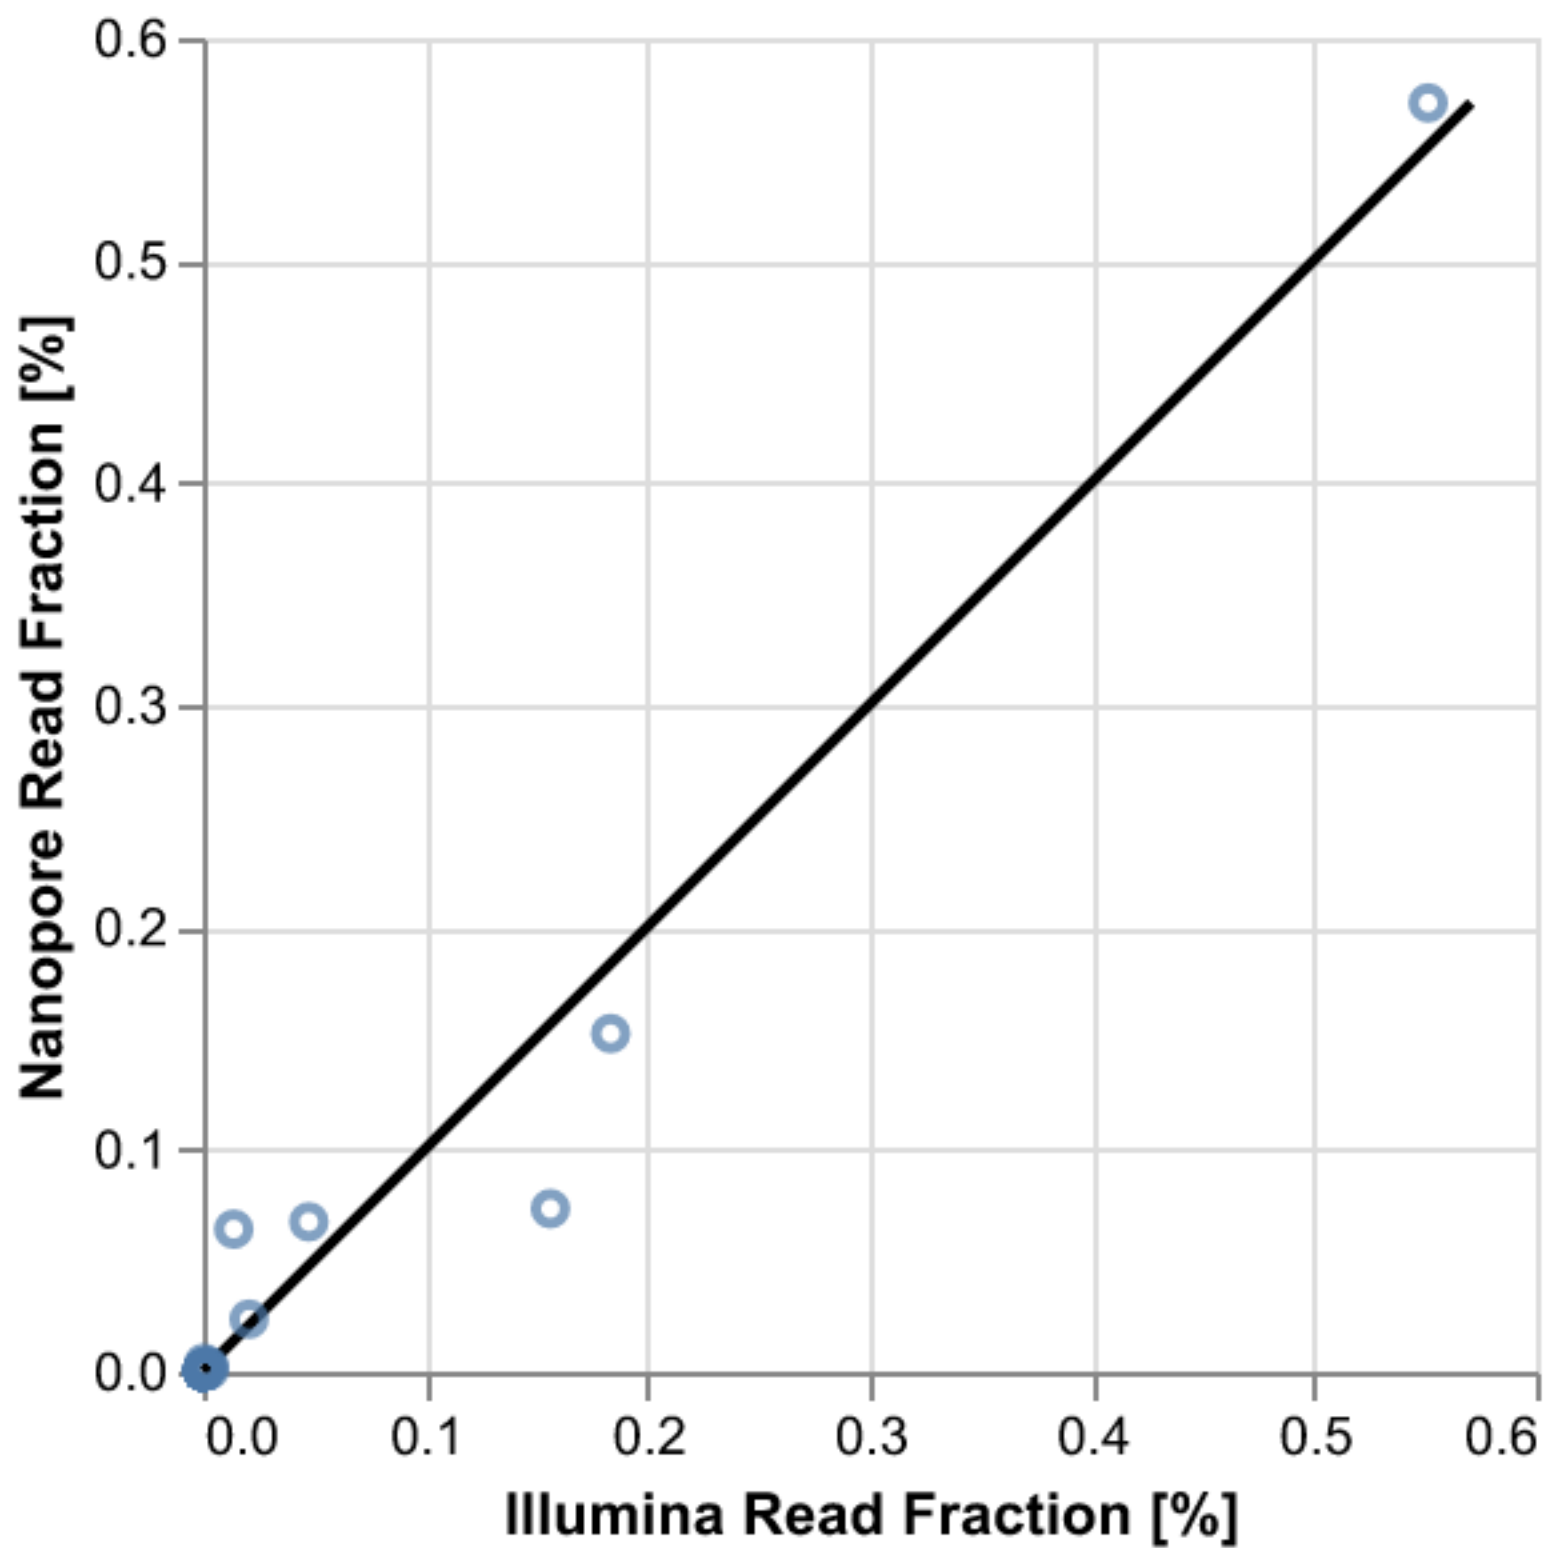



36\_63

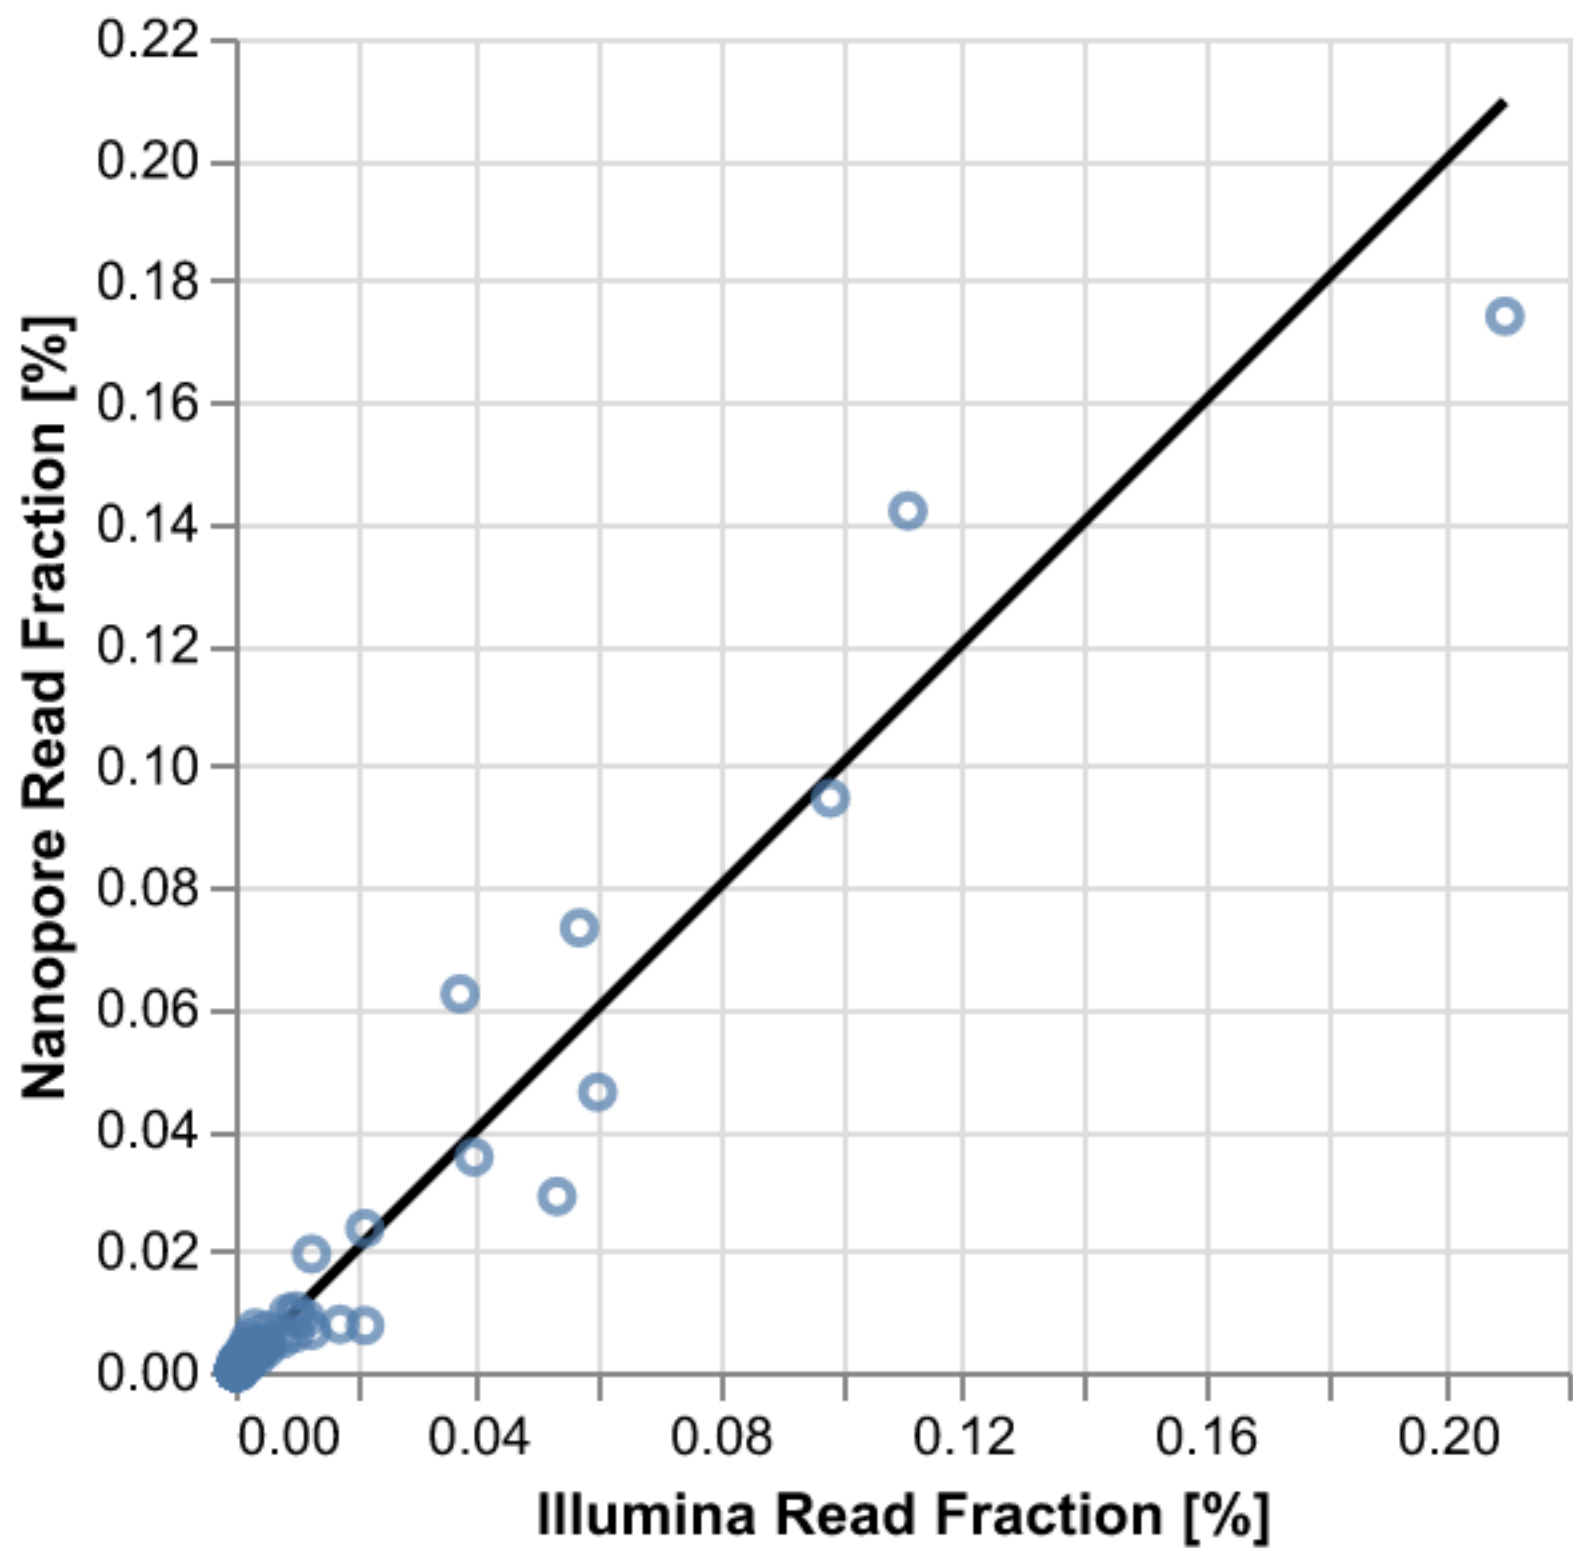

36\_-6

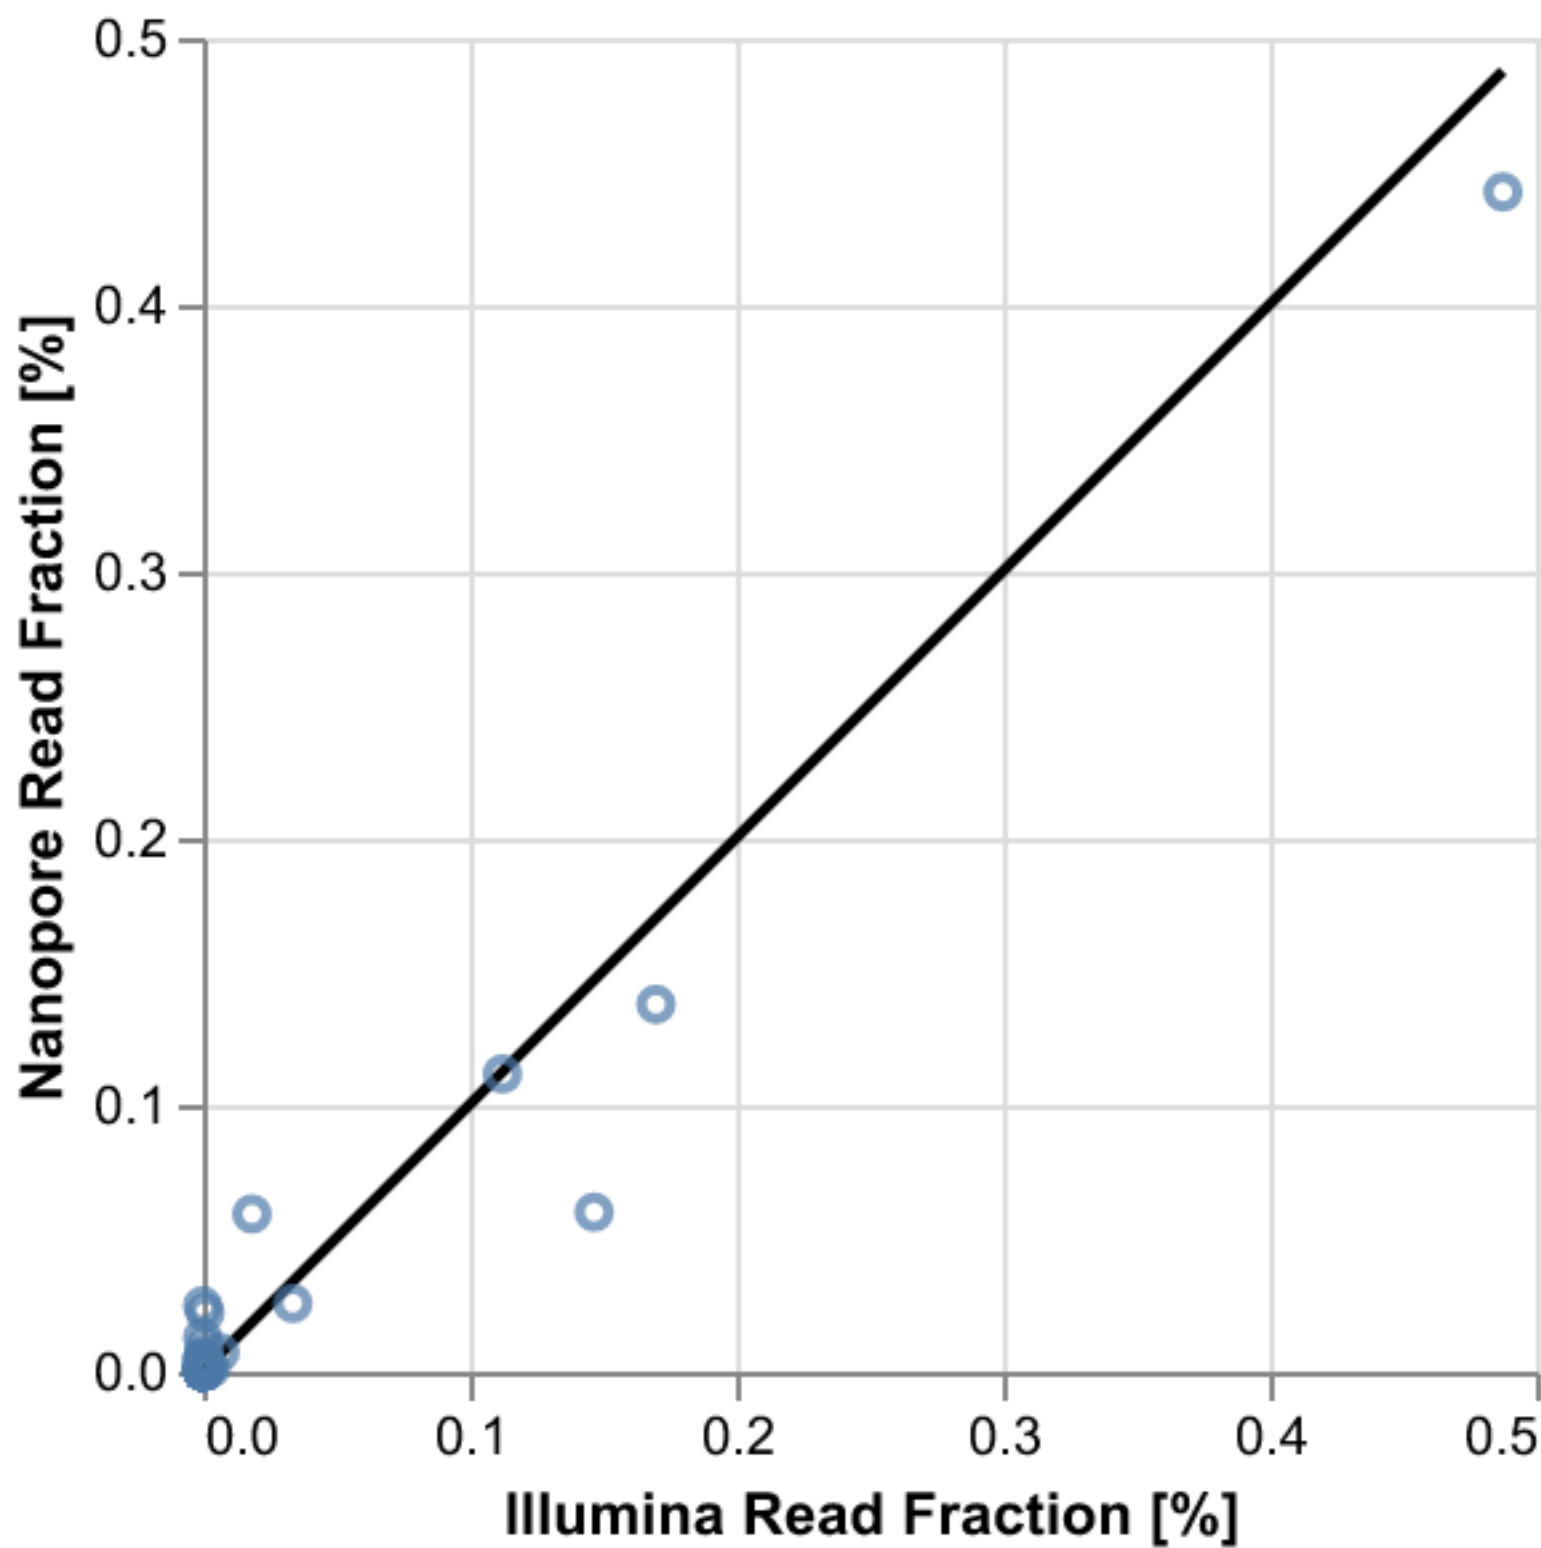

37\_138

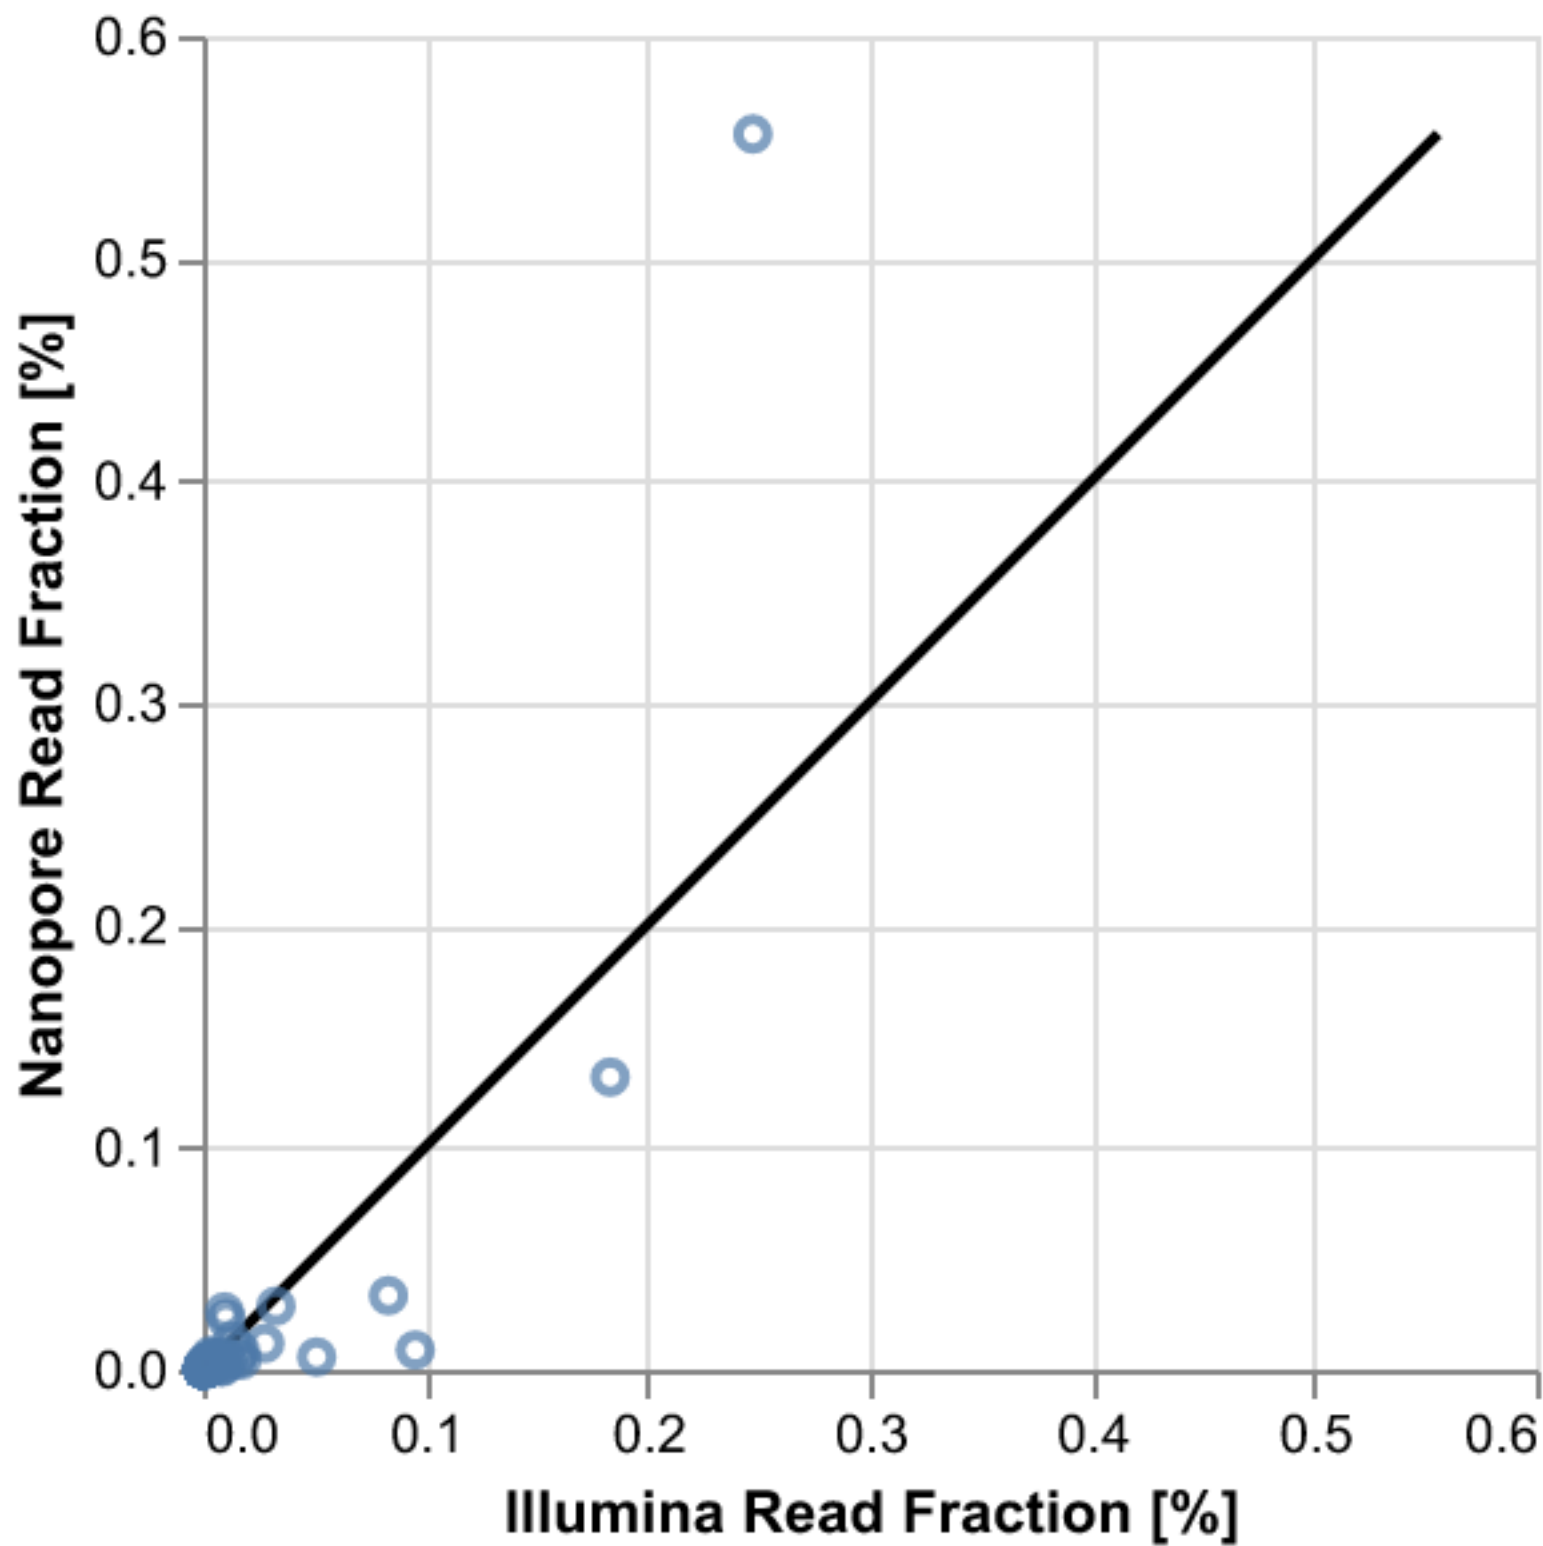

37\_1

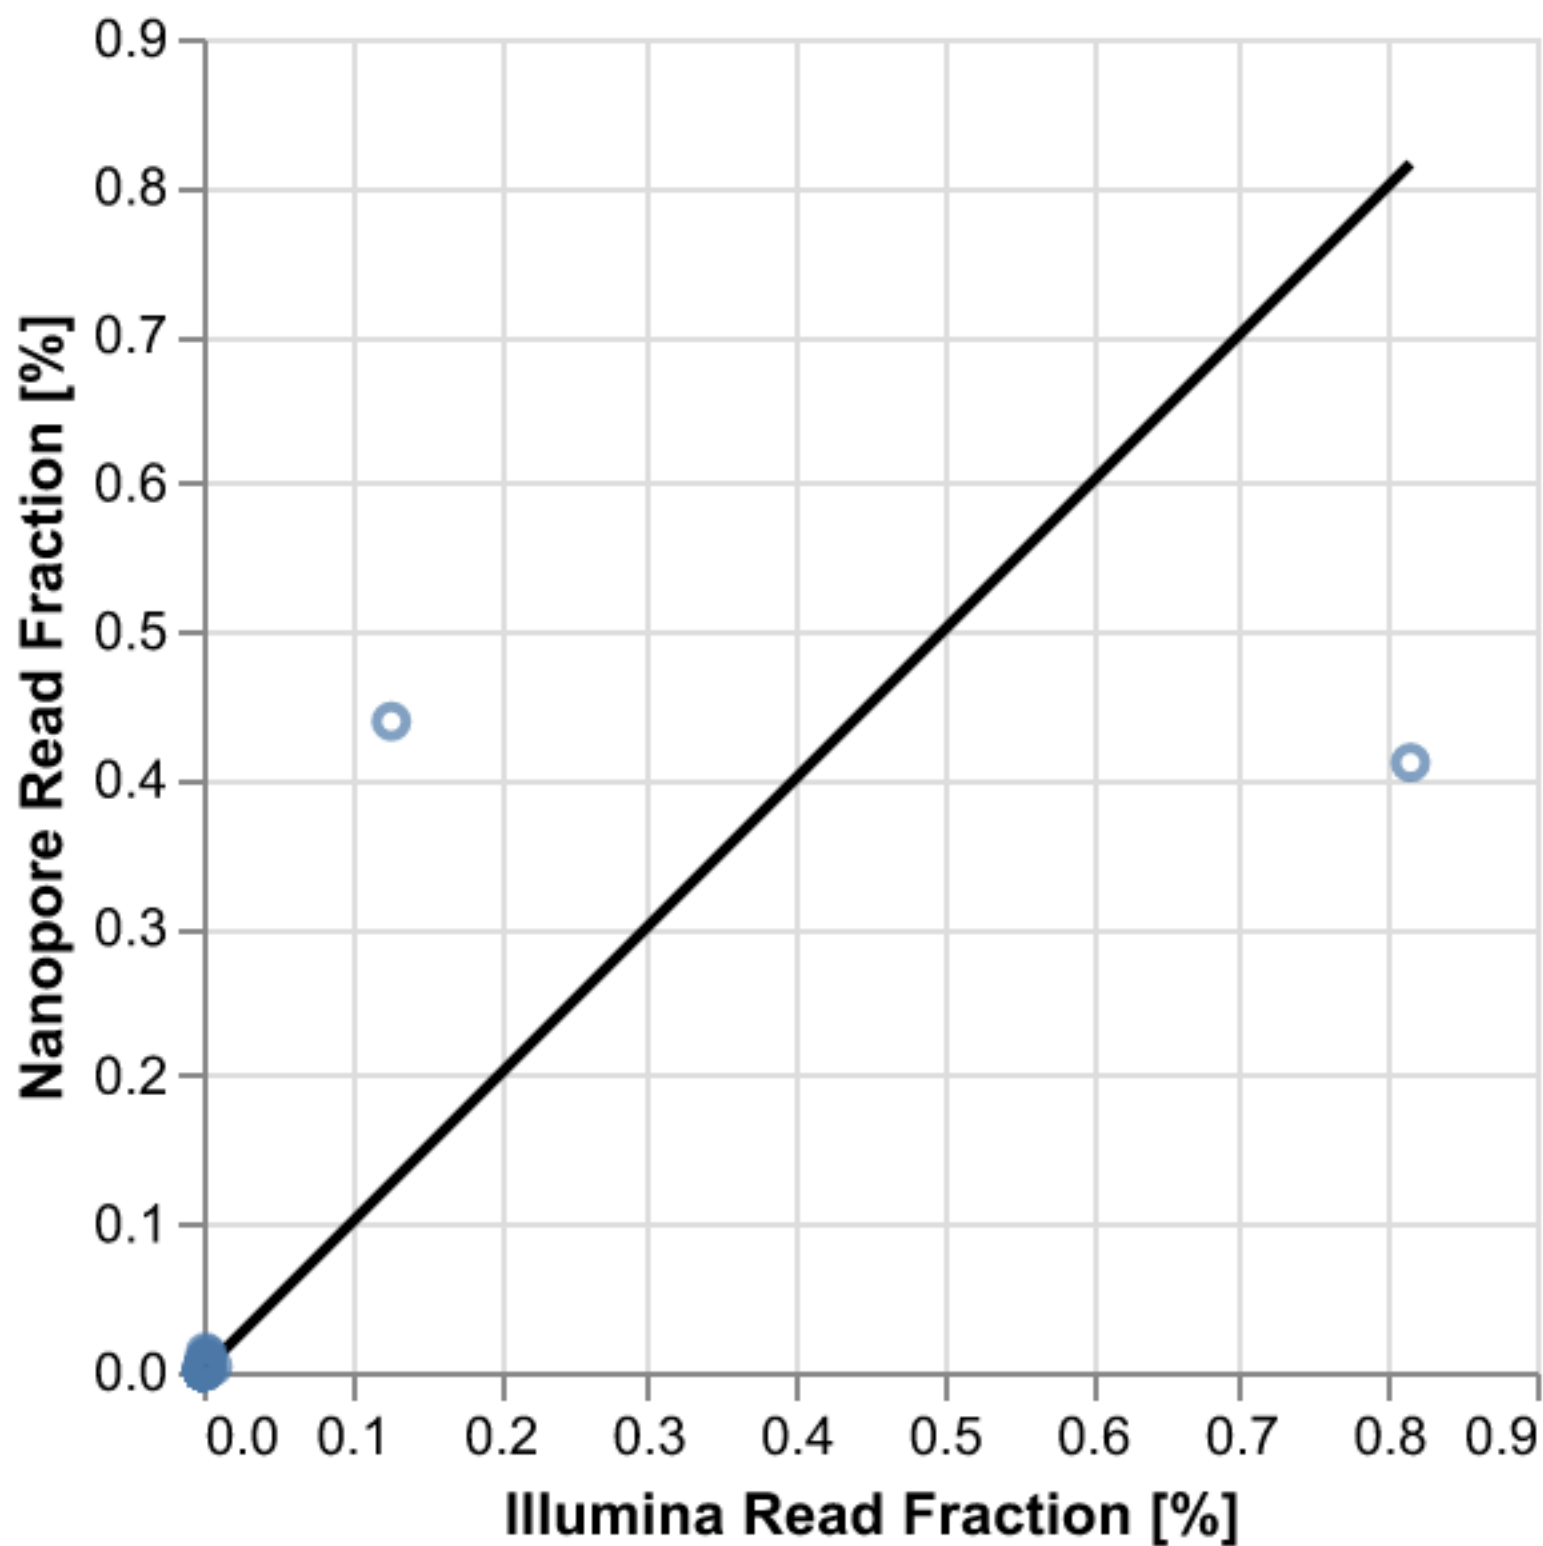

39\_115

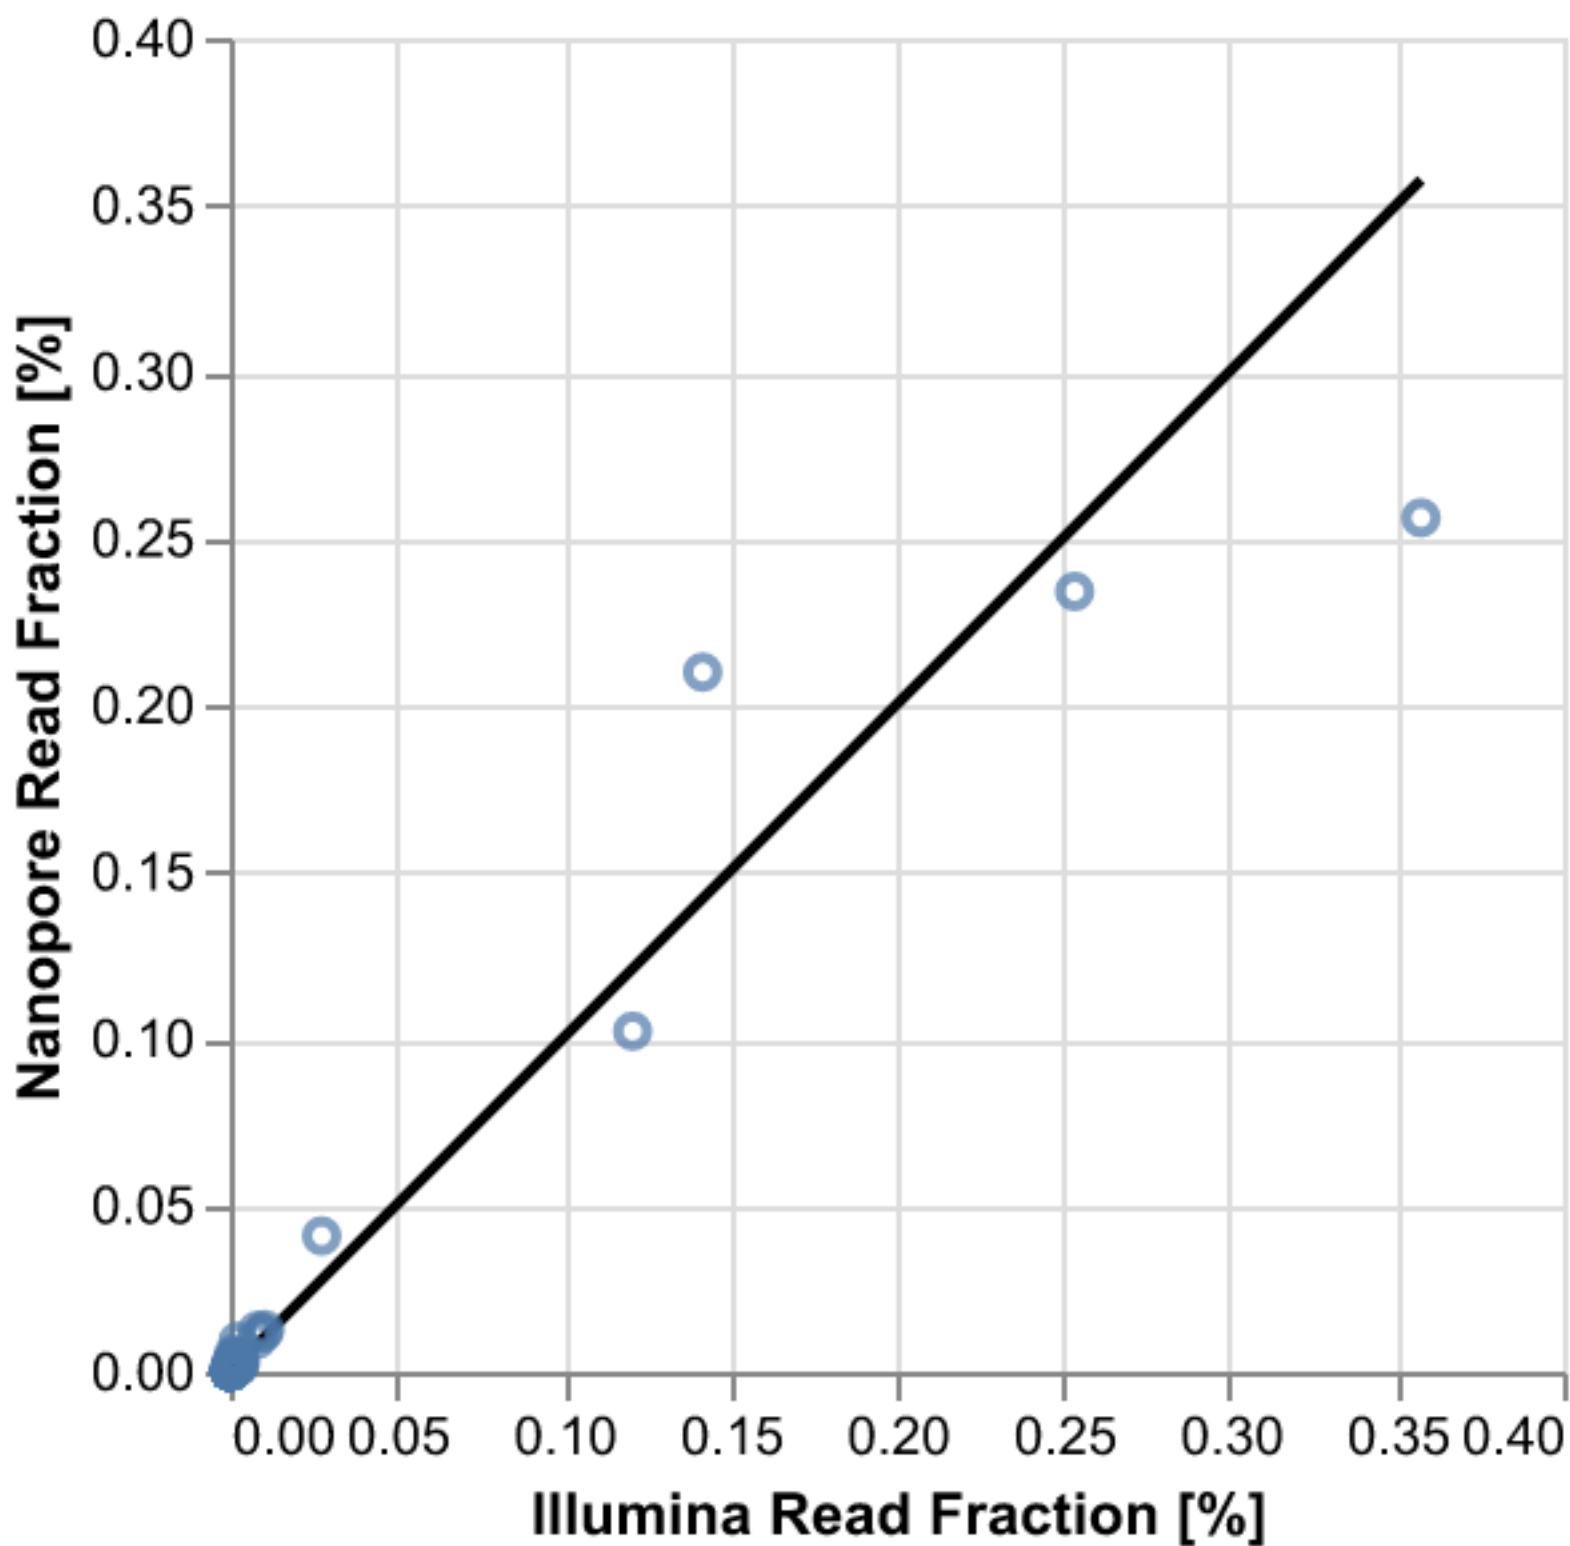

39\_15

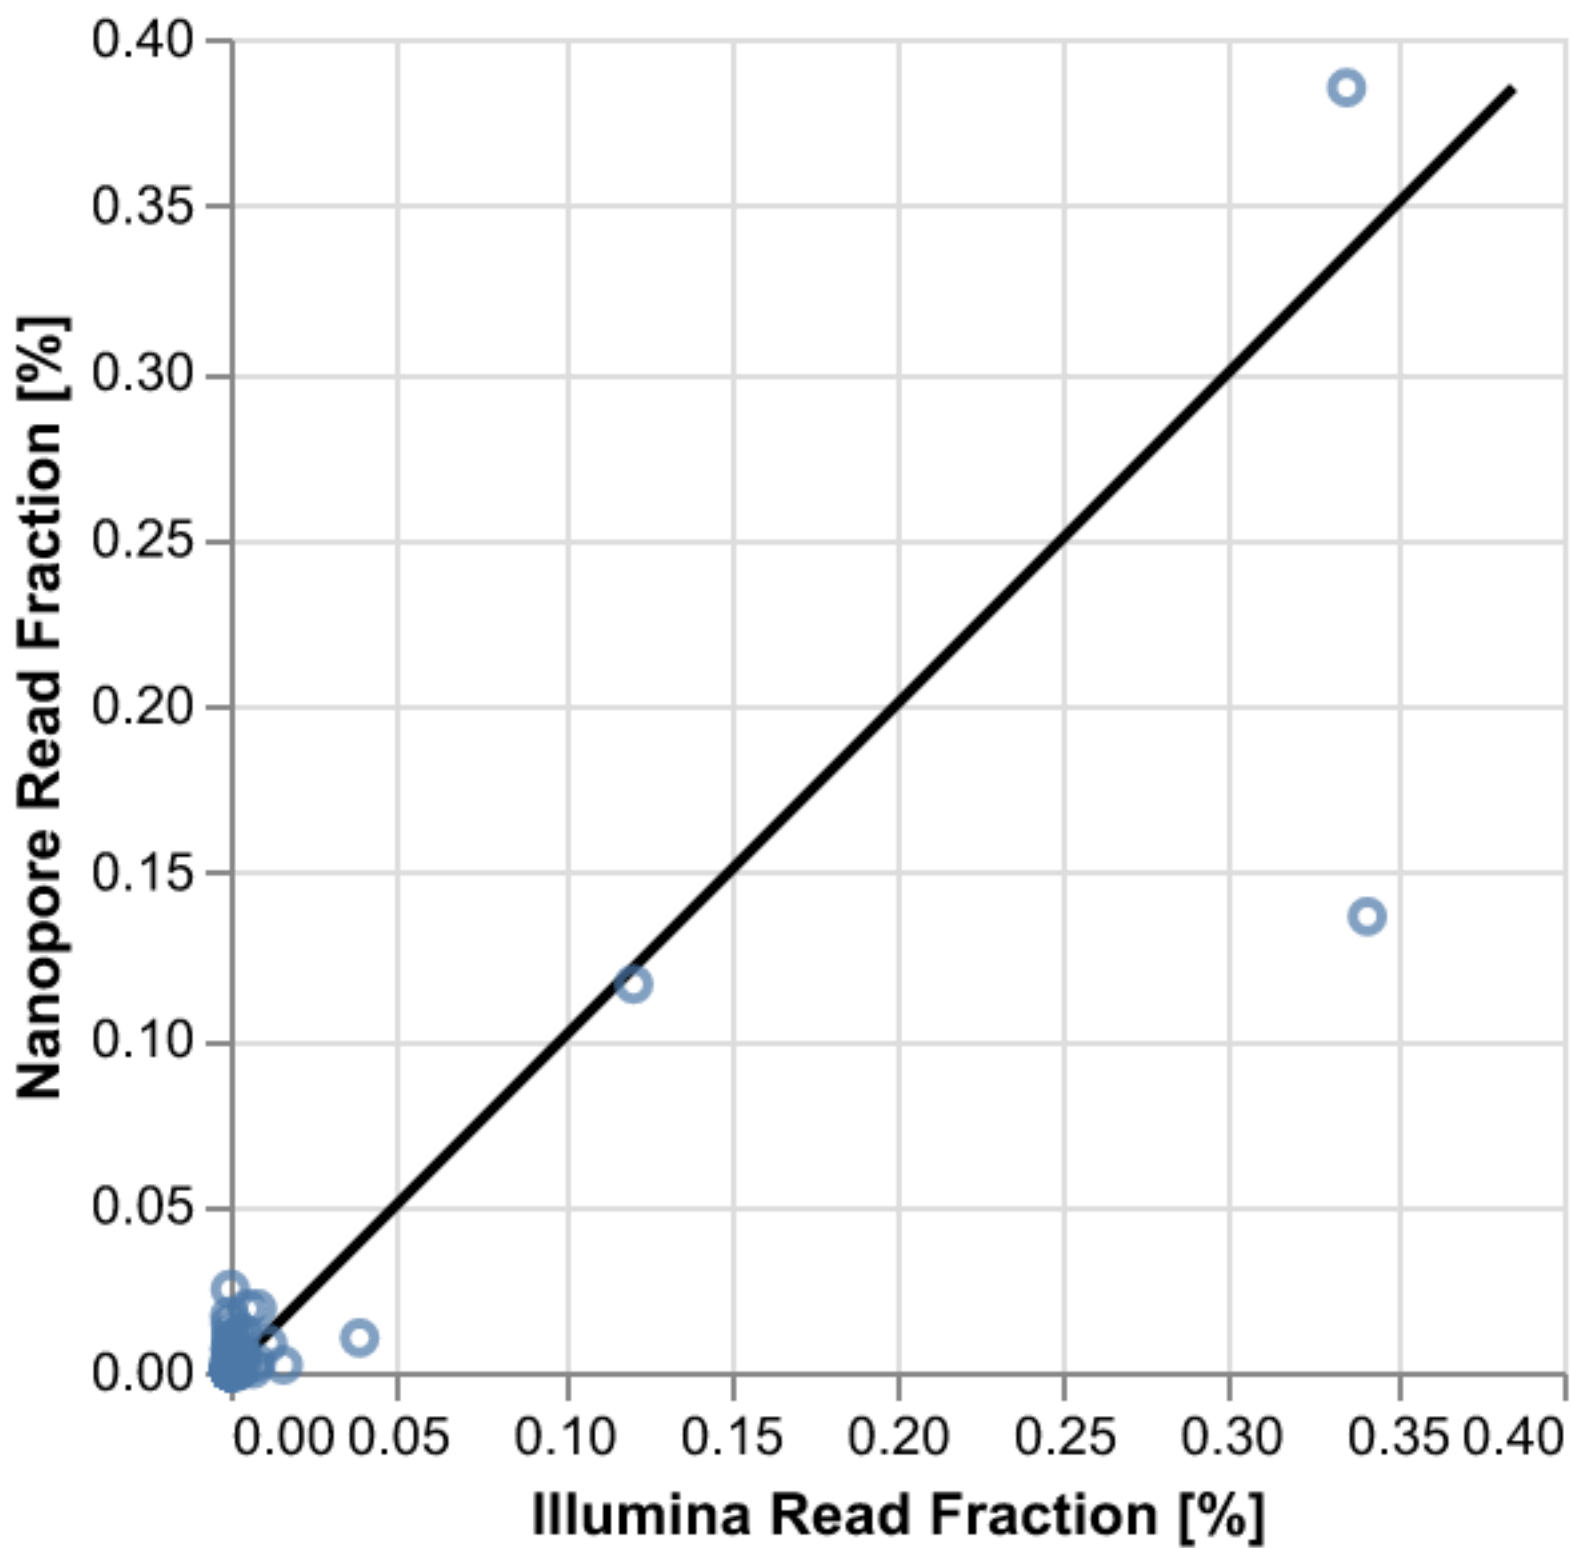

39\_-6

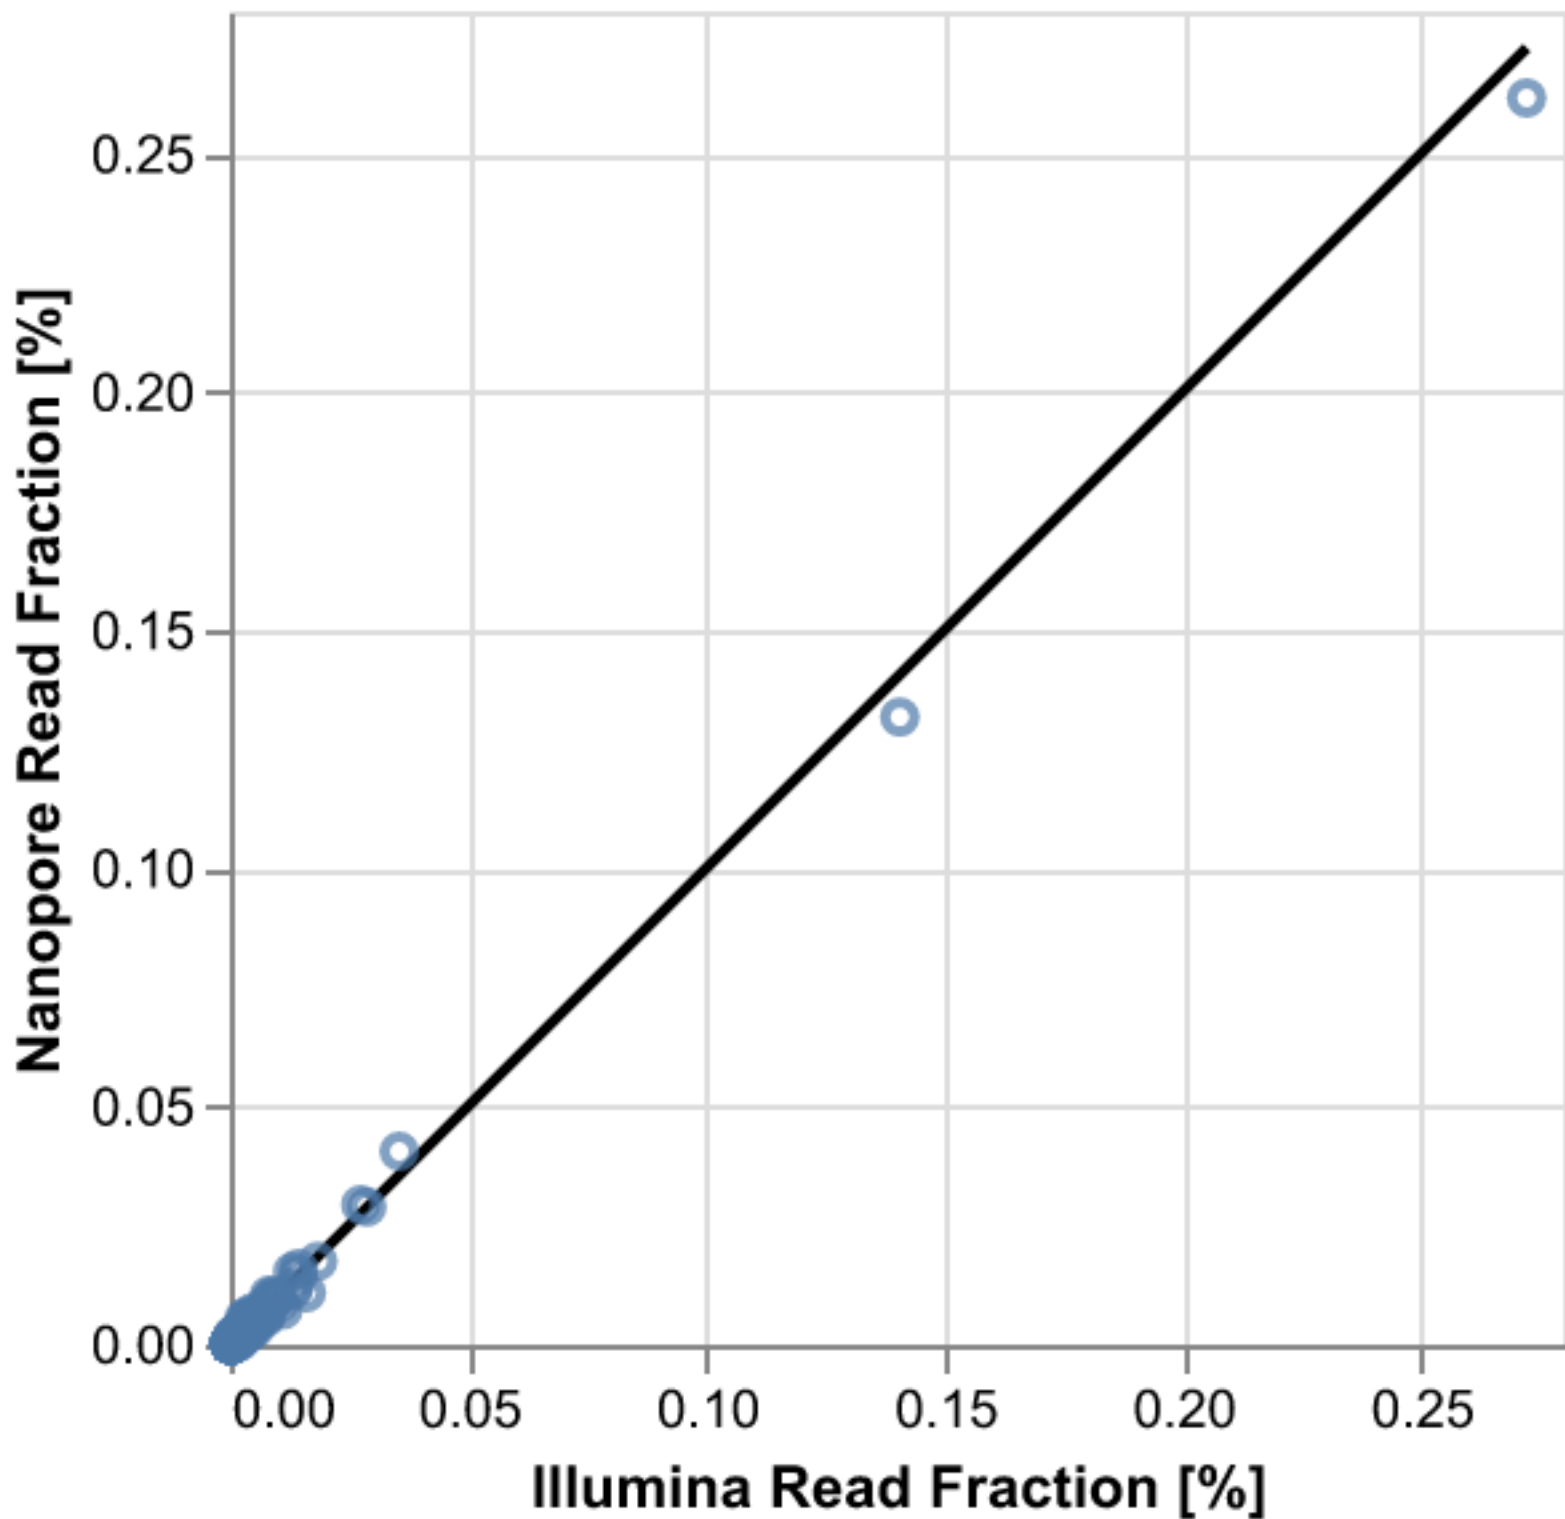

42\_18

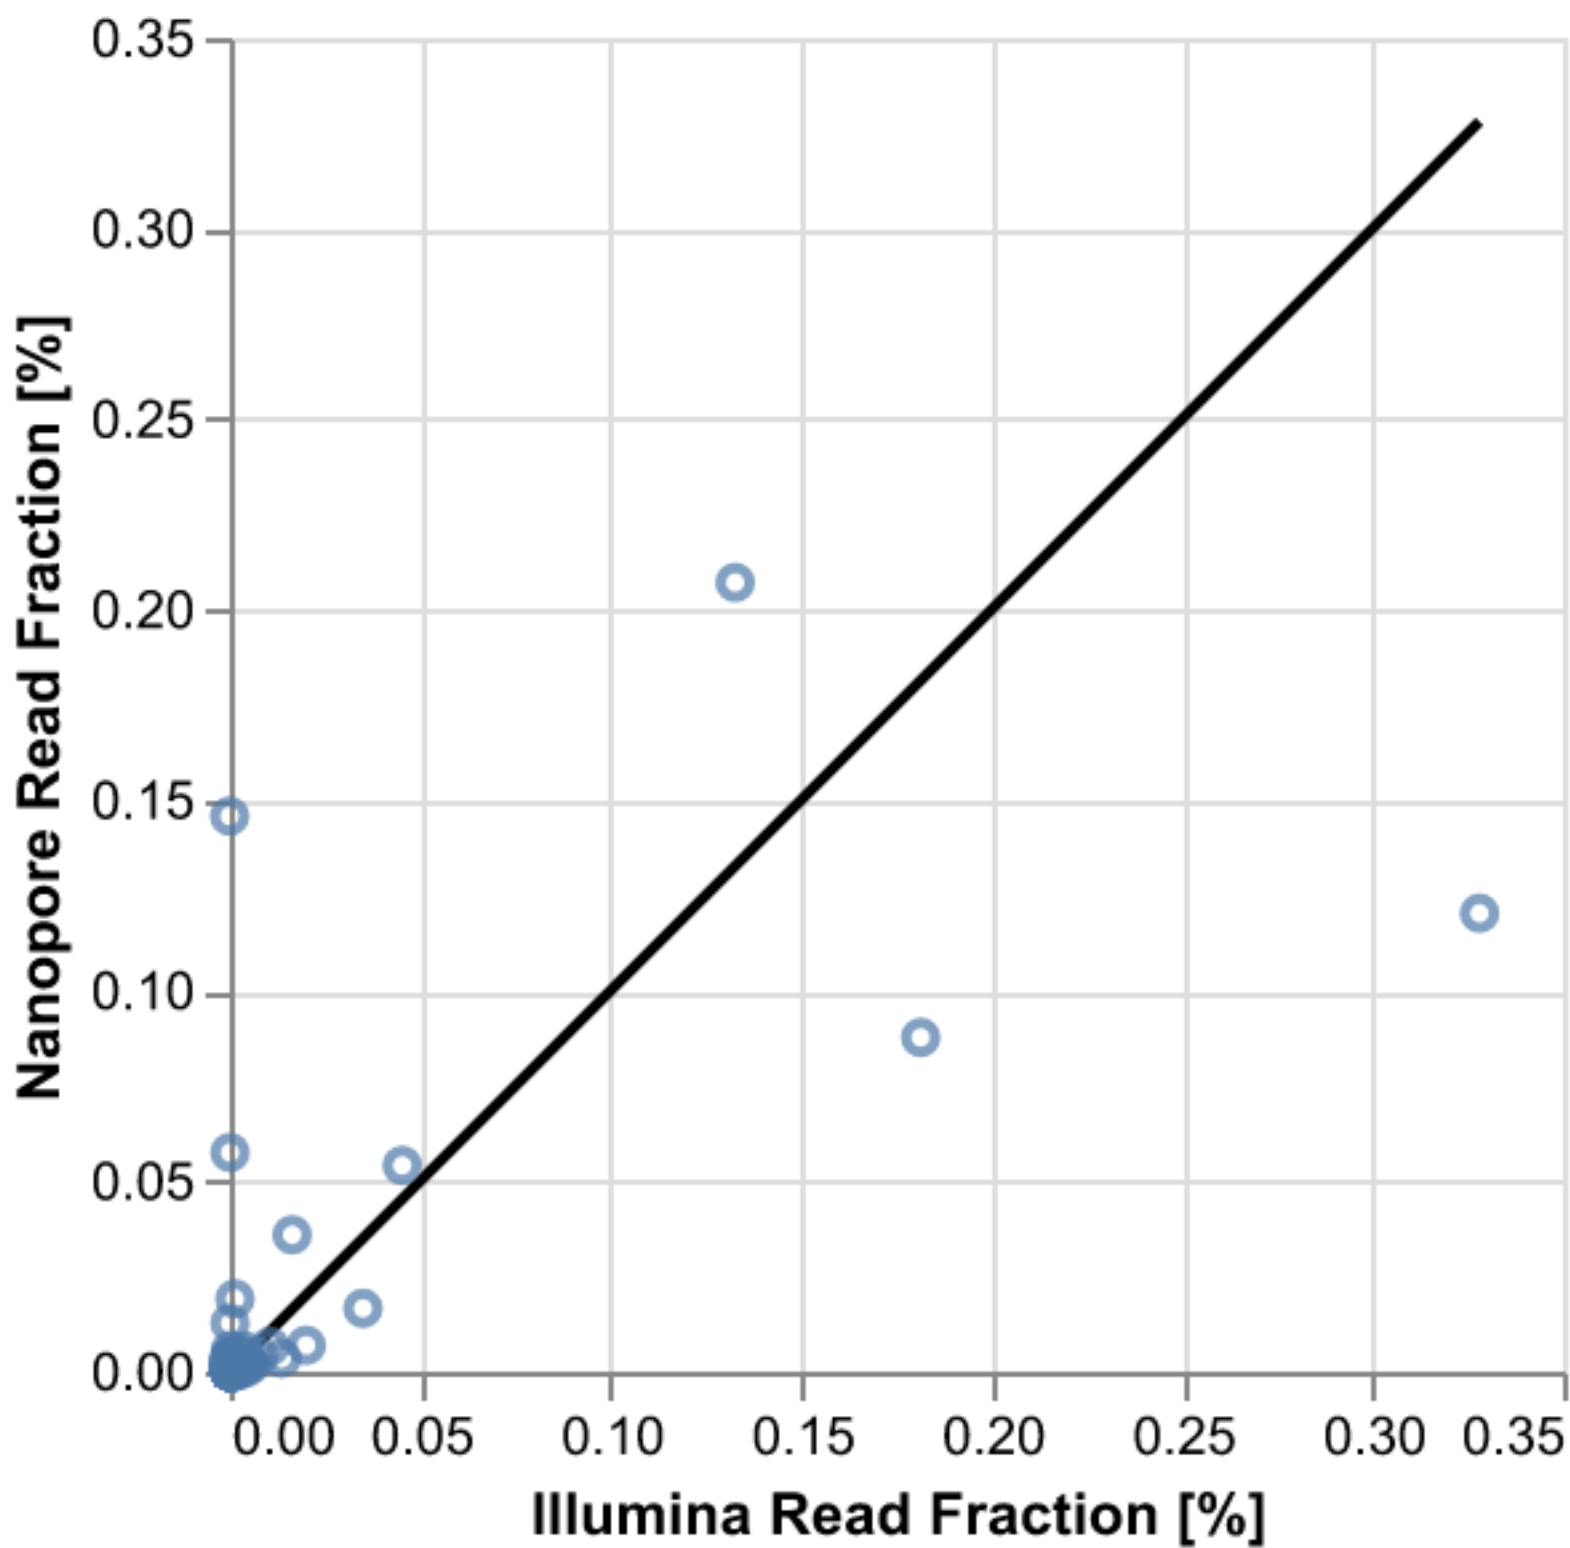



42\_30

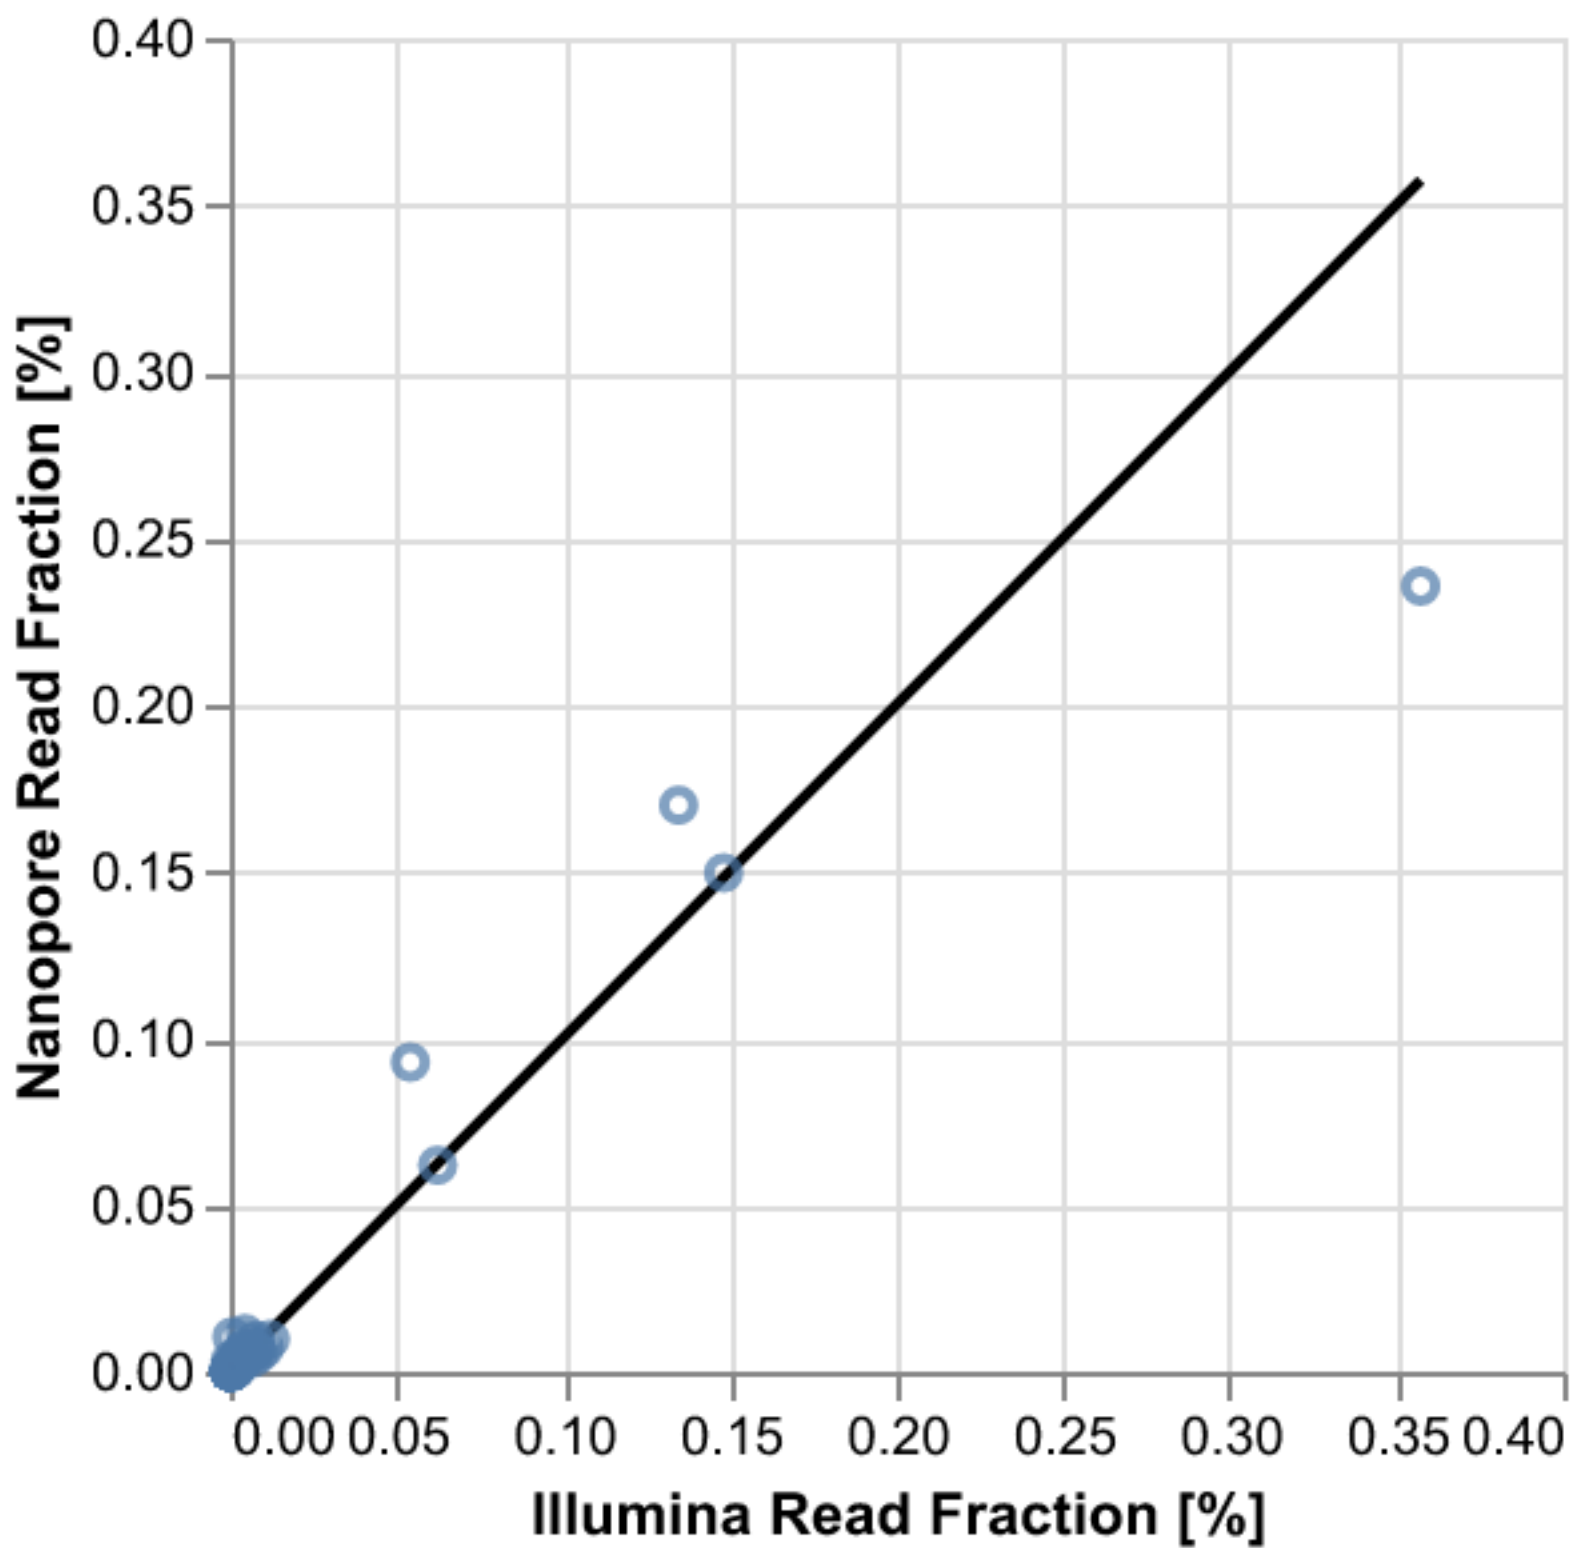

42\_6

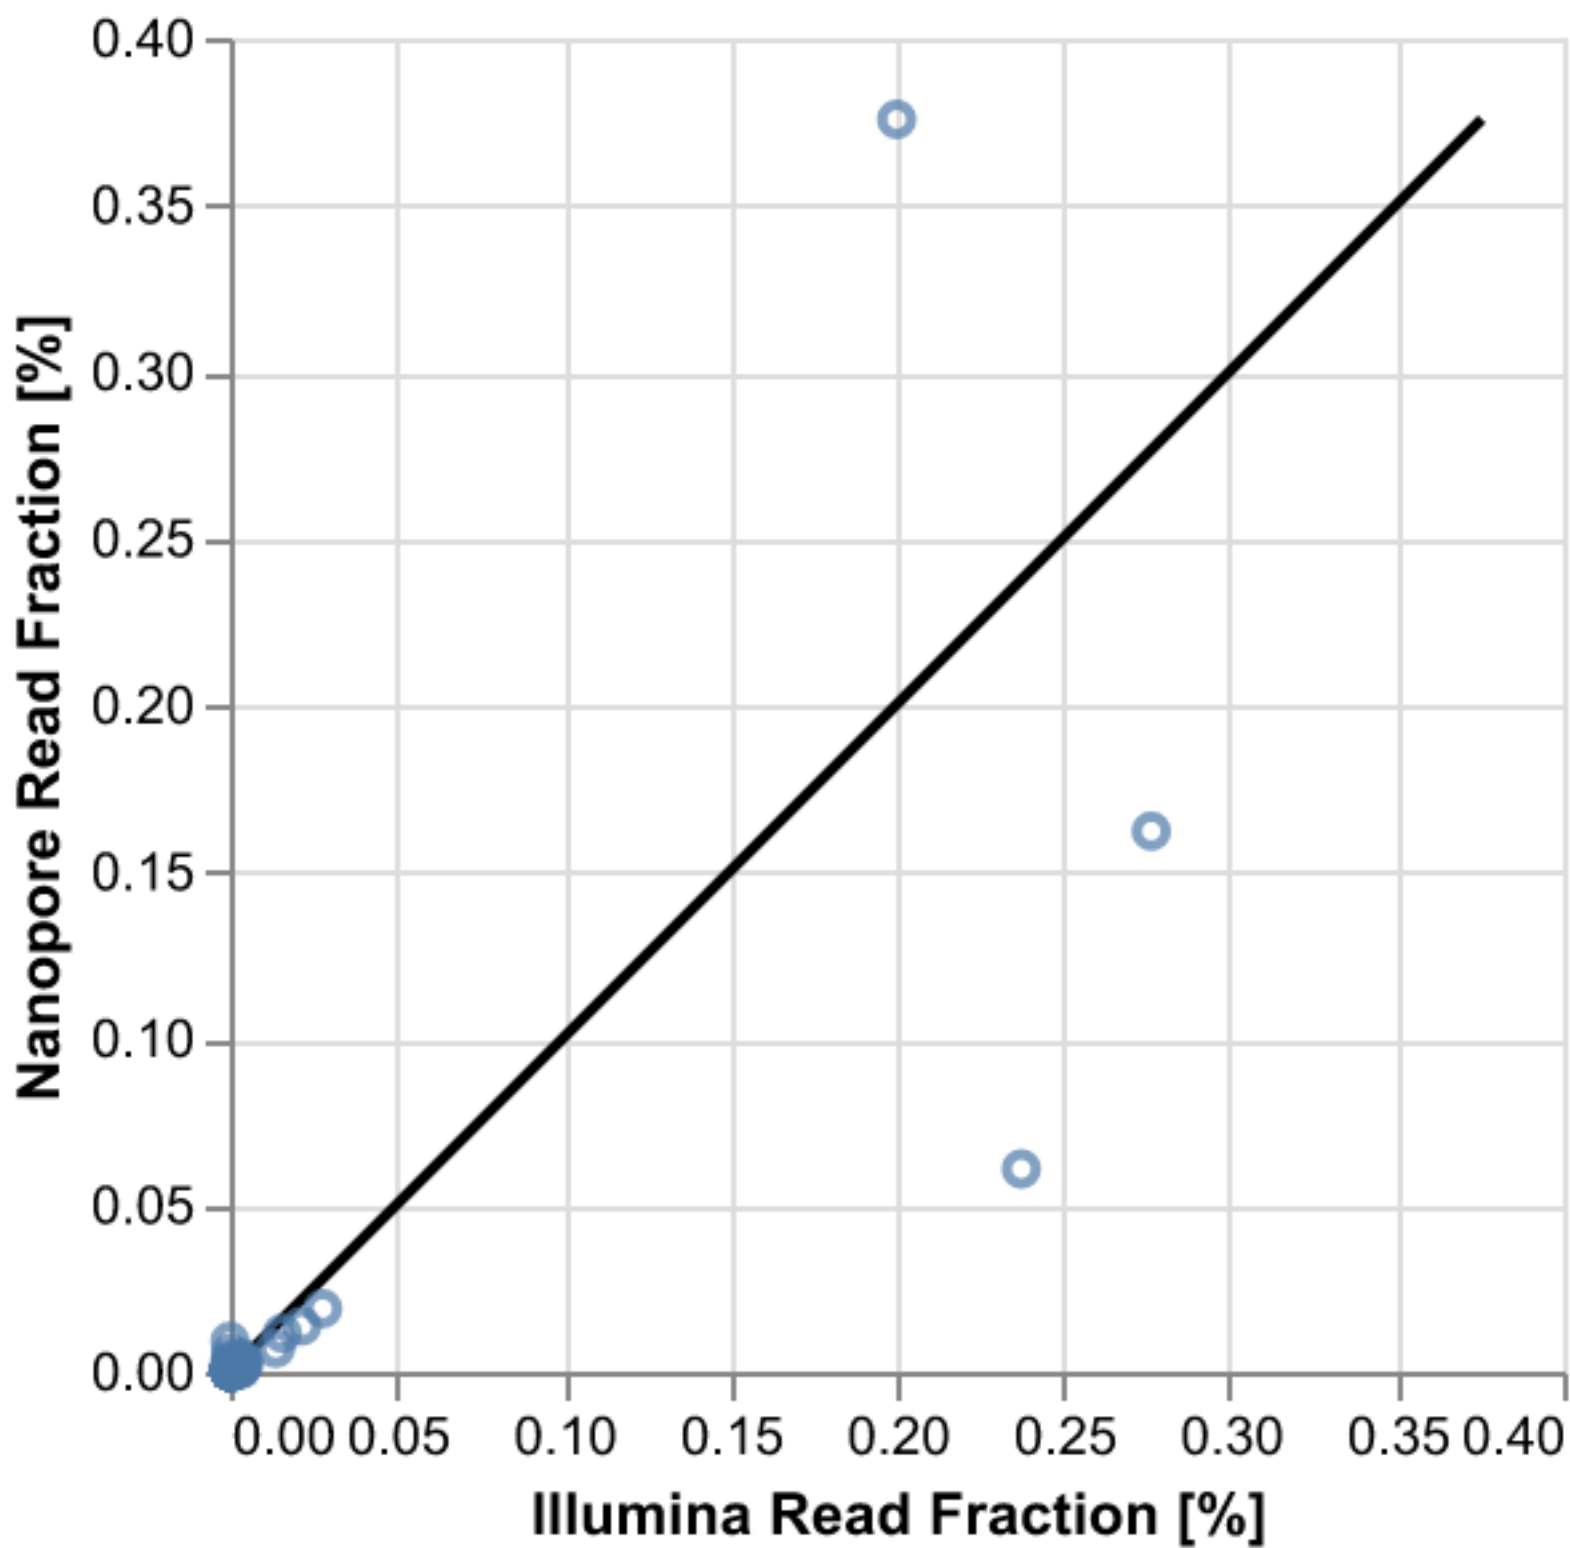



4\_-7

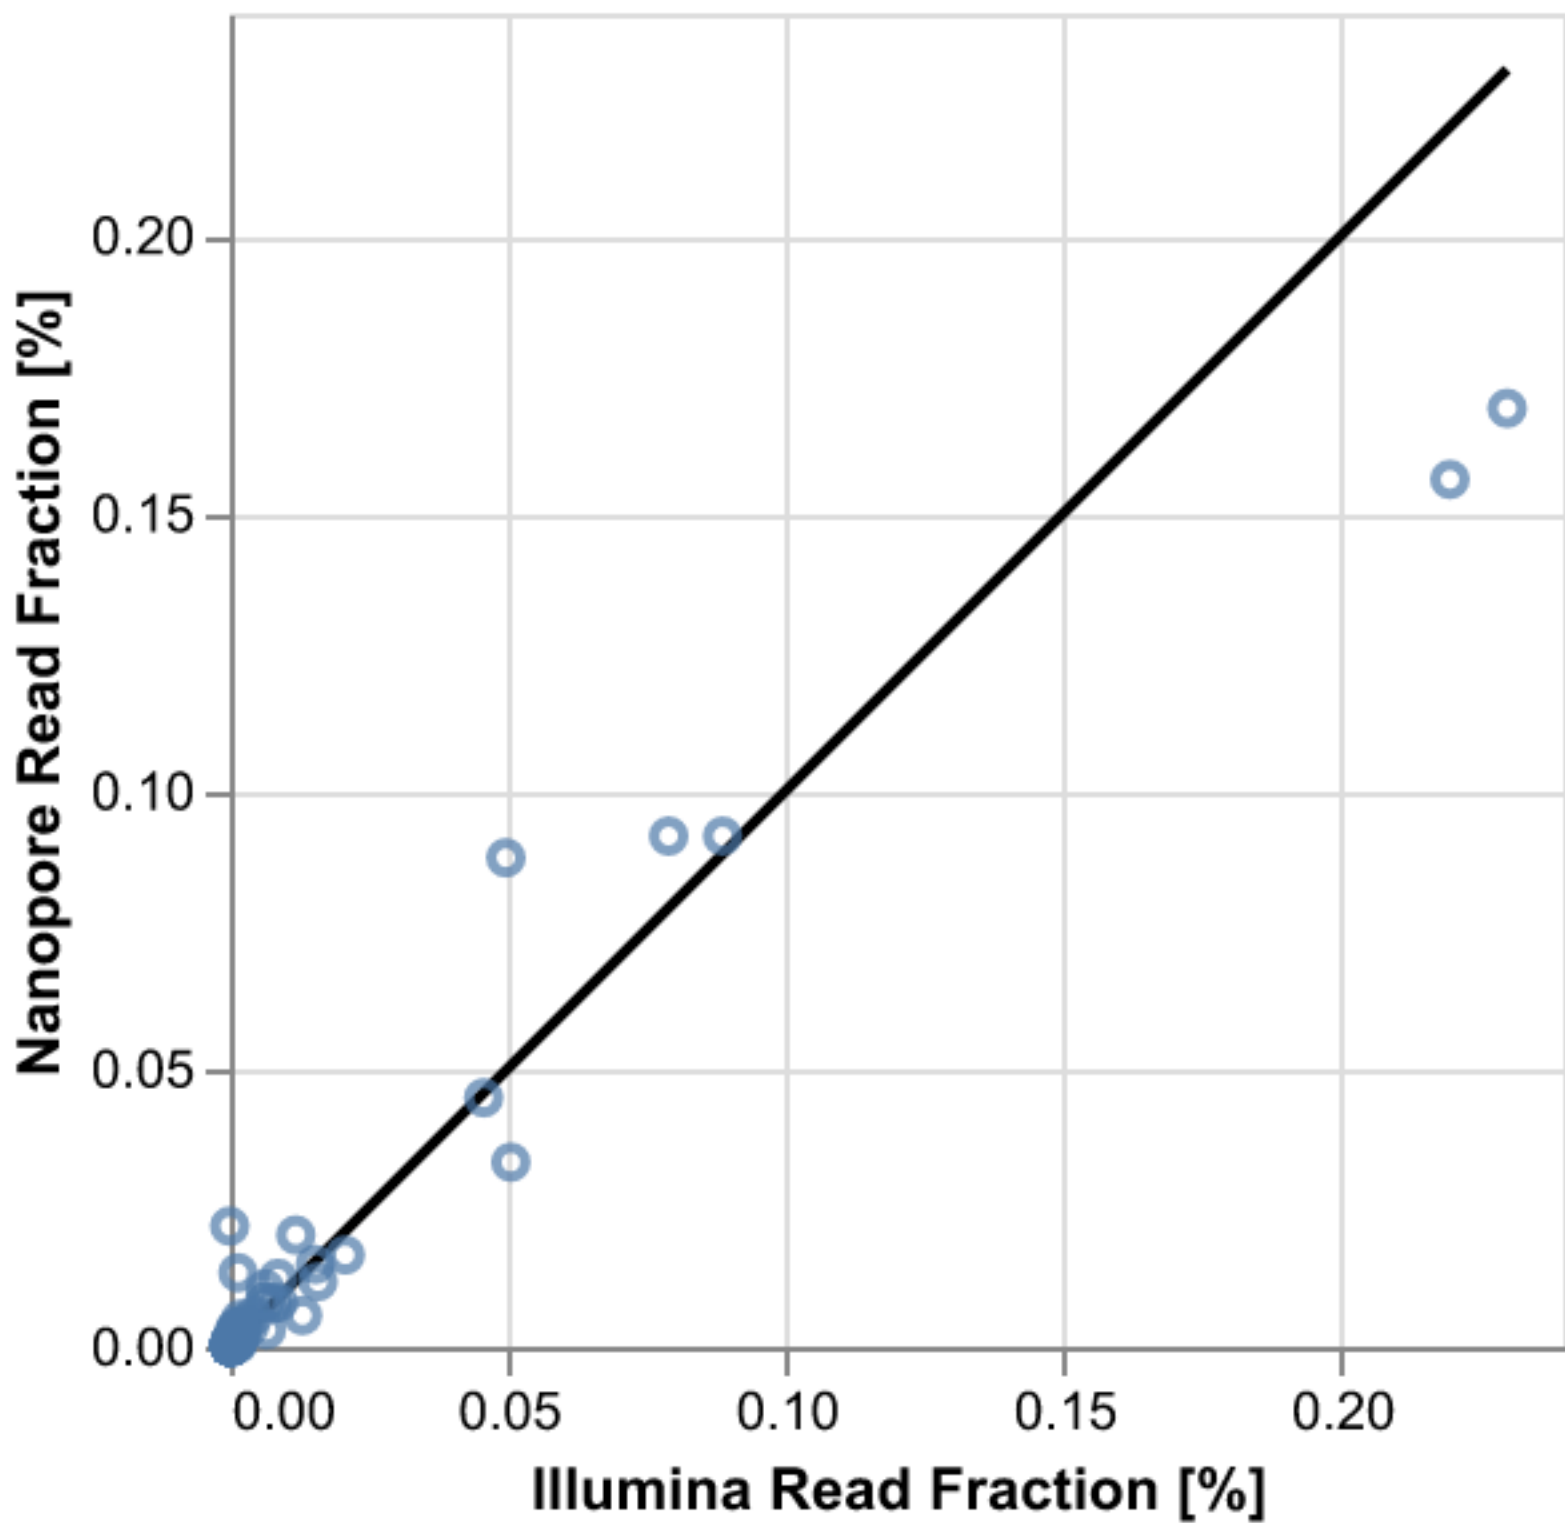

7\_-6

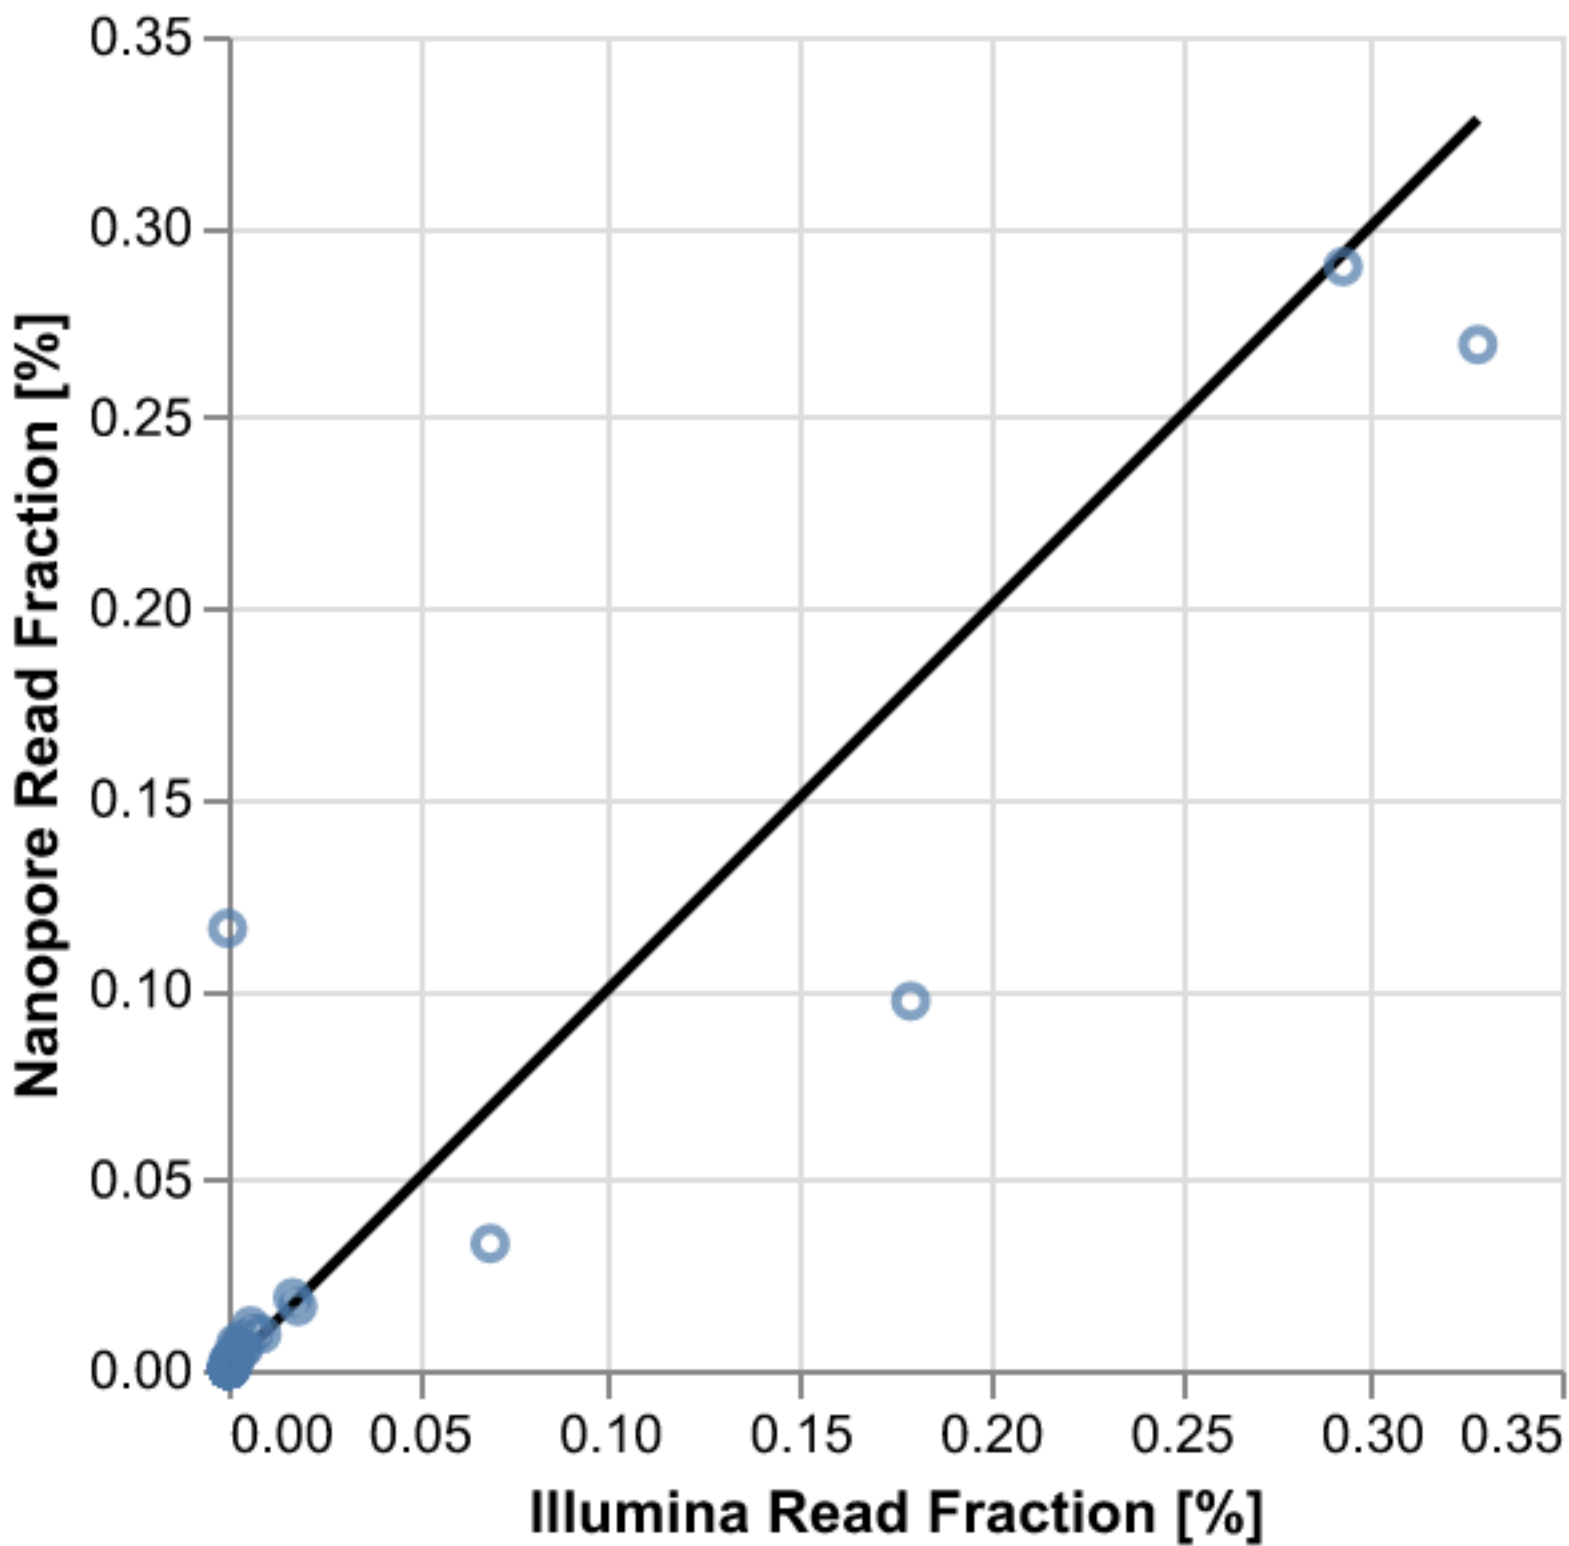

Supplement: 41598_2024_53506_MOESM12_ESM.pdf [file 41598_2024_53506_MOESM12_ESM.pdf]
