# Supplementary material for: Insights into gut microbiomes in stem cell transplantation by comprehensive shotgun long-read sequencing
Source: PubMed Central journal article supplement (PMC10876974; doi:10.1038/s41598-024-53506-1), 2024-02-19
Supplement: 41598_2024_53506_MOESM7_ESM.pdf [file 41598_2024_53506_MOESM7_ESM.pdf]

# Akkermansia muciniphila

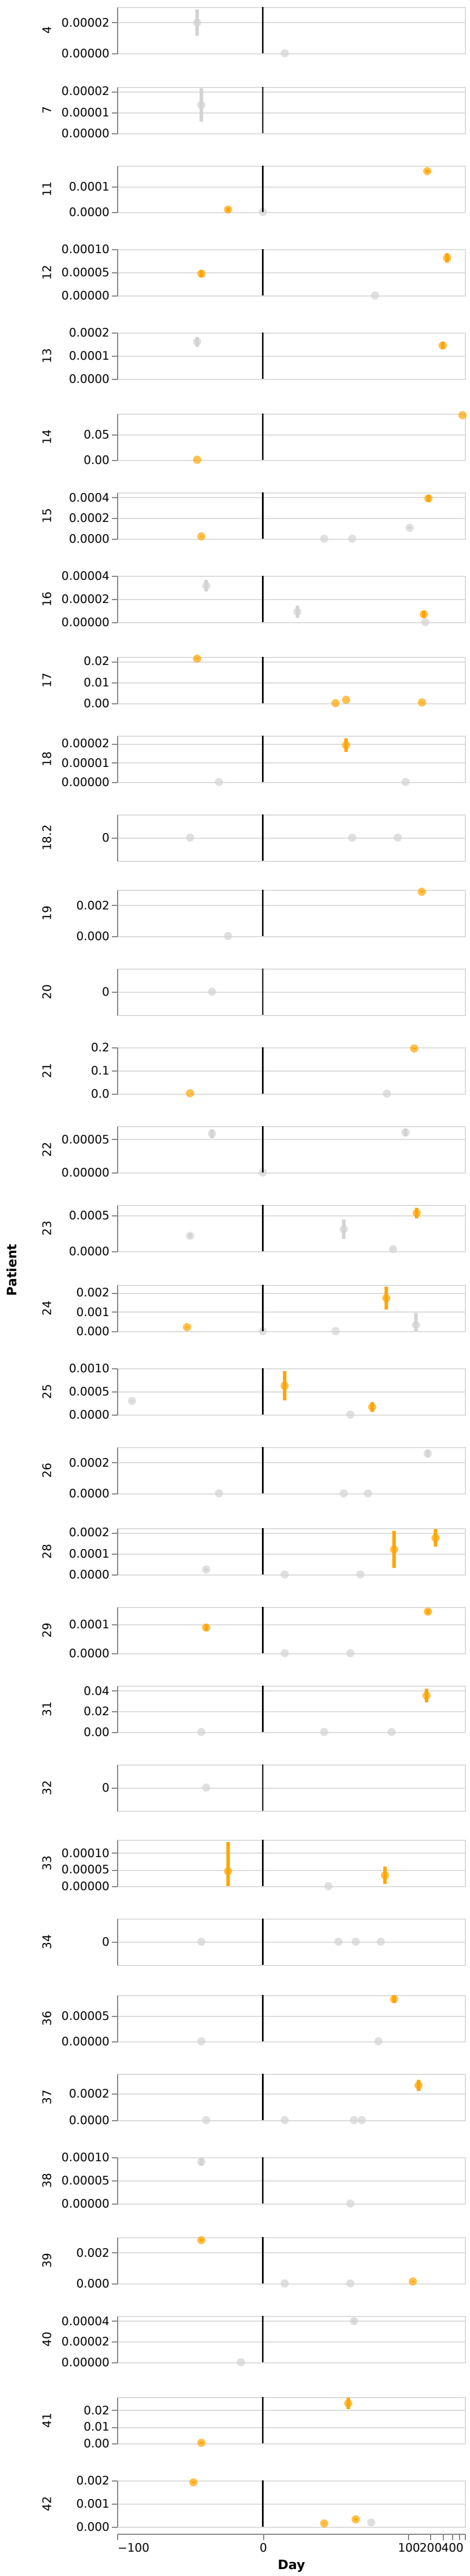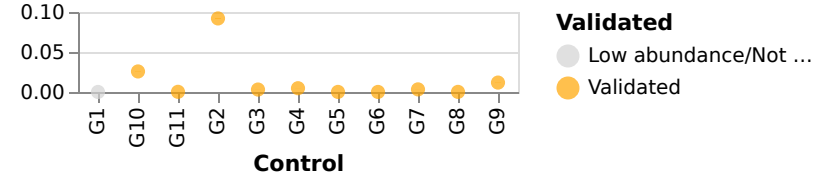

**Validated**

● Low abundance/Not ...

● Validated

Control

G1 G10 G11 G2 G3 G4 G5 G6 G7 G8 G9

Patient

Day

-100 0 100 200 400

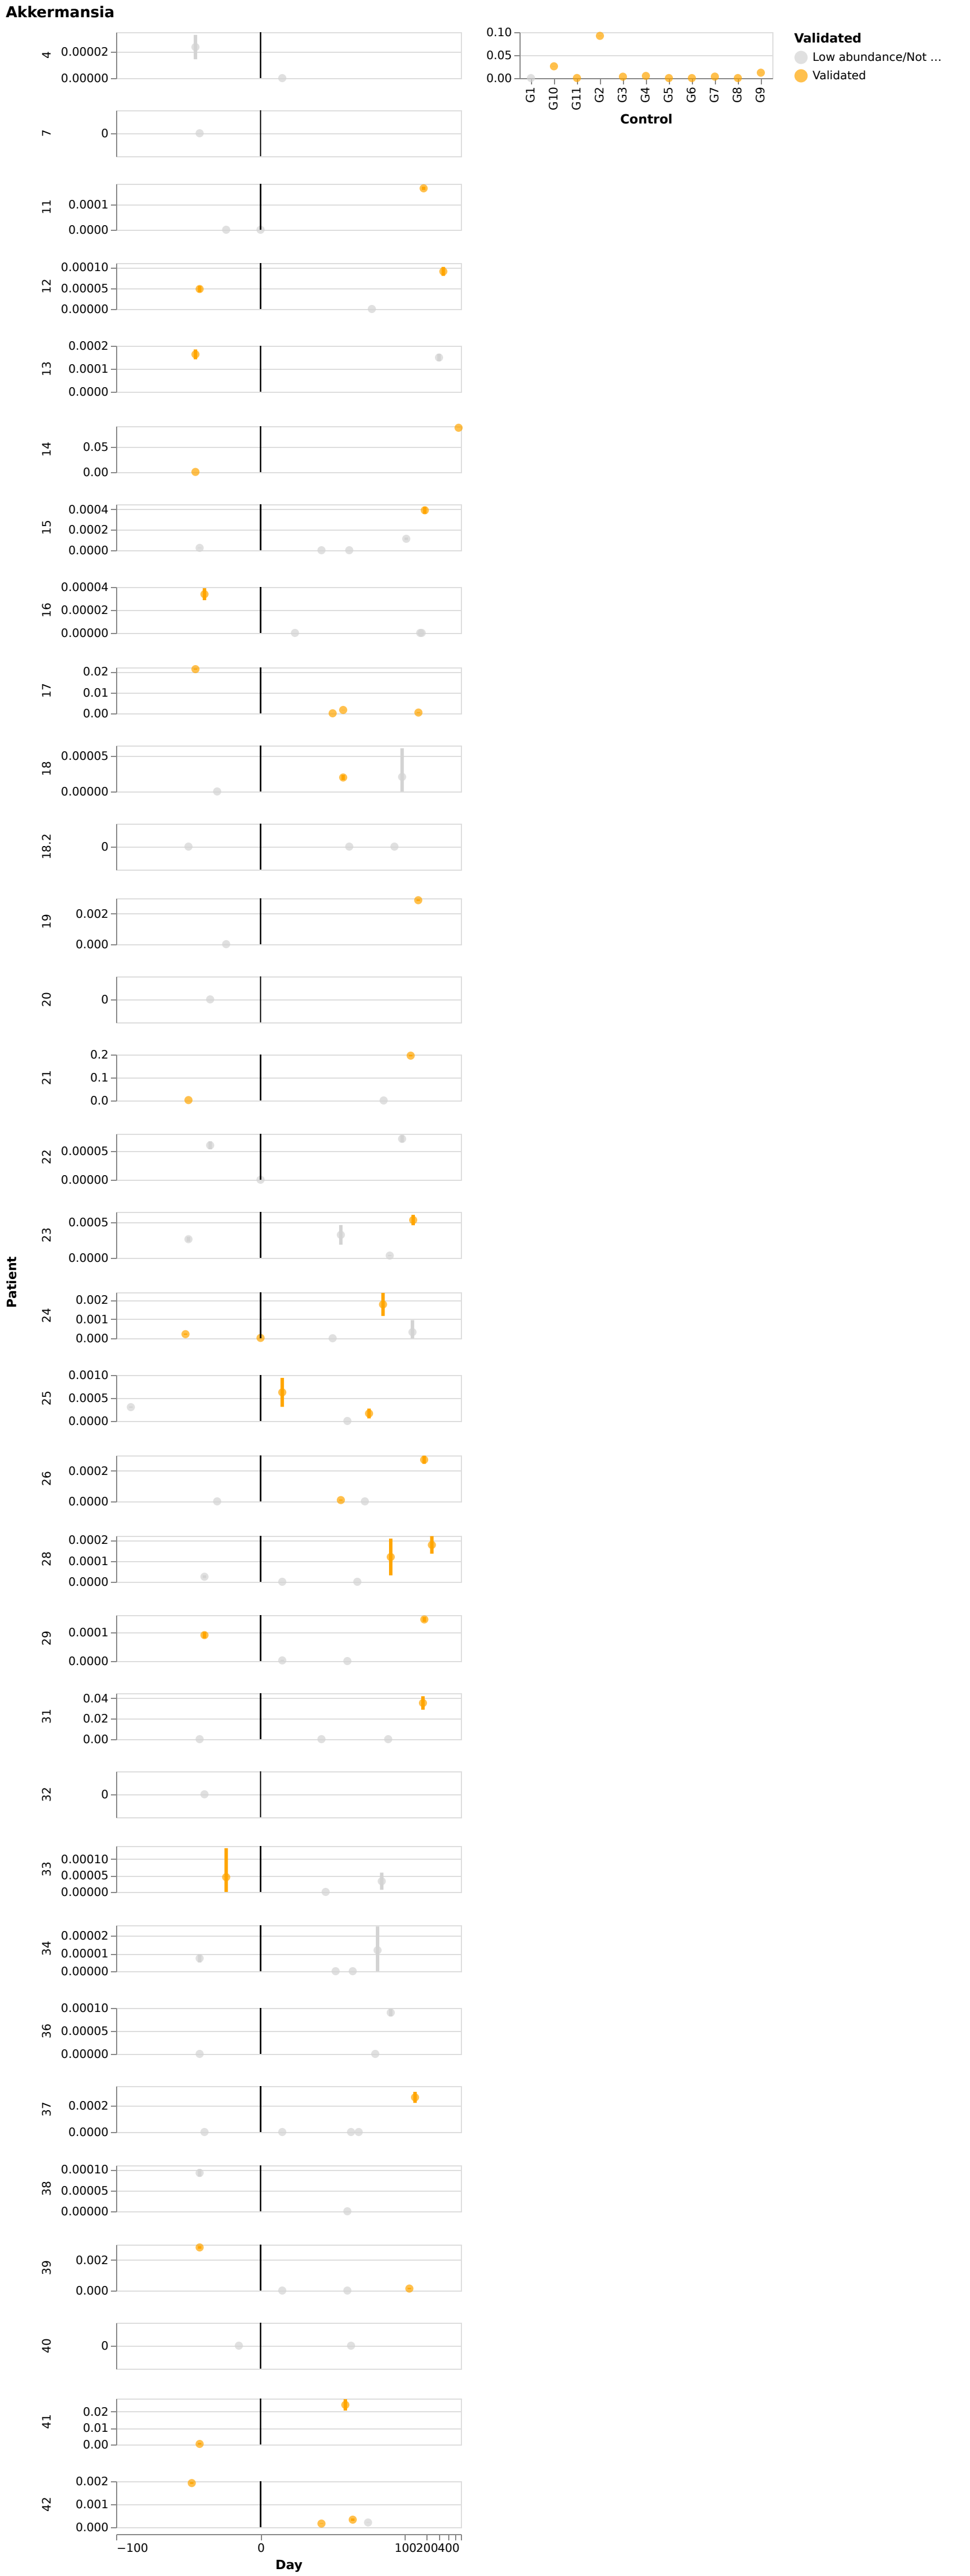

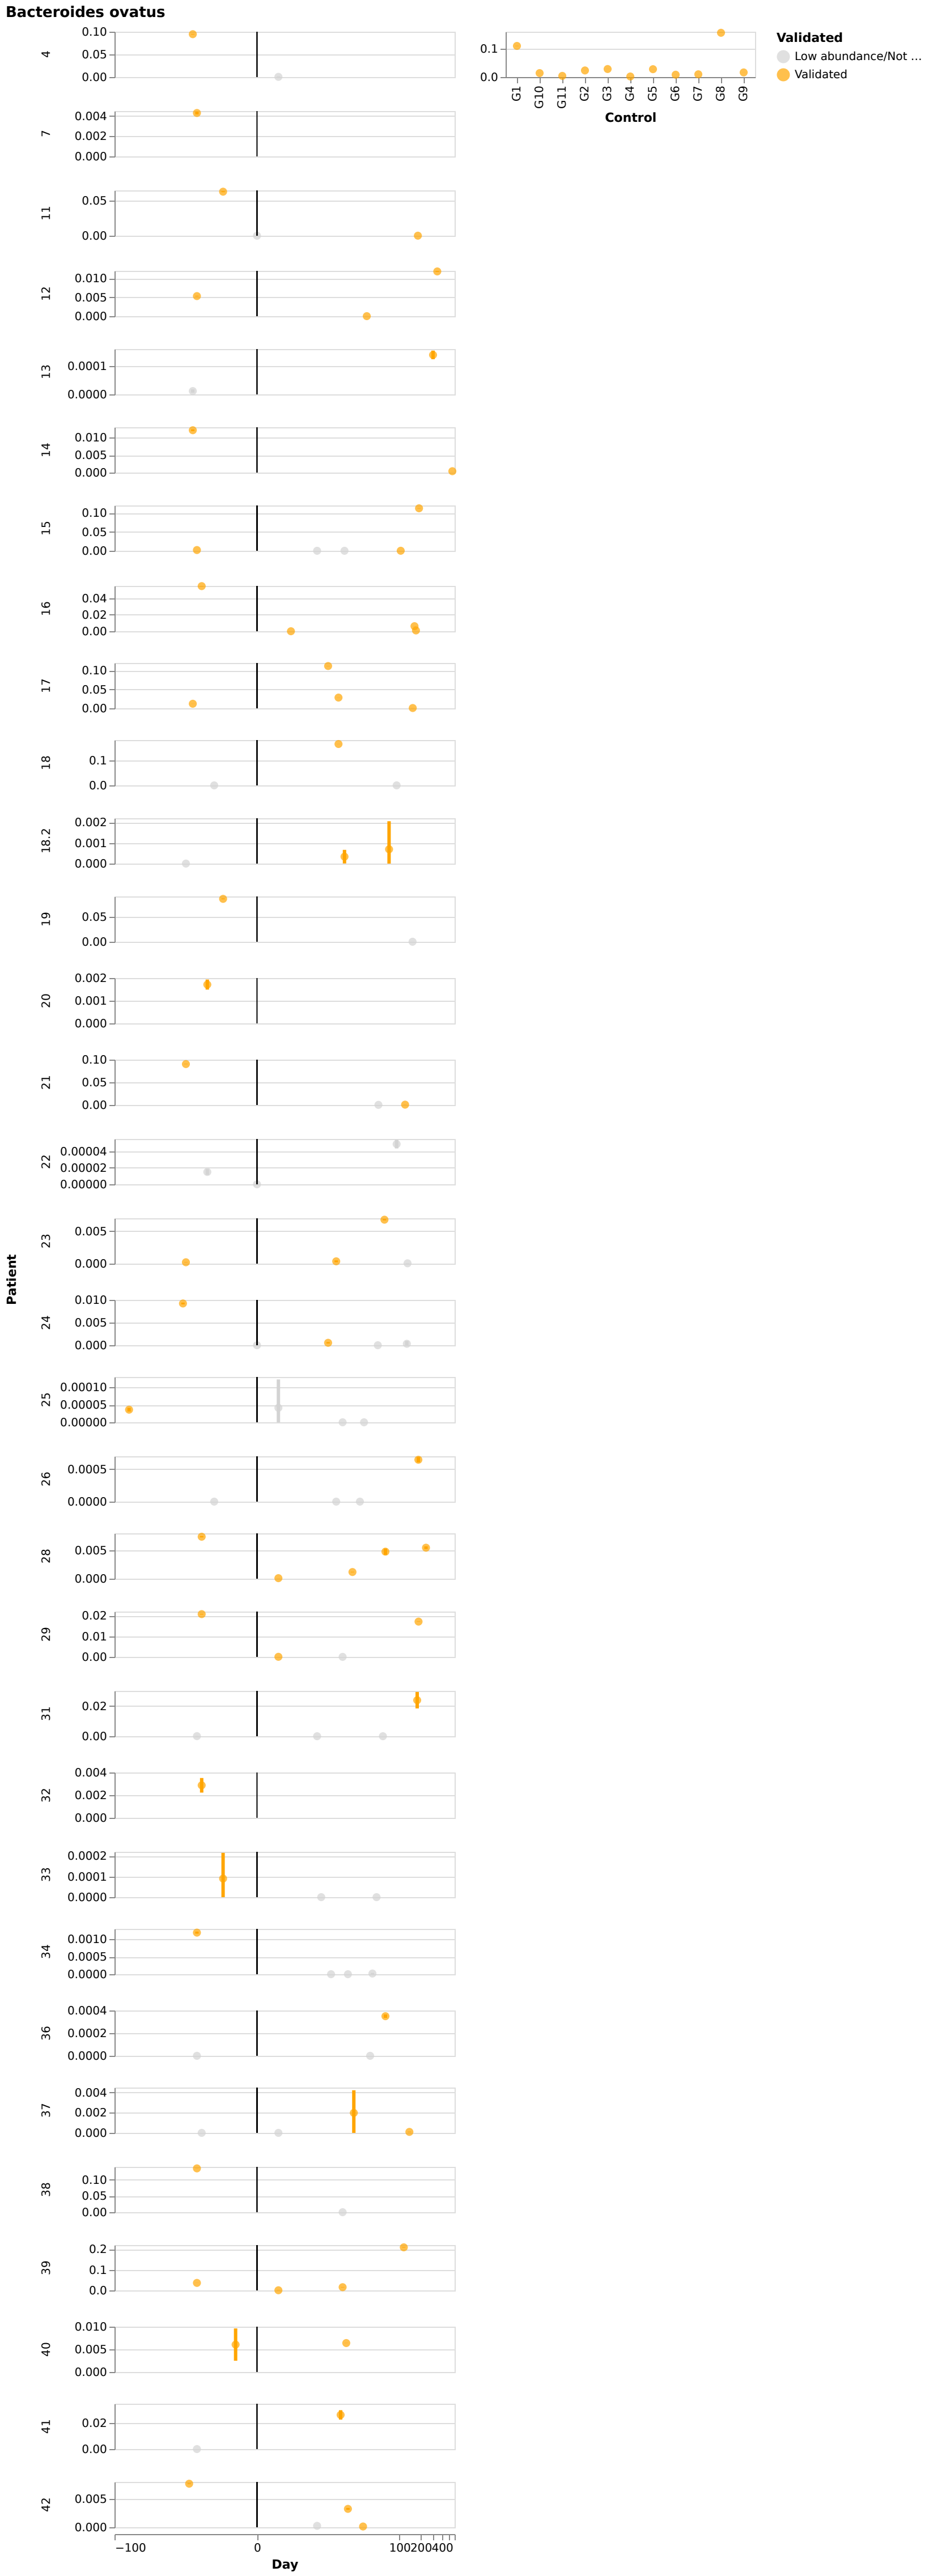

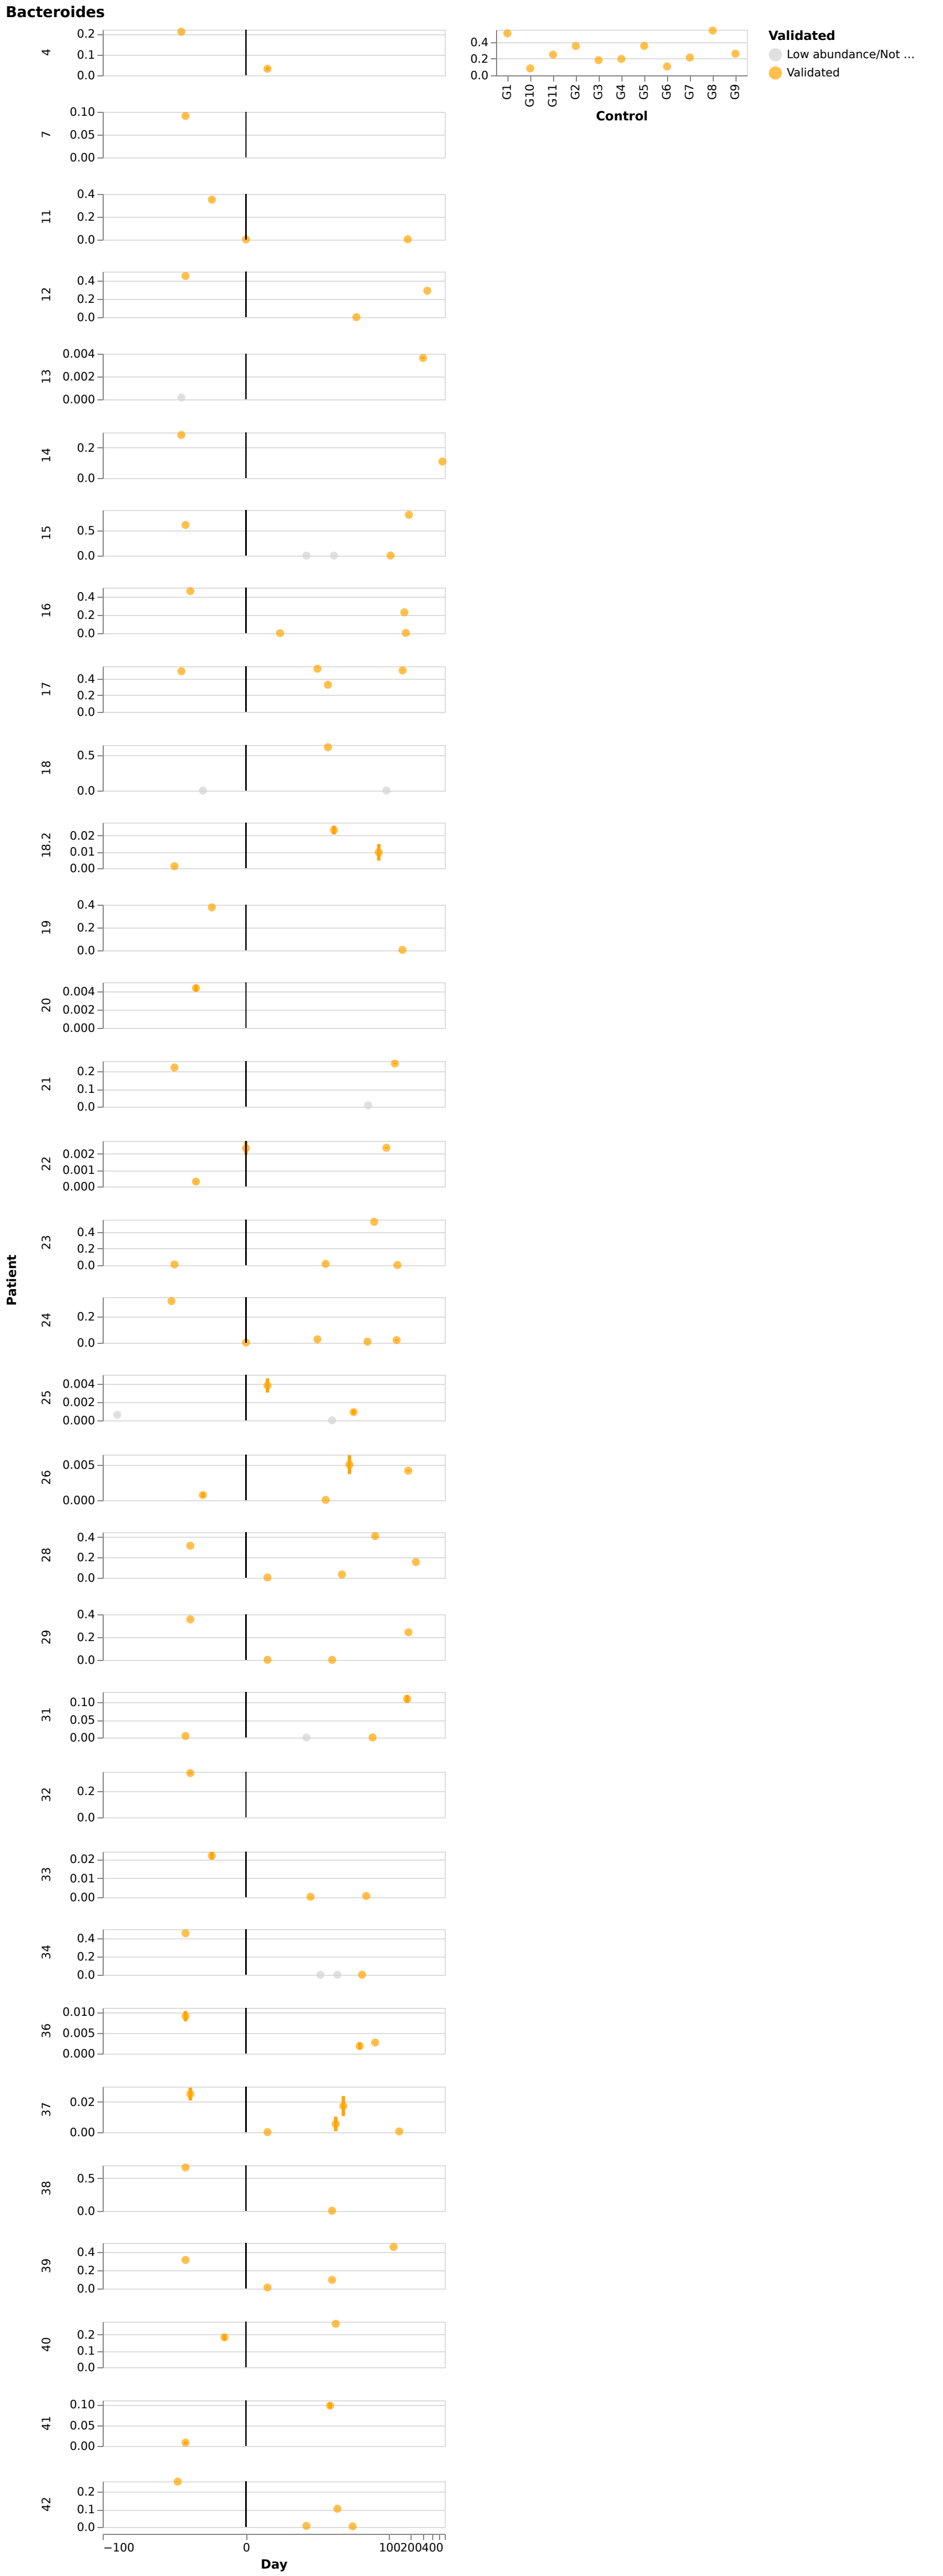

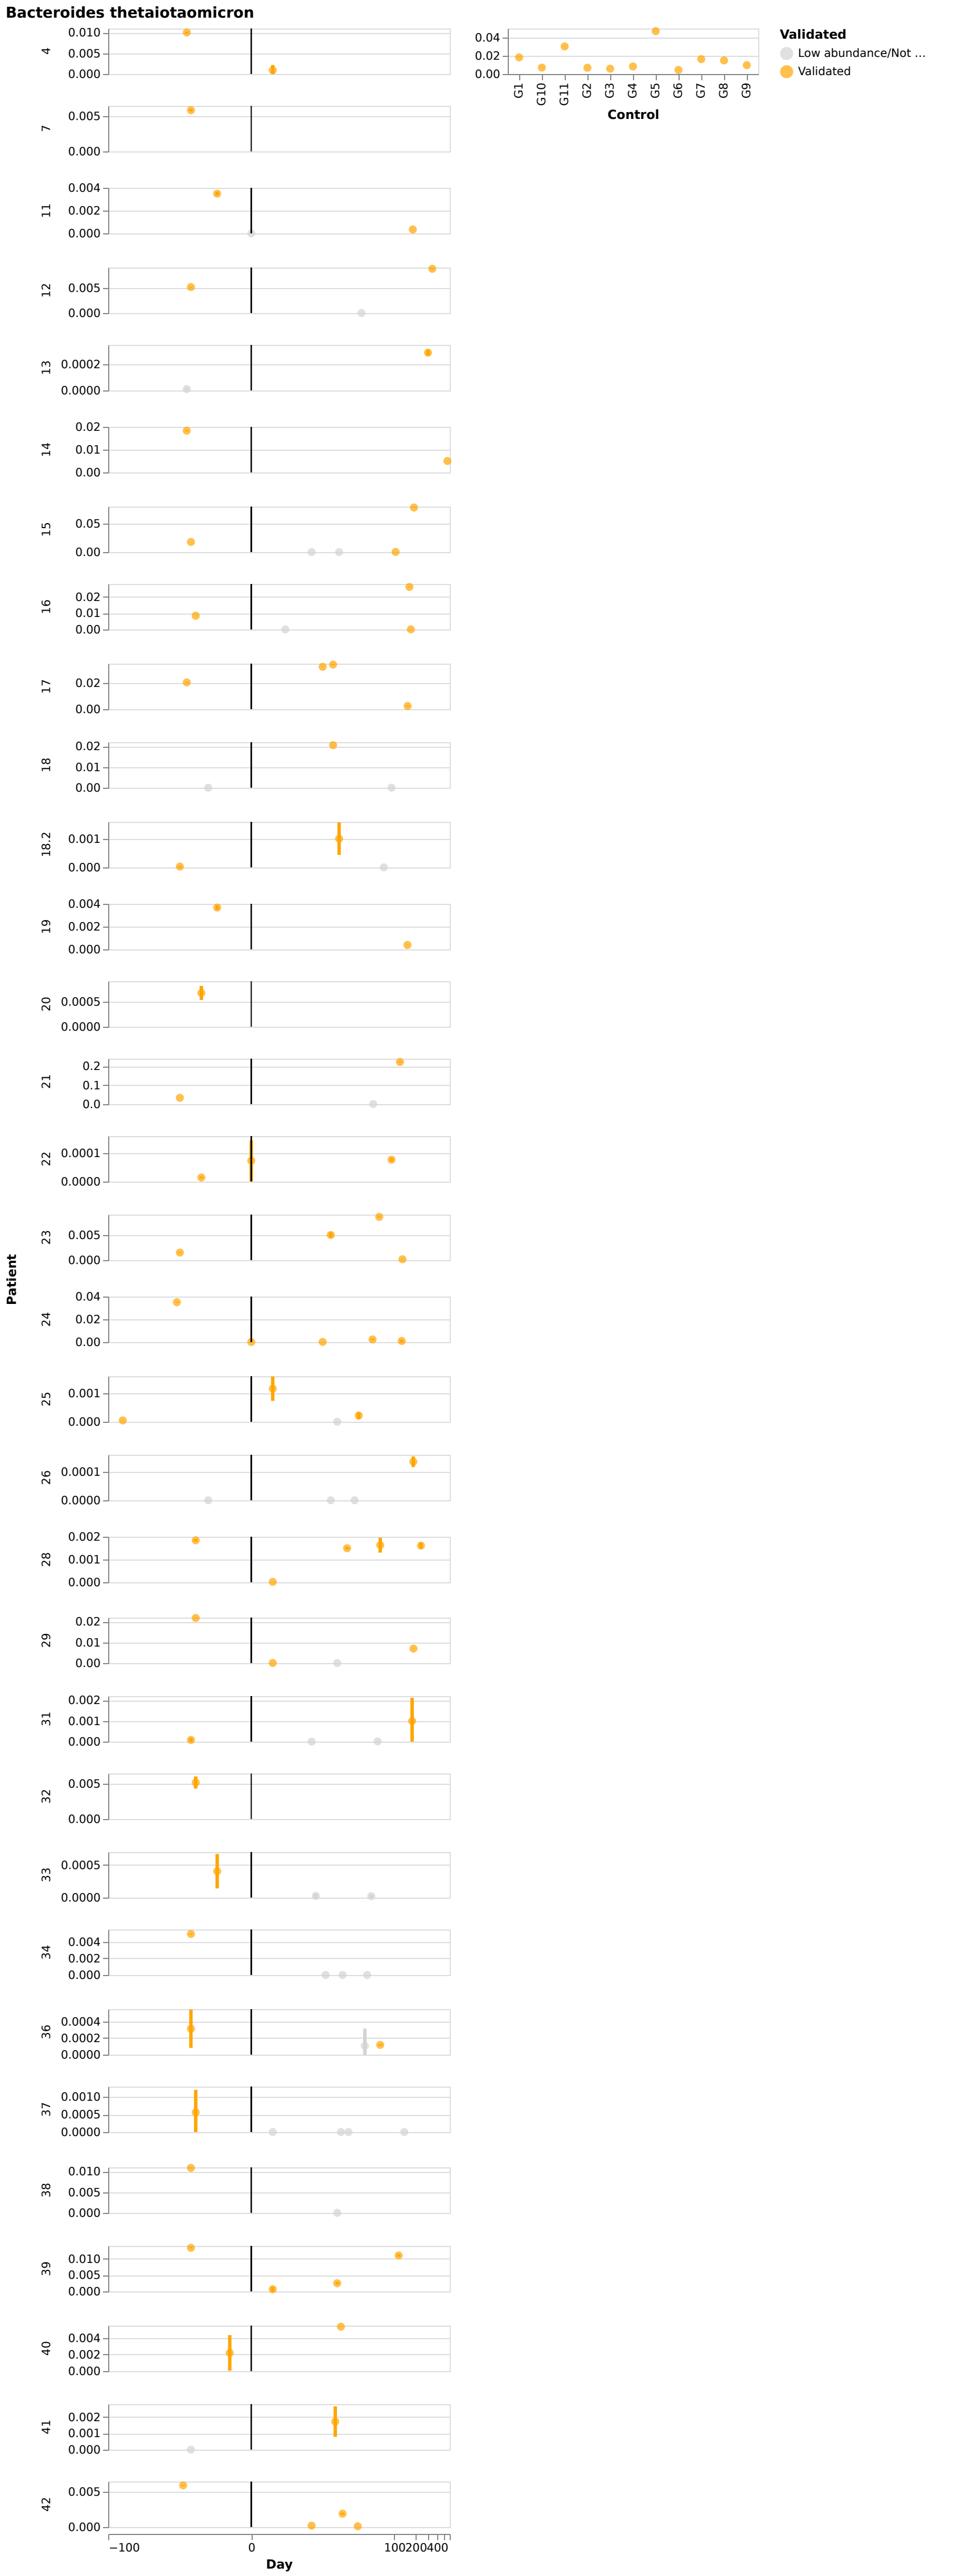

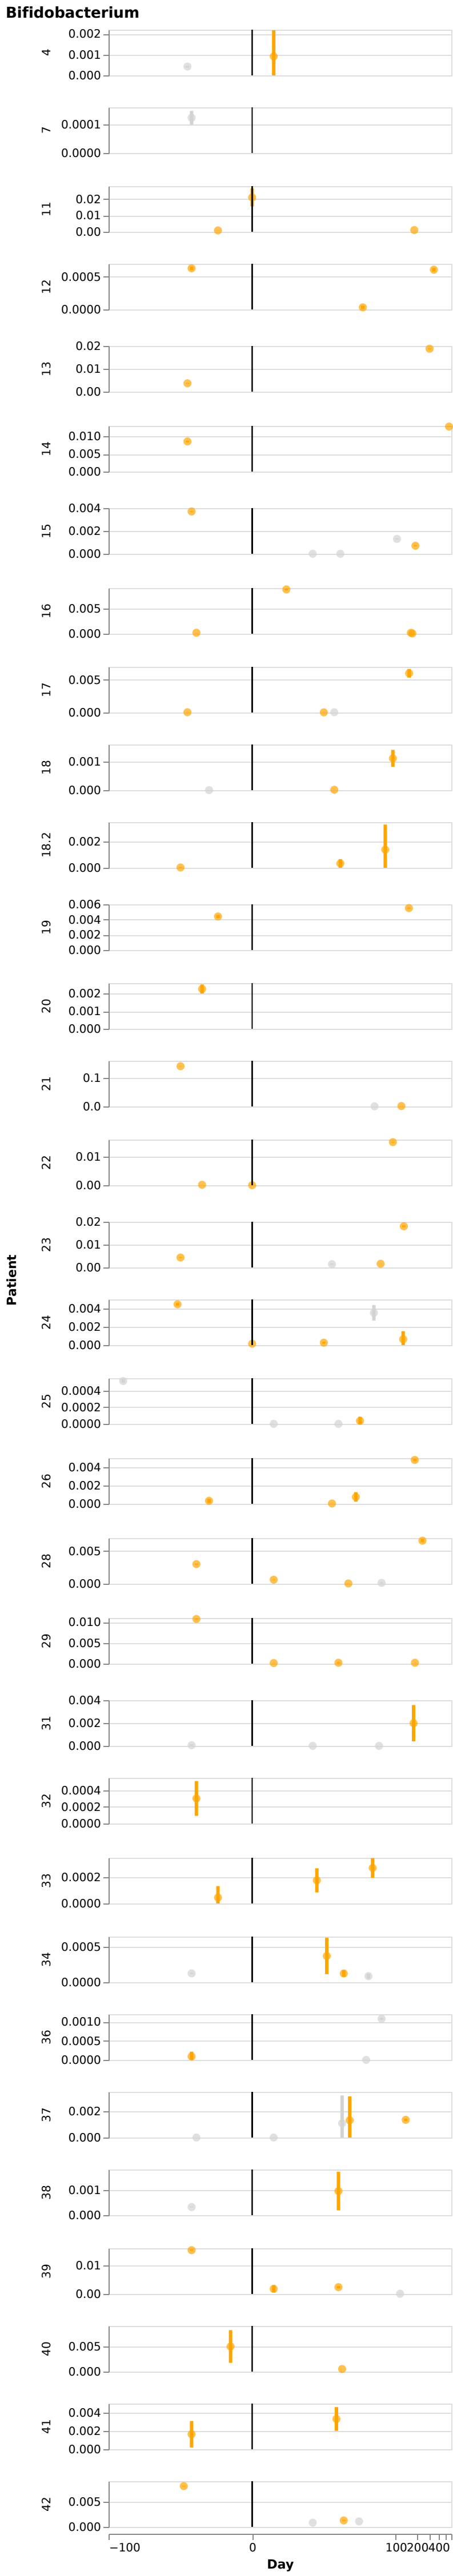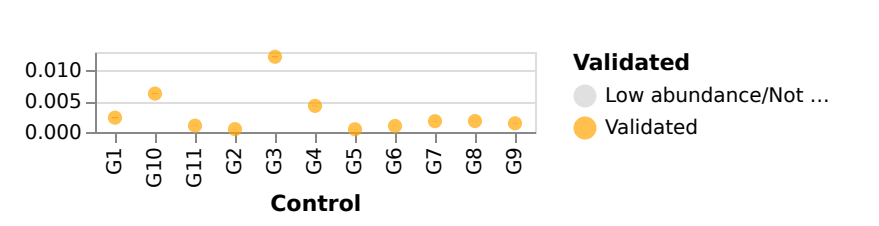

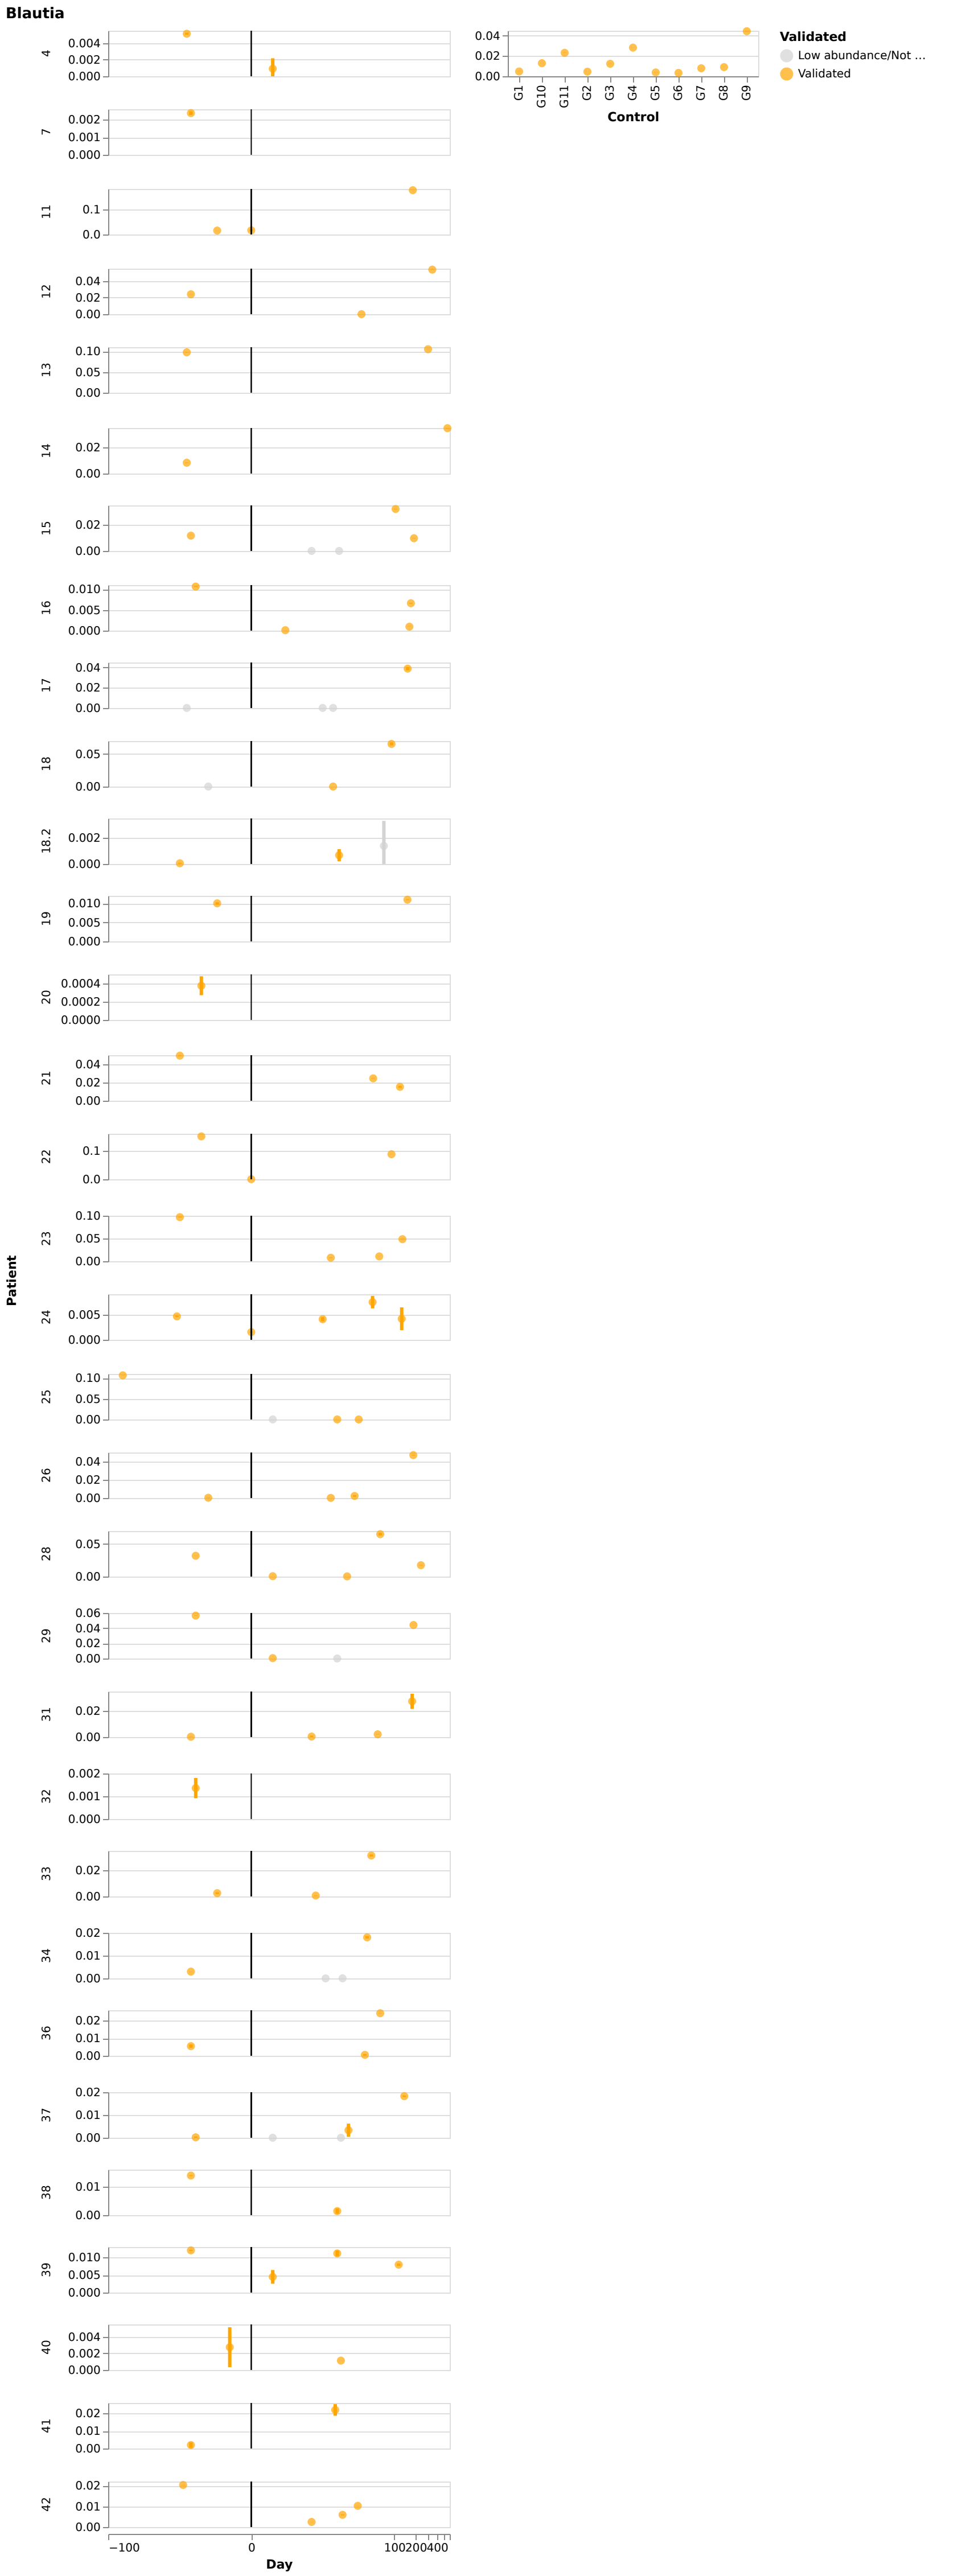

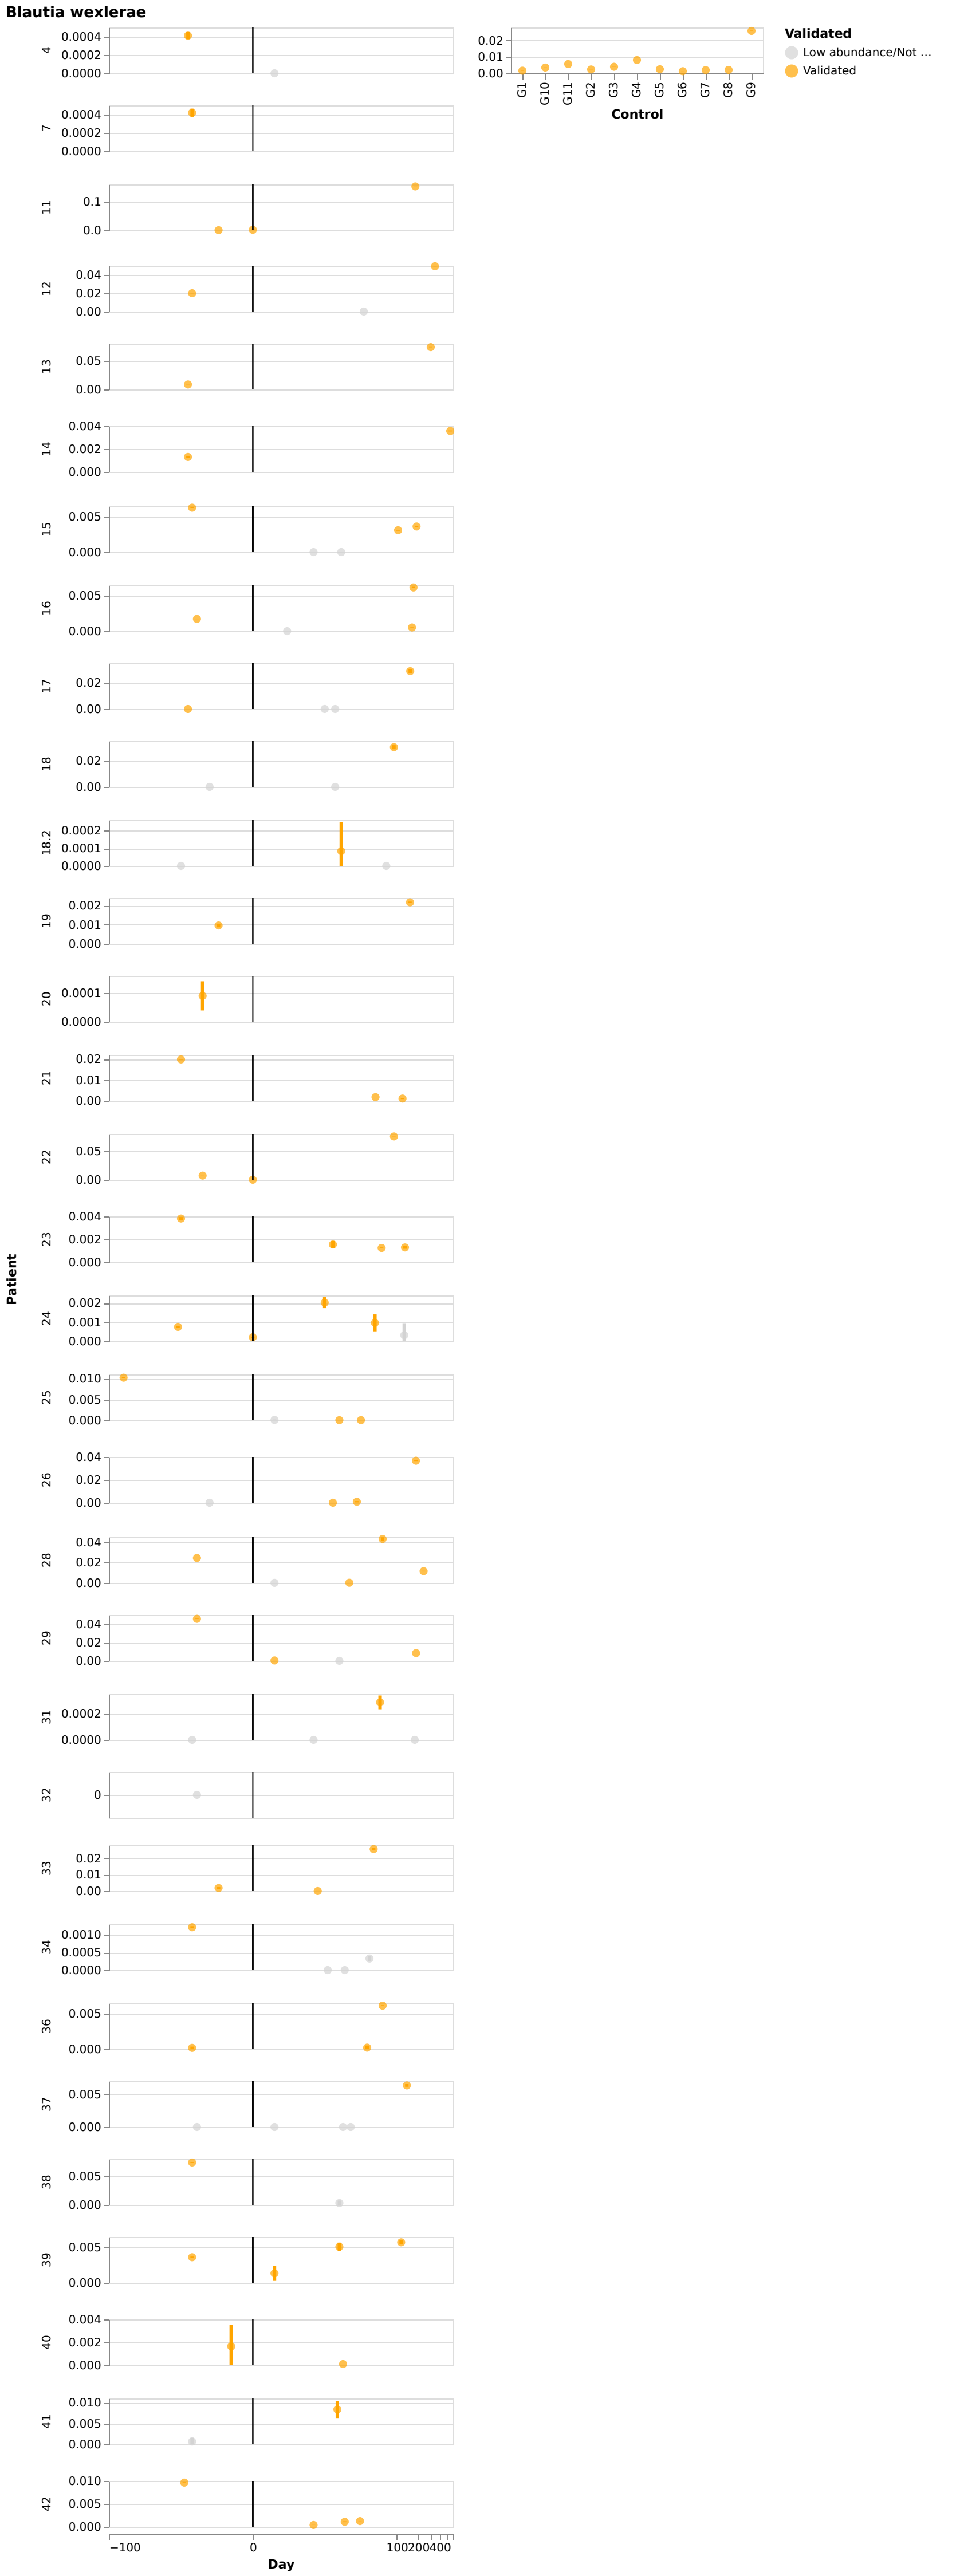



# Candida albicans

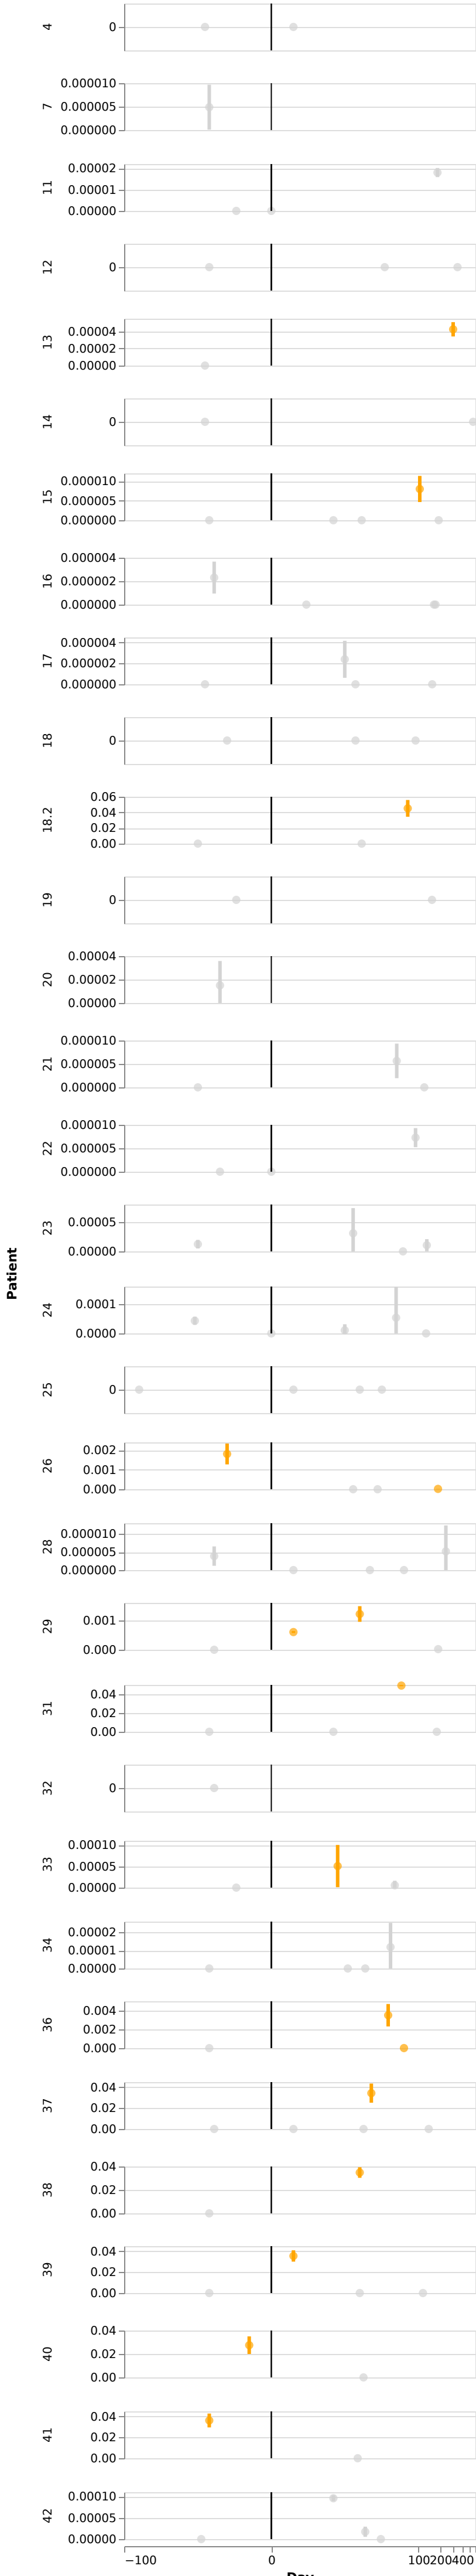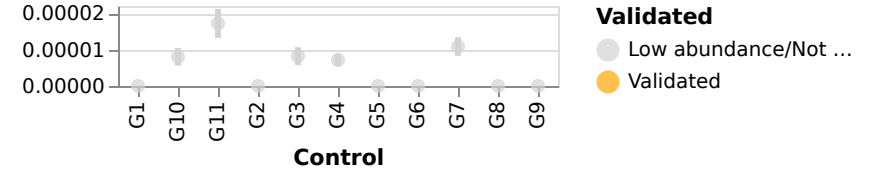

**Validated**  
● Low abundance/Not ...  
● Validated

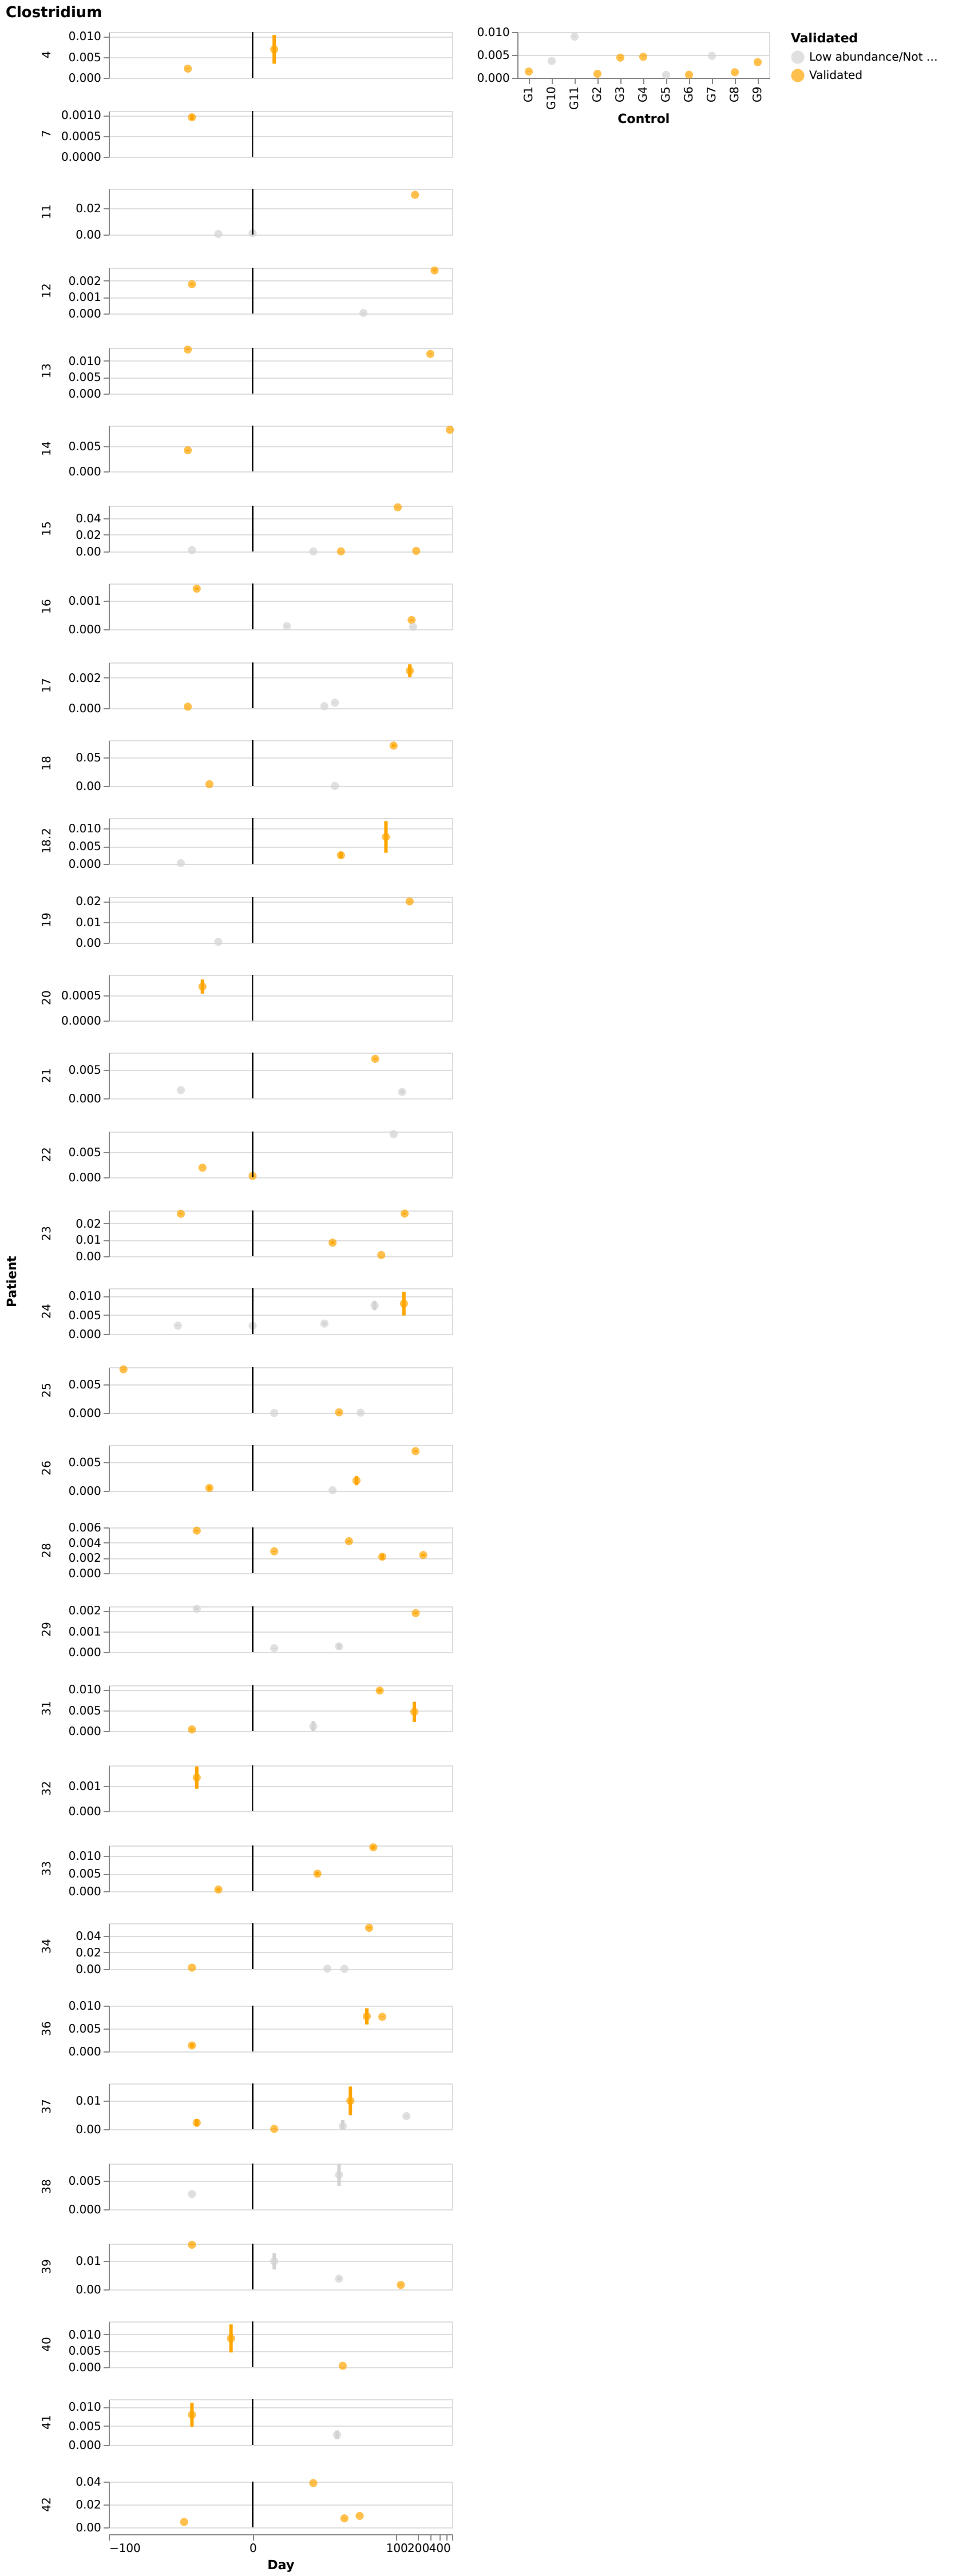

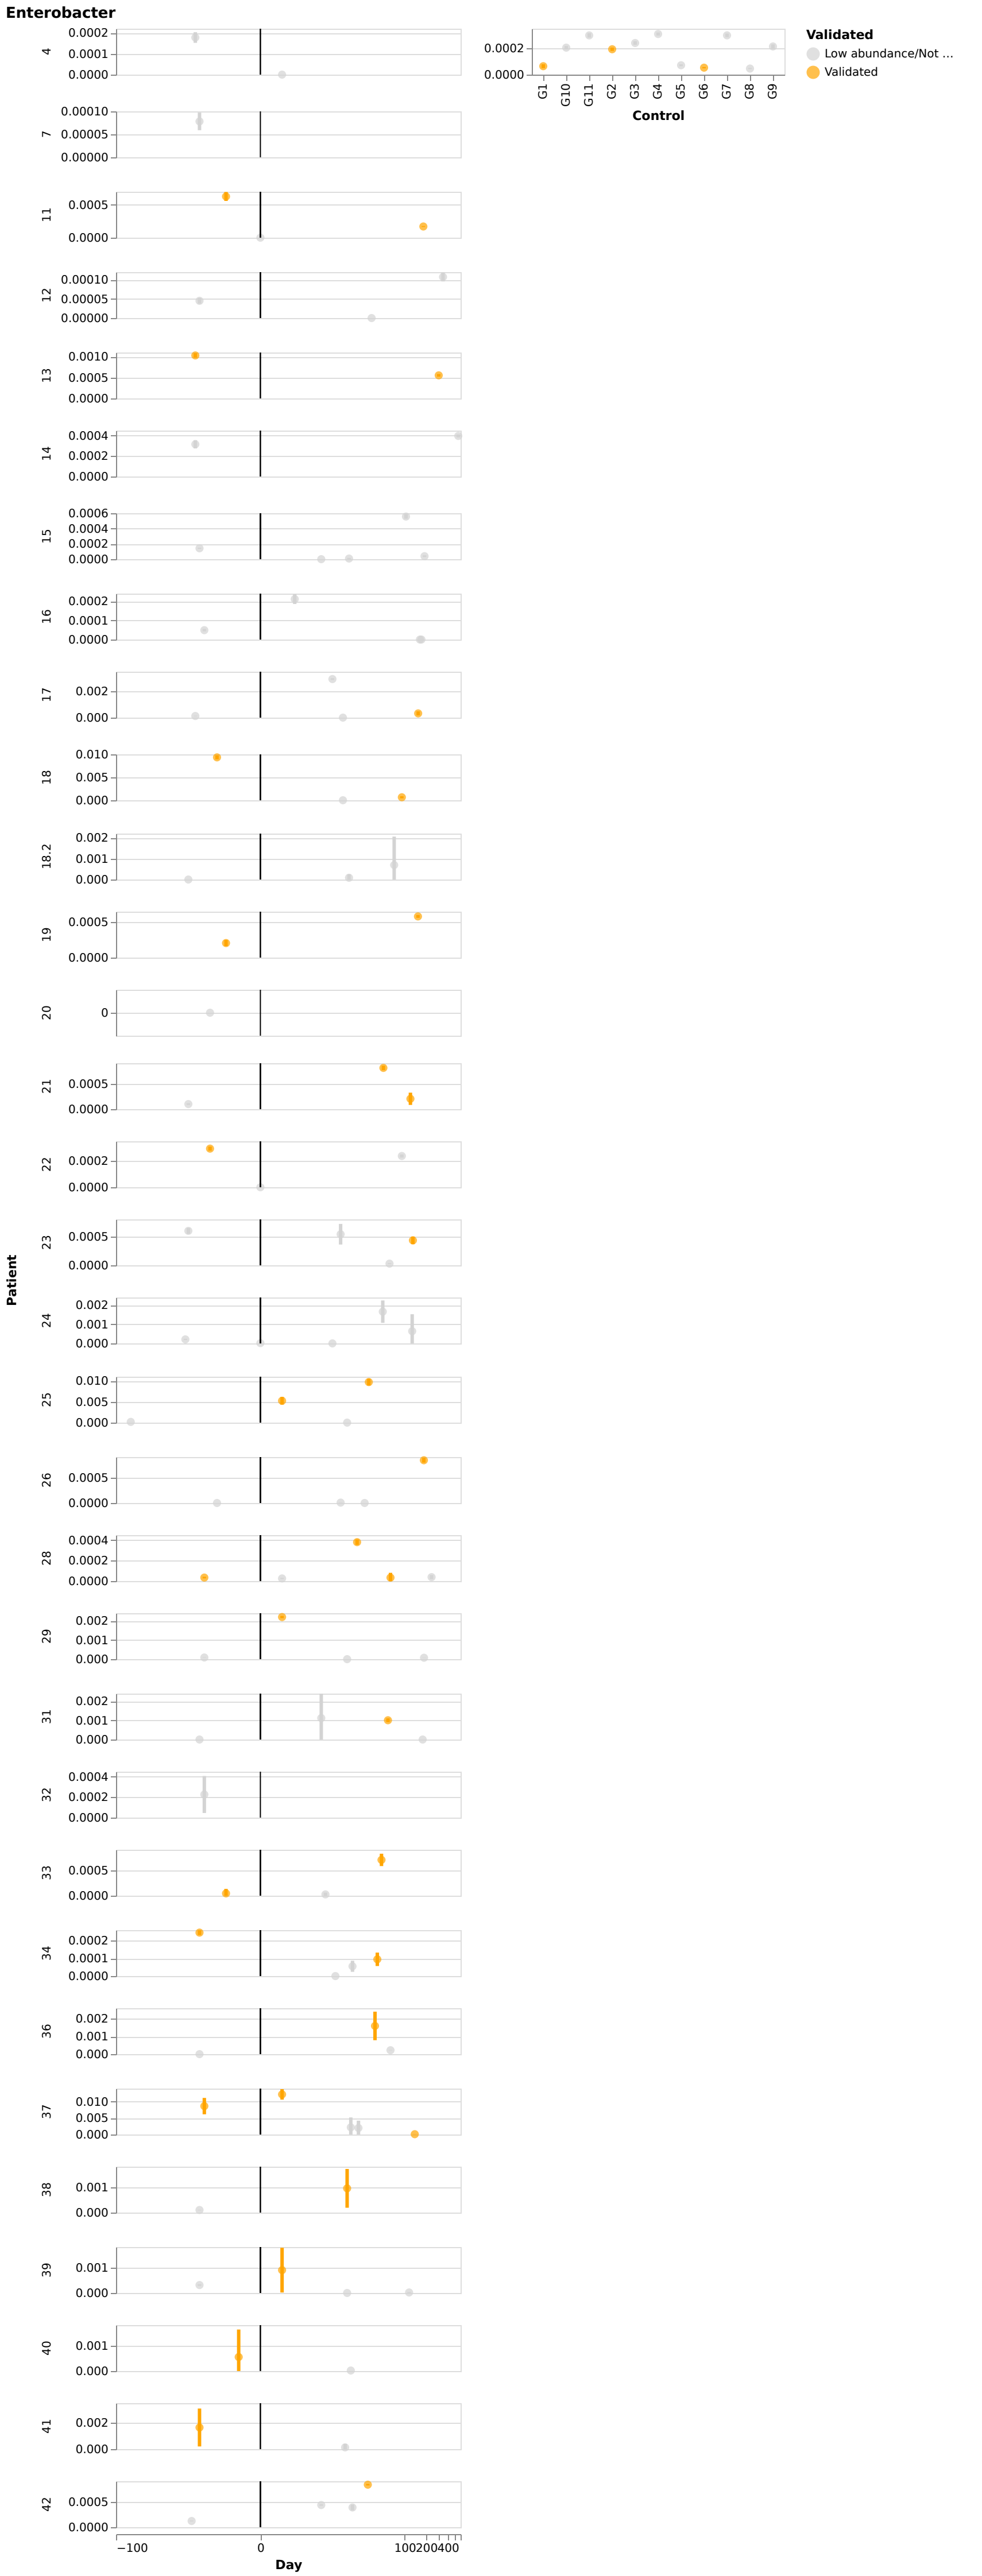

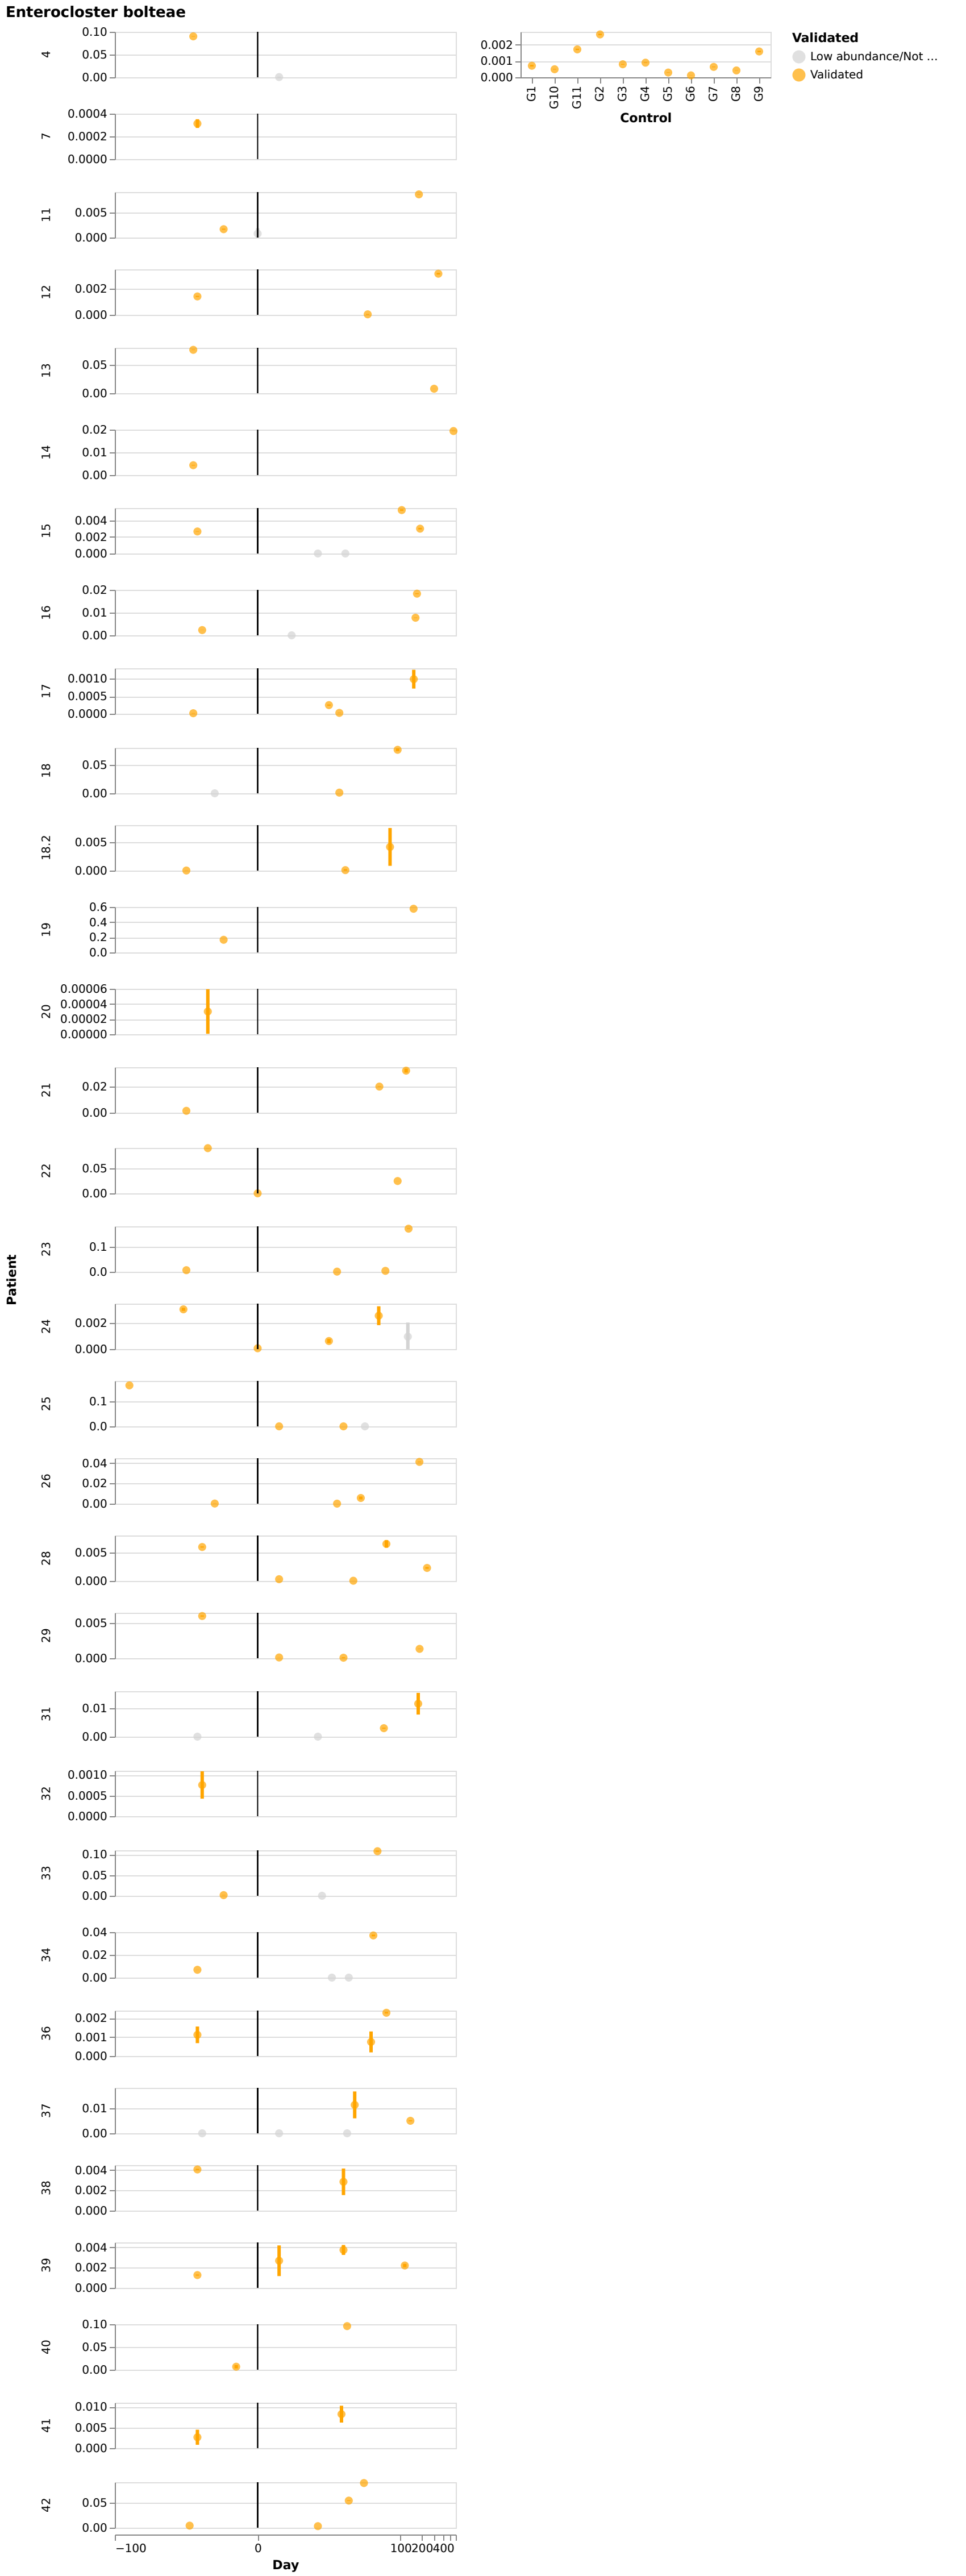

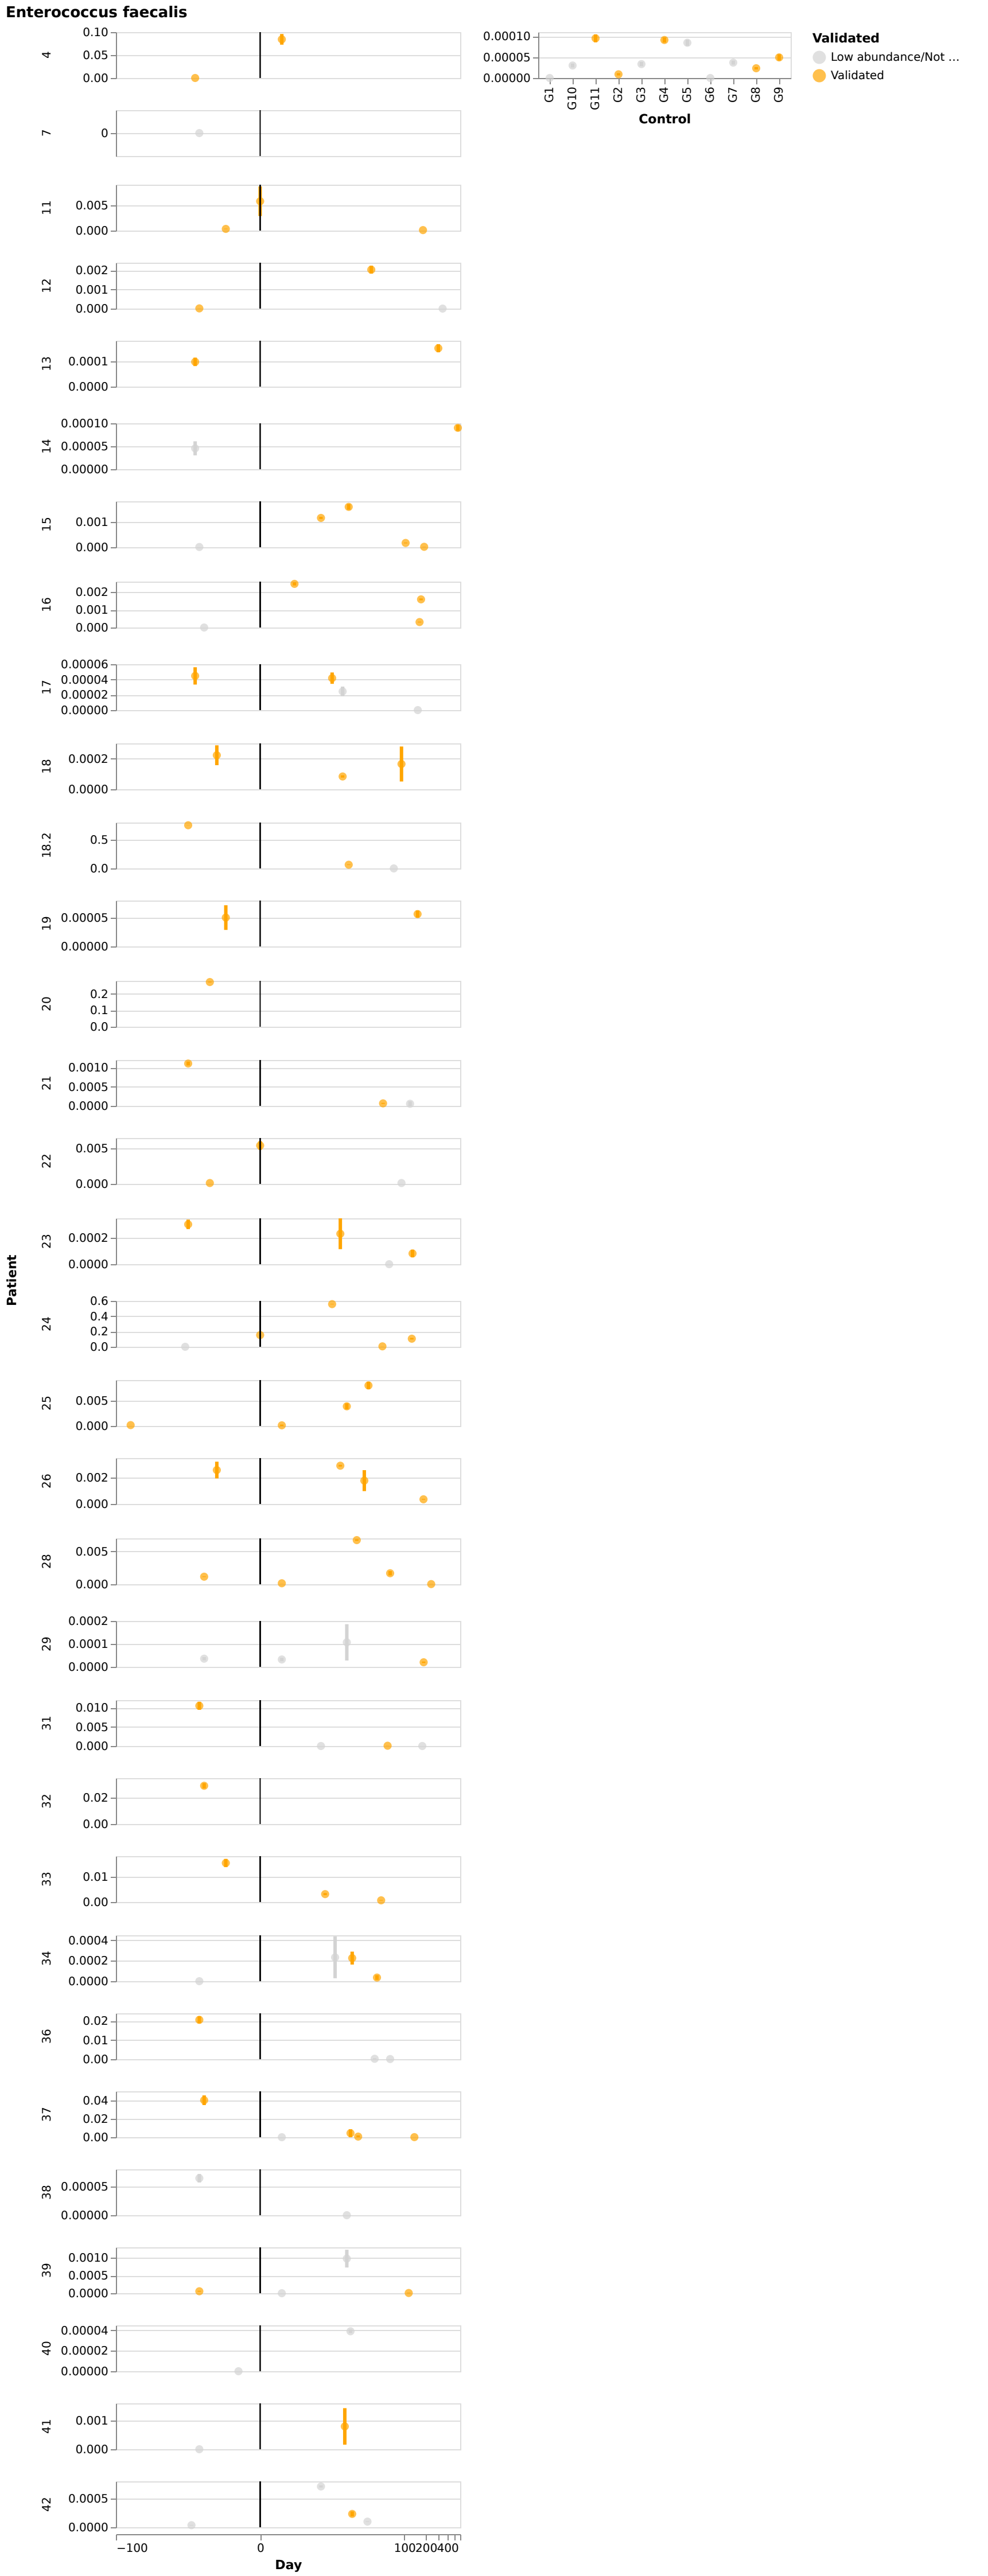

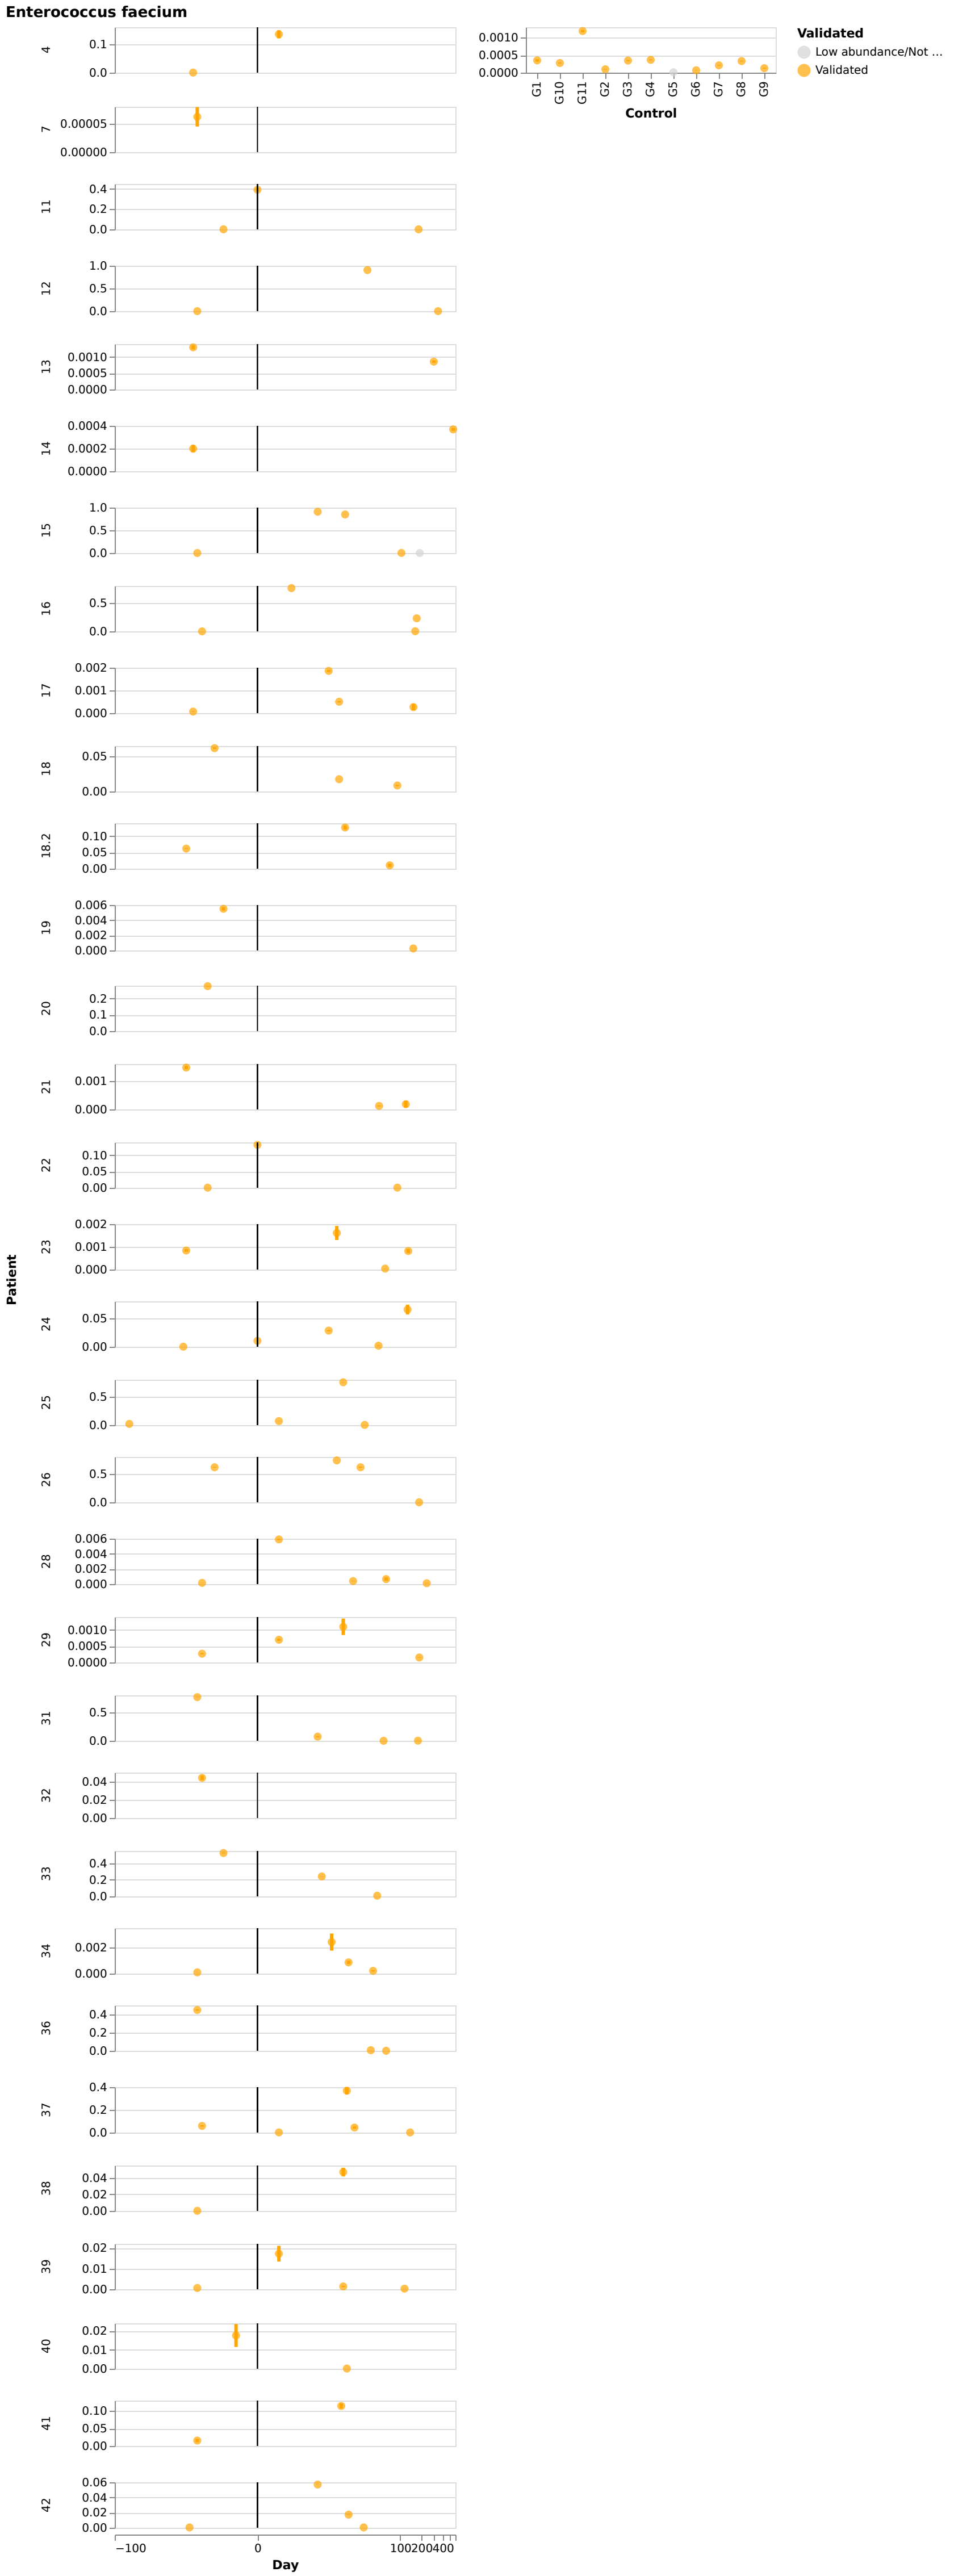

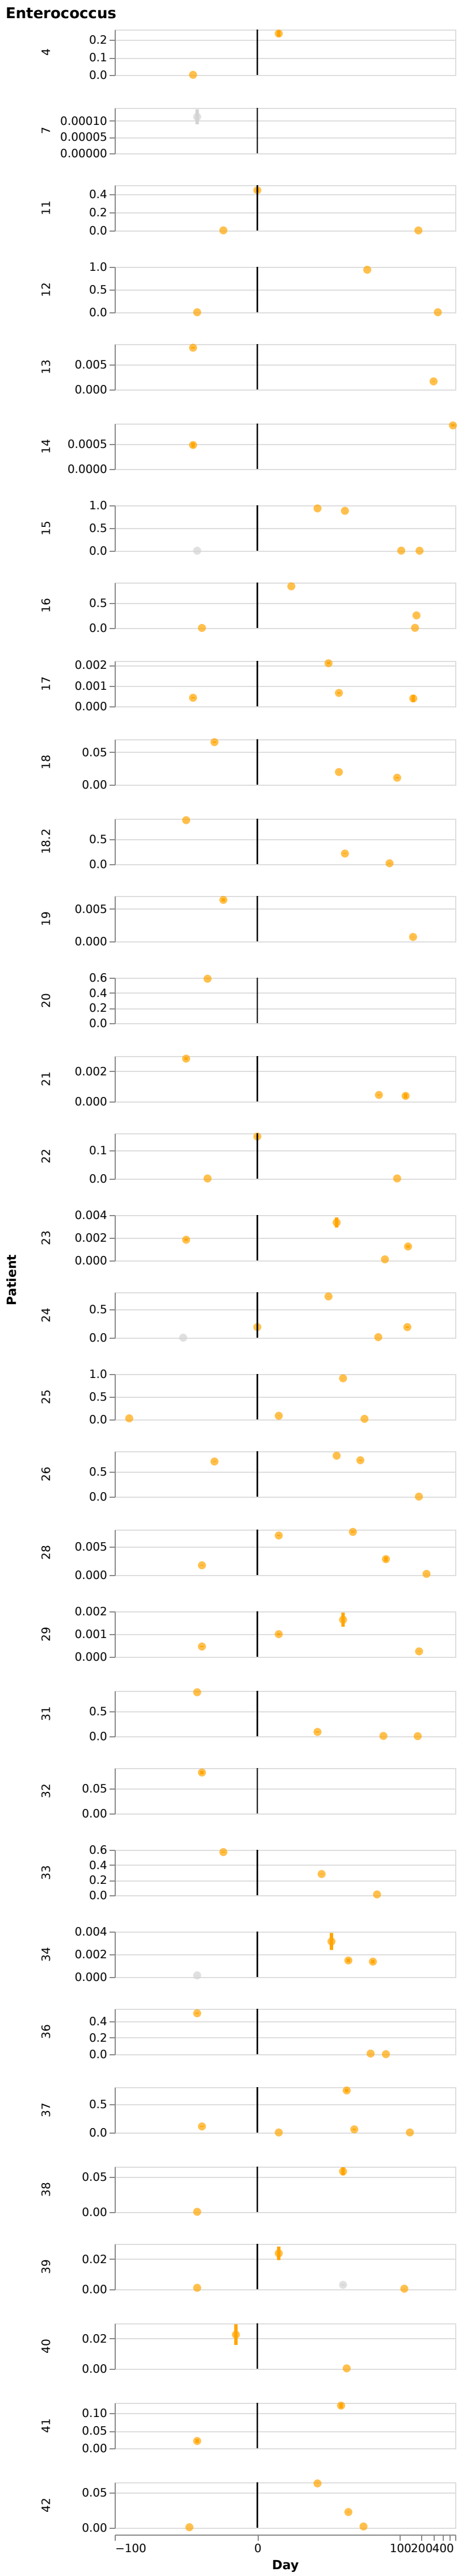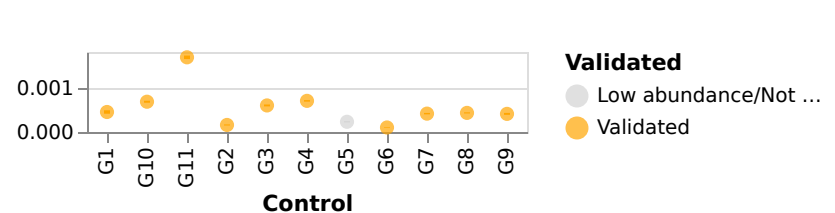

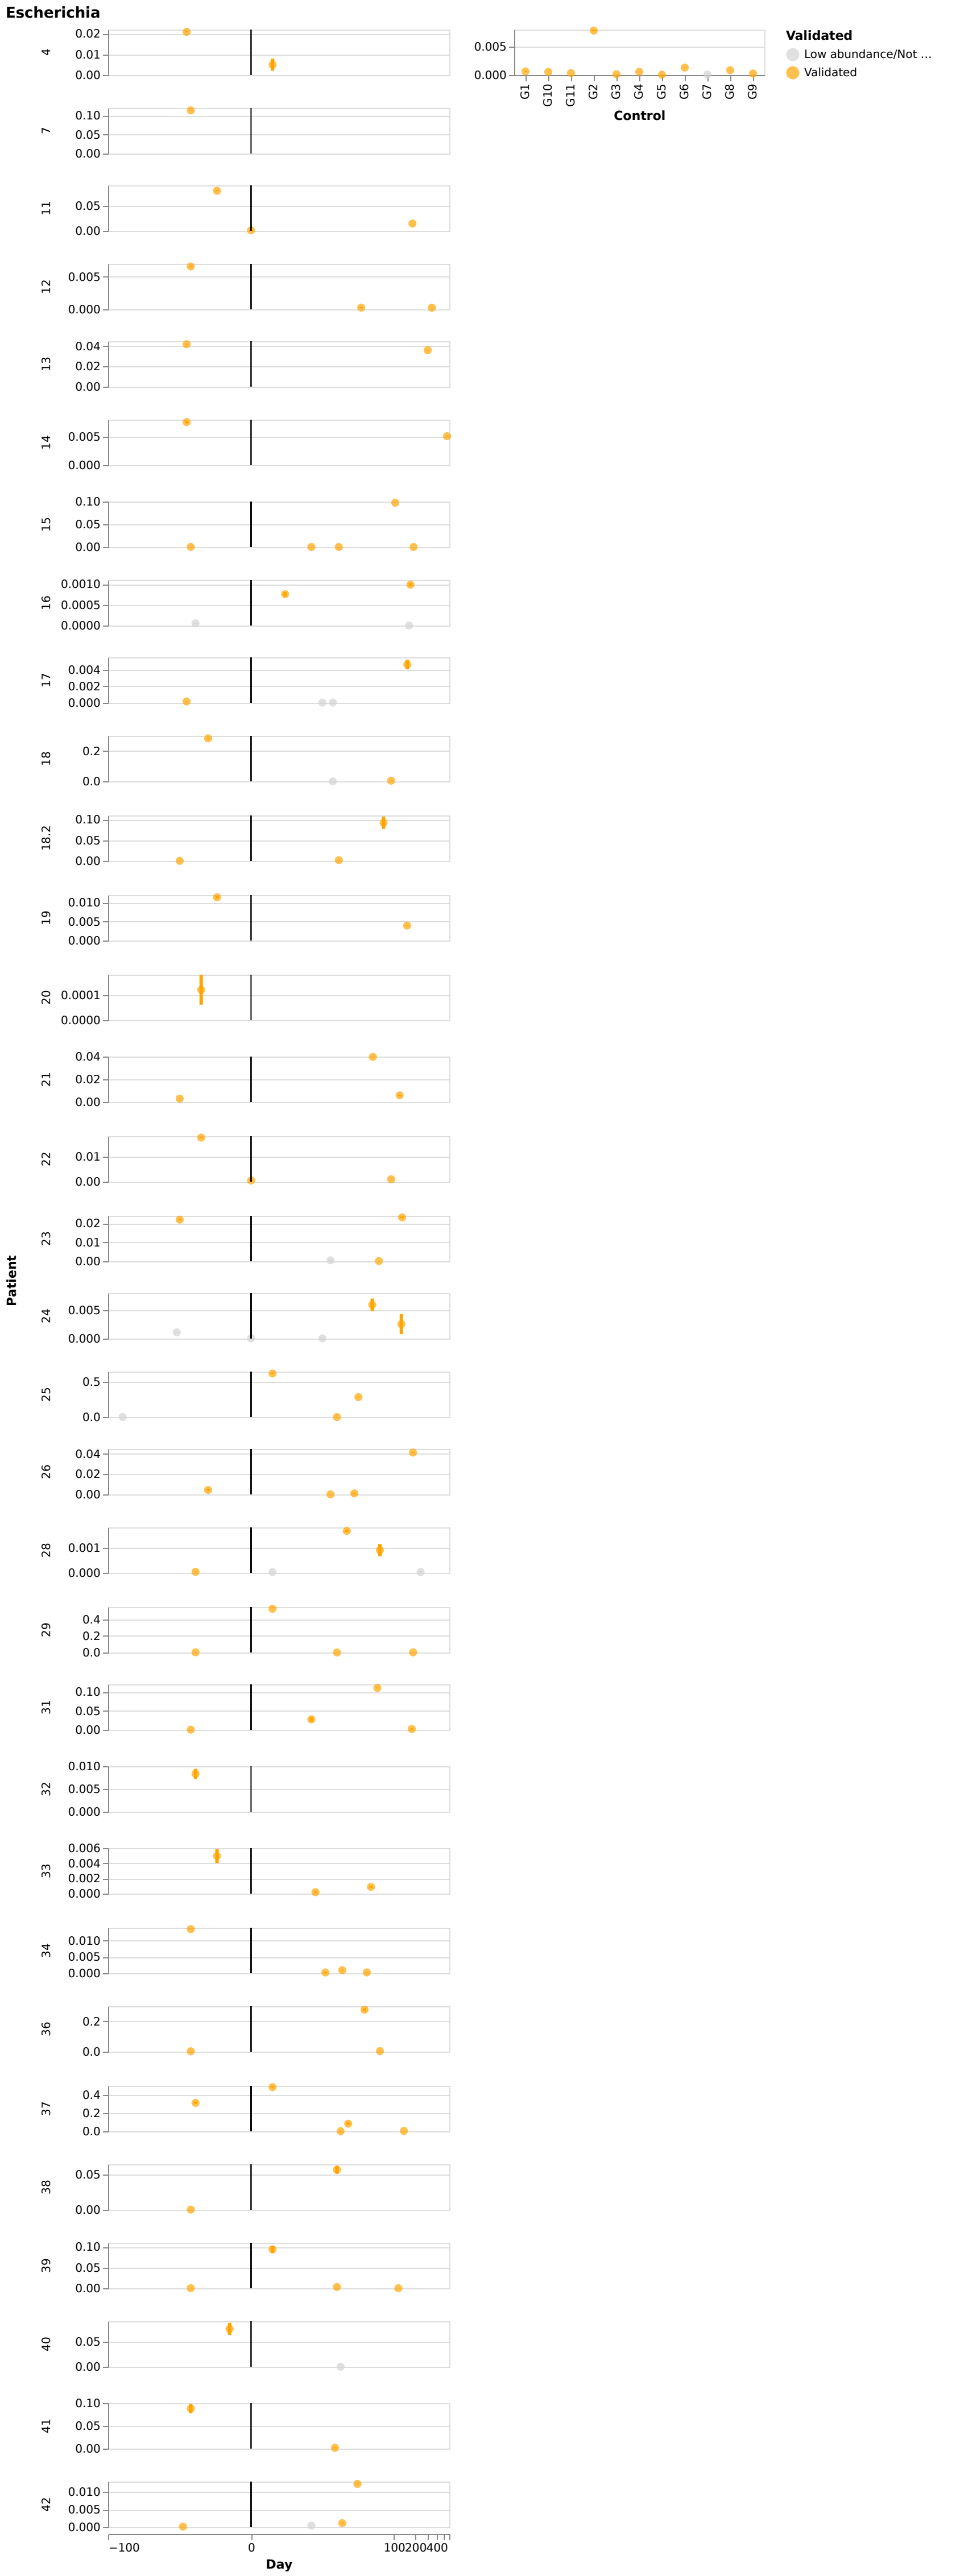



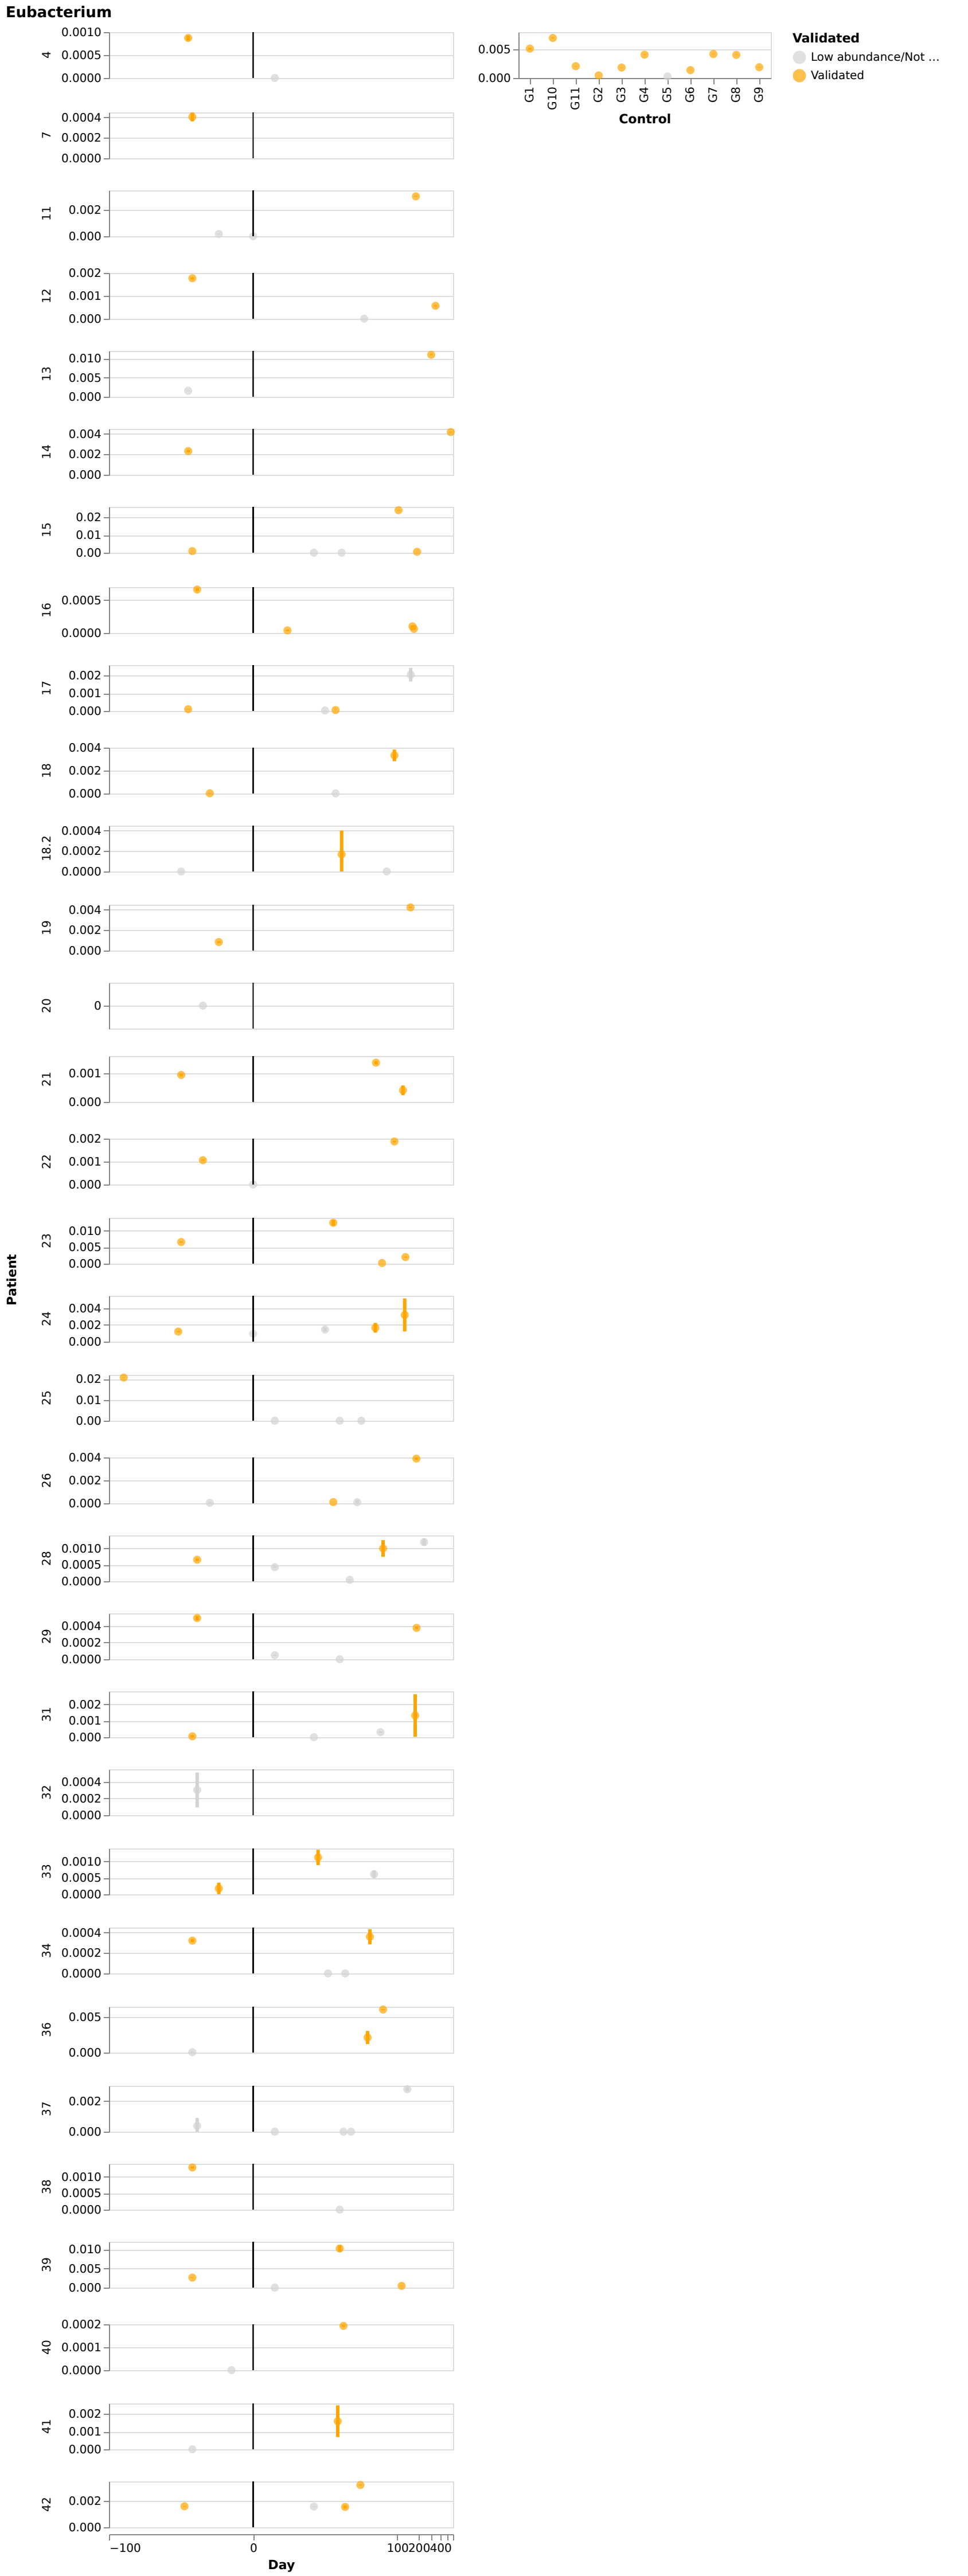

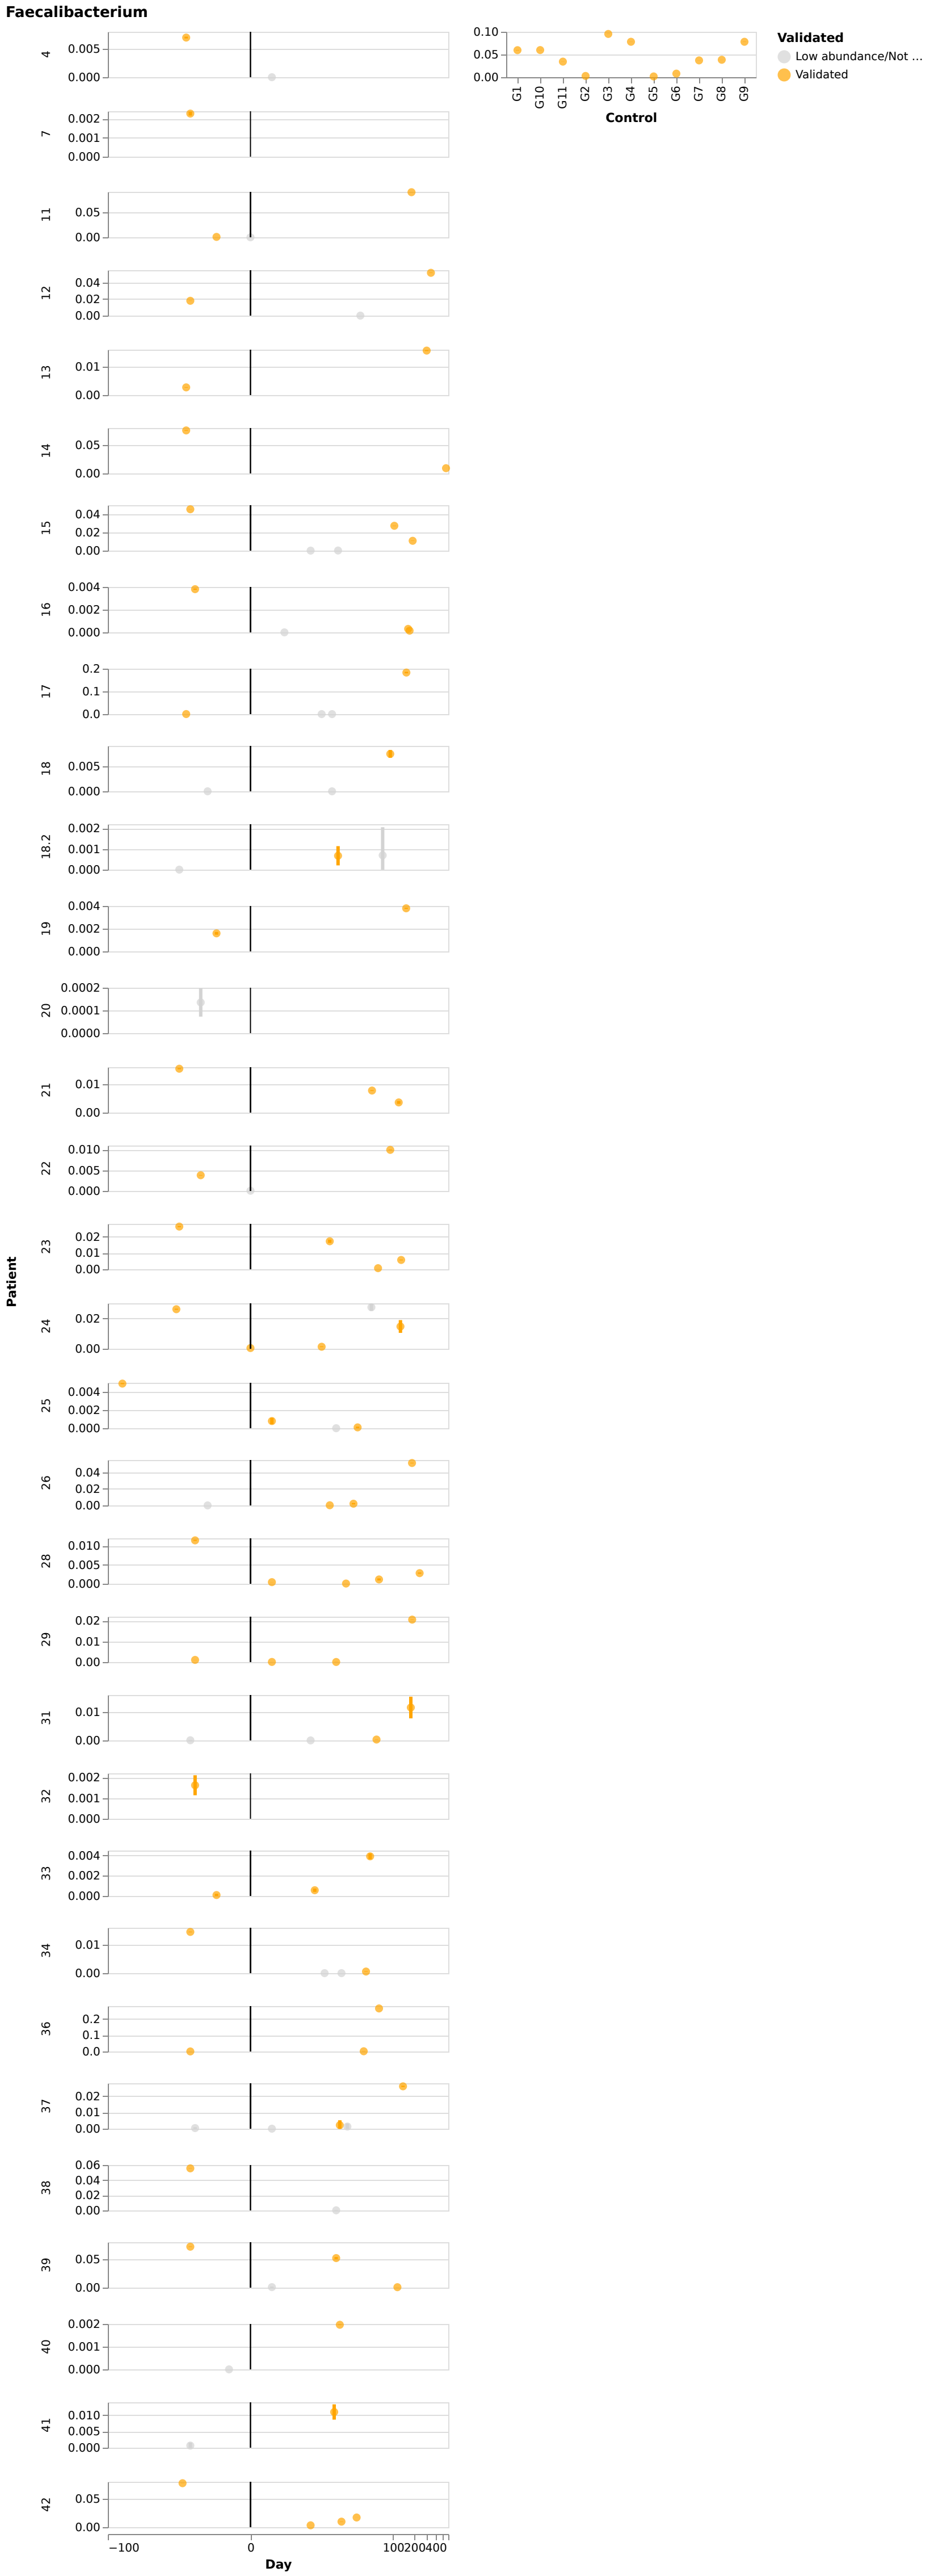

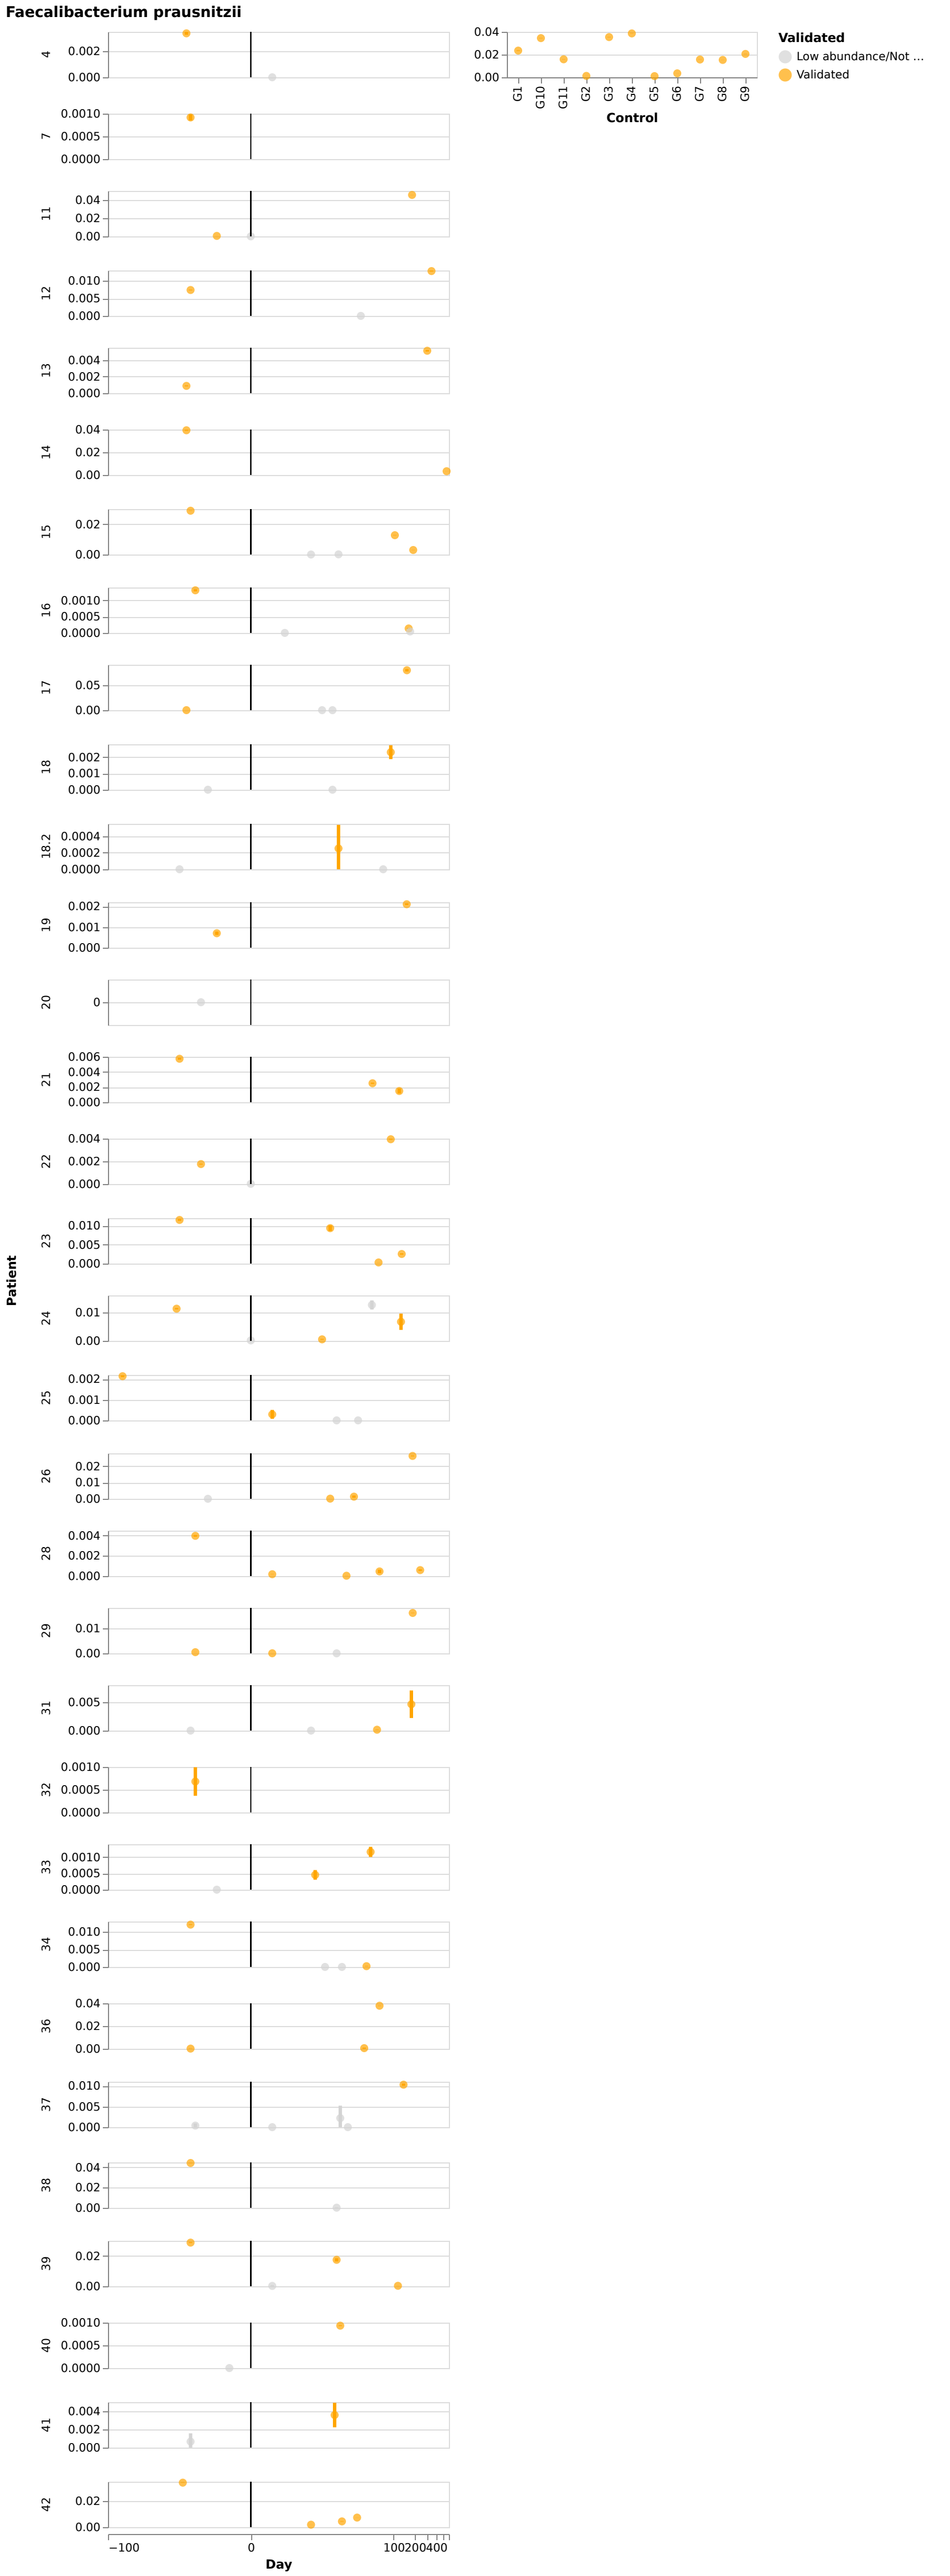

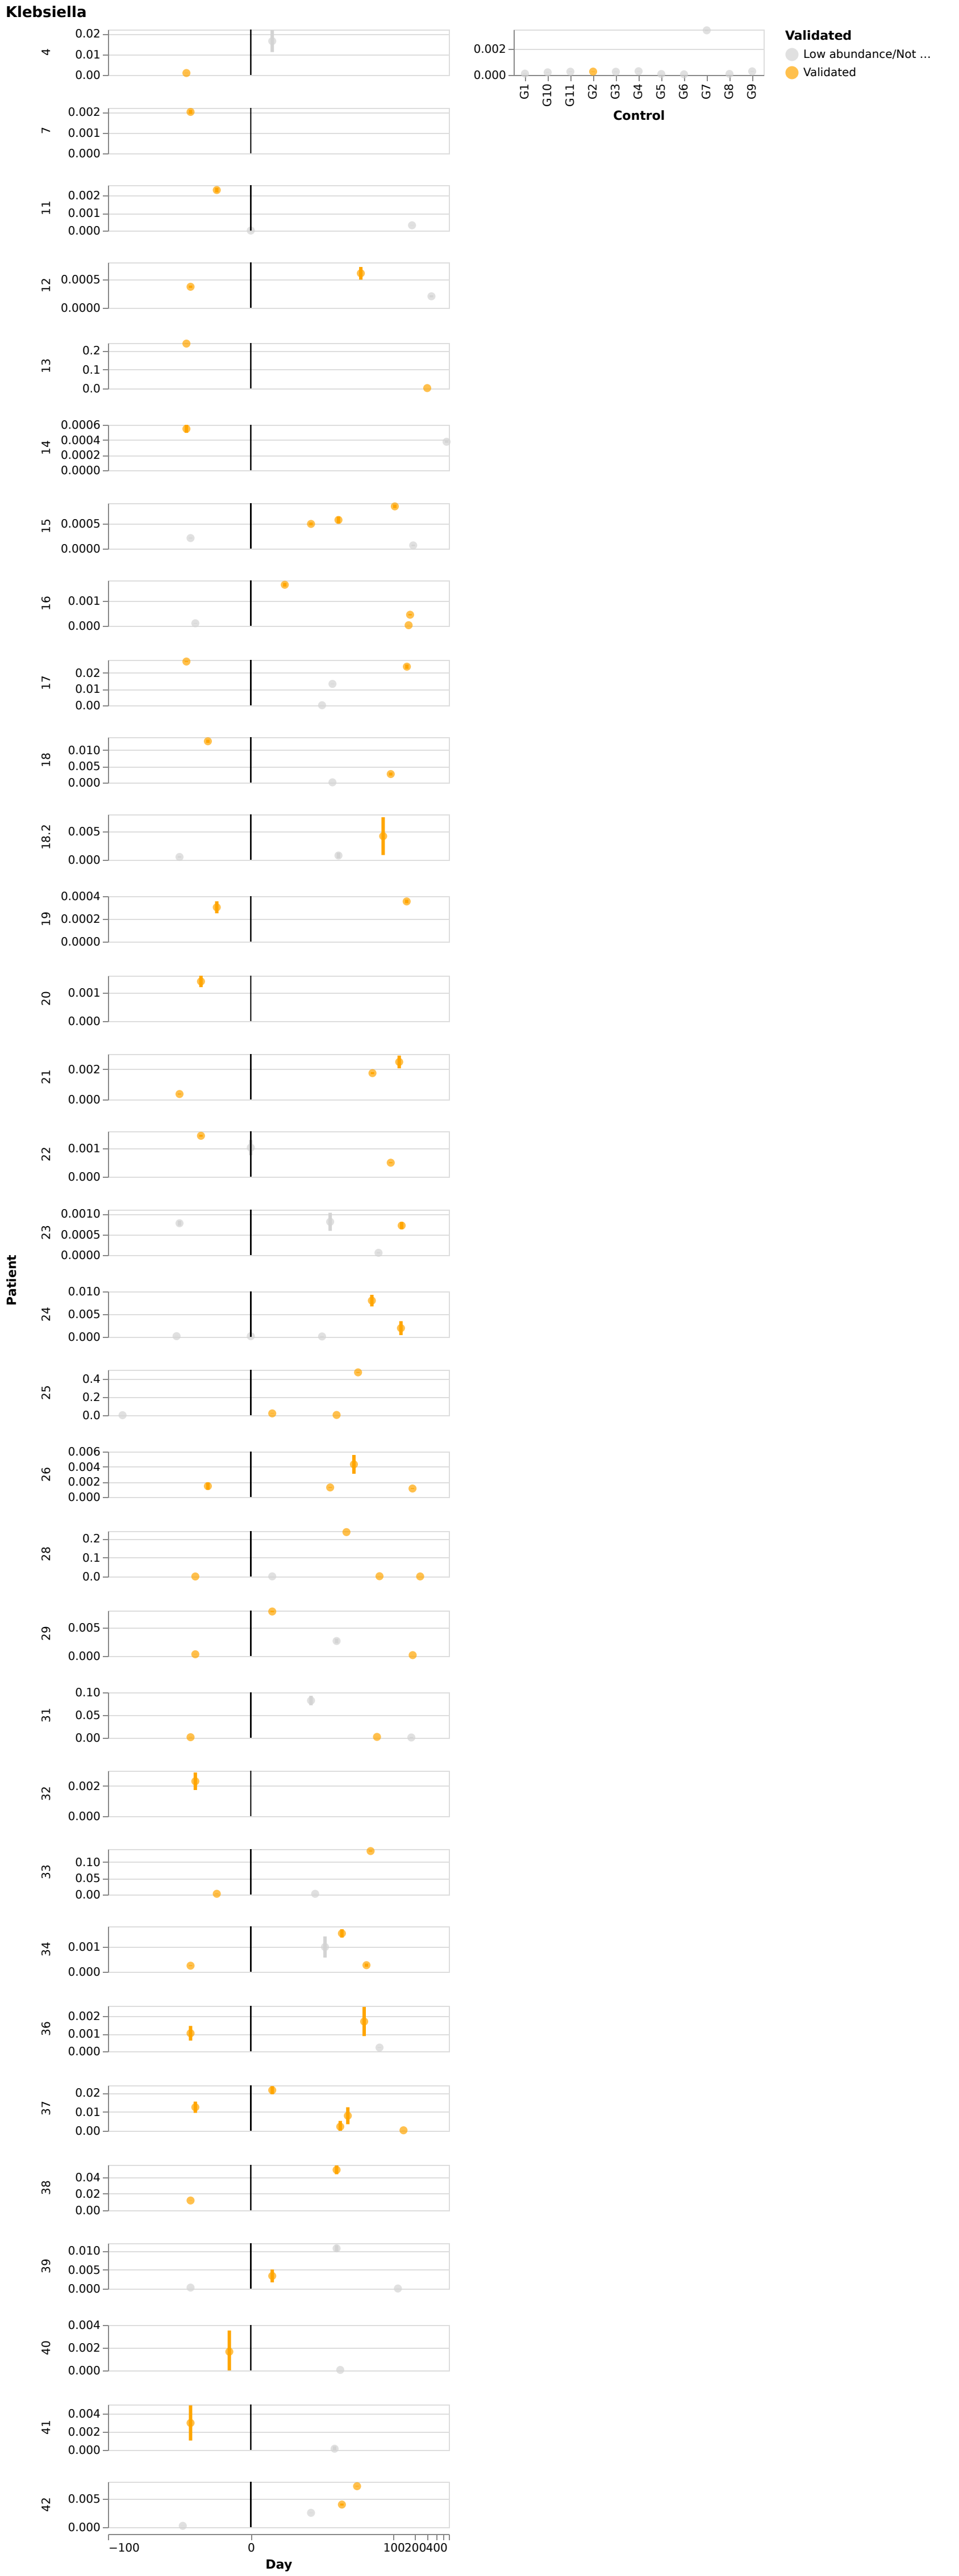



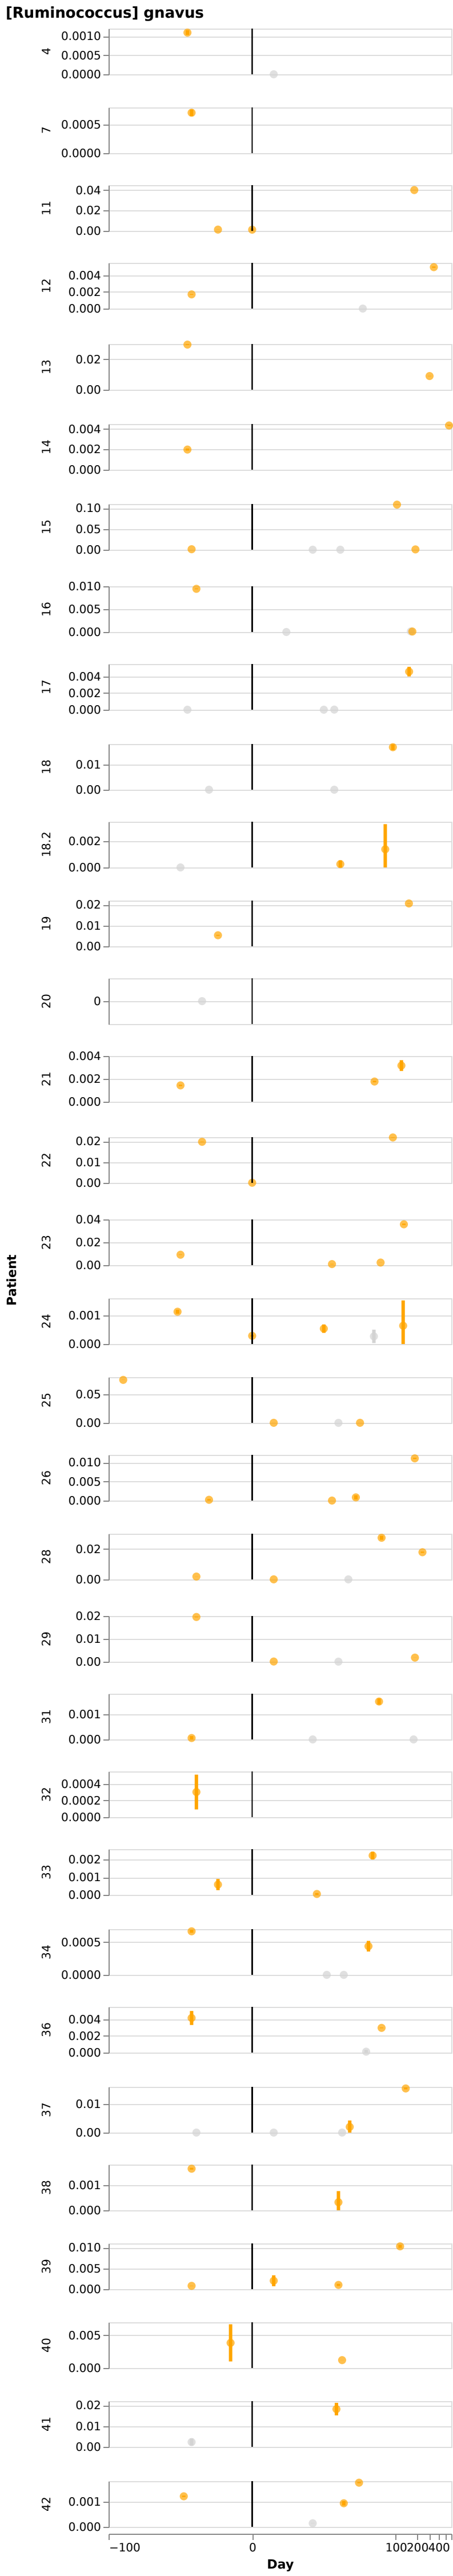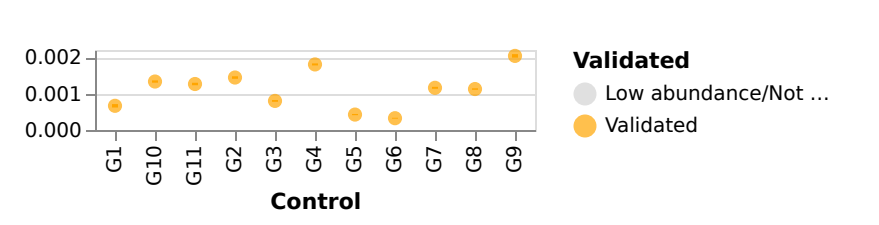

**Validated**

- Low abundance/Not ...
- Validated

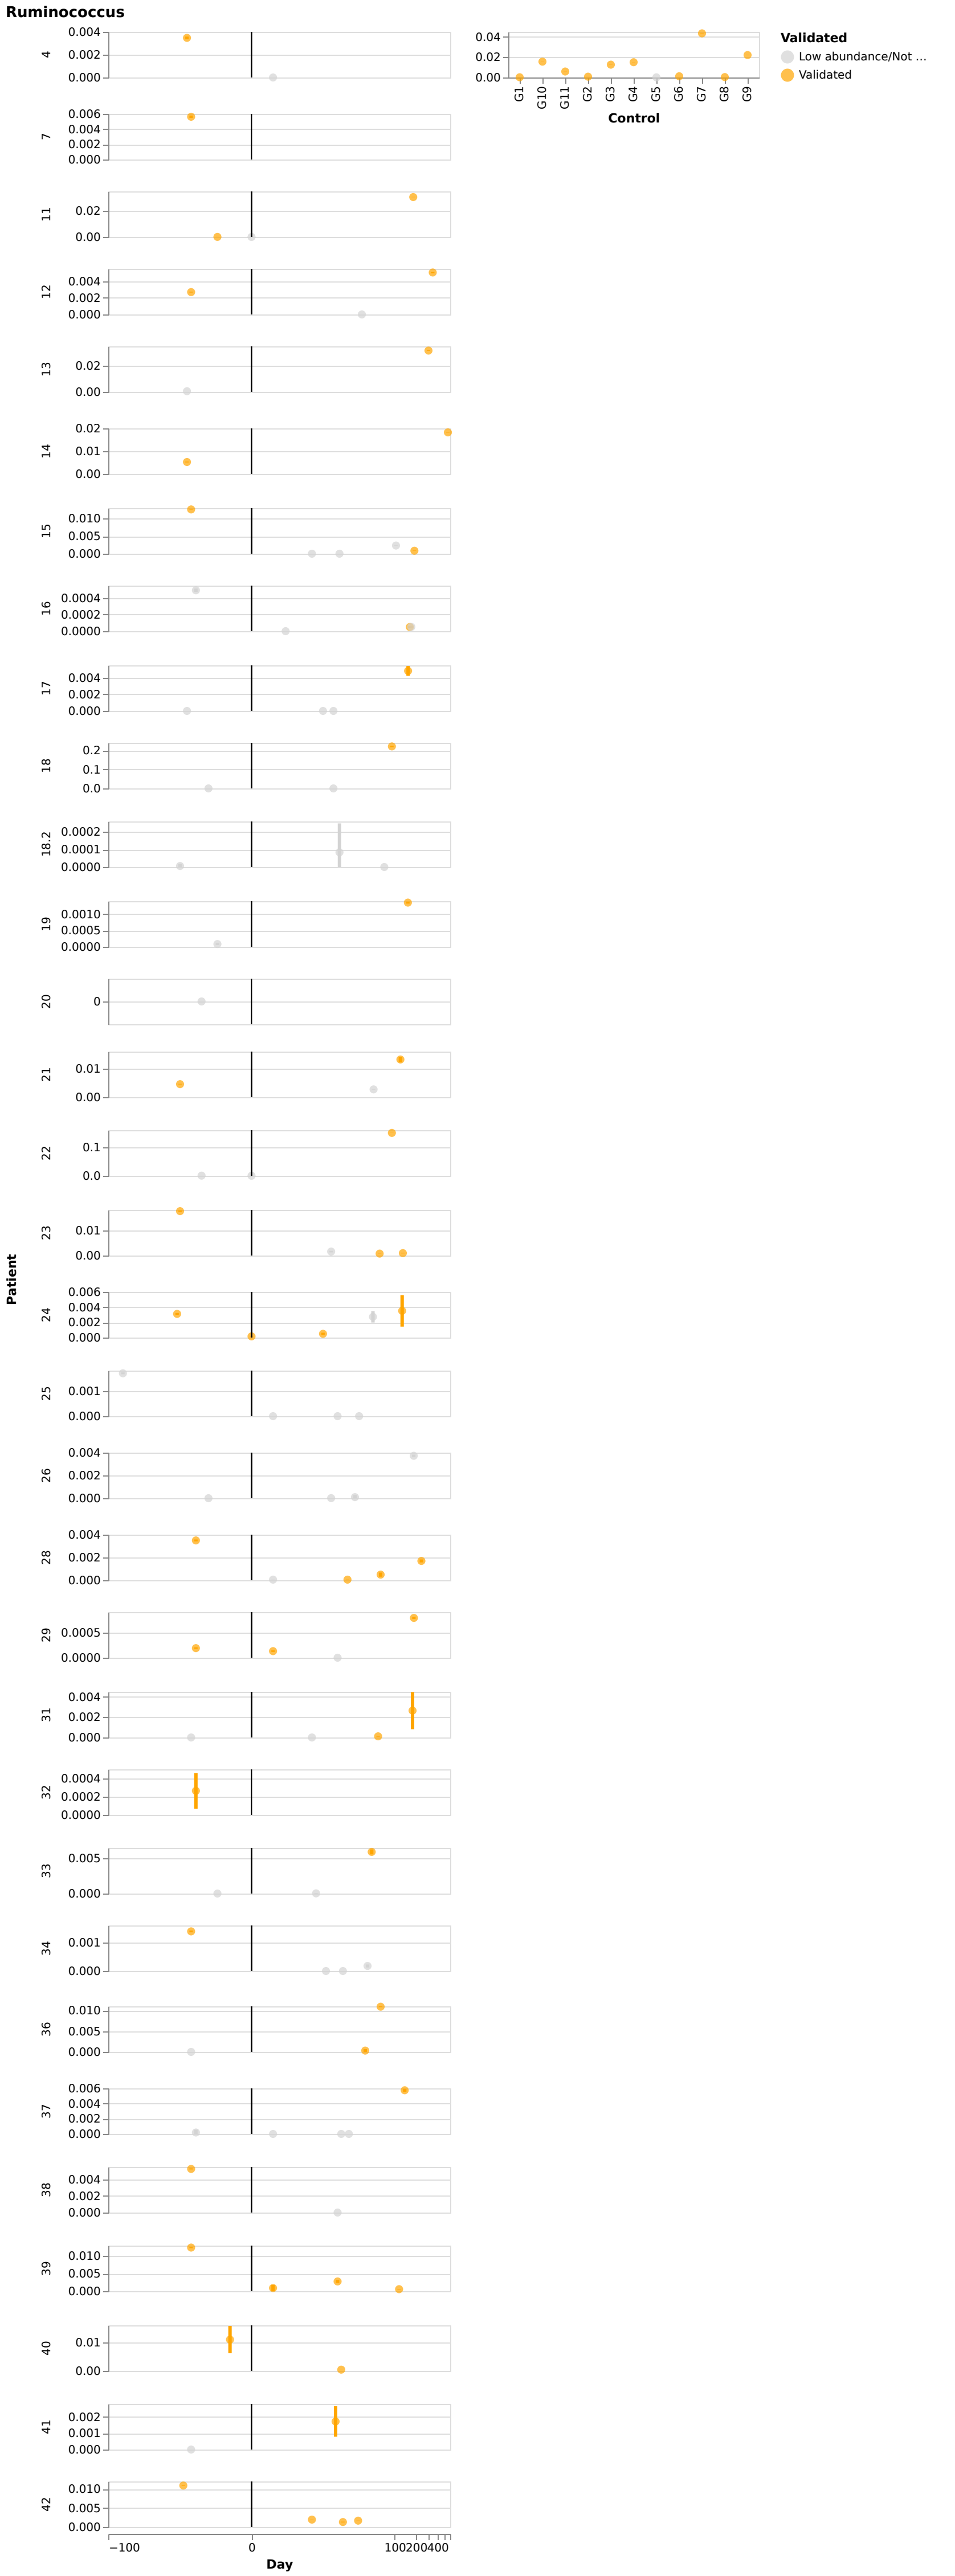

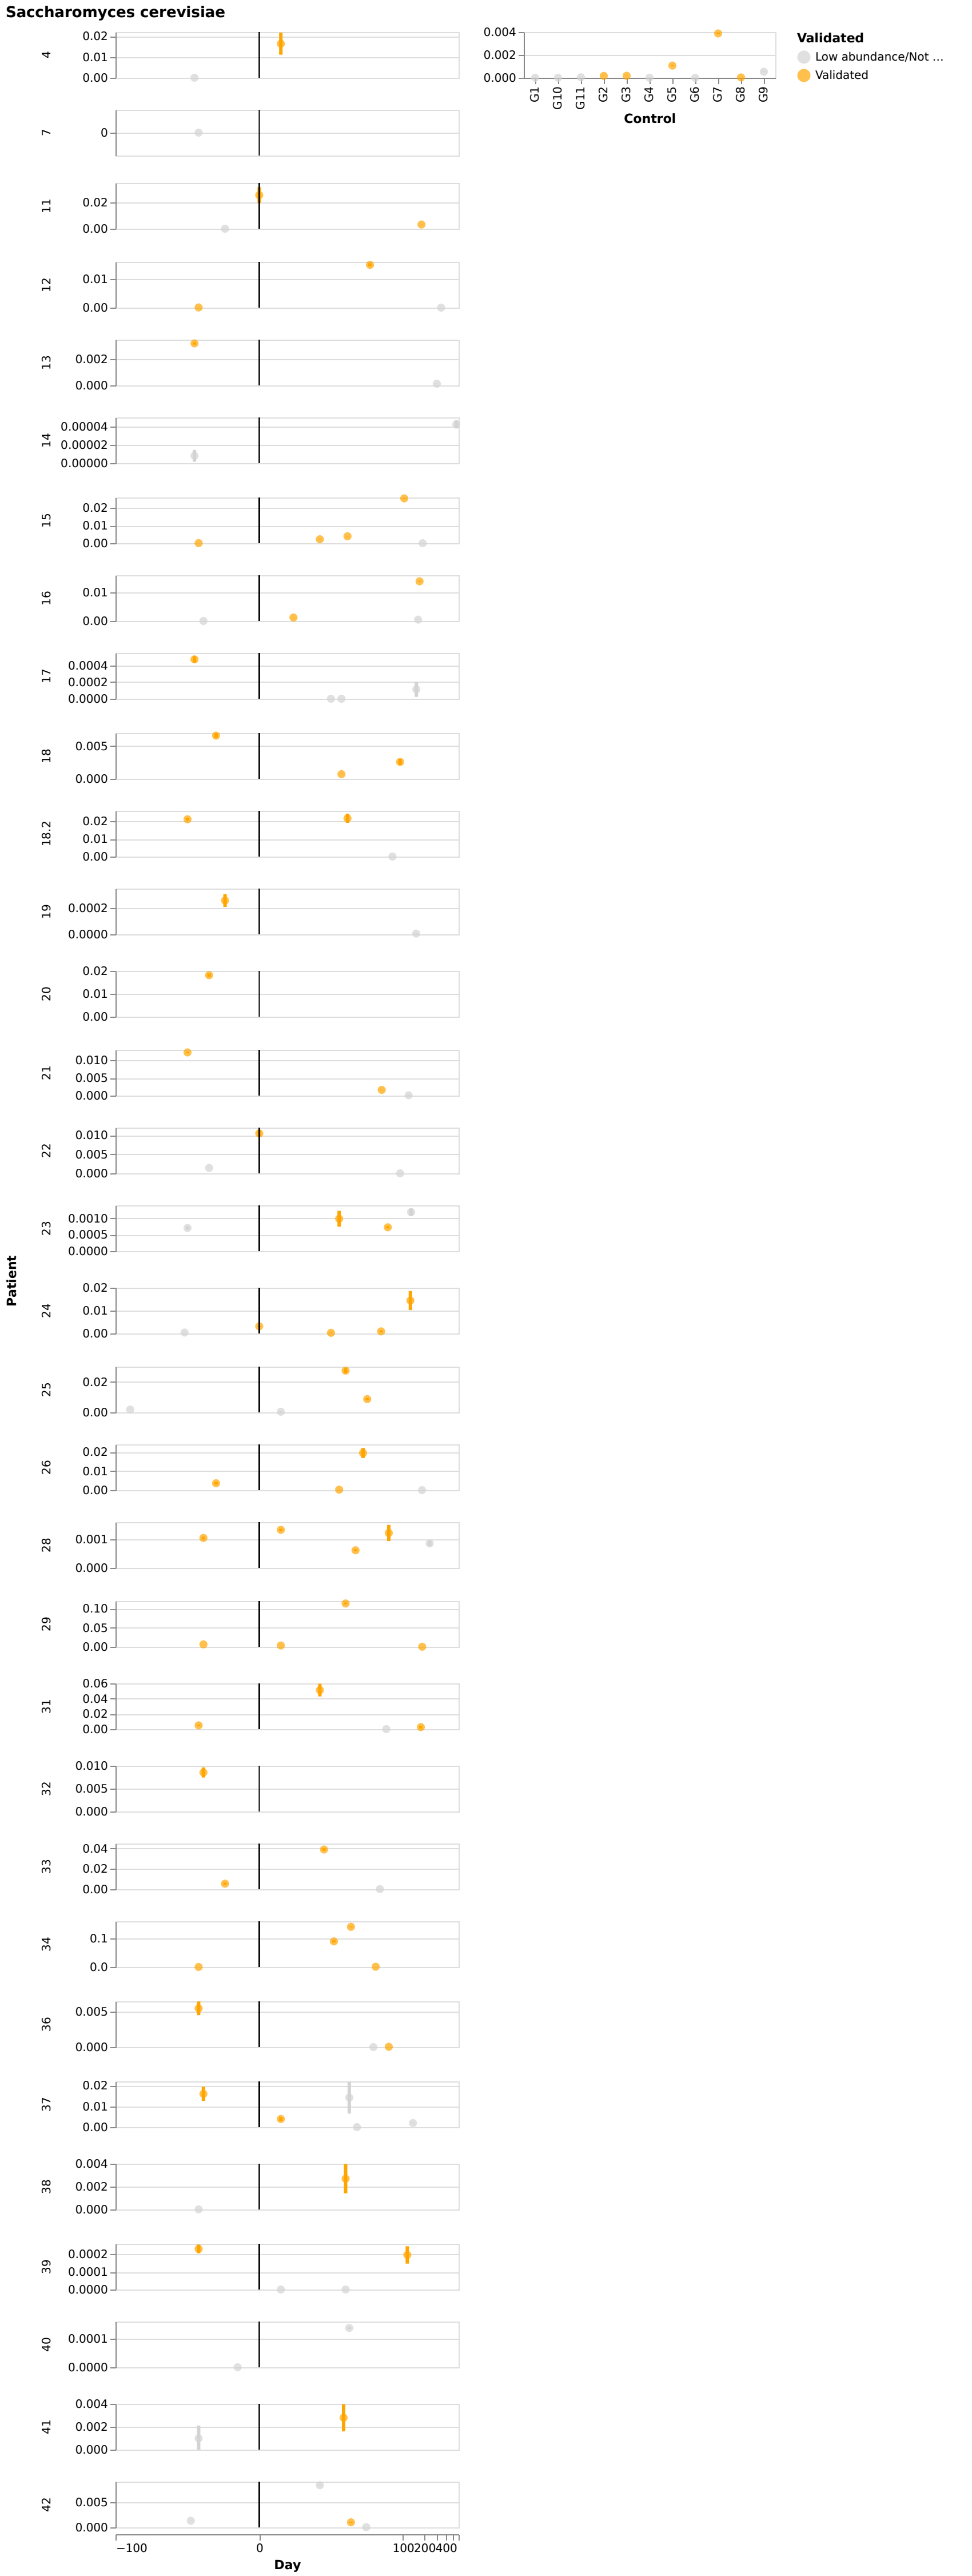



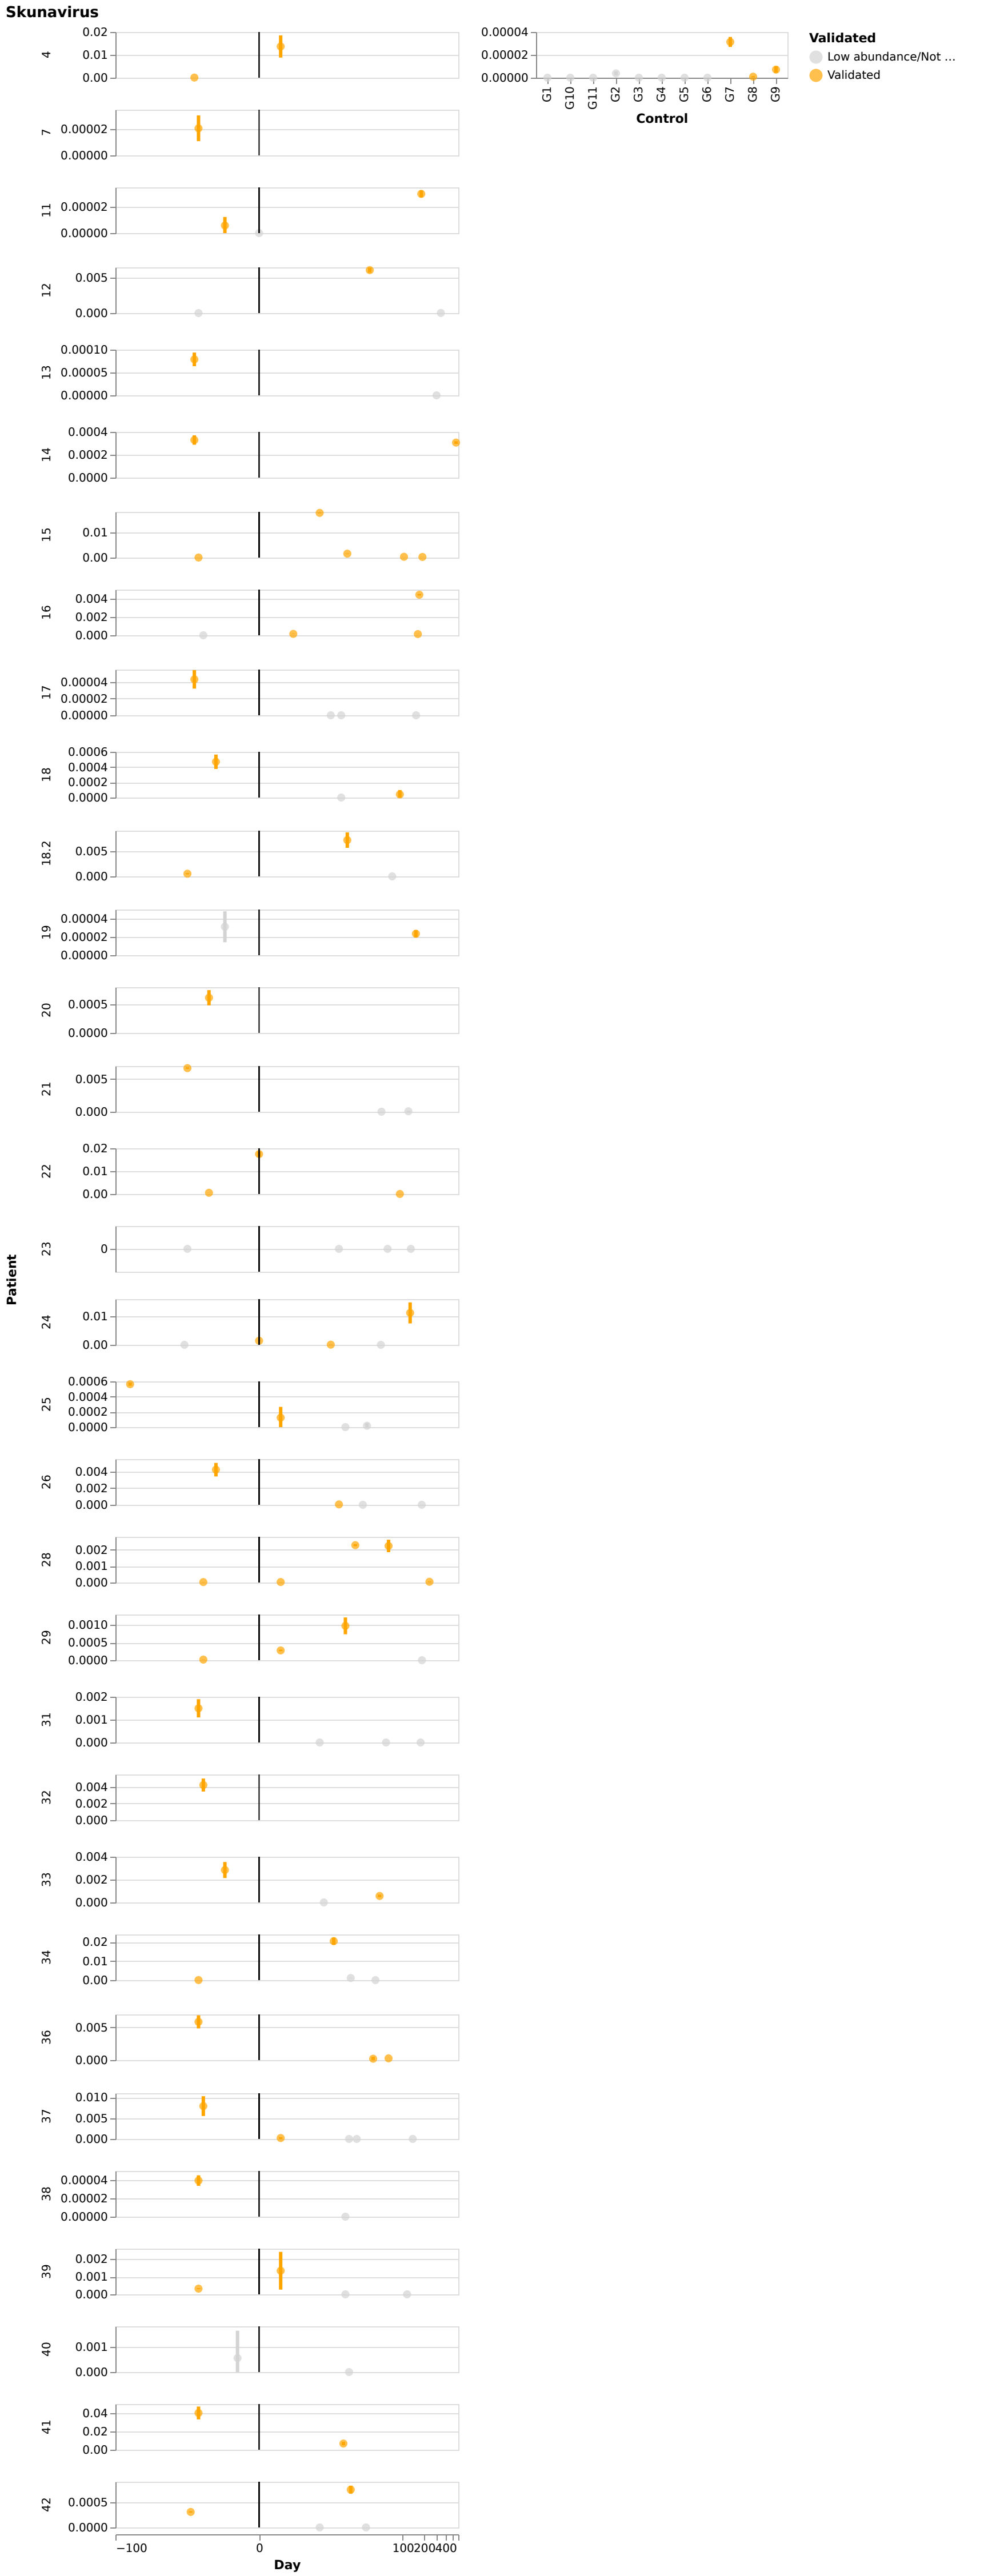

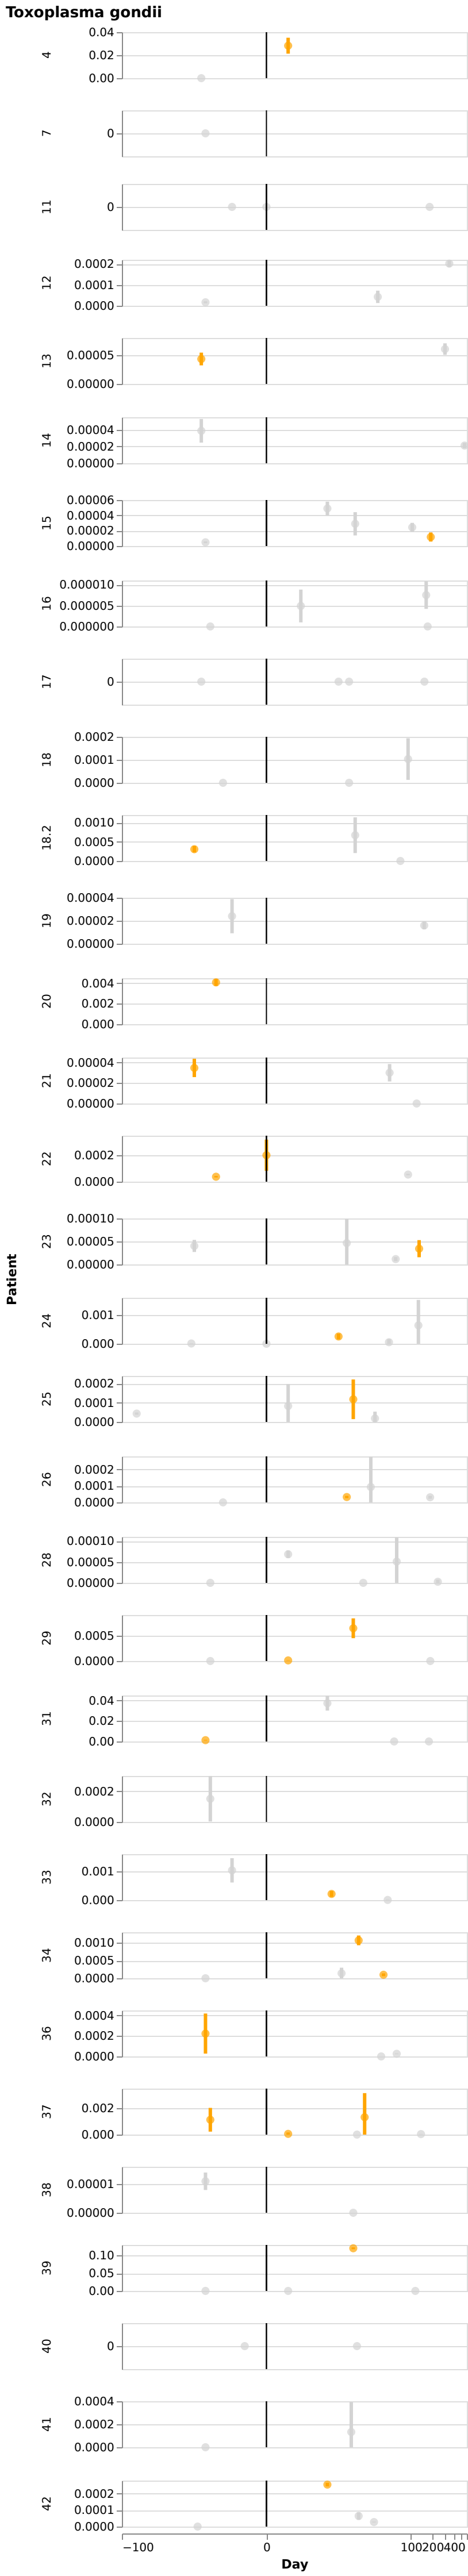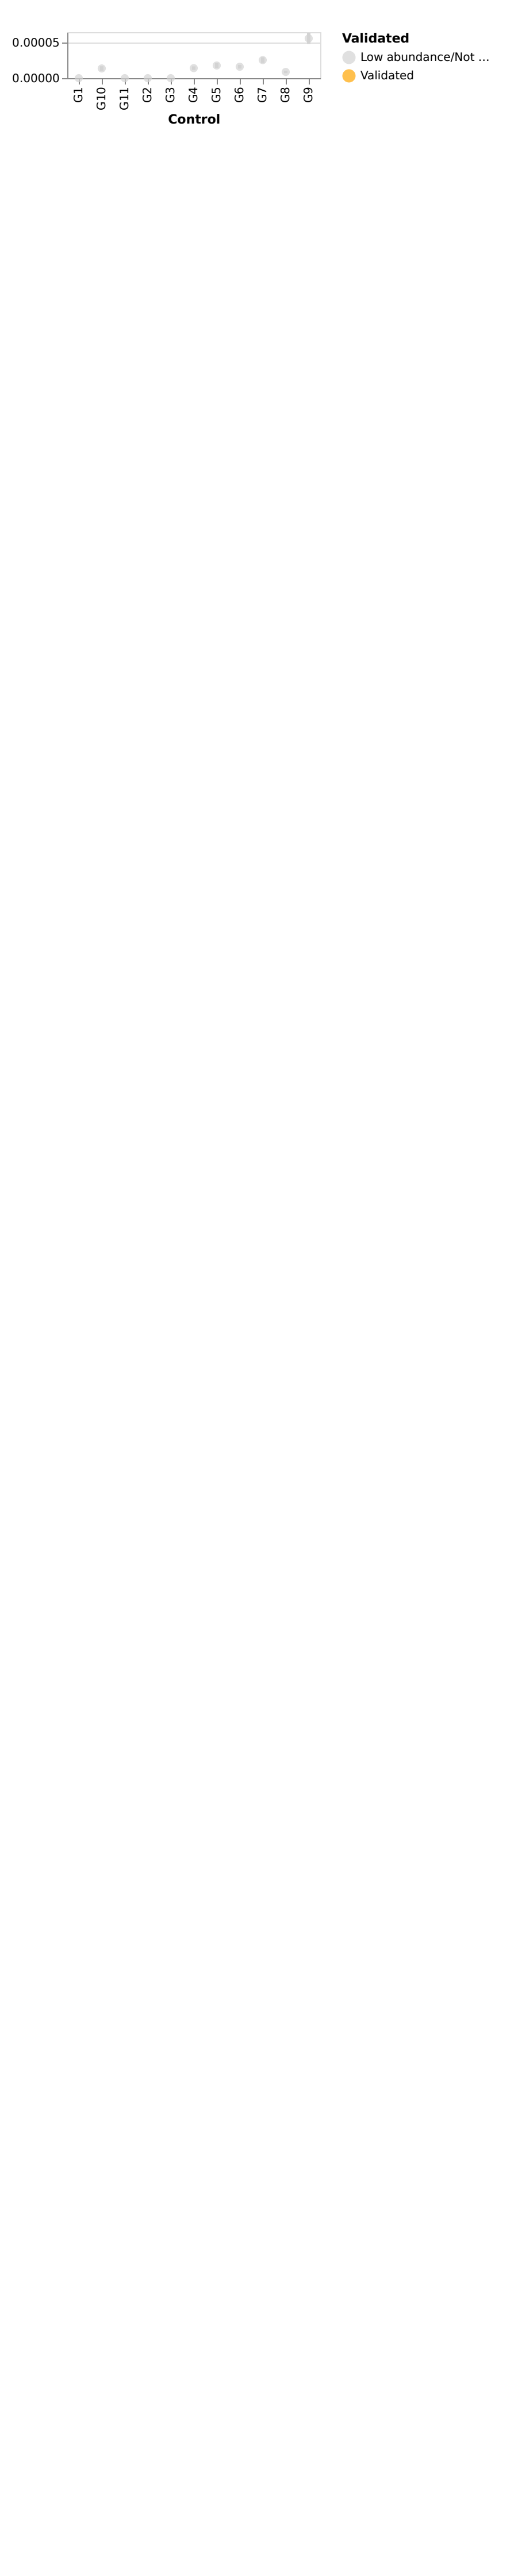

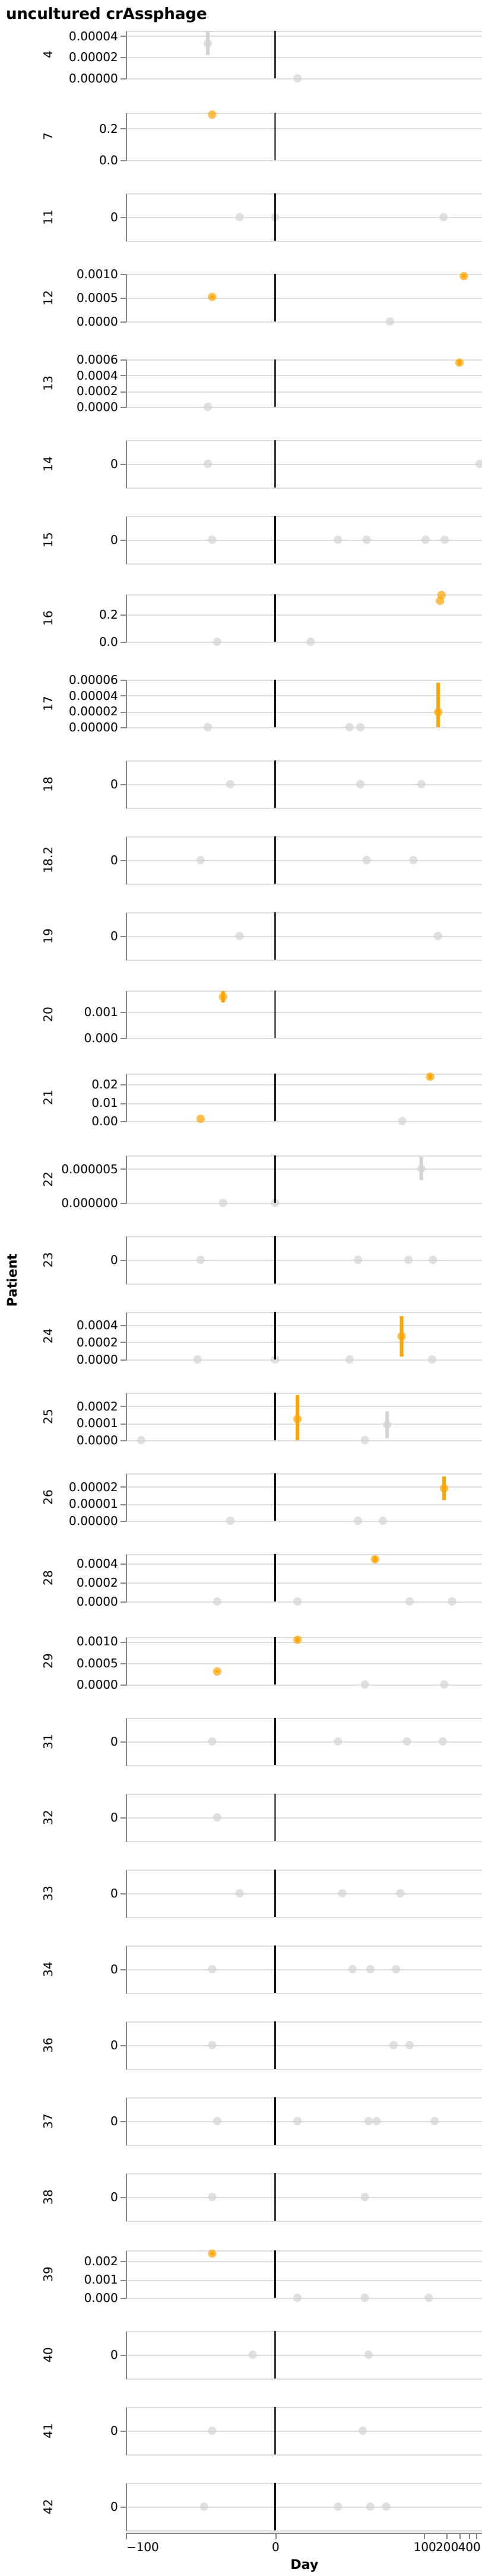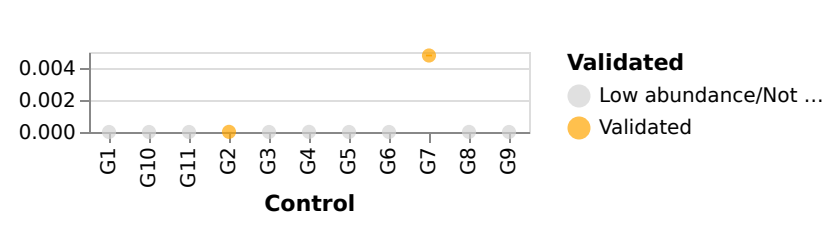

Patient

Day

Validated

● Low abundance/Not Validated

● Validated
